# Supplementary material for: Initial decomposition of floating leaf blades of Nymphoides peltata (S.G. Gmel.) O. Kuntze (Menyanthaceae): causes, impact and succession
Source: PeerJ. 2023 Dec 21;11:e16689. doi: 10.7717/peerj.16689 (PMC10749093; doi:10.7717/peerj.16689)
Supplement: Supplemental Information 2 [file peerj-11-16689-s002.xlsx]

## Sheet: Basic data
Basic data: leaf type, date, leaf nr, leaf length, leaf width, surface, tot % damage, leaf status, leaf age, damage types of plts CB-1 1978-1979, CB-2 1978-1979, BS-1 1980, BS-2 1980
Leaf type	Date	Max temp	Min temp	Leaf #	Length	Width	Surface	Tot % dam	Status	Age	Pot Biom/m	Pot Biom/a	Abs grow	Rel grow	Crea date	Begin surf	Cataclysta %	Rem dam %	Micr dec %	Septoria %	Autolysis %
Plot 2, Nymphoides peltata, tank 2, CT2, 1978, LIES
																								page
1	1978-05-26	130	125	1	60	56	2716.06	0	2	0	8203.59	898	0	0	1978-05-26	2716.06	0	0	0	0	0			1
1	1978-05-30	255	185	1	60	56	2716.06	0	2	4	8203.59		0	0	1978-05-26	2716.06	0	0	0	0	0			1
1	1978-06-02	285	210	1	61	56	2763.09	0	2	7	8345.53		47.0305	1.73157	1978-05-26	2716.06	0	0	0	0	0			1
1	1978-06-07	260	195	1	63	56	2858.37	0	2	12	8633.06		142.303	5.2393	1978-05-26	2716.06	0	0	0	0	0			1
1	1978-06-13	215	155	1	65	60	3153.87	100	2	18	9524.89		437.808	16.1192	1978-05-26	2716.06	0	0	0	0	100			1
1	1978-06-19	205	155	1	65	60	3153.87	100	3	24	9524.89		437.808	16.1192	1978-05-26	2716.06	0	0	0	0	100			1
1	1978-05-26	130	125	2	57	48	2225.37	0	2	0	6722.68		0	0	1978-05-26	2225.37	0	0	0	0	0			1
1	1978-05-30	255	185	2	57	48	2225.37	0	2	4	6722.68		0	0	1978-05-26	2225.37	0	0	0	0	0			1
1	1978-06-02	285	210	2	66	57	3053.76	0	2	7	9222.74		828.383	37.2245	1978-05-26	2225.37	0	0	0	0	0			1
1	1978-06-07	260	195	2	66	58	3103.61	0	2	12	9373.21		878.24	39.4649	1978-05-26	2225.37	0	0	0	0	0			1
1	1978-06-13	215	155	2	66	60	3204.54	0	2	18	9677.79		979.164	44	1978-05-26	2225.37	0	0	0	0	0			1
1	1978-06-19	205	155	2	68	60	3307.07	100	2	24	9987.26		1081.7	48.6077	1978-05-26	2225.37	0	0	0	0	100			1
1	1978-06-23	190	170	2	68	60	3307.07	100	2	28	9987.26		1081.7	48.6077	1978-05-26	2225.37	0	0	60	0	40			1
1	1978-06-25	190	140	2	68	60	3307.07	100	3	30	9987.26		1081.7	48.6077	1978-05-26	2225.37	0	0	60	0	40			1
1	1978-05-26	130	125	3	54	52	2267.96	0	2	0	6851.21		0	0	1978-05-26	2267.96	0	0	0	0	0			1
1	1978-05-30	255	185	3	54	53	2310.96	0	2	4	6980.97		42.9936	1.89569	1978-05-26	2267.96	0	0	0	0	0			1
1	1978-06-02	285	210	3	54	53	2310.96	0	2	7	6980.97		42.9936	1.89569	1978-05-26	2267.96	0	0	0	0	0			1
1	1978-06-07	260	195	3	54	53	2310.96	0	3	12	6980.97		42.9936	1.89569	1978-05-26	2267.96	0	0	0	0	0			1
1	1978-05-26	130	125	4	55	55	2442.36	0	2	0	7377.54		0	0	1978-05-26	2442.36	0	0	0	0	0			1
1	1978-05-30	255	185	4	55	55	2442.36	0	2	4	7377.54		0	0	1978-05-26	2442.36	0	0	0	0	0			1
1	1978-06-02	285	210	4	55	55	2442.36	20	2	7	7377.54		0	0	1978-05-26	2442.36	0	0	0	0	20			1
1	1978-06-07	260	195	4	55	55	2442.36	100	2	12	7377.54		0	0	1978-05-26	2442.36	0	0	85	0	15			1
1	1978-06-13	215	155	4	55	55	2442.36	100	3	18	7377.54		0	0	1978-05-26	2442.36	0	0	85	0	15			1
1	1978-05-26	130	125	5	63	52	2669.44	0	2	0	8062.87		0	0	1978-05-26	2669.44	0	0	0	0	0			1
1	1978-05-30	255	185	5	63	52	2669.44	0	2	4	8062.87		0	0	1978-05-26	2669.44	0	0	0	0	0			1
1	1978-06-02	285	210	5	63	52	2669.44	10	2	7	8062.87		0	0	1978-05-26	2669.44	0	0	0	0	10			1
1	1978-06-07	260	195	5	63	52	2669.44	60	2	12	8062.87		0	0	1978-05-26	2669.44	0	0	0	0	60			1
1	1978-06-13	215	155	5	63	52	2669.44	100	2	18	8062.87		0	0	1978-05-26	2669.44	0	0	70	0	30			1
1	1978-06-19	205	155	5	63	52	2669.44	100	3	24	8062.87		0	0	1978-05-26	2669.44	0	0	70	0	30			1
1	1978-05-26	130	125	6	38	35	1075.65	0	2	0	3252.81		0	0	1978-05-26	1075.65	0	0	0	0	0			1
1	1978-05-30	255	185	6	38	35	1075.65	0	2	4	3252.81		0	0	1978-05-26	1075.65	0	0	0	0	0			1
1	1978-06-02	285	210	6	38	35	1075.65	20	2	7	3252.81		0	0	1978-05-26	1075.65	0	0	0	0	20			1
1	1978-06-07	260	195	6	38	35	1075.65	20	3	12	3252.81		0	0	1978-05-26	1075.65	0	0	0	0	20			1
1	1978-05-26	130	125	7	27	26	566.99	100	2	0	1717.68		0	0	1978-05-26	566.99	0	0	0	0	100			1
1	1978-05-30	255	185	7	27	26	566.99	100	2	4	1717.68		0	0	1978-05-26	566.99	0	0	70	0	30			1
1	1978-06-02	285	210	7	27	26	566.99	100	3	7	1717.68		0	0	1978-05-26	566.99	0	0	70	0	30			1
1	1978-05-26	130	125	8	22	21	373.217	100	2	0	1132.87		0	0	1978-05-26	373.217	0	0	0	0	100			1
1	1978-05-30	255	185	8	22	21	373.217	100	2	4	1132.87		0	0	1978-05-26	373.217	0	0	80	0	20			1
1	1978-06-02	285	210	8	22	21	373.217	100	3	7	1132.87		0	0	1978-05-26	373.217	0	0	80	0	20			1
1	1978-05-26	130	125	9	57	55	2531.98	0	2	0	7648.02		0	0	1978-05-26	2531.98	0	0	0	0	0			1
1	1978-05-30	255	185	9	58	55	2577.39	0	2	4	7785.08		45.4158	1.79369	1978-05-26	2531.98	0	0	0	0	0			1
1	1978-06-02	285	210	9	60	56	2716.06	0	2	7	8203.59		184.085	7.27041	1978-05-26	2531.98	0	0	0	0	0			1
1	1978-06-07	260	195	9	60	56	2716.06	10	2	12	8203.59		184.085	7.27041	1978-05-26	2531.98	0	0	0	0	10			1
1	1978-06-13	215	155	9	60	56	2716.06	10	2	18	8203.59		184.085	7.27041	1978-05-26	2531.98	0	0	5	0	5			1
1	1978-06-19	205	155	9	60	56	2716.06	100	2	24	8203.59		184.085	7.27041	1978-05-26	2531.98	0	0	50	0	50			1
1	1978-06-23	190	170	9	60	56	2716.06	100	3	28	8203.59		184.085	7.27041	1978-05-26	2531.98	0	0	50	0	50			1
1	1978-05-26	130	125	10	60	57	2763.09	0	2	0	8345.53		0	0	1978-05-26	2763.09	0	0	0	0	0			1
1	1978-05-30	255	185	10	60	57	2763.09	0	2	4	8345.53		0	0	1978-05-26	2763.09	0	0	0	0	0			1
1	1978-06-02	285	210	10	60	57	2763.09	0	2	7	8345.53		0	0	1978-05-26	2763.09	0	0	0	0	0			1
1	1978-06-07	260	195	10	60	59	2858.37	10	2	12	8633.06		95.2722	3.44802	1978-05-26	2763.09	0	0	0	0	10			1
1	1978-06-13	215	155	10	60	59	2858.37	25	2	18	8633.06		95.2722	3.44802	1978-05-26	2763.09	0	0	0	0	25			1
1	1978-06-19	205	155	10	60	59	2858.37	100	2	24	8633.06		95.2722	3.44802	1978-05-26	2763.09	0	0	40	0	60			1
1	1978-06-23	190	170	10	60	59	2858.37	100	3	28	8633.06		95.2722	3.44802	1978-05-26	2763.09	0	0	40	0	60			1
1	1978-05-26	130	125	11	50	46	1860.23	0	2	0	5620.68		0	0	1978-05-26	1860.23	0	0	0	0	0			1
1	1978-05-30	255	185	11	50	46	1860.23	0	2	4	5620.68		0	0	1978-05-26	1860.23	0	0	0	0	0			1
1	1978-06-02	285	210	11	51	46	1899.19	0	2	7	5738.25		38.9566	2.09418	1978-05-26	1860.23	0	0	0	0	0			1
1	1978-06-07	260	195	11	51	46	1899.19	15	2	12	5738.25		38.9566	2.09418	1978-05-26	1860.23	0	0	0	0	15			1
1	1978-06-13	215	155	11	51	50	2059.05	100	2	18	6220.72		198.82	10.6879	1978-05-26	1860.23	0	0	50	0	50			1
1	1978-06-19	205	155	11	51	50	2059.05	100	3	24	6220.72		198.82	10.6879	1978-05-26	1860.23	0	0	50	0	50			1
1	1978-05-26	130	125	12	46	53	1978.31	0	2	0	5977.05		0	0	1978-05-26	1978.31	0	0	0	0	0			2
1	1978-05-30	255	185	12	46	53	1978.31	0	2	4	5977.05		0	0	1978-05-26	1978.31	0	0	0	0	0			2
1	1978-06-02	285	210	12	46	53	1978.31	100	2	7	5977.05		0	0	1978-05-26	1978.31	0	0	0	0	100			2
1	1978-06-07	260	195	12	46	53	1978.31	100	3	12	5977.05		0	0	1978-05-26	1978.31	0	0	0	0	100			2
1	1978-05-26	130	125	13	27	28	610.59	100	2	0	1849.27		0	0	1978-05-26	610.59	0	0	0	0	100			2
1	1978-05-30	255	185	13	27	28	610.59	100	2	4	1849.27		0	0	1978-05-26	610.59	0	20	60	0	20			2
1	1978-06-02	285	210	13	27	28	610.59	100	3	7	1849.27		0	0	1978-05-26	610.59	0	20	60	0	20			2
1	1978-05-26	130	125	14	44	42	1492.87	0	2	0	4511.98		0	0	1978-05-26	1492.87	0	0	0	0	0			2
1	1978-05-30	255	185	14	44	42	1492.87	0	2	4	4511.98		0	0	1978-05-26	1492.87	0	0	0	0	0			2
1	1978-06-02	285	210	14	44	42	1492.87	25	2	7	4511.98		0	0	1978-05-26	1492.87	0	0	0	0	25			2
1	1978-06-07	260	195	14	44	42	1492.87	100	2	12	4511.98		0	0	1978-05-26	1492.87	0	0	10	0	90			2
1	1978-06-13	215	155	14	44	42	1492.87	100	3	18	4511.98		0	0	1978-05-26	1492.87	0	0	10	0	90			2
1	1978-05-26	130	125	15	70	67	3788.48	0	2	0	11440.1		0	0	1978-05-26	3788.48	0	0	0	0	0			2
1	1978-05-30	255	185	15	71	67	3843.99	0	2	4	11607.7		55.5081	1.46518	1978-05-26	3788.48	0	0	0	0	0			2
1	1978-06-02	285	210	15	72	67	3899.9	0	2	7	11776.4		111.42	2.94102	1978-05-26	3788.48	0	0	0	0	0			2
1	1978-06-07	260	195	15	72	68	3956.22	10	2	12	11946.4		167.736	4.42751	1978-05-26	3788.48	0	0	0	0	10			2
1	1978-06-13	215	155	15	75	68	4127.59	70	2	18	12463.6		339.104	8.95093	1978-05-26	3788.48	0	0	0	0	70			2
1	1978-06-19	205	155	15	75	68	4127.59	100	2	24	12463.6		339.104	8.95093	1978-05-26	3788.48	0	0	60	0	40			2
1	1978-06-23	190	170	15	75	68	4127.59	100	3	28	12463.6		339.104	8.95093	1978-05-26	3788.48	0	0	60	0	40			2
1	1978-05-26	130	125	16	55	50	2225.37	0	2	0	6722.68		0	0	1978-05-26	2225.37	0	0	0	0	0			2
1	1978-05-30	255	185	16	55	50	2225.37	0	2	4	6722.68		0	0	1978-05-26	2225.37	0	0	0	0	0			2
1	1978-06-02	285	210	16	56	50	2267.96	0	2	7	6851.21		42.5899	1.91383	1978-05-26	2225.37	0	0	0	0	0			2
1	1978-06-07	260	195	16	66	51	2763.09	0	2	12	8345.53		537.723	24.1633	1978-05-26	2225.37	0	0	0	0	0			2
1	1978-06-13	215	155	16	70	60	3411.23	0	2	18	10301.6		1185.86	53.288	1978-05-26	2225.37	0	0	0	0	0			2
1	1978-06-19	205	155	16	70	60	3411.23	0	2	24	10301.6		1185.86	53.288	1978-05-26	2225.37	0	0	0	0	0			2
1	1978-06-23	190	170	16	70	61	3463.91	100	2	28	10460.6		1238.54	55.6553	1978-05-26	2225.37	0	0	0	0	100			2
1	1978-06-25	190	140	16	70	61	3463.91	100	3	30	10460.6		1238.54	55.6553	1978-05-26	2225.37	0	0	0	0	100			2
1	1978-05-26	130	125	17	60	56	2716.06	0	2	0	8203.59		0	0	1978-05-26	2716.06	0	0	0	0	0			2
1	1978-05-30	255	185	17	61	56	2763.09	0	2	4	8345.53		47.0305	1.73157	1978-05-26	2716.06	0	0	0	0	0			2
1	1978-06-02	285	210	17	61	57	2810.53	15	2	7	8488.68		94.4648	3.478	1978-05-26	2716.06	0	0	0	0	15			2
1	1978-06-07	260	195	17	62	59	2955.25	50	2	12	8925.46		239.19	8.80648	1978-05-26	2716.06	0	0	0	0	50			2
1	1978-06-13	215	155	17	62	59	2955.25	100	2	18	8925.46		239.19	8.80648	1978-05-26	2716.06	0	0	50	0	50			2
1	1978-06-19	205	155	17	62	59	2955.25	100	3	24	8925.46		239.19	8.80648	1978-05-26	2716.06	0	0	50	0	50			2
1	1978-05-26	130	125	18	76	69	4243.85	0	2	0	12814.4		0	0	1978-05-26	4243.85	0	0	0	0	0			2
1	1978-05-30	255	185	18	76	69	4243.85	0	2	4	12814.4		0	0	1978-05-26	4243.85	0	0	0	0	0			2
1	1978-06-02	285	210	18	76	69	4243.85	0	2	7	12814.4		0	0	1978-05-26	4243.85	0	0	0	0	0			2
1	1978-06-07	260	195	18	80	71	4602.33	0	2	12	13896.3		358.482	8.44709	1978-05-26	4243.85	0	0	0	0	0			2
1	1978-06-13	215	155	18	80	71	4602.33	20	2	18	13896.3		358.482	8.44709	1978-05-26	4243.85	0	0	0	0	20			2
1	1978-06-19	205	155	18	80	71	4602.33	30	2	24	13896.3		358.482	8.44709	1978-05-26	4243.85	0	0	0	0	30			2
1	1978-06-23	190	170	18	80	71	4602.33	60	2	28	13896.3		358.482	8.44709	1978-05-26	4243.85	0	0	20	0	40			2
1	1978-06-25	190	140	18	80	71	4602.33	60	3	30	13896.3		358.482	8.44709	1978-05-26	4243.85	0	0	20	0	40			2
1	1978-05-26	130	125	19	65	62	3255.6	0	2	0	9831.92		0	0	1978-05-26	3255.6	0	0	0	0	0			2
1	1978-05-30	255	185	19	65	62	3255.6	0	2	4	9831.92		0	0	1978-05-26	3255.6	0	0	0	0	0			2
1	1978-06-02	285	210	19	65	62	3255.6	20	2	7	9831.92		0	0	1978-05-26	3255.6	0	0	0	0	20			2
1	1978-06-07	260	195	19	65	62	3255.6	61	2	12	9831.92		0	0	1978-05-26	3255.6	1	0	0	0	60			2
1	1978-06-13	215	155	19	65	62	3255.6	100	2	18	9831.92		0	0	1978-05-26	3255.6	1	0	75	0	24			2
1	1978-06-19	205	155	19	65	62	3255.6	100	3	24	9831.92		0	0	1978-05-26	3255.6	1	0	75	0	24			2
1	1978-05-26	130	125	20	72	63	3678.68	0	2	0	11108.8		0	0	1978-05-26	3678.68	0	0	0	0	0			2
1	1978-05-30	255	185	20	72	63	3678.68	0	2	4	11108.8		0	0	1978-05-26	3678.68	0	0	0	0	0			2
1	1978-06-02	285	210	20	72	65	3788.48	0	2	7	11440.1		109.805	2.98491	1978-05-26	3678.68	0	0	0	0	0			2
1	1978-06-07	260	195	20	74	69	4127.59	0	2	12	12463.6		448.91	12.203	1978-05-26	3678.68	0	0	0	0	0			2
1	1978-06-13	215	155	20	76	69	4243.85	0	2	18	12814.4		565.174	15.3635	1978-05-26	3678.68	0	0	0	0	0			2
1	1978-06-19	205	155	20	76	70	4302.59	15	2	24	12991.7		623.912	16.9602	1978-05-26	3678.68	0	0	0	0	15			2
1	1978-06-23	190	170	20	77	70	4361.73	30	2	28	13170.2		683.053	18.5679	1978-05-26	3678.68	0	0	0	0	30			2
1	1978-06-25	190	140	20	77	70	4361.73	30	3	30	13170.2		683.053	18.5679	1978-05-26	3678.68	0	0	0	0	30			2
1	1978-05-26	130	125	21	33	37	989.054	0	2	0	2991.47		0	0	1978-05-26	989.054	0	0	0	0	0			2
1	1978-05-30	255	185	21	33	37	989.054	70	2	4	2991.47		0	0	1978-05-26	989.054	0	0	0	0	70			2
1	1978-06-02	285	210	21	33	37	989.054	70	3	7	2991.47		0	0	1978-05-26	989.054	0	0	0	0	70			2
1	1978-05-26	130	125	22	60	58	2810.53	0	2	0	8488.68		0	0	1978-05-26	2810.53	0	0	0	0	0			2
1	1978-05-30	255	185	22	60	58	2810.53	0	2	4	8488.68		0	0	1978-05-26	2810.53	0	0	0	0	0			2
1	1978-06-02	285	210	22	60	59	2858.37	10	2	7	8633.06		47.8379	1.7021	1978-05-26	2810.53	0	0	0	0	10			2
1	1978-06-07	260	195	22	62	59	2955.25	30	2	12	8925.46		144.725	5.14938	1978-05-26	2810.53	0	0	15	0	15			3
1	1978-06-13	215	155	22	62	59	2955.25	100	2	18	8925.46		144.725	5.14938	1978-05-26	2810.53	0	0	50	0	50			3
1	1978-06-19	205	155	22	62	59	2955.25	100	3	24	8925.46		144.725	5.14938	1978-05-26	2810.53	0	0	50	0	50			3
1	1978-05-26	130	125	23	40	40	1291.83	0	2	0	3905.24		0	0	1978-05-26	1291.83	0	0	0	0	0			3
1	1978-05-30	255	185	23	40	40	1291.83	0	2	4	3905.24		0	0	1978-05-26	1291.83	0	0	0	0	0			3
1	1978-06-02	285	210	23	40	40	1291.83	0	2	7	3905.24		0	0	1978-05-26	1291.83	0	0	0	0	0			3
1	1978-06-07	260	195	23	40	40	1291.83	100	2	12	3905.24		0	0	1978-05-26	1291.83	0	0	0	0	100			3
1	1978-06-13	215	155	23	40	40	1291.83	100	2	18	3905.24		0	0	1978-05-26	1291.83	0	0	50	0	50			3
1	1978-06-19	205	155	23	40	40	1291.83	100	3	24	3905.24		0	0	1978-05-26	1291.83	0	0	50	0	50			3
1	1978-05-26	130	125	24	65	52	2763.09	0	2	0	8345.53		0	0	1978-05-26	2763.09	0	0	0	0	0			3
1	1978-05-30	255	185	24	65	52	2763.09	0	2	4	8345.53		0	0	1978-05-26	2763.09	0	0	0	0	0			3
1	1978-06-02	285	210	24	66	53	2858.37	0	2	7	8633.06		95.2722	3.44802	1978-05-26	2763.09	0	0	0	0	0			3
1	1978-06-07	260	195	24	66	53	2858.37	0	2	12	8633.06		95.2722	3.44802	1978-05-26	2763.09	0	0	0	0	0			3
1	1978-06-13	215	155	24	66	57	3053.76	5	2	18	9222.74		290.661	10.5194	1978-05-26	2763.09	0	0	0	0	5			3
1	1978-06-19	205	155	24	66	57	3053.76	100	2	24	9222.74		290.661	10.5194	1978-05-26	2763.09	0	0	30	0	70			3
1	1978-06-23	190	170	24	66	57	3053.76	100	3	28	9222.74		290.661	10.5194	1978-05-26	2763.09	0	0	30	0	70			3
1	1978-05-26	130	125	25	63	54	2763.09	0	2	0	8345.53		0	0	1978-05-26	2763.09	0	0	0	0	0			3
1	1978-05-30	255	185	25	64	54	2810.53	0	2	4	8488.68		47.4342	1.71671	1978-05-26	2763.09	0	0	0	0	0			3
1	1978-06-02	285	210	25	65	54	2858.37	0	2	7	8633.06		95.2722	3.44802	1978-05-26	2763.09	0	0	0	0	0			3
1	1978-06-07	260	195	25	65	56	2955.25	1	2	12	8925.46		192.159	6.95449	1978-05-26	2763.09	0	0	0	0	1			3
1	1978-06-13	215	155	25	65	61	3204.54	2	2	18	9677.79		441.441	15.9763	1978-05-26	2763.09	0	0	0	0	2			3
1	1978-06-19	205	155	25	66	61	3255.6	15	2	24	9831.92		492.509	17.8245	1978-05-26	2763.09	0	0	0	0	15			3
1	1978-06-23	190	170	25	66	61	3255.6	50	2	28	9831.92		492.509	17.8245	1978-05-26	2763.09	0	0	20	0	30			3
1	1978-06-25	190	140	25	66	61	3255.6	50	3	30	9831.92		492.509	17.8245	1978-05-26	2763.09	0	0	20	0	30			3
1	1978-05-26	130	125	26	34	30	826.769	0	2	0	2501.69		0	0	1978-05-26	826.769	0	0	0	0	0			3
1	1978-05-30	255	185	26	35	31	879.249	0	2	4	2660.08		52.4804	6.34766	1978-05-26	826.769	0	0	0	0	0			3
1	1978-06-02	285	210	26	35	32	906.095	30	2	7	2741.1		79.3262	9.59473	1978-05-26	826.769	0	0	0	0	30			3
1	1978-06-07	260	195	26	35	32	906.095	30	3	12	2741.1		79.3262	9.59473	1978-05-26	826.769	0	0	0	0	30			3
1	1978-05-26	130	125	27	42	42	1424.24	0	2	0	4304.86		0	0	1978-05-26	1424.24	0	0	0	0	0			3
1	1978-05-30	255	185	27	42	42	1424.24	0	2	4	4304.86		0	0	1978-05-26	1424.24	0	0	0	0	0			3
1	1978-06-02	285	210	27	42	43	1458.35	10	2	7	4407.81		34.1123	2.39512	1978-05-26	1424.24	0	0	0	0	10			3
1	1978-06-07	260	195	27	42	45	1527.79	15	2	12	4617.36		103.548	7.27041	1978-05-26	1424.24	0	0	0	0	15			3
1	1978-06-13	215	155	27	43	45	1563.11	100	2	18	4723.97		138.871	9.75057	1978-05-26	1424.24	0	0	80	0	20			3
1	1978-06-19	205	155	27	43	45	1563.11	100	3	24	4723.97		138.871	9.75057	1978-05-26	1424.24	0	0	80	0	20			3
1	1978-05-26	130	125	28	29	31	726.652	100	2	0	2199.54		0	0	1978-05-26	726.652	0	0	0	0	100			3
1	1978-05-30	255	185	28	29	31	726.652	100	2	4	2199.54		0	0	1978-05-26	726.652	0	0	60	0	40			3
1	1978-06-02	285	210	28	29	31	726.652	100	3	7	2199.54		0	0	1978-05-26	726.652	0	0	60	0	40			3
1	1978-05-26	130	125	29	28	21	484.637	0	2	0	1469.14		0	0	1978-05-26	484.637	0	0	0	0	0			3
1	1978-05-30	255	185	29	28	21	484.637	0	3	4	1469.14		0	0	1978-05-26	484.637	0	0	0	0	0			3
1	1978-05-26	130	125	30	51	46	1899.19	0	2	0	5738.25		0	0	1978-05-26	1899.19	0	0	0	0	0			3
1	1978-05-30	255	185	30	51	46	1899.19	0	2	4	5738.25		0	0	1978-05-26	1899.19	0	0	0	0	0			3
1	1978-06-02	285	210	30	51	46	1899.19	0	2	7	5738.25		0	0	1978-05-26	1899.19	0	0	0	0	0			3
1	1978-06-07	260	195	30	51	46	1899.19	0	2	12	5738.25		0	0	1978-05-26	1899.19	0	0	0	0	0			3
1	1978-06-13	215	155	30	51	49	2018.48	20	2	18	6098.27		119.292	6.28122	1978-05-26	1899.19	0	0	0	0	20			3
1	1978-06-19	205	155	30	51	49	2018.48	100	2	24	6098.27		119.292	6.28122	1978-05-26	1899.19	0	0	0	0	100			3
1	1978-06-23	190	170	30	51	49	2018.48	100	3	28	6098.27		119.292	6.28122	1978-05-26	1899.19	0	0	0	0	100			3
1	1978-05-26	130	125	31	78	70	4421.27	0	2	0	13349.9		0	0	1978-05-26	4421.27	0	0	0	0	0			3
1	1978-05-30	255	185	31	78	70	4421.27	0	2	4	13349.9		0	0	1978-05-26	4421.27	0	0	0	0	0			3
1	1978-06-02	285	210	31	78	71	4481.22	0	2	7	13530.8		59.9488	1.35592	1978-05-26	4421.27	0	0	0	0	0			3
1	1978-06-07	260	195	31	78	71	4481.22	30	2	12	13530.8		59.9488	1.35592	1978-05-26	4421.27	0	0	0	0	30			3
1	1978-06-13	215	155	31	79	72	4602.33	65	2	18	13896.3		181.057	4.09514	1978-05-26	4421.27	0	0	5	0	60			3
1	1978-06-19	205	155	31	79	72	4602.33	65	3	24	13896.3		181.057	4.09514	1978-05-26	4421.27	0	0	5	0	60			3
1	1978-05-26	130	125	32	30	31	751.076	100	2	0	2273.25		0	0	1978-05-26	751.076	0	0	0	0	100			3
1	1978-05-30	255	185	32	30	31	751.076	100	2	4	2273.25		0	0	1978-05-26	751.076	0	0	25	0	75			3
1	1978-06-02	285	210	32	30	31	751.076	100	3	7	2273.25		0	0	1978-05-26	751.076	0	0	25	0	75			3
1	1978-05-26	130	125	33	47	47	1783.53	0	2	0	5389.19		0	0	1978-05-26	1783.53	0	0	0	0	0			3
1	1978-05-30	255	185	33	47	47	1783.53	0	2	4	5389.19		0	0	1978-05-26	1783.53	0	0	0	0	0			3
1	1978-06-02	285	210	33	47	47	1783.53	5	2	7	5389.19		0	0	1978-05-26	1783.53	0	0	0	0	5			3
1	1978-06-07	260	195	33	47	47	1783.53	5	3	12	5389.19		0	0	1978-05-26	1783.53	0	0	0	0	5			3
1	1978-05-26	130	125	34	56	50	2267.96	0	2	0	6851.21		0	0	1978-05-26	2267.96	0	0	0	0	0			3
1	1978-05-30	255	185	34	57	50	2310.96	0	2	4	6980.97		42.9936	1.89569	1978-05-26	2267.96	0	0	0	0	0			3
1	1978-06-02	285	210	34	58	51	2398.15	0	2	7	7244.13		130.192	5.74048	1978-05-26	2267.96	0	0	0	0	0			4
1	1978-06-07	260	195	34	58	54	2531.98	0	2	12	7648.02		264.017	11.6412	1978-05-26	2267.96	0	0	0	0	0			4
1	1978-06-13	215	155	34	61	55	2716.06	0	2	18	8203.59		448.102	19.7579	1978-05-26	2267.96	0	0	0	0	0			4
1	1978-06-19	205	155	34	61	55	2716.06	70	2	24	8203.59		448.102	19.7579	1978-05-26	2267.96	0	0	0	0	70			4
1	1978-06-23	190	170	34	61	55	2716.06	100	2	28	8203.59		448.102	19.7579	1978-05-26	2267.96	0	0	50	0	50			4
1	1978-06-25	190	140	34	61	55	2716.06	100	3	30	8203.59		448.102	19.7579	1978-05-26	2267.96	0	0	50	0	50			4
1	1978-05-26	130	125	35	63	65	3307.07	0	2	0	9987.26		0	0	1978-05-26	3307.07	0	0	0	0	0			4
1	1978-05-30	255	185	35	63	65	3307.07	0	2	4	9987.26		0	0	1978-05-26	3307.07	0	0	0	0	0			4
1	1978-06-02	285	210	35	63	65	3307.07	0	2	7	9987.26		0	0	1978-05-26	3307.07	0	0	0	0	0			4
1	1978-06-07	260	195	35	63	65	3307.07	20	2	12	9987.26		0	0	1978-05-26	3307.07	0	0	0	0	20			4
1	1978-06-13	215	155	35	63	65	3307.07	62	2	18	9987.26		0	0	1978-05-26	3307.07	0	0	2	0	60			4
1	1978-06-19	205	155	35	63	65	3307.07	100	2	24	9987.26		0	0	1978-05-26	3307.07	0	20	50	0	30			4
1	1978-06-23	190	170	35	63	65	3307.07	100	3	28	9987.26		0	0	1978-05-26	3307.07	0	20	50	0	30			4
1	1978-05-26	130	125	36	25	25	504.62	100	2	0	1529.45		0	0	1978-05-26	504.62	0	0	0	0	100			4
1	1978-05-30	255	185	36	25	25	504.62	100	3	4	1529.45		0	0	1978-05-26	504.62	0	0	0	0	100			4
1	1978-05-26	130	125	37	56	54	2442.36	0	2	0	7377.54		0	0	1978-05-26	2442.36	0	0	0	0	0			4
1	1978-05-30	255	185	37	56	54	2442.36	0	2	4	7377.54		0	0	1978-05-26	2442.36	0	0	0	0	0			4
1	1978-06-02	285	210	37	56	55	2486.97	0	2	7	7512.17		44.6084	1.82645	1978-05-26	2442.36	0	0	0	0	0			4
1	1978-06-07	260	195	37	59	55	2623.21	0	2	12	7923.37		180.856	7.40496	1978-05-26	2442.36	0	0	0	0	0			4
1	1978-06-13	215	155	37	59	57	2716.06	100	2	18	8203.59		273.706	11.2066	1978-05-26	2442.36	0	0	0	0	100			4
1	1978-06-19	205	155	37	59	57	2716.06	100	2	24	8203.59		273.706	11.2066	1978-05-26	2442.36	0	0	50	0	50			4
1	1978-06-23	190	170	37	59	57	2716.06	100	3	28	8203.59		273.706	11.2066	1978-05-26	2442.36	0	0	50	0	50			4
1	1978-05-26	130	125	38	63	64	3255.6	0	2	0	9831.92		0	0	1978-05-26	3255.6	0	0	0	0	0			4
1	1978-05-30	255	185	38	63	64	3255.6	0	2	4	9831.92		0	0	1978-05-26	3255.6	0	0	0	0	0			4
1	1978-06-02	285	210	38	63	64	3255.6	0	2	7	9831.92		0	0	1978-05-26	3255.6	0	0	0	0	0			4
1	1978-06-07	260	195	38	63	64	3255.6	15	2	12	9831.92		0	0	1978-05-26	3255.6	0	0	0	0	15			4
1	1978-06-13	215	155	38	63	64	3255.6	100	2	18	9831.92		0	0	1978-05-26	3255.6	0	0	80	0	20			4
1	1978-06-19	205	155	38	63	64	3255.6	100	3	24	9831.92		0	0	1978-05-26	3255.6	0	0	80	0	20			4
1	1978-05-26	130	125	39	55	54	2398.15	0	2	0	7244.13		0	0	1978-05-26	2398.15	0	0	0	0	0			4
1	1978-05-30	255	185	39	55	54	2398.15	0	2	4	7244.13		0	0	1978-05-26	2398.15	0	0	0	0	0			4
1	1978-06-02	285	210	39	55	54	2398.15	40	2	7	7244.13		0	0	1978-05-26	2398.15	0	0	0	0	40			4
1	1978-06-07	260	195	39	55	54	2398.15	100	2	12	7244.13		0	0	1978-05-26	2398.15	0	0	25	0	75			4
1	1978-06-13	215	155	39	55	54	2398.15	100	3	18	7244.13		0	0	1978-05-26	2398.15	0	0	25	0	75			4
1	1978-05-26	130	125	40	53	54	2310.96	0	2	0	6980.97		0	0	1978-05-26	2310.96	0	0	0	0	0			4
1	1978-05-30	255	185	40	53	54	2310.96	0	2	4	6980.97		0	0	1978-05-26	2310.96	0	0	0	0	0			4
1	1978-06-02	285	210	40	53	55	2354.35	25	2	7	7111.94		43.3973	1.87789	1978-05-26	2310.96	0	0	0	0	25			4
1	1978-06-07	260	195	40	53	55	2354.35	70	2	12	7111.94		43.3973	1.87789	1978-05-26	2310.96	0	0	30	0	40			4
1	1978-06-13	215	155	40	53	55	2354.35	70	3	18	7111.94		43.3973	1.87789	1978-05-26	2310.96	0	0	30	0	40			4
1	1978-05-26	130	125	41	48	45	1745.78	0	2	0	5275.27		0	0	1978-05-26	1745.78	0	0	0	0	0			4
1	1978-05-30	255	185	41	48	45	1745.78	0	2	4	5275.27		0	0	1978-05-26	1745.78	0	0	0	0	0			4
1	1978-06-02	285	210	41	48	46	1783.53	20	2	7	5389.19		37.7455	2.1621	1978-05-26	1745.78	0	0	0	0	20			4
1	1978-06-07	260	195	41	48	46	1783.53	20	3	12	5389.19		37.7455	2.1621	1978-05-26	1745.78	0	0	0	0	20			4
1	1978-05-26	130	125	42	45	45	1634.97	0	2	0	4940.84		0	0	1978-05-26	1634.97	0	0	0	0	0			4
1	1978-05-30	255	185	42	45	45	1634.97	0	2	4	4940.84		0	0	1978-05-26	1634.97	0	0	0	0	0			4
1	1978-06-02	285	210	42	45	45	1634.97	0	2	7	4940.84		0	0	1978-05-26	1634.97	0	0	0	0	0			4
1	1978-06-07	260	195	42	45	45	1634.97	5	2	12	4940.84		0	0	1978-05-26	1634.97	0	0	0	0	5			4
1	1978-06-13	215	155	42	45	45	1634.97	5	3	18	4940.84		0	0	1978-05-26	1634.97	0	0	0	0	5			4
1	1978-05-26	130	125	43	68	59	3255.6	0	2	0	9831.92		0	0	1978-05-26	3255.6	0	0	0	0	0			4
1	1978-05-30	255	185	43	69	60	3358.95	0	2	4	10143.8		103.346	3.17441	1978-05-26	3255.6	0	0	0	0	0			4
1	1978-06-02	285	210	43	70	60	3411.23	0	2	7	10301.6		155.625	4.78021	1978-05-26	3255.6	0	0	0	0	0			4
1	1978-06-07	260	195	43	70	61	3463.91	0	2	12	10460.6		208.307	6.39841	1978-05-26	3255.6	0	0	0	0	0			4
1	1978-06-13	215	155	43	72	64	3733.38	10	2	18	11273.8		477.774	14.6754	1978-05-26	3255.6	0	0	0	0	10			4
1	1978-06-19	205	155	43	72	64	3733.38	20	2	24	11273.8		477.774	14.6754	1978-05-26	3255.6	0	0	10	0	10			4
1	1978-06-23	190	170	43	72	64	3733.38	100	2	28	11273.8		477.774	14.6754	1978-05-26	3255.6	0	0	30	0	70			4
1	1978-06-25	190	140	43	72	64	3733.38	100	3	30	11273.8		477.774	14.6754	1978-05-26	3255.6	0	0	30	0	70			4
1	1978-05-26	130	125	44	66	59	3153.87	0	2	0	9524.89		0	0	1978-05-26	3153.87	0	0	0	0	0			4
1	1978-05-30	255	185	44	71	63	3624.38	0	2	4	10944.9		470.507	14.9184	1978-05-26	3153.87	0	0	0	0	0			4
1	1978-06-02	285	210	44	75	67	4070.06	0	2	7	12289.9		916.187	29.0496	1978-05-26	3153.87	0	0	0	0	0			4
1	1978-06-07	260	195	44	75	67	4070.06	30	2	12	12289.9		916.187	29.0496	1978-05-26	3153.87	0	0	0	0	30			4
1	1978-06-13	215	155	44	75	69	4185.52	70	2	18	12638.4		1031.64	32.7104	1978-05-26	3153.87	0	0	0	0	70			4
1	1978-06-19	205	155	44	75	69	4185.52	100	2	24	12638.4		1031.64	32.7104	1978-05-26	3153.87	0	10	60	0	30			4
1	1978-06-23	190	170	44	75	69	4185.52	100	3	28	12638.4		1031.64	32.7104	1978-05-26	3153.87	0	10	60	0	30			5
1	1978-05-26	130	125	45	51	50	2059.05	0	2	0	6220.72		0	0	1978-05-26	2059.05	0	0	0	0	0			5
1	1978-05-30	255	185	45	51	50	2059.05	0	2	4	6220.72		0	0	1978-05-26	2059.05	0	0	0	0	0			5
1	1978-06-02	285	210	45	51	51	2100.02	0	2	7	6344.38		40.9751	1.99	1978-05-26	2059.05	0	0	0	0	0			5
1	1978-06-07	260	195	45	51	51	2100.02	0	2	12	6344.38		40.9751	1.99	1978-05-26	2059.05	0	0	0	0	0			5
1	1978-06-13	215	155	45	51	51	2100.02	0	2	18	6344.38		40.9751	1.99	1978-05-26	2059.05	0	0	0	0	0			5
1	1978-06-19	205	155	45	51	51	2100.02	15	2	24	6344.38		40.9751	1.99	1978-05-26	2059.05	0	0	0	0	15			5
1	1978-06-23	190	170	45	51	51	2100.02	100	2	28	6344.38		40.9751	1.99	1978-05-26	2059.05	0	0	10	0	90			5
1	1978-06-25	190	140	45	51	51	2100.02	100	2	30	6344.38		40.9751	1.99	1978-05-26	2059.05	0	0	30	0	70			5
1	1978-06-30	210	170	45	51	51	2100.02	100	3	35	6344.38		40.9751	1.99	1978-05-26	2059.05	0	0	30	0	70			5
1	1978-05-26	130	125	46	74	70	4185.52	0	2	0	12638.4		0	0	1978-05-26	4185.52	0	0	0	0	0			5
1	1978-05-30	255	185	46	76	71	4361.73	0	2	4	13170.2		176.213	4.21007	1978-05-26	4185.52	0	0	0	0	0			5
1	1978-06-02	285	210	46	78	74	4663.49	0	2	7	14080.9		477.976	11.4198	1978-05-26	4185.52	0	0	0	0	0			5
1	1978-06-07	260	195	46	78	75	4725.06	0	2	12	14266.7		539.539	12.8906	1978-05-26	4185.52	0	0	0	0	0			5
1	1978-06-13	215	155	46	80	75	4849.39	80	2	18	14642		663.877	15.8613	1978-05-26	4185.52	0	0	0	0	80			5
1	1978-06-19	205	155	46	80	75	4849.39	100	2	24	14642		663.877	15.8613	1978-05-26	4185.52	0	10	60	0	30			5
1	1978-06-23	190	170	46	80	75	4849.39	100	3	28	14642		663.877	15.8613	1978-05-26	4185.52	0	10	60	0	30			5
1	1978-05-26	130	125	47	70	62	3517	0	2	0	10620.8		0	0	1978-05-26	3517	0	0	0	0	0			5
1	1978-05-30	255	185	47	71	62	3570.49	0	2	4	10782.2		53.4897	1.52089	1978-05-26	3517	0	0	0	0	0			5
1	1978-06-02	285	210	47	72	63	3678.68	0	2	7	11108.8		161.68	4.59711	1978-05-26	3517	0	0	0	0	0			5
1	1978-06-07	260	195	47	86	75	5232.1	0	2	12	15797		1715.1	48.7661	1978-05-26	3517	0	0	0	0	0			5
1	1978-06-13	215	155	47	88	77	5495.31	60	2	18	16591.3		1978.31	56.25	1978-05-26	3517	0	0	0	0	60			5
1	1978-06-19	205	155	47	88	77	5495.31	100	2	24	16591.3		1978.31	56.25	1978-05-26	3517	0	0	0	0	100			5
1	1978-06-23	190	170	47	88	77	5495.31	100	3	28	16591.3		1978.31	56.25	1978-05-26	3517	0	0	0	0	100			5
1	1978-05-26	130	125	48	67	60	3255.6	0	2	0	9831.92		0	0	1978-05-26	3255.6	0	0	0	0	0			5
1	1978-05-30	255	185	48	77	68	4243.85	0	2	4	12814.4		988.247	30.3553	1978-05-26	3255.6	0	0	0	0	0			5
1	1978-06-02	285	210	48	77	68	4243.85	0	2	7	12814.4		988.247	30.3553	1978-05-26	3255.6	0	0	0	0	0			5
1	1978-06-07	260	195	48	78	70	4421.27	30	2	12	13349.9		1165.67	35.8051	1978-05-26	3255.6	0	0	0	0	30			5
1	1978-06-13	215	155	48	79	71	4541.58	40	2	18	13713		1285.97	39.5003	1978-05-26	3255.6	0	0	0	0	40			5
1	1978-06-19	205	155	48	79	71	4541.58	100	2	24	13713		1285.97	39.5003	1978-05-26	3255.6	0	0	0	0	100			5
1	1978-06-23	190	170	48	79	71	4541.58	100	2	28	13713		1285.97	39.5003	1978-05-26	3255.6	0	0	10	0	90			5
1	1978-06-25	190	140	48	79	71	4541.58	100	3	30	13713		1285.97	39.5003	1978-05-26	3255.6	0	0	10	0	90			5
1	1978-05-26	130	125	49	57	54	2486.97	0	2	0	7512.17		0	0	1978-05-26	2486.97	0	0	0	0	0			5
1	1978-05-30	255	185	49	57	54	2486.97	0	2	4	7512.17		0	0	1978-05-26	2486.97	0	0	0	0	0			5
1	1978-06-02	285	210	49	58	54	2531.98	0	2	7	7648.02		45.0121	1.80992	1978-05-26	2486.97	0	0	0	0	0			5
1	1978-06-07	260	195	49	60	54	2623.21	0	2	12	7923.37		136.247	5.47845	1978-05-26	2486.97	0	0	0	0	0			5
1	1978-06-13	215	155	49	60	54	2623.21	20	2	18	7923.37		136.247	5.47845	1978-05-26	2486.97	0	0	0	0	20			5
1	1978-06-19	205	155	49	60	54	2623.21	20	3	24	7923.37		136.247	5.47845	1978-05-26	2486.97	0	0	0	0	20			5
1	1978-05-26	130	125	50	87	78	5495.31	0	2	0	16591.3		0	0	1978-05-26	5495.31	0	0	0	0	0			5
1	1978-05-30	255	185	50	87	78	5495.31	0	2	4	16591.3		0	0	1978-05-26	5495.31	0	0	0	0	0			5
1	1978-06-02	285	210	50	87	78	5495.31	0	2	7	16591.3		0	0	1978-05-26	5495.31	0	0	0	0	0			5
1	1978-06-07	260	195	50	89	82	5902.23	0	2	12	17819.4		406.925	7.40496	1978-05-26	5495.31	0	0	0	0	0			5
1	1978-06-13	215	155	50	92	83	6181.59	0	2	18	18662.5		686.283	12.4885	1978-05-26	5495.31	0	0	0	0	0			5
1	1978-06-19	205	155	50	92	83	6181.59	10	2	24	18662.5		686.283	12.4885	1978-05-26	5495.31	0	0	0	0	10			5
1	1978-06-23	190	170	50	92	83	6181.59	100	2	28	18662.5		686.283	12.4885	1978-05-26	5495.31	0	0	0	0	100			5
1	1978-06-25	190	140	50	92	83	6181.59	100	2	30	18662.5		686.283	12.4885	1978-05-26	5495.31	0	0	30	0	70			5
1	1978-06-30	210	170	50	92	83	6181.59	100	3	35	18662.5		686.283	12.4885	1978-05-26	5495.31	0	0	30	0	70			5
1	1978-05-26	130	125	51	78	66	4185.52	0	2	0	12638.4		0	0	1978-05-26	4185.52	0	0	0	0	0			5
1	1978-05-30	255	185	51	79	68	4361.73	0	2	4	13170.2		176.213	4.21007	1978-05-26	4185.52	0	0	0	0	0			5
1	1978-06-02	285	210	51	79	68	4361.73	0	2	7	13170.2		176.213	4.21007	1978-05-26	4185.52	0	0	0	0	0			5
1	1978-06-07	260	195	51	84	73	4975.35	2	2	12	15022.1		789.83	18.8706	1978-05-26	4185.52	0	0	0	0	2			5
1	1978-06-13	215	155	51	84	73	4975.35	2	2	18	15022.1		789.83	18.8706	1978-05-26	4185.52	0	0	0	0	2			5
1	1978-06-19	205	155	51	84	73	4975.35	100	2	24	15022.1		789.83	18.8706	1978-05-26	4185.52	0	0	0	0	100			5
1	1978-06-23	190	170	51	84	73	4975.35	100	3	28	15022.1		789.83	18.8706	1978-05-26	4185.52	0	0	0	0	100			5
1	1978-05-26	130	125	52	66	65	3463.91	0	2	0	10460.6		0	0	1978-05-26	3463.91	0	0	0	0	0			5
1	1978-05-30	255	185	52	66	65	3463.91	0	2	4	10460.6		0	0	1978-05-26	3463.91	0	0	0	0	0			5
1	1978-06-02	285	210	52	66	65	3463.91	0	2	7	10460.6		0	0	1978-05-26	3463.91	0	0	0	0	0			5
1	1978-06-07	260	195	52	66	65	3463.91	10	2	12	10460.6		0	0	1978-05-26	3463.91	0	0	0	0	10			5
1	1978-06-13	215	155	52	66	65	3463.91	100	2	18	10460.6		0	0	1978-05-26	3463.91	0	0	60	0	40			5
1	1978-06-19	205	155	52	66	65	3463.91	100	3	24	10460.6		0	0	1978-05-26	3463.91	0	0	60	0	40			5
1	1978-05-26	130	125	53	85	75	5167.3	0	2	0	15601.4		0	0	1978-05-26	5167.3	0	0	0	0	0			5
1	1978-05-30	255	185	53	86	77	5362.89	0	2	4	16191.7		195.591	3.78516	1978-05-26	5167.3	0	0	0	0	0			6
1	1978-06-02	285	210	53	88	79	5629.33	0	2	7	16995.8		462.03	8.94141	1978-05-26	5167.3	0	0	0	0	0			6
1	1978-06-07	260	195	53	90	82	5971.47	0	2	12	18028.4		804.162	15.5625	1978-05-26	5167.3	0	0	0	0	0			6
1	1978-06-13	215	155	53	92	82	6111.14	0	2	18	18449.9		943.84	18.2656	1978-05-26	5167.3	0	0	0	0	0			6
1	1978-06-19	205	155	53	92	82	6111.14	25	2	24	18449.9		943.84	18.2656	1978-05-26	5167.3	0	0	0	0	25			6
1	1978-06-23	190	170	53	92	82	6111.14	100	2	28	18449.9		943.84	18.2656	1978-05-26	5167.3	0	0	10	0	90			6
1	1978-06-25	190	140	53	92	82	6111.14	100	3	30	18449.9		943.84	18.2656	1978-05-26	5167.3	0	0	10	0	90			6
1	1978-05-26	130	125	54	50	54	2183.19	0	2	0	6595.36		0	0	1978-05-26	2183.19	0	0	0	0	0			6
1	1978-05-30	255	185	54	50	54	2183.19	20	2	4	6595.36		0	0	1978-05-26	2183.19	0	0	0	0	20			6
1	1978-06-02	285	210	54	51	54	2225.37	100	2	7	6722.68		42.1862	1.93232	1978-05-26	2183.19	0	0	0	0	100			6
1	1978-06-07	260	195	54	51	54	2225.37	100	3	12	6722.68		42.1862	1.93232	1978-05-26	2183.19	0	0	0	0	100			6
1	1978-05-26	130	125	55	72	72	4185.52	0	2	0	12638.4		0	0	1978-05-26	4185.52	0	0	0	0	0			6
1	1978-05-30	255	185	55	72	72	4185.52	0	2	4	12638.4		0	0	1978-05-26	4185.52	0	0	0	0	0			6
1	1978-06-02	285	210	55	72	72	4185.52	0	2	7	12638.4		0	0	1978-05-26	4185.52	0	0	0	0	0			6
1	1978-06-07	260	195	55	73	72	4243.85	0	2	12	12814.4		58.334	1.39371	1978-05-26	4185.52	0	0	0	0	0			6
1	1978-06-13	215	155	55	73	72	4243.85	20	2	18	12814.4		58.334	1.39371	1978-05-26	4185.52	0	0	0	0	20			6
1	1978-06-19	205	155	55	73	72	4243.85	90	2	24	12814.4		58.334	1.39371	1978-05-26	4185.52	0	0	0	0	90			6
1	1978-06-23	190	170	55	73	72	4243.85	100	2	28	12814.4		58.334	1.39371	1978-05-26	4185.52	0	0	60	0	40			6
1	1978-06-25	190	140	55	73	72	4243.85	100	3	30	12814.4		58.334	1.39371	1978-05-26	4185.52	0	0	60	0	40			6
1	1978-05-26	130	125	56	49	49	1938.55	0	2	0	5857.04		0	0	1978-05-26	1938.55	0	0	0	0	0			6
1	1978-05-30	255	185	56	49	49	1938.55	0	2	4	5857.04		0	0	1978-05-26	1938.55	0	0	0	0	0			6
1	1978-06-02	285	210	56	49	49	1938.55	100	2	7	5857.04		0	0	1978-05-26	1938.55	0	0	0	0	100			6
1	1978-06-07	260	195	56	49	49	1938.55	100	3	12	5857.04		0	0	1978-05-26	1938.55	0	0	0	0	100			6
1	1978-05-26	130	125	57	35	33	933.344	0	2	0	2823.34		0	0	1978-05-26	933.344	0	0	0	0	0			6
1	1978-05-30	255	185	57	35	33	933.344	0	3	4	2823.34		0	0	1978-05-26	933.344	0	0	0	0	0			6
1	1978-05-26	130	125	58	37	38	1135.39	0	2	0	3433.12		0	0	1978-05-26	1135.39	0	0	0	0	0			6
1	1978-05-30	255	185	58	37	38	1135.39	0	2	4	3433.12		0	0	1978-05-26	1135.39	0	0	0	0	0			6
1	1978-06-02	285	210	58	37	38	1135.39	100	2	7	3433.12		0	0	1978-05-26	1135.39	0	0	0	0	100			6
1	1978-06-07	260	195	58	37	38	1135.39	100	3	12	3433.12		0	0	1978-05-26	1135.39	0	0	0	0	100			6
1	1978-05-26	130	125	59	71	66	3788.48	0	2	0	11440.1		0	0	1978-05-26	3788.48	0	0	0	0	0			6
1	1978-05-30	255	185	59	72	67	3899.9	0	2	4	11776.4		111.42	2.94102	1978-05-26	3788.48	0	0	0	0	0			6
1	1978-06-02	285	210	59	73	69	4070.06	0	2	7	12289.9		281.578	7.43247	1978-05-26	3788.48	0	0	0	0	0			6
1	1978-06-07	260	195	59	74	69	4127.59	0	2	12	12463.6		339.104	8.95093	1978-05-26	3788.48	0	0	0	0	0			6
1	1978-06-13	215	155	59	75	70	4243.85	0	2	18	12814.4		455.369	12.0198	1978-05-26	3788.48	0	0	0	0	0			6
1	1978-06-19	205	155	59	75	70	4243.85	5	2	24	12814.4		455.369	12.0198	1978-05-26	3788.48	0	0	0	0	5			6
1	1978-06-23	190	170	59	75	70	4243.85	40	2	28	12814.4		455.369	12.0198	1978-05-26	3788.48	0	0	0	0	40			6
1	1978-06-25	190	140	59	75	70	4243.85	100	2	30	12814.4		455.369	12.0198	1978-05-26	3788.48	0	10	50	0	40			6
1	1978-06-30	210	170	59	75	70	4243.85	100	3	35	12814.4		455.369	12.0198	1978-05-26	3788.48	0	10	50	0	40			6
1	1978-05-26	130	125	60	58	55	2577.39	0	2	0	7785.08		0	0	1978-05-26	2577.39	0	0	0	0	0			6
1	1978-05-30	255	185	60	58	55	2577.39	0	2	4	7785.08		0	0	1978-05-26	2577.39	0	0	0	0	0			6
1	1978-06-02	285	210	60	58	56	2623.21	0	2	7	7923.37		45.8195	1.77774	1978-05-26	2577.39	0	0	0	0	0			6
1	1978-06-07	260	195	60	59	55	2623.21	0	2	12	7923.37		45.8195	1.77774	1978-05-26	2577.39	0	0	0	0	0			6
1	1978-06-13	215	155	60	59	55	2623.21	0	2	18	7923.37		45.8195	1.77774	1978-05-26	2577.39	0	0	0	0	0			6
1	1978-06-19	205	155	60	59	55	2623.21	100	2	24	7923.37		45.8195	1.77774	1978-05-26	2577.39	0	0	0	0	100			6
1	1978-06-23	190	170	60	59	55	2623.21	100	3	28	7923.37		45.8195	1.77774	1978-05-26	2577.39	0	0	0	0	100			6
1	1978-05-26	130	125	61	55	52	2310.96	0	2	0	6980.97		0	0	1978-05-26	2310.96	0	0	0	0	0			6
1	1978-05-30	255	185	61	55	52	2310.96	0	2	4	6980.97		0	0	1978-05-26	2310.96	0	0	0	0	0			6
1	1978-06-02	285	210	61	55	52	2310.96	0	2	7	6980.97		0	0	1978-05-26	2310.96	0	0	0	0	0			6
1	1978-06-07	260	195	61	55	52	2310.96	0	2	12	6980.97		0	0	1978-05-26	2310.96	0	0	0	0	0			6
1	1978-06-13	215	155	61	55	52	2310.96	100	2	18	6980.97		0	0	1978-05-26	2310.96	0	0	0	0	100			6
1	1978-06-19	205	155	61	55	52	2310.96	100	2	24	6980.97		0	0	1978-05-26	2310.96	0	0	40	0	60			6
1	1978-06-23	190	170	61	55	52	2310.96	100	3	28	6980.97		0	0	1978-05-26	2310.96	0	0	40	0	60			6
1	1978-05-26	130	125	62	20	25	408.742	100	2	0	1240.09		0	0	1978-05-26	408.742	0	0	0	0	100			6
1	1978-05-30	255	185	62	20	25	408.742	100	3	4	1240.09		0	0	1978-05-26	408.742	0	0	0	0	100			6
1	1978-05-26	130	125	63	66	58	3103.61	0	2	0	9373.21		0	0	1978-05-26	3103.61	0	0	0	0	0			6
1	1978-05-30	255	185	63	67	59	3204.54	0	2	4	9677.79		100.924	3.25182	1978-05-26	3103.61	0	0	0	0	0			6
1	1978-06-02	285	210	63	71	63	3624.38	0	2	7	10944.9		520.767	16.7794	1978-05-26	3103.61	0	0	0	0	0			6
1	1978-06-07	260	195	63	70	63	3570.49	0	2	12	10782.2		466.874	15.0429	1978-05-26	3103.61	0	0	0	0	0			6
1	1978-06-13	215	155	63	72	64	3733.38	0	2	18	11273.8		629.765	20.2914	1978-05-26	3103.61	0	0	0	0	0			6
1	1978-06-19	205	155	63	72	64	3733.38	100	2	24	11273.8		629.765	20.2914	1978-05-26	3103.61	0	0	0	0	100			6
1	1978-06-23	190	170	63	72	64	3733.38	100	2	28	11273.8		629.765	20.2914	1978-05-26	3103.61	0	0	0	0	100			6
1	1978-06-25	190	140	63	72	64	3733.38	100	3	30	11273.8		629.765	20.2914	1978-05-26	3103.61	0	0	0	0	100			7
1	1978-05-26	130	125	64	43	42	1458.35	0	2	0	4407.81		0	0	1978-05-26	1458.35	0	0	0	0	0			7
1	1978-05-30	255	185	64	43	42	1458.35	100	2	4	4407.81		0	0	1978-05-26	1458.35	0	0	0	0	100			7
1	1978-06-02	285	210	64	43	42	1458.35	100	3	7	4407.81		0	0	1978-05-26	1458.35	0	0	0	0	100			7
1	1978-05-26	130	125	65	42	44	1492.87	0	2	0	4511.98		0	0	1978-05-26	1492.87	0	0	0	0	0			7
1	1978-05-30	255	185	65	42	44	1492.87	0	2	4	4511.98		0	0	1978-05-26	1492.87	0	0	0	0	0			7
1	1978-06-02	285	210	65	42	44	1492.87	30	2	7	4511.98		0	0	1978-05-26	1492.87	0	0	0	0	30			7
1	1978-06-07	260	195	65	42	44	1492.87	45	2	12	4511.98		0	0	1978-05-26	1492.87	0	0	25	0	20			7
1	1978-06-13	215	155	65	42	44	1492.87	45	3	18	4511.98		0	0	1978-05-26	1492.87	0	0	25	0	20			7
1	1978-05-30	255	185	66	73	59	3517	0	1	0	10620.8		0	0	1978-05-30	3517	0	0	0	0	0			7
1	1978-06-02	285	210	66	76	71	4361.73	0	2	3	13170.2		844.733	24.0186	1978-05-30	3517	0	0	0	0	0			7
1	1978-06-07	260	195	66	78	75	4725.06	0	2	8	14266.7		1208.06	34.3492	1978-05-30	3517	0	0	0	0	0			7
1	1978-06-13	215	155	66	79	77	4912.17	0	2	14	14831.4		1395.17	39.6694	1978-05-30	3517	0	0	0	0	0			7
1	1978-06-19	205	155	66	79	77	4912.17	0	2	20	14831.4		1395.17	39.6694	1978-05-30	3517	0	0	0	0	0			7
1	1978-06-23	190	170	66	79	77	4912.17	10	2	24	14831.4		1395.17	39.6694	1978-05-30	3517	0	0	0	0	10			7
1	1978-06-25	190	140	66	79	77	4912.17	100	2	26	14831.4		1395.17	39.6694	1978-05-30	3517	0	0	30	0	70			7
1	1978-06-30	210	170	66	79	77	4912.17	100	3	31	14831.4		1395.17	39.6694	1978-05-30	3517	0	0	30	0	70			7
1	1978-05-30	255	185	67	67	64	3463.91	0	1	0	10460.6		0	0	1978-05-30	3463.91	0	0	0	0	0			7
1	1978-06-02	285	210	67	71	71	4070.06	0	2	3	12289.9		606.149	17.499	1978-05-30	3463.91	0	0	0	0	0			7
1	1978-06-07	260	195	67	71	71	4070.06	0	2	8	12289.9		606.149	17.499	1978-05-30	3463.91	0	0	0	0	0			7
1	1978-06-13	215	155	67	72	72	4185.52	0	2	14	12638.4		721.606	20.8321	1978-05-30	3463.91	0	0	0	0	0			7
1	1978-06-19	205	155	67	72	72	4185.52	0	2	20	12638.4		721.606	20.8321	1978-05-30	3463.91	0	0	0	0	0			7
1	1978-06-23	190	170	67	72	72	4185.52	25	2	24	12638.4		721.606	20.8321	1978-05-30	3463.91	0	0	0	0	25			7
1	1978-06-25	190	140	67	72	72	4185.52	25	3	26	12638.4		721.606	20.8321	1978-05-30	3463.91	0	0	0	0	25			7
1	1978-05-30	255	185	68	63	57	2906.61	0	1	0	8778.65		0	0	1978-05-30	2906.61	0	0	0	0	0			7
1	1978-06-02	285	210	68	70	62	3517	0	2	3	10620.8		610.388	21	1978-05-30	2906.61	0	0	0	0	0			7
1	1978-06-07	260	195	68	71	62	3570.49	0	2	8	10782.2		663.877	22.8403	1978-05-30	2906.61	0	0	0	0	0			7
1	1978-06-13	215	155	68	71	62	3570.49	0	2	14	10782.2		663.877	22.8403	1978-05-30	2906.61	0	0	0	0	0			7
1	1978-06-19	205	155	68	71	64	3678.68	0	2	20	11108.8		772.068	26.5625	1978-05-30	2906.61	0	0	0	0	0			7
1	1978-06-23	190	170	68	72	65	3788.48	20	2	24	11440.1		881.873	30.3403	1978-05-30	2906.61	0	0	0	0	20			7
1	1978-06-25	190	140	68	72	65	3788.48	100	2	26	11440.1		881.873	30.3403	1978-05-30	2906.61	0	0	25	0	75			7
1	1978-06-30	210	170	68	72	65	3788.48	100	3	31	11440.1		881.873	30.3403	1978-05-30	2906.61	0	0	25	0	75			7
1	1978-05-30	255	185	69	54	51	2225.37	0	1	0	6722.68		0	0	1978-05-30	2225.37	0	0	0	0	0			7
1	1978-06-02	285	210	69	55	51	2267.96	0	2	3	6851.21		42.5899	1.91383	1978-05-30	2225.37	0	0	0	0	0			7
1	1978-06-07	260	195	69	59	56	2669.44	0	2	8	8062.87		444.065	19.9546	1978-05-30	2225.37	0	0	0	0	0			7
1	1978-06-13	215	155	69	60	56	2716.06	0	2	14	8203.59		490.692	22.0499	1978-05-30	2225.37	0	0	0	0	0			7
1	1978-06-19	205	155	69	60	56	2716.06	0	2	20	8203.59		490.692	22.0499	1978-05-30	2225.37	0	0	0	0	0			7
1	1978-06-23	190	170	69	60	57	2763.09	100	2	24	8345.53		537.723	24.1633	1978-05-30	2225.37	0	0	5	0	95			7
1	1978-06-25	190	140	69	60	57	2763.09	100	3	26	8345.53		537.723	24.1633	1978-05-30	2225.37	0	0	5	0	95			7
1	1978-05-30	255	185	70	50	48	1938.55	0	1	0	5857.04		0	0	1978-05-30	1938.55	0	0	0	0	0			7
1	1978-06-02	285	210	70	67	63	3411.23	0	2	3	10301.6		1472.68	75.9683	1978-05-30	1938.55	0	0	0	0	0			7
1	1978-06-07	260	195	70	68	63	3463.91	0	2	8	10460.6		1525.36	78.686	1978-05-30	1938.55	0	0	0	0	0			7
1	1978-06-13	215	155	70	68	64	3517	0	2	14	10620.8		1578.45	81.4244	1978-05-30	1938.55	0	0	0	0	0			7
1	1978-06-19	205	155	70	69	64	3570.49	1	2	20	10782.2		1631.94	84.1837	1978-05-30	1938.55	1	0	0	0	0			7
1	1978-06-23	190	170	70	69	64	3570.49	11	2	24	10782.2		1631.94	84.1837	1978-05-30	1938.55	1	0	0	0	10			7
1	1978-06-25	190	140	70	69	64	3570.49	100	2	26	10782.2		1631.94	84.1837	1978-05-30	1938.55	1	0	40	0	59			7
1	1978-06-30	210	170	70	69	64	3570.49	100	3	31	10782.2		1631.94	84.1837	1978-05-30	1938.55	1	0	40	0	59			7
1	1978-05-30	255	185	71	55	50	2225.37	0	1	0	6722.68		0	0	1978-05-30	2225.37	0	0	0	0	0			7
1	1978-06-02	285	210	71	58	52	2442.36	0	2	3	7377.54		216.986	9.75057	1978-05-30	2225.37	0	0	0	0	0			7
1	1978-06-07	260	195	71	58	52	2442.36	5	2	8	7377.54		216.986	9.75057	1978-05-30	2225.37	0	0	0	0	5			7
1	1978-06-13	215	155	71	59	52	2486.97	100	2	14	7512.17		261.595	11.7551	1978-05-30	2225.37	0	0	10	0	90			7
1	1978-06-19	205	155	71	59	52	2486.97	100	3	20	7512.17		261.595	11.7551	1978-05-30	2225.37	0	0	10	0	90			7
1	1978-05-30	255	185	72	73	74	4361.73	0	1	0	13170.2		0	0	1978-05-30	4361.73	0	0	0	0	0			7
1	1978-06-02	285	210	72	80	81	5232.1	0	2	3	15797		870.368	19.9546	1978-05-30	4361.73	0	0	0	0	0			7
1	1978-06-07	260	195	72	87	89	6252.44	0	2	8	18876.4		1890.71	43.3477	1978-05-30	4361.73	0	0	0	0	0			7
1	1978-06-13	215	155	72	87	89	6252.44	0	2	14	18876.4		1890.71	43.3477	1978-05-30	4361.73	0	0	0	0	0			7
1	1978-06-19	205	155	72	87	89	6252.44	30	2	20	18876.4		1890.71	43.3477	1978-05-30	4361.73	0	0	0	0	30			7
1	1978-06-23	190	170	72	88	90	6395.35	70	2	24	19307.7		2033.62	46.6241	1978-05-30	4361.73	0	0	0	0	70			7
1	1978-06-25	190	140	72	88	90	6395.35	100	2	26	19307.7		2033.62	46.6241	1978-05-30	4361.73	0	0	60	0	40			7
1	1978-06-30	210	170	72	88	90	6395.35	100	3	31	19307.7		2033.62	46.6241	1978-05-30	4361.73	0	0	60	0	40			7
1	1978-05-30	255	185	73	52	50	2100.02	0	1	0	6344.38		0	0	1978-05-30	2100.02	0	0	0	0	0			7
1	1978-06-02	285	210	73	57	54	2486.97	0	2	3	7512.17		386.942	18.4256	1978-05-30	2100.02	0	0	0	0	0			8
1	1978-06-07	260	195	73	57	55	2531.98	0	2	8	7648.02		431.954	20.569	1978-05-30	2100.02	0	0	0	0	0			8
1	1978-06-13	215	155	73	59	57	2716.06	0	2	14	8203.59		616.039	29.3349	1978-05-30	2100.02	0	0	0	0	0			8
1	1978-06-19	205	155	73	59	57	2716.06	100	2	20	8203.59		616.039	29.3349	1978-05-30	2100.02	0	0	0	0	100			8
1	1978-06-23	190	170	73	59	57	2716.06	100	3	24	8203.59		616.039	29.3349	1978-05-30	2100.02	0	0	0	0	100			8
1	1978-05-30	255	185	74	64	57	2955.25	0	1	0	8925.46		0	0	1978-05-30	2955.25	0	0	0	0	0			8
1	1978-06-02	285	210	74	72	62	3624.38	0	2	3	10944.9		669.125	22.6419	1978-05-30	2955.25	0	0	0	0	0			8
1	1978-06-07	260	195	74	72	64	3733.38	0	2	8	11273.8		778.123	26.3302	1978-05-30	2955.25	0	0	0	0	0			8
1	1978-06-13	215	155	74	72	65	3788.48	40	2	14	11440.1		833.228	28.1948	1978-05-30	2955.25	0	0	0	0	40			8
1	1978-06-19	205	155	74	72	65	3788.48	60	2	20	11440.1		833.228	28.1948	1978-05-30	2955.25	0	0	0	0	60			8
1	1978-06-23	190	170	74	72	65	3788.48	60	2	24	11440.1		833.228	28.1948	1978-05-30	2955.25	0	0	20	0	40			8
1	1978-06-25	190	140	74	72	65	3788.48	60	3	26	11440.1		833.228	28.1948	1978-05-30	2955.25	0	0	20	0	40			8
1	1978-05-30	255	185	75	73	64	3788.48	0	1	0	11440.1		0	0	1978-05-30	3788.48	0	0	0	0	0			8
1	1978-06-02	285	210	75	78	70	4421.27	0	2	3	13349.9		632.793	16.7031	1978-05-30	3788.48	0	0	0	0	0			8
1	1978-06-07	260	195	75	89	74	5362.89	0	2	8	16191.7		1574.41	41.5579	1978-05-30	3788.48	0	0	0	0	0			8
1	1978-06-13	215	155	75	90	82	5971.47	0	2	14	18028.4		2182.98	57.6216	1978-05-30	3788.48	0	0	0	0	0			8
1	1978-06-19	205	155	75	90	82	5971.47	20	2	20	18028.4		2182.98	57.6216	1978-05-30	3788.48	0	0	0	0	20			8
1	1978-06-23	190	170	75	90	82	5971.47	30	2	24	18028.4		2182.98	57.6216	1978-05-30	3788.48	0	0	0	0	30			8
1	1978-06-25	190	140	75	90	82	5971.47	80	2	26	18028.4		2182.98	57.6216	1978-05-30	3788.48	0	0	10	0	70			8
1	1978-06-30	210	170	75	90	82	5971.47	100	2	31	18028.4		2182.98	57.6216	1978-05-30	3788.48	0	0	60	0	40			8
1	1978-07-04	230	225	75	90	82	5971.47	100	3	35	18028.4		2182.98	57.6216	1978-05-30	3788.48	0	0	60	0	40			8
1	1978-05-30	255	185	76	63	55	2810.53	0	1	0	8488.68		0	0	1978-05-30	2810.53	0	0	0	0	0			8
1	1978-06-02	285	210	76	63	55	2810.53	0	2	3	8488.68		0	0	1978-05-30	2810.53	0	0	0	0	0			8
1	1978-06-07	260	195	76	68	60	3307.07	0	2	8	9987.26		496.546	17.6673	1978-05-30	2810.53	0	0	0	0	0			8
1	1978-06-13	215	155	76	68	60	3307.07	0	2	14	9987.26		496.546	17.6673	1978-05-30	2810.53	0	0	0	0	0			8
1	1978-06-19	205	155	76	68	60	3307.07	50	2	20	9987.26		496.546	17.6673	1978-05-30	2810.53	0	0	0	0	50			8
1	1978-06-23	190	170	76	68	60	3307.07	75	2	24	9987.26		496.546	17.6673	1978-05-30	2810.53	0	0	0	0	75			8
1	1978-06-25	190	140	76	68	60	3307.07	75	3	26	9987.26		496.546	17.6673	1978-05-30	2810.53	0	0	0	0	75			8
1	1978-05-30	255	185	77	71	65	3733.38	0	1	0	11273.8		0	0	1978-05-30	3733.38	0	0	0	0	0			8
1	1978-06-02	285	210	77	72	68	3956.22	0	2	3	11946.4		222.84	5.96886	1978-05-30	3733.38	0	0	0	0	0			8
1	1978-06-07	260	195	77	70	72	4070.06	0	2	8	12289.9		336.682	9.01817	1978-05-30	3733.38	0	0	0	0	0			8
1	1978-06-13	215	155	77	88	77	5495.31	0	2	14	16591.3		1761.93	47.194	1978-05-30	3733.38	0	0	0	0	0			8
1	1978-06-19	205	155	77	88	77	5495.31	0	2	20	16591.3		1761.93	47.194	1978-05-30	3733.38	0	0	0	0	0			8
1	1978-06-23	190	170	77	88	77	5495.31	40	2	24	16591.3		1761.93	47.194	1978-05-30	3733.38	0	0	0	0	40			8
1	1978-06-25	190	140	77	89	78	5629.33	40	2	26	16995.8		1895.96	50.784	1978-05-30	3733.38	0	0	10	0	30			8
1	1978-06-30	210	170	77	89	78	5629.33	100	2	31	16995.8		1895.96	50.784	1978-05-30	3733.38	0	0	30	0	70			8
1	1978-07-04	230	225	77	89	78	5629.33	100	2	35	16995.8		1895.96	50.784	1978-05-30	3733.38	0	0	40	0	60			8
1	1978-07-09	200	180	77	89	78	5629.33	100	3	40	16995.8		1895.96	50.784	1978-05-30	3733.38	0	0	40	0	60			8
1	1978-05-30	255	185	78	60	50	2442.36	0	1	0	7377.54		0	0	1978-05-30	2442.36	0	0	0	0	0			8
1	1978-06-02	285	210	78	66	57	3053.76	0	2	3	9222.74		611.397	25.0331	1978-05-30	2442.36	0	0	0	0	0			8
1	1978-06-07	260	195	78	66	57	3053.76	0	2	8	9222.74		611.397	25.0331	1978-05-30	2442.36	0	0	0	0	0			8
1	1978-06-13	215	155	78	66	57	3053.76	0	2	14	9222.74		611.397	25.0331	1978-05-30	2442.36	0	0	0	0	0			8
1	1978-06-19	205	155	78	67	57	3103.61	100	2	20	9373.21		661.253	27.0744	1978-05-30	2442.36	0	0	0	0	100			8
1	1978-06-23	190	170	78	67	57	3103.61	100	2	24	9373.21		661.253	27.0744	1978-05-30	2442.36	0	0	40	0	60			8
1	1978-06-25	190	140	78	67	57	3103.61	100	3	26	9373.21		661.253	27.0744	1978-05-30	2442.36	0	0	40	0	60			8
1	1978-05-30	255	185	79	69	77	4302.59	0	1	0	12991.7		0	0	1978-05-30	4302.59	0	0	0	0	0			8
1	1978-06-02	285	210	79	78	79	4975.35	0	2	3	15022.1		672.759	15.6361	1978-05-30	4302.59	0	0	0	0	0			8
1	1978-06-07	260	195	79	80	77	4975.35	0	2	8	15022.1		672.759	15.6361	1978-05-30	4302.59	0	0	0	0	0			8
1	1978-06-13	215	155	79	82	77	5102.91	0	2	14	15407.1		800.327	18.6011	1978-05-30	4302.59	0	0	0	0	0			8
1	1978-06-19	205	155	79	82	77	5102.91	0	2	20	15407.1		800.327	18.6011	1978-05-30	4302.59	0	0	0	0	0			8
1	1978-06-23	190	170	79	82	77	5102.91	100	2	24	15407.1		800.327	18.6011	1978-05-30	4302.59	0	0	0	0	100			8
1	1978-06-25	190	140	79	82	77	5102.91	100	2	26	15407.1		800.327	18.6011	1978-05-30	4302.59	0	0	30	0	70			8
1	1978-06-30	210	170	79	82	77	5102.91	100	3	31	15407.1		800.327	18.6011	1978-05-30	4302.59	0	0	30	0	70			8
1	1978-05-30	255	185	80	43	43	1492.87	0	1	0	4511.98		0	0	1978-05-30	1492.87	0	0	0	0	0			8
1	1978-06-02	285	210	80	43	43	1492.87	100	2	3	4511.98		0	0	1978-05-30	1492.87	0	0	0	0	100			8
1	1978-06-07	260	195	80	43	43	1492.87	100	3	8	4511.98		0	0	1978-05-30	1492.87	0	0	0	0	100			8
1	1978-05-30	255	185	81	68	64	3517	0	1	0	10620.8		0	0	1978-05-30	3517	0	0	0	0	0			8
1	1978-06-02	285	210	81	78	74	4663.49	0	2	3	14080.9		1146.5	32.5987	1978-05-30	3517	0	0	0	0	0			8
1	1978-06-07	260	195	81	78	74	4663.49	1	2	8	14080.9		1146.5	32.5987	1978-05-30	3517	1	0	0	0	0			8
1	1978-06-13	215	155	81	80	75	4849.39	1	2	14	14642		1332.4	37.8845	1978-05-30	3517	1	0	0	0	0			8
1	1978-06-19	205	155	81	80	75	4849.39	11	2	20	14642		1332.4	37.8845	1978-05-30	3517	1	0	0	0	10			8
1	1978-06-23	190	170	81	80	75	4849.39	21	2	24	14642		1332.4	37.8845	1978-05-30	3517	1	0	5	0	15			9
1	1978-06-25	190	140	81	80	75	4849.39	61	2	26	14642		1332.4	37.8845	1978-05-30	3517	1	0	30	0	30			9
1	1978-06-30	210	170	81	80	75	4849.39	81	2	31	14642		1332.4	37.8845	1978-05-30	3517	1	0	60	0	20			9
1	1978-07-04	230	225	81	80	75	4849.39	81	3	35	14642		1332.4	37.8845	1978-05-30	3517	1	0	60	0	20			9
1	1978-05-30	255	185	82	54	43	1899.19	0	1	0	5738.25		0	0	1978-05-30	1899.19	0	0	0	0	0			9
1	1978-06-02	285	210	82	54	43	1899.19	0	2	3	5738.25		0	0	1978-05-30	1899.19	0	0	0	0	0			9
1	1978-06-07	260	195	82	54	43	1899.19	0	2	8	5738.25		0	0	1978-05-30	1899.19	0	0	0	0	0			9
1	1978-06-13	215	155	82	56	44	2018.48	30	2	14	6098.27		119.292	6.28122	1978-05-30	1899.19	0	0	0	0	30			9
1	1978-06-19	205	155	82	56	44	2018.48	30	3	20	6098.27		119.292	6.28122	1978-05-30	1899.19	0	0	0	0	30			9
1	1978-05-30	255	185	83	53	50	2141.4	0	1	0	6469.26		0	0	1978-05-30	2141.4	0	0	0	0	0			9
1	1978-06-02	285	210	83	53	50	2141.4	100	2	3	6469.26		0	0	1978-05-30	2141.4	0	0	0	0	100			9
1	1978-06-07	260	195	83	53	50	2141.4	100	3	8	6469.26		0	0	1978-05-30	2141.4	0	0	0	0	100			9
1	1978-05-30	255	185	84	66	56	3004.3	0	1	0	9073.49		0	0	1978-05-30	3004.3	0	0	0	0	0			9
1	1978-06-02	285	210	84	66	57	3053.76	0	2	3	9222.74		49.4527	1.64606	1978-05-30	3004.3	0	0	0	0	0			9
1	1978-06-07	260	195	84	66	57	3053.76	0	2	8	9222.74		49.4527	1.64606	1978-05-30	3004.3	0	0	0	0	0			9
1	1978-06-13	215	155	84	68	60	3307.07	0	2	14	9987.26		302.772	10.0779	1978-05-30	3004.3	0	0	0	0	0			9
1	1978-06-19	205	155	84	69	60	3358.95	20	2	20	10143.8		354.647	11.8046	1978-05-30	3004.3	0	0	0	0	20			9
1	1978-06-23	190	170	84	69	60	3358.95	50	2	24	10143.8		354.647	11.8046	1978-05-30	3004.3	0	0	0	0	50			9
1	1978-06-25	190	140	84	69	60	3358.95	100	2	26	10143.8		354.647	11.8046	1978-05-30	3004.3	0	0	40	0	60			9
1	1978-06-30	210	170	84	69	60	3358.95	100	3	31	10143.8		354.647	11.8046	1978-05-30	3004.3	0	0	40	0	60			9
1	1978-05-30	255	185	85	57	54	2486.97	0	1	0	7512.17		0	0	1978-05-30	2486.97	0	0	0	0	0			9
1	1978-06-02	285	210	85	60	57	2763.09	0	2	3	8345.53		276.128	11.103	1978-05-30	2486.97	0	0	0	0	0			9
1	1978-06-07	260	195	85	60	58	2810.53	0	2	8	8488.68		323.562	13.0103	1978-05-30	2486.97	0	0	0	0	0			9
1	1978-06-13	215	155	85	61	58	2858.37	0	2	14	8633.06		371.4	14.9339	1978-05-30	2486.97	0	0	0	0	0			9
1	1978-06-19	205	155	85	61	58	2858.37	0	2	20	8633.06		371.4	14.9339	1978-05-30	2486.97	0	0	0	0	0			9
1	1978-06-23	190	170	85	61	58	2858.37	100	2	24	8633.06		371.4	14.9339	1978-05-30	2486.97	0	0	0	0	100			9
1	1978-06-25	190	140	85	61	58	2858.37	100	2	26	8633.06		371.4	14.9339	1978-05-30	2486.97	0	0	10	0	90			9
1	1978-06-30	210	170	85	61	58	2858.37	100	2	31	8633.06		371.4	14.9339	1978-05-30	2486.97	0	10	60	0	30			9
1	1978-07-04	230	225	85	61	58	2858.37	100	3	35	8633.06		371.4	14.9339	1978-05-30	2486.97	0	10	60	0	30			9
1	1978-05-30	255	185	86	48	47	1821.68	0	1	0	5504.33		0	0	1978-05-30	1821.68	0	0	0	0	0			9
1	1978-06-02	285	210	86	54	53	2310.96	0	2	3	6980.97		489.279	26.8587	1978-05-30	1821.68	0	0	0	0	0			9
1	1978-06-07	260	195	86	64	62	3204.54	0	2	8	9677.79		1382.86	75.9114	1978-05-30	1821.68	0	0	0	0	0			9
1	1978-06-13	215	155	86	67	63	3411.23	0	2	14	10301.6		1589.55	87.2576	1978-05-30	1821.68	0	0	0	0	0			9
1	1978-06-19	205	155	86	67	63	3411.23	100	2	20	10301.6		1589.55	87.2576	1978-05-30	1821.68	0	0	5	0	95			9
1	1978-06-23	190	170	86	67	63	3411.23	100	3	24	10301.6		1589.55	87.2576	1978-05-30	1821.68	0	0	5	0	95			9
1	1978-06-02	285	210	87	64	60	3103.61	0	1	0	9373.21		0	0	1978-06-02	3103.61	0	0	0	0	0			9
1	1978-06-07	260	195	87	65	61	3204.54	0	2	5	9677.79		100.924	3.25182	1978-06-02	3103.61	0	0	0	0	0			9
1	1978-06-13	215	155	87	66	62	3307.07	0	2	11	9987.26		203.463	6.55567	1978-06-02	3103.61	0	0	0	0	0			9
1	1978-06-19	205	155	87	66	62	3307.07	20	2	17	9987.26		203.463	6.55567	1978-06-02	3103.61	0	0	0	0	20			9
1	1978-06-23	190	170	87	66	62	3307.07	90	2	21	9987.26		203.463	6.55567	1978-06-02	3103.61	0	0	0	0	90			9
1	1978-06-25	190	140	87	66	62	3307.07	100	2	23	9987.26		203.463	6.55567	1978-06-02	3103.61	0	5	40	0	55			9
1	1978-06-30	210	170	87	66	62	3307.07	100	3	28	9987.26		203.463	6.55567	1978-06-02	3103.61	0	5	40	0	55			9
1	1978-06-02	285	210	88	58	52	2442.36	0	1	0	7377.54		0	0	1978-06-02	2442.36	0	0	0	0	0			9
1	1978-06-07	260	195	88	60	52	2531.98	0	2	5	7648.02		89.6204	3.66942	1978-06-02	2442.36	0	0	0	0	0			9
1	1978-06-13	215	155	88	70	65	3678.68	0	2	11	11108.8		1236.32	50.6198	1978-06-02	2442.36	0	0	0	0	0			9
1	1978-06-19	205	155	88	73	66	3899.9	0	2	17	11776.4		1457.54	59.6777	1978-06-02	2442.36	0	0	0	0	0			9
1	1978-06-23	190	170	88	74	66	3956.22	0	2	21	11946.4		1513.86	61.9835	1978-06-02	2442.36	0	0	0	0	0			9
1	1978-06-25	190	140	88	75	68	4127.59	100	2	23	12463.6		1685.23	69	1978-06-02	2442.36	0	0	0	0	100			9
1	1978-06-30	210	170	88	75	68	4127.59	100	3	28	12463.6		1685.23	69	1978-06-02	2442.36	0	0	0	0	100			9
1	1978-06-02	285	210	89	69	62	3463.91	0	1	0	10460.6		0	0	1978-06-02	3463.91	0	0	0	0	0			9
1	1978-06-07	260	195	89	78	67	4243.85	0	2	5	12814.4		779.94	22.5162	1978-06-02	3463.91	0	0	0	0	0			9
1	1978-06-13	215	155	89	82	80	5297.29	0	2	11	15993.7		1833.38	52.9282	1978-06-02	3463.91	0	0	0	0	0			9
1	1978-06-19	205	155	89	82	80	5297.29	0	2	17	15993.7		1833.38	52.9282	1978-06-02	3463.91	0	0	0	0	0			9
1	1978-06-23	190	170	89	82	80	5297.29	25	2	21	15993.7		1833.38	52.9282	1978-06-02	3463.91	0	0	0	0	25			9
1	1978-06-25	190	140	89	83	80	5362.89	70	2	23	16191.7		1898.98	54.822	1978-06-02	3463.91	0	0	30	0	40			9
1	1978-06-30	210	170	89	83	80	5362.89	85	2	28	16191.7		1898.98	54.822	1978-06-02	3463.91	0	0	50	0	35			9
1	1978-07-04	230	225	89	83	80	5362.89	85	3	32	16191.7		1898.98	54.822	1978-06-02	3463.91	0	0	50	0	35			9
1	1978-06-02	285	210	90	53	46	1978.31	0	1	0	5977.05		0	0	1978-06-02	1978.31	0	0	0	0	0			9
1	1978-06-07	260	195	90	54	48	2100.02	0	2	5	6344.38		121.714	6.15243	1978-06-02	1978.31	0	0	0	0	0			9
1	1978-06-13	215	155	90	69	62	3463.91	0	2	11	10460.6		1485.6	75.0944	1978-06-02	1978.31	0	0	0	0	0			9
1	1978-06-19	205	155	90	71	64	3678.68	0	2	17	11108.8		1700.37	85.9504	1978-06-02	1978.31	0	0	0	0	0			9
1	1978-06-23	190	170	90	72	66	1492.87	0	2	21	4511.98		-485.444	-24.5383	1978-06-02	1978.31	0	0	0	0	0			10
1	1978-06-25	190	140	90	72	67	1492.87	80	2	23	4511.98		-485.444	-24.5383	1978-06-02	1978.31	0	0	0	0	80			10
1	1978-06-30	210	170	90	72	67	1492.87	80	3	28	4511.98		-485.444	-24.5383	1978-06-02	1978.31	0	0	0	0	80			10
1	1978-06-02	285	210	91	71	68	3899.9	0	1	0	11776.4		0	0	1978-06-02	3899.9	0	0	0	0	0			10
1	1978-06-07	260	195	91	80	70	4541.58	0	2	5	13713		641.674	16.4536	1978-06-02	3899.9	0	0	0	0	0			10
1	1978-06-13	215	155	91	84	74	5038.93	0	2	11	15214		1139.03	29.2066	1978-06-02	3899.9	0	0	0	0	0			10
1	1978-06-19	205	155	91	84	74	5038.93	0	2	17	15214		1139.03	29.2066	1978-06-02	3899.9	0	0	0	0	0			10
1	1978-06-23	190	170	91	85	74	5102.91	50	2	21	15407.1		1203.01	30.8473	1978-06-02	3899.9	0	0	0	0	50			10
1	1978-06-25	190	140	91	86	75	5232.1	100	2	23	15797		1332.2	34.1597	1978-06-02	3899.9	0	0	70	0	30			10
1	1978-06-30	210	170	91	86	75	5232.1	100	3	28	15797		1332.2	34.1597	1978-06-02	3899.9	0	0	70	0	30			10
1	1978-06-02	285	210	92	50	42	1708.44	0	1	0	5162.58		0	0	1978-06-02	1708.44	0	0	0	0	0			10
1	1978-06-07	260	195	92	50	43	1745.78	0	2	5	5275.27		37.3418	2.18573	1978-06-02	1708.44	0	0	0	0	0			10
1	1978-06-13	215	155	92	50	43	1745.78	0	2	11	5275.27		37.3418	2.18573	1978-06-02	1708.44	0	0	0	0	0			10
1	1978-06-19	205	155	92	50	43	1745.78	10	2	17	5275.27		37.3418	2.18573	1978-06-02	1708.44	0	0	0	0	10			10
1	1978-06-23	190	170	92	50	43	1745.78	30	2	21	5275.27		37.3418	2.18573	1978-06-02	1708.44	0	0	0	0	30			10
1	1978-06-25	190	140	92	50	43	1745.78	30	3	23	5275.27		37.3418	2.18573	1978-06-02	1708.44	0	0	0	0	30			10
1	1978-06-02	285	210	93	65	61	3204.54	0	1	0	9677.79		0	0	1978-06-02	3204.54	0	0	0	0	0			10
1	1978-06-07	260	195	93	66	61	3255.6	0	2	5	9831.92		51.0675	1.5936	1978-06-02	3204.54	0	0	0	0	0			10
1	1978-06-13	215	155	93	69	62	3463.91	0	2	11	10460.6		259.374	8.09398	1978-06-02	3204.54	0	0	0	0	0			10
1	1978-06-19	205	155	93	69	62	3463.91	100	2	17	10460.6		259.374	8.09398	1978-06-02	3204.54	0	0	0	0	100			10
1	1978-06-23	190	170	93	69	62	3463.91	100	2	21	10460.6		259.374	8.09398	1978-06-02	3204.54	0	10	60	0	30			10
1	1978-06-25	190	140	93	69	62	3463.91	100	3	23	10460.6		259.374	8.09398	1978-06-02	3204.54	0	10	60	0	30			10
1	1978-06-02	285	210	94	79	70	4481.22	0	1	0	13530.8		0	0	1978-06-02	4481.22	0	0	0	0	0			10
1	1978-06-07	260	195	94	82	70	4663.49	0	2	5	14080.9		182.269	4.06738	1978-06-02	4481.22	0	0	0	0	0			10
1	1978-06-13	215	155	94	85	73	5038.93	0	2	11	15214		557.705	12.4454	1978-06-02	4481.22	0	0	0	0	0			10
1	1978-06-19	205	155	94	85	73	5038.93	0	2	17	15214		557.705	12.4454	1978-06-02	4481.22	0	0	0	0	0			10
1	1978-06-23	190	170	94	86	73	5102.91	10	2	21	15407.1		621.691	13.8732	1978-06-02	4481.22	0	0	0	0	10			10
1	1978-06-25	190	140	94	86	73	5102.91	100	2	23	15407.1		621.691	13.8732	1978-06-02	4481.22	0	0	0	0	100			10
1	1978-06-30	210	170	94	86	73	5102.91	100	2	28	15407.1		621.691	13.8732	1978-06-02	4481.22	0	0	50	0	50			10
1	1978-07-04	230	225	94	86	73	5102.91	100	3	32	15407.1		621.691	13.8732	1978-06-02	4481.22	0	0	50	0	50			10
1	1978-06-02	285	210	95	66	62	3307.07	0	1	0	9987.26		0	0	1978-06-02	3307.07	0	0	0	0	0			10
1	1978-06-07	260	195	95	67	62	3358.95	0	2	5	10143.8		51.8749	1.5686	1978-06-02	3307.07	0	0	0	0	0			10
1	1978-06-13	215	155	95	71	65	3733.38	0	2	11	11273.8		426.303	12.8906	1978-06-02	3307.07	0	0	0	0	0			10
1	1978-06-19	205	155	95	73	65	3843.99	5	2	17	11607.7		536.915	16.2354	1978-06-02	3307.07	0	0	0	0	5			10
1	1978-06-23	190	170	95	73	65	3843.99	100	2	21	11607.7		536.915	16.2354	1978-06-02	3307.07	0	0	0	0	100			10
1	1978-06-25	190	140	95	74	66	3956.22	100	2	23	11946.4		649.143	19.6289	1978-06-02	3307.07	0	0	5	0	95			10
1	1978-06-30	210	170	95	74	66	3956.22	100	2	28	11946.4		649.143	19.6289	1978-06-02	3307.07	0	0	50	0	50			10
1	1978-07-04	230	225	95	74	66	3956.22	100	3	32	11946.4		649.143	19.6289	1978-06-02	3307.07	0	0	50	0	50			10
1	1978-06-02	285	210	96	70	67	3788.48	0	1	0	11440.1		0	0	1978-06-02	3788.48	0	0	0	0	0			10
1	1978-06-07	260	195	96	74	68	4070.06	0	2	5	12289.9		281.578	7.43247	1978-06-02	3788.48	0	0	0	0	0			10
1	1978-06-13	215	155	96	74	69	4127.59	0	2	11	12463.6		339.104	8.95093	1978-06-02	3788.48	0	0	0	0	0			10
1	1978-06-19	205	155	96	74	70	4185.52	0	2	17	12638.4		397.035	10.48	1978-06-02	3788.48	0	0	0	0	0			10
1	1978-06-23	190	170	96	75	72	4361.73	0	2	21	13170.2		573.248	15.1313	1978-06-02	3788.48	0	0	0	0	0			10
1	1978-06-25	190	140	96	75	72	4361.73	100	2	23	13170.2		573.248	15.1313	1978-06-02	3788.48	0	0	0	0	100			10
1	1978-06-30	210	170	96	76	72	4421.27	100	2	28	13349.9		632.793	16.7031	1978-06-02	3788.48	0	0	5	0	95			10
1	1978-07-04	230	225	96	76	72	4421.27	100	2	32	13349.9		632.793	16.7031	1978-06-02	3788.48	0	0	50	0	50			10
1	1978-07-09	200	180	96	76	72	4421.27	100	2	37	13349.9		632.793	16.7031	1978-06-02	3788.48	0	0	60	0	40			10
1	1978-07-13	220	150	96	76	72	4421.27	100	3	41	13349.9		632.793	16.7031	1978-06-02	3788.48	0	0	60	0	40			10
1	1978-06-07	260	195	97	70	66	3733.38	0	1	0	11273.8		0	0	1978-06-07	3733.38	0	0	0	0	0			10
1	1978-06-13	215	155	97	72	66	3843.99	0	2	6	11607.7		110.613	2.9628	1978-06-07	3733.38	0	0	0	0	0			10
1	1978-06-19	205	155	97	73	67	3956.22	0	2	12	11946.4		222.84	5.96886	1978-06-07	3733.38	0	0	0	0	0			10
1	1978-06-23	190	170	97	74	69	4127.59	0	2	16	12463.6		394.209	10.559	1978-06-07	3733.38	0	0	0	0	0			10
1	1978-06-25	190	140	97	74	69	4127.59	100	2	18	12463.6		394.209	10.559	1978-06-07	3733.38	0	0	0	0	100			10
1	1978-06-30	210	170	97	74	69	4127.59	100	2	23	12463.6		394.209	10.559	1978-06-07	3733.38	0	0	0	0	100			10
1	1978-07-04	230	225	97	74	69	4127.59	100	2	27	12463.6		394.209	10.559	1978-06-07	3733.38	0	0	0	0	100			10
1	1978-07-09	200	180	97	74	69	4127.59	100	2	32	12463.6		394.209	10.559	1978-06-07	3733.38	0	0	10	0	90			10
1	1978-07-13	220	150	97	75	69	4185.52	100	2	36	12638.4		452.139	12.1107	1978-06-07	3733.38	0	0	30	0	70			10
1	1978-07-17	255	160	97	75	69	4185.52	100	3	40	12638.4		452.139	12.1107	1978-06-07	3733.38	0	0	30	0	70			10
1	1978-06-07	260	195	98	43	36	1259.73	0	1	0	3808.38		0	0	1978-06-07	1259.73	0	0	0	0	0			10
1	1978-06-13	215	155	98	52	44	1860.23	0	2	6	5620.68		600.497	47.6686	1978-06-07	1259.73	0	0	0	0	0			10
1	1978-06-19	205	155	98	52	44	1860.23	0	3	12	5620.68		600.497	47.6686	1978-06-07	1259.73	0	0	0	0	0			10
1	1978-06-07	260	195	99	59	54	2577.39	0	1	0	7785.08		0	0	1978-06-07	2577.39	0	0	0	0	0			11
1	1978-06-13	215	155	99	62	55	2763.09	0	2	6	8345.53		185.7	7.20495	1978-06-07	2577.39	0	0	0	0	0			11
1	1978-06-19	205	155	99	63	56	2858.37	0	2	12	8633.06		280.972	10.9014	1978-06-07	2577.39	0	0	0	0	0			11
1	1978-06-23	190	170	99	63	56	2858.37	50	2	16	8633.06		280.972	10.9014	1978-06-07	2577.39	0	0	0	0	50			11
1	1978-06-25	190	140	99	63	56	2858.37	50	3	18	8633.06		280.972	10.9014	1978-06-07	2577.39	0	0	0	0	50			11
1	1978-06-07	260	195	100	80	70	4541.58	0	1	0	13713		0	0	1978-06-07	4541.58	0	0	0	0	0			11
1	1978-06-13	215	155	100	84	74	5038.93	0	2	6	15214		497.353	10.9511	1978-06-07	4541.58	0	0	0	0	0			11
1	1978-06-19	205	155	100	85	75	5167.3	100	2	12	15601.4		625.728	13.7778	1978-06-07	4541.58	0	0	0	0	100			11
1	1978-06-23	190	170	100	85	75	5167.3	100	2	16	15601.4		625.728	13.7778	1978-06-07	4541.58	0	0	0	0	100			11
1	1978-06-25	190	140	100	85	75	5167.3	100	3	18	15601.4		625.728	13.7778	1978-06-07	4541.58	0	0	0	0	100			11
1	1978-06-07	260	195	101	81	70	4602.33	0	1	0	13896.3		0	0	1978-06-07	4602.33	0	0	0	0	0			11
1	1978-06-13	215	155	101	84	73	4975.35	0	2	6	15022.1		373.015	8.10491	1978-06-07	4602.33	0	0	0	0	0			11
1	1978-06-19	205	155	101	85	74	5102.91	0	2	12	15407.1		500.583	10.8767	1978-06-07	4602.33	0	0	0	0	0			11
1	1978-06-23	190	170	101	85	74	5102.91	100	2	16	15407.1		500.583	10.8767	1978-06-07	4602.33	0	0	0	0	100			11
1	1978-06-25	190	140	101	95	75	5833.4	100	2	18	17611.7		1231.07	26.7488	1978-06-07	4602.33	0	0	10	0	90			11
1	1978-06-30	210	170	101	85	75	5167.3	100	2	23	15601.4		564.972	12.2758	1978-06-07	4602.33	0	0	15	0	85			11
1	1978-07-04	230	225	101	85	75	5167.3	100	2	27	15601.4		564.972	12.2758	1978-06-07	4602.33	0	0	15	0	85			11
1	1978-07-09	200	180	101	85	75	5167.3	100	2	32	15601.4		564.972	12.2758	1978-06-07	4602.33	0	0	25	0	75			11
1	1978-07-13	220	150	101	85	75	5167.3	100	3	36	15601.4		564.972	12.2758	1978-06-07	4602.33	0	0	25	0	75			11
1	1978-06-07	260	195	102	73	64	3788.48	0	1	0	11440.1		0	0	1978-06-07	3788.48	0	0	0	0	0			11
1	1978-06-13	215	155	102	77	67	4185.52	0	2	6	12638.4		397.035	10.48	1978-06-07	3788.48	0	0	0	0	0			11
1	1978-06-19	205	155	102	77	67	4185.52	100	2	12	12638.4		397.035	10.48	1978-06-07	3788.48	0	0	0	0	100			11
1	1978-06-23	190	170	102	77	67	4185.52	100	2	16	12638.4		397.035	10.48	1978-06-07	3788.48	0	0	0	0	100			11
1	1978-06-25	190	140	102	77	67	4185.52	100	2	18	12638.4		397.035	10.48	1978-06-07	3788.48	0	0	30	0	70			11
1	1978-06-30	210	170	102	77	67	4185.52	100	3	23	12638.4		397.035	10.48	1978-06-07	3788.48	0	0	30	0	70			11
1	1978-06-07	260	195	103	83	76	5102.91	0	1	0	15407.1		0	0	1978-06-07	5102.91	0	0	0	0	0			11
1	1978-06-13	215	155	103	92	81	6041.1	0	2	6	18238.6		938.189	18.3853	1978-06-07	5102.91	0	0	0	0	0			11
1	1978-06-19	205	155	103	92	81	6041.1	0	2	12	18238.6		938.189	18.3853	1978-06-07	5102.91	0	0	0	0	0			11
1	1978-06-23	190	170	103	92	81	6041.1	10	2	16	18238.6		938.189	18.3853	1978-06-07	5102.91	0	0	0	0	10			11
1	1978-06-25	190	140	103	92	82	6111.14	100	2	18	18449.9		1008.23	19.7579	1978-06-07	5102.91	0	0	0	0	100			11
1	1978-06-30	210	170	103	92	82	6111.14	100	2	23	18449.9		1008.23	19.7579	1978-06-07	5102.91	0	0	30	0	70			11
1	1978-07-04	230	225	103	92	82	6111.14	100	2	27	18449.9		1008.23	19.7579	1978-06-07	5102.91	0	0	40	0	60			11
1	1978-07-09	200	180	103	92	82	6111.14	100	2	32	18449.9		1008.23	19.7579	1978-06-07	5102.91	0	0	60	0	40			11
1	1978-07-13	220	150	103	92	82	6111.14	100	2	36	18449.9		1008.23	19.7579	1978-06-07	5102.91	0	0	75	0	25			11
1	1978-07-17	255	160	103	92	82	6111.14	100	3	40	18449.9		1008.23	19.7579	1978-06-07	5102.91	0	0	75	0	25			11
1	1978-06-07	260	195	104	44	39	1390.53	0	1	0	4203.12		0	0	1978-06-07	1390.53	0	0	0	0	0			11
1	1978-06-13	215	155	104	61	56	2763.09	0	2	6	8345.53		1372.57	98.7081	1978-06-07	1390.53	0	0	0	0	0			11
1	1978-06-19	205	155	104	65	58	3053.76	0	2	12	9222.74		1663.23	119.611	1978-06-07	1390.53	0	0	0	0	0			11
1	1978-06-23	190	170	104	66	58	3103.61	0	2	16	9373.21		1713.08	123.196	1978-06-07	1390.53	0	0	0	0	0			11
1	1978-06-25	190	140	104	66	59	3153.87	100	2	18	9524.89		1763.34	126.811	1978-06-07	1390.53	0	0	0	0	100			11
1	1978-06-30	210	170	104	67	60	3255.6	100	2	23	9831.92		1865.07	134.127	1978-06-07	1390.53	0	0	0	0	100			11
1	1978-07-04	230	225	104	67	60	3255.6	100	2	27	9831.92		1865.07	134.127	1978-06-07	1390.53	0	0	40	0	60			11
1	1978-07-09	200	180	104	67	60	3255.6	100	3	32	9831.92		1865.07	134.127	1978-06-07	1390.53	0	0	40	0	60			11
1	1978-06-07	260	195	105	56	48	2183.19	0	1	0	6595.36		0	0	1978-06-07	2183.19	0	0	0	0	0			11
1	1978-06-13	215	155	105	56	48	2183.19	0	2	6	6595.36		0	0	1978-06-07	2183.19	0	0	0	0	0			11
1	1978-06-19	205	155	105	58	50	2354.35	0	2	12	7111.94		171.167	7.84024	1978-06-07	2183.19	0	0	0	0	0			11
1	1978-06-23	190	170	105	58	50	2354.35	0	2	16	7111.94		171.167	7.84024	1978-06-07	2183.19	0	0	0	0	0			11
1	1978-06-25	190	140	105	58	50	2354.35	100	2	18	7111.94		171.167	7.84024	1978-06-07	2183.19	0	0	0	0	100			11
1	1978-06-30	210	170	105	58	50	2354.35	100	3	23	7111.94		171.167	7.84024	1978-06-07	2183.19	0	0	0	0	100			11
1	1978-06-07	260	195	106	77	73	4541.58	0	1	0	13713		0	0	1978-06-07	4541.58	0	0	0	0	0			11
1	1978-06-13	215	155	106	81	74	4849.39	0	2	6	14642		307.818	6.77778	1978-06-07	4541.58	0	0	0	0	0			11
1	1978-06-19	205	155	106	81	74	4849.39	0	2	12	14642		307.818	6.77778	1978-06-07	4541.58	0	0	0	0	0			11
1	1978-06-23	190	170	106	81	75	4912.17	100	2	16	14831.4		370.593	8.16	1978-06-07	4541.58	0	0	0	0	100			11
1	1978-06-25	190	140	106	81	75	4912.17	100	2	18	14831.4		370.593	8.16	1978-06-07	4541.58	0	0	5	0	95			11
1	1978-06-30	210	170	106	81	75	4912.17	100	2	23	14831.4		370.593	8.16	1978-06-07	4541.58	0	0	15	0	85			11
1	1978-07-04	230	225	106	81	75	4912.17	100	2	27	14831.4		370.593	8.16	1978-06-07	4541.58	0	0	60	0	40			11
1	1978-07-09	200	180	106	81	75	4912.17	100	3	32	14831.4		370.593	8.16	1978-06-07	4541.58	0	0	60	0	40			11
1	1978-06-07	260	195	107	67	57	3103.61	0	1	0	9373.21		0	0	1978-06-07	3103.61	0	0	0	0	0			11
1	1978-06-13	215	155	107	82	71	4725.06	0	2	6	14266.7		1621.44	52.2438	1978-06-07	3103.61	0	0	0	0	0			11
1	1978-06-19	205	155	107	83	71	4787.02	0	2	12	14453.7		1683.41	54.2404	1978-06-07	3103.61	0	0	0	0	0			11
1	1978-06-23	190	170	107	83	72	4849.39	100	2	16	14642		1745.78	56.25	1978-06-07	3103.61	0	0	0	0	100			11
1	1978-06-25	190	140	107	83	72	4849.39	100	3	18	14642		1745.78	56.25	1978-06-07	3103.61	0	0	0	0	100			12
1	1978-06-07	260	195	108	68	52	2906.61	0	1	0	8778.65		0	0	1978-06-07	2906.61	0	0	0	0	0			12
1	1978-06-13	215	155	108	70	55	3153.87	0	2	6	9524.89		247.264	8.50694	1978-06-07	2906.61	0	0	0	0	0			12
1	1978-06-19	205	155	108	71	66	3788.48	0	2	12	11440.1		881.873	30.3403	1978-06-07	2906.61	0	0	0	0	0			12
1	1978-06-23	190	170	108	71	66	3788.48	30	2	16	11440.1		881.873	30.3403	1978-06-07	2906.61	0	0	0	0	30			12
1	1978-06-25	190	140	108	71	66	3788.48	30	3	18	11440.1		881.873	30.3403	1978-06-07	2906.61	0	0	0	0	30			12
1	1978-06-07	260	195	109	68	59	3255.6	0	1	0	9831.92		0	0	1978-06-07	3255.6	0	0	0	0	0			12
1	1978-06-13	215	155	109	68	60	3307.07	0	2	6	9987.26		51.4712	1.581	1978-06-07	3255.6	0	0	0	0	0			12
1	1978-06-19	205	155	109	68	60	3307.07	100	2	12	9987.26		51.4712	1.581	1978-06-07	3255.6	0	0	15	0	85			12
1	1978-06-23	190	170	109	68	60	3307.07	100	3	16	9987.26		51.4712	1.581	1978-06-07	3255.6	0	0	15	0	85			12
1	1978-06-07	260	195	110	54	53	2310.96	0	1	0	6980.97		0	0	1978-06-07	2310.96	0	0	0	0	0			12
1	1978-06-13	215	155	110	67	67	3624.38	0	2	6	10944.9		1313.42	56.8347	1978-06-07	2310.96	0	0	0	0	0			12
1	1978-06-19	205	155	110	67	68	3678.68	0	2	12	11108.8		1367.72	59.1842	1978-06-07	2310.96	0	0	0	0	0			12
1	1978-06-23	190	170	110	67	68	3678.68	0	2	16	11108.8		1367.72	59.1842	1978-06-07	2310.96	0	0	0	0	0			12
1	1978-06-25	190	140	110	67	68	3678.68	6	2	18	11108.8		1367.72	59.1842	1978-06-07	2310.96	0	0	1	0	5			12
1	1978-06-30	210	170	110	67	68	3678.68	100	2	23	11108.8		1367.72	59.1842	1978-06-07	2310.96	0	0	10	0	90			12
1	1978-07-04	230	225	110	67	68	3678.68	100	2	27	11108.8		1367.72	59.1842	1978-06-07	2310.96	0	0	25	0	75			12
1	1978-07-09	200	180	110	67	68	3678.68	100	2	32	11108.8		1367.72	59.1842	1978-06-07	2310.96	0	0	60	0	40			12
1	1978-07-13	220	150	110	67	68	3678.68	100	2	36	11108.8		1367.72	59.1842	1978-06-07	2310.96	0	0	75	0	25			12
1	1978-07-17	255	160	110	67	68	3678.68	100	3	40	11108.8		1367.72	59.1842	1978-06-07	2310.96	0	0	75	0	25			12
1	1978-06-07	260	195	111	80	71	4602.33	0	1	0	13896.3		0	0	1978-06-07	4602.33	0	0	0	0	0			12
1	1978-06-13	215	155	111	83	72	4849.39	0	2	6	14642		247.062	5.36819	1978-06-07	4602.33	0	0	0	0	0			12
1	1978-06-19	205	155	111	83	72	4849.39	0	2	12	14642		247.062	5.36819	1978-06-07	4602.33	0	0	0	0	0			12
1	1978-06-23	190	170	111	83	72	4849.39	50	2	16	14642		247.062	5.36819	1978-06-07	4602.33	0	0	0	0	50			12
1	1978-06-25	190	140	111	83	72	4849.39	50	3	18	14642		247.062	5.36819	1978-06-07	4602.33	0	0	0	0	50			12
1	1978-06-13	215	155	112	59	55	2623.21	0	1	0	7923.37		0	0	1978-06-13	2623.21	0	0	0	0	0			12
1	1978-06-19	205	155	112	63	57	2906.61	0	2	6	8778.65		283.394	10.8033	1978-06-13	2623.21	0	0	0	0	0			12
1	1978-06-23	190	170	112	64	58	3004.3	0	2	10	9073.49		381.089	14.5275	1978-06-13	2623.21	0	0	0	0	0			12
1	1978-06-25	190	140	112	64	58	3004.3	60	2	12	9073.49		381.089	14.5275	1978-06-13	2623.21	0	0	0	0	60			12
1	1978-06-30	210	170	112	64	58	3004.3	100	2	17	9073.49		381.089	14.5275	1978-06-13	2623.21	0	0	80	0	20			12
1	1978-07-04	230	225	112	64	58	3004.3	100	3	21	9073.49		381.089	14.5275	1978-06-13	2623.21	0	0	80	0	20			12
1	1978-06-13	215	155	113	68	59	3255.6	0	1	0	9831.92		0	0	1978-06-13	3255.6	0	0	0	0	0			12
1	1978-06-19	205	155	113	72	62	3624.38	0	2	6	10944.9		368.776	11.3274	1978-06-13	3255.6	0	0	0	0	0			12
1	1978-06-23	190	170	113	74	63	3788.48	0	2	10	11440.1		532.878	16.368	1978-06-13	3255.6	0	0	0	0	0			12
1	1978-06-25	190	140	113	75	65	3956.22	100	2	12	11946.4		700.614	21.5202	1978-06-13	3255.6	0	0	0	0	100			12
1	1978-06-30	210	170	113	75	65	3956.22	100	2	17	11946.4		700.614	21.5202	1978-06-13	3255.6	0	0	30	0	70			12
1	1978-07-04	230	225	113	75	65	3956.22	100	2	21	11946.4		700.614	21.5202	1978-06-13	3255.6	0	0	40	0	60			12
1	1978-07-09	200	180	113	75	65	3956.22	100	3	26	11946.4		700.614	21.5202	1978-06-13	3255.6	0	0	40	0	60			12
1	1978-06-13	215	155	114	78	68	4302.59	0	1	0	12991.7		0	0	1978-06-13	4302.59	0	0	0	0	0			12
1	1978-06-19	205	155	114	80	70	4541.58	0	2	6	13713		238.988	5.55451	1978-06-13	4302.59	0	0	0	0	0			12
1	1978-06-23	190	170	114	80	71	4602.33	0	2	10	13896.3		299.744	6.9666	1978-06-13	4302.59	0	0	0	0	0			12
1	1978-06-25	190	140	114	81	71	4663.49	100	2	12	14080.9		360.904	8.38807	1978-06-13	4302.59	0	0	0	0	100			12
1	1978-06-30	210	170	114	81	71	4663.49	100	2	17	14080.9		360.904	8.38807	1978-06-13	4302.59	0	0	50	0	50			12
1	1978-07-04	230	225	114	81	71	4663.49	100	3	21	14080.9		360.904	8.38807	1978-06-13	4302.59	0	0	50	0	50			12
1	1978-06-13	215	155	115	68	57	3153.87	0	1	0	9524.89		0	0	1978-06-13	3153.87	0	0	0	0	0			12
1	1978-06-19	205	155	115	71	60	3463.91	0	2	6	10460.6		310.038	9.8304	1978-06-13	3153.87	0	0	0	0	0			12
1	1978-06-23	190	170	115	73	62	3678.68	0	2	10	11108.8		524.804	16.64	1978-06-13	3153.87	0	0	0	0	0			12
1	1978-06-25	190	140	115	74	64	3843.99	0	2	12	11607.7		690.118	21.8816	1978-06-13	3153.87	0	0	0	0	0			12
1	1978-06-30	210	170	115	74	64	3843.99	50	2	17	11607.7		690.118	21.8816	1978-06-13	3153.87	0	0	0	0	50			12
1	1978-07-04	230	225	115	74	64	3843.99	100	2	21	11607.7		690.118	21.8816	1978-06-13	3153.87	0	0	25	0	75			12
1	1978-07-09	200	180	115	74	64	3843.99	100	3	26	11607.7		690.118	21.8816	1978-06-13	3153.87	0	0	25	0	75			12
1	1978-06-13	215	155	116	63	53	2716.06	0	1	0	8203.59		0	0	1978-06-13	2716.06	0	0	0	0	0			12
1	1978-06-19	205	155	116	65	55	2906.61	0	2	6	8778.65		190.544	7.01546	1978-06-13	2716.06	0	0	0	0	0			12
1	1978-06-23	190	170	116	67	56	3053.76	0	2	10	9222.74		337.691	12.4331	1978-06-13	2716.06	0	0	0	0	0			12
1	1978-06-25	190	140	116	67	57	3103.61	1	2	12	9373.21		387.548	14.2687	1978-06-13	2716.06	0	0	1	0	0			12
1	1978-06-30	210	170	116	67	57	3103.61	35	2	17	9373.21		387.548	14.2687	1978-06-13	2716.06	0	0	5	0	30			12
1	1978-07-04	230	225	116	67	57	3103.61	65	2	21	9373.21		387.548	14.2687	1978-06-13	2716.06	0	0	15	0	50			12
1	1978-07-09	200	180	116	67	57	3103.61	80	2	26	9373.21		387.548	14.2687	1978-06-13	2716.06	0	0	40	0	40			12
1	1978-07-13	220	150	116	67	57	3103.61	90	2	30	9373.21		387.548	14.2687	1978-06-13	2716.06	0	5	50	0	35			12
1	1978-07-17	255	160	116	67	57	3103.61	90	3	34	9373.21		387.548	14.2687	1978-06-13	2716.06	0	5	50	0	35			12
1	1978-06-13	215	155	117	52	46	1938.55	0	1	0	5857.04		0	0	1978-06-13	1938.55	0	0	0	0	0			12
1	1978-06-19	205	155	117	54	47	2059.05	0	2	6	6220.72		120.503	6.21616	1978-06-13	1938.55	0	0	0	0	0			13
1	1978-06-23	190	170	117	54	47	2059.05	0	3	10	6220.72		120.503	6.21616	1978-06-13	1938.55	0	0	0	0	0			13
1	1978-06-13	215	155	118	69	59	3307.07	0	1	0	9987.26		0	0	1978-06-13	3307.07	0	0	0	0	0			13
1	1978-06-19	205	155	118	71	63	3624.38	0	2	6	10944.9		317.305	9.59473	1978-06-13	3307.07	0	0	0	0	0			13
1	1978-06-23	190	170	118	71	65	3733.38	0	2	10	11273.8		426.303	12.8906	1978-06-13	3307.07	0	0	0	0	0			13
1	1978-06-25	190	140	118	74	65	3899.9	0	2	12	11776.4		592.827	17.926	1978-06-13	3307.07	0	0	0	0	0			13
1	1978-06-30	210	170	118	75	65	3956.22	0	2	17	11946.4		649.143	19.6289	1978-06-13	3307.07	0	0	0	0	0			13
1	1978-07-04	230	225	118	76	65	4012.94	10	2	21	12117.5		705.862	21.344	1978-06-13	3307.07	0	0	0	0	10			13
1	1978-07-09	200	180	118	76	65	4012.94	30	2	26	12117.5		705.862	21.344	1978-06-13	3307.07	0	0	0	0	30			13
1	1978-07-13	220	150	118	76	65	4012.94	50	2	30	12117.5		705.862	21.344	1978-06-13	3307.07	0	0	20	0	30			13
1	1978-07-17	255	160	118	76	65	4012.94	50	3	34	12117.5		705.862	21.344	1978-06-13	3307.07	0	0	20	0	30			13
1	1978-06-13	215	155	119	68	61	3358.95	0	1	0	10143.8		0	0	1978-06-13	3358.95	0	0	0	0	0			13
1	1978-06-19	205	155	119	71	65	3733.38	0	2	6	11273.8		374.428	11.1472	1978-06-13	3358.95	0	0	0	0	0			13
1	1978-06-23	190	170	119	73	66	3899.9	0	2	10	11776.4		540.952	16.1048	1978-06-13	3358.95	0	0	0	0	0			13
1	1978-06-25	190	140	119	73	67	3956.22	0	2	12	11946.4		597.268	17.7814	1978-06-13	3358.95	0	0	0	0	0			13
1	1978-06-30	210	170	119	73	67	3956.22	0	2	17	11946.4		597.268	17.7814	1978-06-13	3358.95	0	0	0	0	0			13
1	1978-07-04	230	225	119	73	67	3956.22	0	2	21	11946.4		597.268	17.7814	1978-06-13	3358.95	0	0	0	0	0			13
1	1978-07-09	200	180	119	73	67	3956.22	0	2	26	11946.4		597.268	17.7814	1978-06-13	3358.95	0	0	0	0	0			13
1	1978-07-13	220	150	119	73	67	3956.22	100	2	30	11946.4		597.268	17.7814	1978-06-13	3358.95	0	0	0	0	100			13
1	1978-07-17	255	160	119	73	67	3956.22	100	2	34	11946.4		597.268	17.7814	1978-06-13	3358.95	0	0	0	0	100			13
1	1978-07-21	265	160	119	73	67	3956.22	100	3	38	11946.4		597.268	17.7814	1978-06-13	3358.95	0	0	0	0	100			13
1	1978-06-13	215	155	120	61	53	2623.21	0	1	0	7923.37		0	0	1978-06-13	2623.21	0	0	0	0	0			13
1	1978-06-19	205	155	120	61	53	2623.21	100	2	6	7923.37		0	0	1978-06-13	2623.21	0	0	15	0	85			13
1	1978-06-23	190	170	120	61	53	2623.21	100	3	10	7923.37		0	0	1978-06-13	2623.21	0	0	15	0	85			13
1	1978-06-19	205	155	121	67	58	3153.87	0	1	0	9524.89		0	0	1978-06-19	3153.87	0	0	0	0	0			13
1	1978-06-23	190	170	121	68	59	3255.6	0	2	4	9831.92		101.731	3.2256	1978-06-19	3153.87	0	0	0	0	0			13
1	1978-06-25	190	140	121	68	59	3255.6	0	2	6	9831.92		101.731	3.2256	1978-06-19	3153.87	0	0	0	0	0			13
1	1978-06-30	210	170	121	68	59	3255.6	0	2	11	9831.92		101.731	3.2256	1978-06-19	3153.87	0	0	0	0	0			13
1	1978-07-04	230	225	121	68	59	3255.6	0	2	15	9831.92		101.731	3.2256	1978-06-19	3153.87	0	0	0	0	0			13
1	1978-07-09	200	180	121	68	59	3255.6	0	2	20	9831.92		101.731	3.2256	1978-06-19	3153.87	0	0	0	0	0			13
1	1978-07-13	220	150	121	68	59	3255.6	100	2	24	9831.92		101.731	3.2256	1978-06-19	3153.87	0	0	0	0	100			13
1	1978-07-17	255	160	121	68	59	3255.6	100	2	28	9831.92		101.731	3.2256	1978-06-19	3153.87	0	0	0	0	100			13
1	1978-07-21	265	160	121	68	59	3255.6	100	2	32	9831.92		101.731	3.2256	1978-06-19	3153.87	0	0	10	0	90			13
1	1978-07-24	270	170	121	68	59	3255.6	100	2	35	9831.92		101.731	3.2256	1978-06-19	3153.87	0	0	40	0	60			13
1	1978-07-27	260	185	121	68	59	3255.6	100	3	38	9831.92		101.731	3.2256	1978-06-19	3153.87	0	0	40	0	60			13
1	1978-06-19	205	155	122	65	59	3103.61	0	1	0	9373.21		0	0	1978-06-19	3103.61	0	0	0	0	0			13
1	1978-06-23	190	170	122	67	61	3307.07	0	2	4	9987.26		203.463	6.55567	1978-06-19	3103.61	0	0	0	0	0			13
1	1978-06-25	190	140	122	73	66	3899.9	0	2	6	11776.4		796.29	25.6569	1978-06-19	3103.61	0	0	0	0	0			13
1	1978-06-30	210	170	122	73	66	3899.9	0	2	11	11776.4		796.29	25.6569	1978-06-19	3103.61	0	0	0	0	0			13
1	1978-07-04	230	225	122	73	66	3899.9	0	2	15	11776.4		796.29	25.6569	1978-06-19	3103.61	0	0	0	0	0			13
1	1978-07-09	200	180	122	73	66	3899.9	0	2	20	11776.4		796.29	25.6569	1978-06-19	3103.61	0	0	0	0	0			13
1	1978-07-13	220	150	122	73	66	3899.9	20	2	24	11776.4		796.29	25.6569	1978-06-19	3103.61	0	0	0	0	20			13
1	1978-07-17	255	160	122	73	66	3899.9	50	2	28	11776.4		796.29	25.6569	1978-06-19	3103.61	0	0	0	0	50			13
1	1978-07-21	265	160	122	73	66	3899.9	80	2	32	11776.4		796.29	25.6569	1978-06-19	3103.61	0	0	20	0	60			13
1	1978-07-24	270	170	122	73	66	3899.9	80	3	35	11776.4		796.29	25.6569	1978-06-19	3103.61	0	0	20	0	60			13
1	1978-06-19	205	155	123	67	53	2906.61	0	1	0	8778.65		0	0	1978-06-19	2906.61	0	0	0	0	0			13
1	1978-06-23	190	170	123	67	63	3411.23	0	2	4	10301.6		504.619	17.3611	1978-06-19	2906.61	0	0	0	0	0			13
1	1978-06-25	190	140	123	70	66	3733.38	0	2	6	11273.8		826.769	28.4444	1978-06-19	2906.61	0	0	0	0	0			13
1	1978-06-30	210	170	123	70	66	3733.38	0	2	11	11273.8		826.769	28.4444	1978-06-19	2906.61	0	0	0	0	0			13
1	1978-07-04	230	225	123	70	66	3733.38	0	2	15	11273.8		826.769	28.4444	1978-06-19	2906.61	0	0	0	0	0			13
1	1978-07-09	200	180	123	71	66	3788.48	0	2	20	11440.1		881.873	30.3403	1978-06-19	2906.61	0	0	0	0	0			13
1	1978-07-13	220	150	123	71	66	3788.48	70	2	24	11440.1		881.873	30.3403	1978-06-19	2906.61	0	0	0	0	70			13
1	1978-07-17	255	160	123	71	66	3788.48	70	2	28	11440.1		881.873	30.3403	1978-06-19	2906.61	0	0	0	0	70			13
1	1978-07-21	265	160	123	71	66	3788.48	90	2	32	11440.1		881.873	30.3403	1978-06-19	2906.61	0	0	50	0	40			13
1	1978-07-24	270	170	123	71	66	3788.48	90	3	35	11440.1		881.873	30.3403	1978-06-19	2906.61	0	0	50	0	40			13
1	1978-06-19	205	155	124	64	58	3004.3	0	1	0	9073.49		0	0	1978-06-19	3004.3	0	0	0	0	0			13
1	1978-06-23	190	170	124	64	59	3053.76	0	2	4	9222.74		49.4527	1.64606	1978-06-19	3004.3	0	0	0	0	0			13
1	1978-06-25	190	140	124	67	63	3411.23	0	2	6	10301.6		406.925	13.5447	1978-06-19	3004.3	0	0	0	0	0			13
1	1978-06-30	210	170	124	67	63	3411.23	0	2	11	10301.6		406.925	13.5447	1978-06-19	3004.3	0	0	0	0	0			13
1	1978-07-04	230	225	124	67	63	3411.23	0	2	15	10301.6		406.925	13.5447	1978-06-19	3004.3	0	0	0	0	0			13
1	1978-07-09	200	180	124	67	63	3411.23	0	2	20	10301.6		406.925	13.5447	1978-06-19	3004.3	0	0	0	0	0			13
1	1978-07-13	220	150	124	67	63	3411.23	60	2	24	10301.6		406.925	13.5447	1978-06-19	3004.3	0	0	0	0	60			14
1	1978-07-17	255	160	124	67	63	3411.23	100	2	28	10301.6		406.925	13.5447	1978-06-19	3004.3	0	0	0	0	100			14
1	1978-07-21	265	160	124	67	63	3411.23	100	2	32	10301.6		406.925	13.5447	1978-06-19	3004.3	0	0	50	0	50			14
1	1978-07-24	270	170	124	67	63	3411.23	100	3	35	10301.6		406.925	13.5447	1978-06-19	3004.3	0	0	50	0	50			14
1	1978-06-19	205	155	125	52	48	2018.48	0	1	0	6098.27		0	0	1978-06-19	2018.48	0	0	0	0	0			14
1	1978-06-23	190	170	125	52	48	2018.48	0	3	4	6098.27		0	0	1978-06-19	2018.48	0	0	0	0	0			14
1	1978-06-19	205	155	126	71	55	3204.54	0	1	0	9677.79		0	0	1978-06-19	3204.54	0	0	0	0	0			14
1	1978-06-23	190	170	126	72	66	3843.99	0	2	4	11607.7		639.454	19.9546	1978-06-19	3204.54	0	0	0	0	0			14
1	1978-06-25	190	140	126	73	67	3956.22	3	2	6	11946.4		751.681	23.4568	1978-06-19	3204.54	3	0	0	0	0			14
1	1978-06-30	210	170	126	73	69	4070.06	8	2	11	12289.9		865.523	27.0093	1978-06-19	3204.54	3	0	0	0	5			14
1	1978-07-04	230	225	126	73	69	4070.06	8	2	15	12289.9		865.523	27.0093	1978-06-19	3204.54	3	0	0	0	5			14
1	1978-07-09	200	180	126	73	69	4070.06	8	2	20	12289.9		865.523	27.0093	1978-06-19	3204.54	3	0	0	0	5			14
1	1978-07-13	220	150	126	73	69	4070.06	8	2	24	12289.9		865.523	27.0093	1978-06-19	3204.54	3	0	0	0	5			14
1	1978-07-17	255	160	126	73	69	4070.06	100	2	28	12289.9		865.523	27.0093	1978-06-19	3204.54	3	0	0	0	97			14
1	1978-07-21	265	160	126	73	69	4070.06	100	2	32	12289.9		865.523	27.0093	1978-06-19	3204.54	3	0	10	0	87			14
1	1978-07-24	270	170	126	73	69	4070.06	100	3	35	12289.9		865.523	27.0093	1978-06-19	3204.54	3	0	10	0	87			14
1	1978-06-19	205	155	127	55	46	2059.05	0	1	0	6220.72		0	0	1978-06-19	2059.05	0	0	0	0	0			14
1	1978-06-23	190	170	127	56	48	2183.19	0	2	4	6595.36		124.136	6.02882	1978-06-19	2059.05	0	0	0	0	0			14
1	1978-06-25	190	140	127	58	50	2354.35	0	2	6	7111.94		295.303	14.3417	1978-06-19	2059.05	0	0	0	0	0			14
1	1978-06-30	210	170	127	58	50	2354.35	0	2	11	7111.94		295.303	14.3417	1978-06-19	2059.05	0	0	0	0	0			14
1	1978-07-04	230	225	127	58	50	2354.35	0	2	15	7111.94		295.303	14.3417	1978-06-19	2059.05	0	0	0	0	0			14
1	1978-07-09	200	180	127	58	50	2354.35	50	2	20	7111.94		295.303	14.3417	1978-06-19	2059.05	0	0	0	0	50			14
1	1978-07-13	220	150	127	58	50	2354.35	60	2	24	7111.94		295.303	14.3417	1978-06-19	2059.05	0	0	0	0	60			14
1	1978-07-17	255	160	127	58	50	2354.35	100	2	28	7111.94		295.303	14.3417	1978-06-19	2059.05	0	0	30	0	70			14
1	1978-07-21	265	160	127	58	50	2354.35	100	3	32	7111.94		295.303	14.3417	1978-06-19	2059.05	0	0	30	0	70			14
1	1978-06-19	205	155	128	56	49	2225.37	0	1	0	6722.68		0	0	1978-06-19	2225.37	0	0	0	0	0			14
1	1978-06-23	190	170	128	58	50	2354.35	2	2	4	7111.94		128.981	5.79592	1978-06-19	2225.37	2	0	0	0	0			14
1	1978-06-25	190	140	128	61	53	2623.21	2	2	6	7923.37		397.842	17.8776	1978-06-19	2225.37	2	0	0	0	0			14
1	1978-06-30	210	170	128	61	53	2623.21	8	2	11	7923.37		397.842	17.8776	1978-06-19	2225.37	3	0	0	0	5			14
1	1978-07-04	230	225	128	61	54	2669.44	28	2	15	8062.87		444.065	19.9546	1978-06-19	2225.37	3	0	0	0	25			14
1	1978-07-09	200	180	128	61	54	2669.44	28	2	20	8062.87		444.065	19.9546	1978-06-19	2225.37	3	0	0	0	25			14
1	1978-07-13	220	150	128	62	54	2716.06	33	2	24	8203.59		490.692	22.0499	1978-06-19	2225.37	3	0	5	0	25			14
1	1978-07-17	255	160	128	62	54	2716.06	100	2	28	8203.59		490.692	22.0499	1978-06-19	2225.37	3	0	30	0	67			14
1	1978-07-21	265	160	128	62	54	2716.06	100	3	32	8203.59		490.692	22.0499	1978-06-19	2225.37	3	0	30	0	67			14
1	1978-06-19	205	155	129	79	73	4663.49	0	1	0	14080.9		0	0	1978-06-19	4663.49	0	0	0	0	0			14
1	1978-06-23	190	170	129	80	75	4849.39	0	2	4	14642		185.902	3.98632	1978-06-19	4663.49	0	0	0	0	0			14
1	1978-06-25	190	140	129	84	78	5297.29	15	2	6	15993.7		633.802	13.5907	1978-06-19	4663.49	0	0	0	0	15			14
1	1978-06-30	210	170	129	84	78	5297.29	100	2	11	15993.7		633.802	13.5907	1978-06-19	4663.49	0	0	0	0	100			14
1	1978-07-04	230	225	129	84	78	5297.29	100	2	15	15993.7		633.802	13.5907	1978-06-19	4663.49	0	0	0	0	100			14
1	1978-07-09	200	180	129	84	78	5297.29	100	2	20	15993.7		633.802	13.5907	1978-06-19	4663.49	0	0	60	0	40			14
1	1978-07-13	220	150	129	84	78	5297.29	100	3	24	15993.7		633.802	13.5907	1978-06-19	4663.49	0	0	60	0	40			14
1	1978-06-19	205	155	130	61	53	2623.21	0	1	0	7923.37		0	0	1978-06-19	2623.21	0	0	0	0	0			14
1	1978-06-23	190	170	130	63	54	2763.09	0	2	4	8345.53		139.881	5.33241	1978-06-19	2623.21	0	0	0	0	0			14
1	1978-06-25	190	140	130	65	56	2955.25	100	2	6	8925.46		332.04	12.6577	1978-06-19	2623.21	0	0	0	0	100			14
1	1978-06-30	210	170	130	65	56	2955.25	100	2	11	8925.46		332.04	12.6577	1978-06-19	2623.21	0	0	10	0	90			14
1	1978-07-04	230	225	130	65	56	2955.25	100	2	15	8925.46		332.04	12.6577	1978-06-19	2623.21	0	0	40	0	60			14
1	1978-07-09	200	180	130	65	56	2955.25	100	3	20	8925.46		332.04	12.6577	1978-06-19	2623.21	0	0	40	0	60			14
1	1978-06-19	205	155	131	60	59	2858.37	0	1	0	8633.06		0	0	1978-06-19	2858.37	0	0	0	0	0			14
1	1978-06-23	190	170	131	61	59	2906.61	0	2	4	8778.65		48.2416	1.68773	1978-06-19	2858.37	0	0	0	0	0			14
1	1978-06-25	190	140	131	65	63	3307.07	0	2	6	9987.26		448.708	15.698	1978-06-19	2858.37	0	0	0	0	0			14
1	1978-06-30	210	170	131	65	63	3307.07	45	2	11	9987.26		448.708	15.698	1978-06-19	2858.37	0	0	5	0	40			14
1	1978-07-04	230	225	131	65	63	3307.07	100	2	15	9987.26		448.708	15.698	1978-06-19	2858.37	0	0	10	0	90			14
1	1978-07-09	200	180	131	65	63	3307.07	100	2	20	9987.26		448.708	15.698	1978-06-19	2858.37	0	0	20	0	80			14
1	1978-07-13	220	150	131	65	63	3307.07	100	2	24	9987.26		448.708	15.698	1978-06-19	2858.37	0	10	10	0	80			14
1	1978-07-17	255	160	131	65	63	3307.07	100	2	28	9987.26		448.708	15.698	1978-06-19	2858.37	0	20	50	0	30			14
1	1978-07-21	265	160	131	65	63	3307.07	100	3	32	9987.26		448.708	15.698	1978-06-19	2858.37	0	20	50	0	30			14
1	1978-06-19	205	155	132	60	53	2577.39	0	1	0	7785.08		0	0	1978-06-19	2577.39	0	0	0	0	0			14
1	1978-06-23	190	170	132	62	55	2763.09	0	2	4	8345.53		185.7	7.20495	1978-06-19	2577.39	0	0	0	0	0			14
1	1978-06-25	190	140	132	64	57	2955.25	0	2	6	8925.46		377.859	14.6605	1978-06-19	2577.39	0	0	0	0	0			14
1	1978-06-30	210	170	132	65	57	3004.3	0	2	11	9073.49		426.908	16.5636	1978-06-19	2577.39	0	0	0	0	0			14
1	1978-07-04	230	225	132	65	57	3004.3	0	2	15	9073.49		426.908	16.5636	1978-06-19	2577.39	0	0	0	0	0			14
1	1978-07-09	200	180	132	65	57	3004.3	0	2	20	9073.49		426.908	16.5636	1978-06-19	2577.39	0	0	0	0	0			15
1	1978-07-13	220	150	132	65	57	3004.3	0	2	24	9073.49		426.908	16.5636	1978-06-19	2577.39	0	0	0	0	0			15
1	1978-07-17	255	160	132	65	57	3004.3	100	2	28	9073.49		426.908	16.5636	1978-06-19	2577.39	0	0	0	0	100			15
1	1978-07-21	265	160	132	65	57	3004.3	100	2	32	9073.49		426.908	16.5636	1978-06-19	2577.39	0	0	0	0	100			15
1	1978-07-24	270	170	132	65	57	3004.3	100	2	35	9073.49		426.908	16.5636	1978-06-19	2577.39	0	0	30	0	70			15
1	1978-07-27	260	185	132	65	57	3004.3	100	3	38	9073.49		426.908	16.5636	1978-06-19	2577.39	0	0	30	0	70			15
1	1978-06-23	190	170	133	76	69	4243.85	0	1	0	12814.4		0	0	1978-06-23	4243.85	0	0	0	0	0			15
1	1978-06-25	190	140	133	78	72	4541.58	0	2	2	13713		297.726	7.01546	1978-06-23	4243.85	0	0	0	0	0			15
1	1978-06-30	210	170	133	78	73	4602.33	0	2	7	13896.3		358.482	8.44709	1978-06-23	4243.85	0	0	0	0	0			15
1	1978-07-04	230	225	133	78	73	4602.33	0	2	11	13896.3		358.482	8.44709	1978-06-23	4243.85	0	0	0	0	0			15
1	1978-07-09	200	180	133	78	73	4602.33	0	2	16	13896.3		358.482	8.44709	1978-06-23	4243.85	0	0	0	0	0			15
1	1978-07-13	220	150	133	78	73	4602.33	0	2	20	13896.3		358.482	8.44709	1978-06-23	4243.85	0	0	0	0	0			15
1	1978-07-17	255	160	133	78	73	4602.33	0	2	24	13896.3		358.482	8.44709	1978-06-23	4243.85	0	0	0	0	0			15
1	1978-07-21	265	160	133	78	73	4602.33	5	2	28	13896.3		358.482	8.44709	1978-06-23	4243.85	0	0	0	0	5			15
1	1978-07-24	270	170	133	78	73	4602.33	80	2	31	13896.3		358.482	8.44709	1978-06-23	4243.85	0	0	20	0	60			15
1	1978-07-27	260	185	133	78	73	4602.33	80	3	34	13896.3		358.482	8.44709	1978-06-23	4243.85	0	0	20	0	60			15
1	1978-06-23	190	170	134	74	65	3899.9	0	1	0	11776.4		0	0	1978-06-23	3899.9	0	0	0	0	0			15
1	1978-06-25	190	140	134	77	68	4243.85	0	2	2	12814.4		343.949	8.81942	1978-06-23	3899.9	0	0	0	0	0			15
1	1978-06-30	210	170	134	77	68	4243.85	0	3	7	12814.4		343.949	8.81942	1978-06-23	3899.9	0	0	0	0	0			15
1	1978-06-23	190	170	135	52	48	2018.48	0	1	0	6098.27		0	0	1978-06-23	2018.48	0	0	0	0	0			15
1	1978-06-25	190	140	135	55	50	2225.37	0	2	2	6722.68		206.894	10.25	1978-06-23	2018.48	0	0	0	0	0			15
1	1978-06-30	210	170	135	55	51	2267.96	100	2	7	6851.21		249.484	12.36	1978-06-23	2018.48	0	0	0	0	100			15
1	1978-07-04	230	225	135	55	51	2267.96	100	2	11	6851.21		249.484	12.36	1978-06-23	2018.48	0	0	0	0	100			15
1	1978-07-09	200	180	135	55	51	2267.96	100	2	16	6851.21		249.484	12.36	1978-06-23	2018.48	0	0	0	0	100			15
1	1978-07-13	220	150	135	55	51	2267.96	100	2	20	6851.21		249.484	12.36	1978-06-23	2018.48	0	0	0	0	100			15
1	1978-07-17	255	160	135	55	51	2267.96	100	2	24	6851.21		249.484	12.36	1978-06-23	2018.48	0	0	0	0	100			15
1	1978-07-21	265	160	135	55	51	2267.96	100	3	28	6851.21		249.484	12.36	1978-06-23	2018.48	0	0	0	0	100			15
1	1978-06-23	190	170	136	56	53	2398.15	0	1	0	7244.13		0	0	1978-06-23	2398.15	0	0	0	0	0			15
1	1978-06-25	190	140	136	55	54	2398.15	0	2	2	7244.13		0	0	1978-06-23	2398.15	0	0	0	0	0			15
1	1978-06-30	210	170	136	57	54	2486.97	100	2	7	7512.17		88.813	3.70339	1978-06-23	2398.15	0	0	0	0	100			15
1	1978-07-04	230	225	136	57	55	2531.98	100	2	11	7648.02		133.825	5.58034	1978-06-23	2398.15	0	0	0	0	100			15
1	1978-07-09	200	180	136	58	55	2577.39	100	2	16	7785.08		179.241	7.47412	1978-06-23	2398.15	0	0	20	0	80			15
1	1978-07-13	220	150	136	58	55	2577.39	100	2	20	7785.08		179.241	7.47412	1978-06-23	2398.15	0	0	70	0	30			15
1	1978-07-17	255	160	136	58	55	2577.39	100	3	24	7785.08		179.241	7.47412	1978-06-23	2398.15	0	0	70	0	30			15
1	1978-06-23	190	170	137	58	49	2310.96	0	1	0	6980.97		0	0	1978-06-23	2310.96	0	0	0	0	0			15
1	1978-06-25	190	140	137	64	55	2858.37	0	2	2	8633.06		547.411	23.6877	1978-06-23	2310.96	0	0	0	0	0			15
1	1978-06-30	210	170	137	64	55	2858.37	0	2	7	8633.06		547.411	23.6877	1978-06-23	2310.96	0	0	0	0	0			15
1	1978-07-04	230	225	137	64	55	2858.37	0	2	11	8633.06		547.411	23.6877	1978-06-23	2310.96	0	0	0	0	0			15
1	1978-07-09	200	180	137	64	55	2858.37	0	2	16	8633.06		547.411	23.6877	1978-06-23	2310.96	0	0	0	0	0			15
1	1978-07-13	220	150	137	64	55	2858.37	0	2	20	8633.06		547.411	23.6877	1978-06-23	2310.96	0	0	0	0	0			15
1	1978-07-17	255	160	137	64	55	2858.37	0	2	24	8633.06		547.411	23.6877	1978-06-23	2310.96	0	0	0	0	0			15
1	1978-07-21	265	160	137	64	55	2858.37	0	2	28	8633.06		547.411	23.6877	1978-06-23	2310.96	0	0	0	0	0			15
1	1978-07-24	270	170	137	64	55	2858.37	35	2	31	8633.06		547.411	23.6877	1978-06-23	2310.96	0	0	0	5	30			15
1	1978-07-27	260	185	137	64	55	2858.37	100	2	34	8633.06		547.411	23.6877	1978-06-23	2310.96	0	0	0	5	95			15
1	1978-08-01	300	190	137	65	55	2906.61	100	2	39	8778.65		595.653	25.7752	1978-06-23	2310.96	0	0	60	10	30			15
1	1978-08-03	260	195	137	65	55	2906.61	100	3	41	8778.65		595.653	25.7752	1978-06-23	2310.96	0	0	60	10	30			15
1	1978-06-23	190	170	138	75	72	4361.73	0	1	0	13170.2		0	0	1978-06-23	4361.73	0	0	0	0	0			15
1	1978-06-25	190	140	138	78	76	4787.02	0	2	2	14453.7		425.293	9.75057	1978-06-23	4361.73	0	0	0	0	0			15
1	1978-06-30	210	170	138	78	76	4787.02	0	2	7	14453.7		425.293	9.75057	1978-06-23	4361.73	0	0	0	0	0			15
1	1978-07-04	230	225	138	78	76	4787.02	0	2	11	14453.7		425.293	9.75057	1978-06-23	4361.73	0	0	0	0	0			15
1	1978-07-09	200	180	138	78	76	4787.02	0	2	16	14453.7		425.293	9.75057	1978-06-23	4361.73	0	0	0	0	0			15
1	1978-07-13	220	150	138	78	76	4787.02	0	2	20	14453.7		425.293	9.75057	1978-06-23	4361.73	0	0	0	0	0			15
1	1978-07-17	255	160	138	78	76	4787.02	0	2	24	14453.7		425.293	9.75057	1978-06-23	4361.73	0	0	0	0	0			15
1	1978-07-21	265	160	138	78	76	4787.02	10	2	28	14453.7		425.293	9.75057	1978-06-23	4361.73	0	0	0	0	10			15
1	1978-07-24	270	170	138	78	76	4787.02	50	2	31	14453.7		425.293	9.75057	1978-06-23	4361.73	0	0	10	0	40			15
1	1978-07-27	260	185	138	78	76	4787.02	50	3	34	14453.7		425.293	9.75057	1978-06-23	4361.73	0	0	10	0	40			15
1	1978-06-23	190	170	139	55	48	2141.4	0	1	0	6469.26		0	0	1978-06-23	2141.4	0	0	0	0	0			15
1	1978-06-25	190	140	139	55	48	2141.4	0	3	2	6469.26		0	0	1978-06-23	2141.4	0	0	0	0	0			15
1	1978-06-23	190	170	140	69	60	3358.95	0	1	0	10143.8		0	0	1978-06-23	3358.95	0	0	0	0	0			15
1	1978-06-25	190	140	140	73	64	3788.48	0	2	2	11440.1		429.532	12.7877	1978-06-23	3358.95	0	0	0	0	0			15
1	1978-06-30	210	170	140	75	64	3899.9	0	2	7	11776.4		540.952	16.1048	1978-06-23	3358.95	0	0	0	0	0			15
1	1978-07-04	230	225	140	75	65	3956.22	0	2	11	11946.4		597.268	17.7814	1978-06-23	3358.95	0	0	0	0	0			16
1	1978-07-09	200	180	140	75	65	3956.22	0	2	16	11946.4		597.268	17.7814	1978-06-23	3358.95	0	0	0	0	0			16
1	1978-07-13	220	150	140	75	65	3956.22	0	2	20	11946.4		597.268	17.7814	1978-06-23	3358.95	0	0	0	0	0			16
1	1978-07-17	255	160	140	75	65	3956.22	0	2	24	11946.4		597.268	17.7814	1978-06-23	3358.95	0	0	0	0	0			16
1	1978-07-21	265	160	140	75	65	3956.22	100	2	28	11946.4		597.268	17.7814	1978-06-23	3358.95	0	0	0	0	100			16
1	1978-07-24	270	170	140	75	65	3956.22	100	2	31	11946.4		597.268	17.7814	1978-06-23	3358.95	0	0	10	0	90			16
1	1978-07-27	260	185	140	75	65	3956.22	100	3	34	11946.4		597.268	17.7814	1978-06-23	3358.95	0	0	10	0	90			16
1	1978-06-23	190	170	141	71	62	3570.49	0	1	0	10782.2		0	0	1978-06-23	3570.49	0	0	0	0	0			16
1	1978-06-25	190	140	141	72	63	3678.68	0	2	2	11108.8		108.19	3.03013	1978-06-23	3570.49	0	0	0	0	0			16
1	1978-06-30	210	170	141	75	64	3899.9	0	2	7	11776.4		329.416	9.22607	1978-06-23	3570.49	0	0	0	0	0			16
1	1978-07-04	230	225	141	76	65	4012.94	0	2	11	12117.5		442.45	12.3919	1978-06-23	3570.49	0	0	0	0	0			16
1	1978-07-09	200	180	141	76	65	4012.94	0	2	16	12117.5		442.45	12.3919	1978-06-23	3570.49	0	0	0	0	0			16
1	1978-07-13	220	150	141	77	65	4070.06	10	2	20	12289.9		499.573	13.9917	1978-06-23	3570.49	0	0	0	0	10			16
1	1978-07-17	255	160	141	77	65	4070.06	100	2	24	12289.9		499.573	13.9917	1978-06-23	3570.49	0	0	0	0	100			16
1	1978-07-21	265	160	141	77	65	4070.06	100	2	28	12289.9		499.573	13.9917	1978-06-23	3570.49	0	0	10	0	90			16
1	1978-07-24	270	170	141	77	66	4127.59	100	2	31	12463.6		557.1	15.6029	1978-06-23	3570.49	0	10	60	0	30			16
1	1978-07-27	260	185	141	77	66	4127.59	100	3	34	12463.6		557.1	15.6029	1978-06-23	3570.49	0	10	60	0	30			16
1	1978-06-23	190	170	142	80	69	4481.22	0	1	0	13530.8		0	0	1978-06-23	4481.22	0	0	0	0	0			16
1	1978-06-25	190	140	142	83	71	4787.02	10	2	2	14453.7		305.799	6.82402	1978-06-23	4481.22	0	0	0	0	10			16
1	1978-06-30	210	170	142	83	71	4787.02	10	2	7	14453.7		305.799	6.82402	1978-06-23	4481.22	0	0	0	0	10			16
1	1978-07-04	230	225	142	83	71	4787.02	10	2	11	14453.7		305.799	6.82402	1978-06-23	4481.22	0	0	0	0	10			16
1	1978-07-09	200	180	142	83	71	4787.02	20	2	16	14453.7		305.799	6.82402	1978-06-23	4481.22	0	0	0	0	20			16
1	1978-07-13	220	150	142	83	71	4787.02	100	2	20	14453.7		305.799	6.82402	1978-06-23	4481.22	0	0	0	0	100			16
1	1978-07-17	255	160	142	83	71	4787.02	100	3	24	14453.7		305.799	6.82402	1978-06-23	4481.22	0	0	0	0	100			16
1	1978-06-23	190	170	143	66	60	3204.54	0	1	0	9677.79		0	0	1978-06-23	3204.54	0	0	0	0	0			16
1	1978-06-25	190	140	143	66	60	3204.54	0	2	2	9677.79		0	0	1978-06-23	3204.54	0	0	0	0	0			16
1	1978-06-30	210	170	143	66	60	3204.54	5	2	7	9677.79		0	0	1978-06-23	3204.54	0	0	5	0	0			16
1	1978-07-04	230	225	143	66	60	3204.54	5	2	11	9677.79		0	0	1978-06-23	3204.54	0	0	5	0	0			16
1	1978-07-09	200	180	143	66	60	3204.54	5	2	16	9677.79		0	0	1978-06-23	3204.54	0	0	5	0	0			16
1	1978-07-13	220	150	143	67	61	3307.07	10	2	20	9987.26		102.539	3.1998	1978-06-23	3204.54	0	0	5	0	5			16
1	1978-07-17	255	160	143	67	61	3307.07	100	2	24	9987.26		102.539	3.1998	1978-06-23	3204.54	0	0	10	0	90			16
1	1978-07-21	265	160	143	67	61	3307.07	100	2	28	9987.26		102.539	3.1998	1978-06-23	3204.54	0	5	30	0	65			16
1	1978-07-24	270	170	143	67	61	3307.07	100	3	31	9987.26		102.539	3.1998	1978-06-23	3204.54	0	5	30	0	65			16
1	1978-06-23	190	170	144	73	65	3843.99	0	1	0	11607.7		0	0	1978-06-23	3843.99	0	0	0	0	0			16
1	1978-06-25	190	140	144	73	66	3899.9	0	2	2	11776.4		55.9118	1.45453	1978-06-23	3843.99	0	0	0	0	0			16
1	1978-06-30	210	170	144	73	66	3899.9	0	2	7	11776.4		55.9118	1.45453	1978-06-23	3843.99	0	0	0	0	0			16
1	1978-07-04	230	225	144	73	66	3899.9	0	2	11	11776.4		55.9118	1.45453	1978-06-23	3843.99	0	0	0	0	0			16
1	1978-07-09	200	180	144	73	66	3899.9	0	2	16	11776.4		55.9118	1.45453	1978-06-23	3843.99	0	0	0	0	0			16
1	1978-07-13	220	150	144	73	66	3899.9	0	2	20	11776.4		55.9118	1.45453	1978-06-23	3843.99	0	0	0	0	0			16
1	1978-07-17	255	160	144	73	66	3899.9	10	2	24	11776.4		55.9118	1.45453	1978-06-23	3843.99	0	0	0	0	10			16
1	1978-07-21	265	160	144	73	66	3899.9	100	2	28	11776.4		55.9118	1.45453	1978-06-23	3843.99	0	0	0	0	100			16
1	1978-07-24	270	170	144	73	66	3899.9	100	2	31	11776.4		55.9118	1.45453	1978-06-23	3843.99	0	0	15	0	85			16
1	1978-07-27	260	185	144	73	66	3899.9	100	2	34	11776.4		55.9118	1.45453	1978-06-23	3843.99	0	0	30	0	70			16
1	1978-08-01	300	190	144	73	66	3899.9	100	3	39	11776.4		55.9118	1.45453	1978-06-23	3843.99	0	0	30	0	70			16
1	1978-06-23	190	170	145	64	54	2810.53	0	1	0	8488.68		0	0	1978-06-23	2810.53	0	0	0	0	0			16
1	1978-06-25	190	140	145	65	54	2858.37	0	2	2	8633.06		47.8379	1.7021	1978-06-23	2810.53	0	0	0	0	0			16
1	1978-06-30	210	170	145	65	54	2858.37	0	2	7	8633.06		47.8379	1.7021	1978-06-23	2810.53	0	0	0	0	0			16
1	1978-07-04	230	225	145	65	54	2858.37	0	2	11	8633.06		47.8379	1.7021	1978-06-23	2810.53	0	0	0	0	0			16
1	1978-07-09	200	180	145	65	55	2906.61	0	2	16	8778.65		96.0796	3.41856	1978-06-23	2810.53	0	0	0	0	0			16
1	1978-07-13	220	150	145	65	55	2906.61	20	2	20	8778.65		96.0796	3.41856	1978-06-23	2810.53	0	0	0	0	20			16
1	1978-07-17	255	160	145	65	55	2906.61	100	2	24	8778.65		96.0796	3.41856	1978-06-23	2810.53	0	0	0	0	100			16
1	1978-07-21	265	160	145	65	55	2906.61	100	3	28	8778.65		96.0796	3.41856	1978-06-23	2810.53	0	0	0	0	100			16
1	1978-06-23	190	170	146	84	68	4663.49	0	1	0	14080.9		0	0	1978-06-23	4663.49	0	0	0	0	0			16
1	1978-06-25	190	140	146	84	68	4663.49	0	2	2	14080.9		0	0	1978-06-23	4663.49	0	0	0	0	0			16
1	1978-06-30	210	170	146	84	68	4663.49	60	2	7	14080.9		0	0	1978-06-23	4663.49	0	0	0	0	60			16
1	1978-07-04	230	225	146	84	68	4663.49	100	2	11	14080.9		0	0	1978-06-23	4663.49	0	0	0	0	100			16
1	1978-07-09	200	180	146	84	68	4663.49	100	2	16	14080.9		0	0	1978-06-23	4663.49	0	0	10	0	90			16
1	1978-07-13	220	150	146	84	68	4663.49	100	2	20	14080.9		0	0	1978-06-23	4663.49	0	0	15	0	85			16
1	1978-07-17	255	160	146	84	68	4663.49	100	2	24	14080.9		0	0	1978-06-23	4663.49	0	0	50	0	50			16
1	1978-07-21	265	160	146	84	68	4663.49	100	3	28	14080.9		0	0	1978-06-23	4663.49	0	0	50	0	50			16
1	1978-06-23	190	170	147	79	72	4602.33	0	1	0	13896.3		0	0	1978-06-23	4602.33	0	0	0	0	0			16
1	1978-06-25	190	140	147	79	72	4602.33	0	2	2	13896.3		0	0	1978-06-23	4602.33	0	0	0	0	0			17
1	1978-06-30	210	170	147	79	72	4602.33	0	2	7	13896.3		0	0	1978-06-23	4602.33	0	0	0	0	0			17
1	1978-07-04	230	225	147	79	72	4602.33	5	2	11	13896.3		0	0	1978-06-23	4602.33	0	0	0	0	5			17
1	1978-07-09	200	180	147	79	72	4602.33	25	2	16	13896.3		0	0	1978-06-23	4602.33	0	0	0	0	25			17
1	1978-07-13	220	150	147	79	72	4602.33	50	2	20	13896.3		0	0	1978-06-23	4602.33	0	0	10	0	40			17
1	1978-07-17	255	160	147	79	72	4602.33	50	3	24	13896.3		0	0	1978-06-23	4602.33	0	0	10	0	40			17
1	1978-06-23	190	170	148	76	64	3956.22	0	1	0	11946.4		0	0	1978-06-23	3956.22	0	0	0	0	0			17
1	1978-06-25	190	140	148	76	64	3956.22	0	2	2	11946.4		0	0	1978-06-23	3956.22	0	0	0	0	0			17
1	1978-06-30	210	170	148	76	64	3956.22	10	2	7	11946.4		0	0	1978-06-23	3956.22	0	0	0	0	10			17
1	1978-07-04	230	225	148	76	65	4012.94	10	2	11	12117.5		56.7192	1.43367	1978-06-23	3956.22	0	0	0	0	10			17
1	1978-07-09	200	180	148	76	65	4012.94	10	2	16	12117.5		56.7192	1.43367	1978-06-23	3956.22	0	0	0	0	10			17
1	1978-07-13	220	150	148	76	65	4012.94	10	2	20	12117.5		56.7192	1.43367	1978-06-23	3956.22	0	0	0	0	10			17
1	1978-07-17	255	160	148	76	65	4012.94	40	2	24	12117.5		56.7192	1.43367	1978-06-23	3956.22	0	0	0	0	40			17
1	1978-07-21	265	160	148	76	65	4012.94	100	2	28	12117.5		56.7192	1.43367	1978-06-23	3956.22	0	0	20	0	80			17
1	1978-07-24	270	170	148	76	65	4012.94	100	2	31	12117.5		56.7192	1.43367	1978-06-23	3956.22	0	5	40	5	50			17
1	1978-07-27	260	185	148	76	65	4012.94	100	2	34	12117.5		56.7192	1.43367	1978-06-23	3956.22	0	5	60	5	30			17
1	1978-08-01	300	190	148	76	65	4012.94	100	2	39	12117.5		56.7192	1.43367	1978-06-23	3956.22	0	30	30	5	35			17
1	1978-08-03	260	195	148	76	65	4012.94	100	3	41	12117.5		56.7192	1.43367	1978-06-23	3956.22	0	30	30	5	35			17
1	1978-06-23	190	170	149	67	67	3624.38	0	1	0	10944.9		0	0	1978-06-23	3624.38	0	0	0	0	0			17
1	1978-06-25	190	140	149	67	67	3624.38	5	2	2	10944.9		0	0	1978-06-23	3624.38	0	0	0	0	5			17
1	1978-06-30	210	170	149	67	67	3624.38	20	2	7	10944.9		0	0	1978-06-23	3624.38	0	0	10	0	10			17
1	1978-07-04	230	225	149	67	67	3624.38	50	2	11	10944.9		0	0	1978-06-23	3624.38	0	0	10	0	40			17
1	1978-07-09	200	180	149	67	67	3624.38	95	2	16	10944.9		0	0	1978-06-23	3624.38	0	0	20	0	75			17
1	1978-07-13	220	150	149	67	67	3624.38	100	2	20	10944.9		0	0	1978-06-23	3624.38	0	0	20	0	80			17
1	1978-07-17	255	160	149	67	67	3624.38	100	3	24	10944.9		0	0	1978-06-23	3624.38	0	0	20	0	80			17
1	1978-06-23	190	170	150	70	69	3899.9	0	1	0	11776.4		0	0	1978-06-23	3899.9	0	0	0	0	0			17
1	1978-06-25	190	140	150	71	70	4012.94	0	2	2	12117.5		113.035	2.8984	1978-06-23	3899.9	0	0	0	0	0			17
1	1978-06-30	210	170	150	71	70	4012.94	40	2	7	12117.5		113.035	2.8984	1978-06-23	3899.9	0	0	0	0	40			17
1	1978-07-04	230	225	150	71	70	4012.94	50	2	11	12117.5		113.035	2.8984	1978-06-23	3899.9	0	0	0	0	50			17
1	1978-07-09	200	180	150	71	70	4012.94	60	2	16	12117.5		113.035	2.8984	1978-06-23	3899.9	0	0	0	0	60			17
1	1978-07-13	220	150	150	71	70	4012.94	60	2	20	12117.5		113.035	2.8984	1978-06-23	3899.9	0	0	30	0	30			17
1	1978-07-17	255	160	150	71	70	4012.94	70	2	24	12117.5		113.035	2.8984	1978-06-23	3899.9	0	0	40	0	30			17
1	1978-07-21	265	160	150	71	70	4012.94	100	2	28	12117.5		113.035	2.8984	1978-06-23	3899.9	0	0	60	0	40			17
1	1978-07-24	270	170	150	71	70	4012.94	100	3	31	12117.5		113.035	2.8984	1978-06-23	3899.9	0	0	60	0	40			17
1	1978-06-23	190	170	151	73	65	3843.99	0	1	0	11607.7		0	0	1978-06-23	3843.99	0	0	0	0	0			17
1	1978-06-25	190	140	151	73	65	3843.99	0	3	2	11607.7		0	0	1978-06-23	3843.99	0	0	0	0	0			17
1	1978-06-23	190	170	152	64	54	2810.53	0	1	0	8488.68		0	0	1978-06-23	2810.53	0	0	0	0	0			17
1	1978-06-25	190	140	152	64	54	2810.53	0	2	2	8488.68		0	0	1978-06-23	2810.53	0	0	0	0	0			17
1	1978-06-30	210	170	152	65	56	2955.25	0	2	7	8925.46		144.725	5.14938	1978-06-23	2810.53	0	0	0	0	0			17
1	1978-07-04	230	225	152	65	57	3004.3	0	2	11	9073.49		193.774	6.89457	1978-06-23	2810.53	0	0	0	0	0			17
1	1978-07-09	200	180	152	65	57	3004.3	0	2	16	9073.49		193.774	6.89457	1978-06-23	2810.53	0	0	0	0	0			17
1	1978-07-13	220	150	152	65	57	3004.3	0	2	20	9073.49		193.774	6.89457	1978-06-23	2810.53	0	0	0	0	0			17
1	1978-07-17	255	160	152	65	57	3004.3	0	2	24	9073.49		193.774	6.89457	1978-06-23	2810.53	0	0	0	0	0			17
1	1978-07-21	265	160	152	65	57	3004.3	100	2	28	9073.49		193.774	6.89457	1978-06-23	2810.53	0	0	0	0	100			17
1	1978-07-24	270	170	152	65	57	3004.3	100	2	31	9073.49		193.774	6.89457	1978-06-23	2810.53	0	0	60	0	40			17
1	1978-07-27	260	185	152	65	57	3004.3	100	3	34	9073.49		193.774	6.89457	1978-06-23	2810.53	0	0	60	0	40			17
1	1978-06-23	190	170	153	50	45	1821.68	0	1	0	5504.33		0	0	1978-06-23	1821.68	0	0	0	0	0			17
1	1978-06-25	190	140	153	51	45	1860.23	0	2	2	5620.68		38.5529	2.11634	1978-06-23	1821.68	0	0	0	0	0			17
1	1978-06-30	210	170	153	51	45	1860.23	0	2	7	5620.68		38.5529	2.11634	1978-06-23	1821.68	0	0	0	0	0			17
1	1978-07-04	230	225	153	51	45	1860.23	0	2	11	5620.68		38.5529	2.11634	1978-06-23	1821.68	0	0	0	0	0			17
1	1978-07-09	200	180	153	51	45	1860.23	0	2	16	5620.68		38.5529	2.11634	1978-06-23	1821.68	0	0	0	0	0			17
1	1978-07-13	220	150	153	51	46	1899.19	20	2	20	5738.25		77.5096	4.25485	1978-06-23	1821.68	0	0	0	0	20			17
1	1978-07-17	255	160	153	52	46	1938.55	100	2	24	5857.04		116.87	6.41551	1978-06-23	1821.68	0	0	0	0	100			17
1	1978-07-21	265	160	153	52	46	1938.55	100	3	28	5857.04		116.87	6.41551	1978-06-23	1821.68	0	0	0	0	100			17
1	1978-06-23	190	170	154	54	47	2059.05	0	1	0	6220.72		0	0	1978-06-23	2059.05	0	0	0	0	0			17
1	1978-06-25	190	140	154	55	48	2141.4	0	2	2	6469.26		82.3539	3.99961	1978-06-23	2059.05	0	0	0	0	0			17
1	1978-06-30	210	170	154	57	48	2225.37	0	2	7	6722.68		166.323	8.07764	1978-06-23	2059.05	0	0	0	0	0			17
1	1978-07-04	230	225	154	57	48	2225.37	0	2	11	6722.68		166.323	8.07764	1978-06-23	2059.05	0	0	0	0	0			17
1	1978-07-09	200	180	154	57	49	2267.96	0	2	16	6851.21		208.912	10.1461	1978-06-23	2059.05	0	0	0	0	0			17
1	1978-07-13	220	150	154	57	49	2267.96	0	2	20	6851.21		208.912	10.1461	1978-06-23	2059.05	0	0	0	0	0			17
1	1978-07-17	255	160	154	57	49	2267.96	100	2	24	6851.21		208.912	10.1461	1978-06-23	2059.05	0	0	0	0	100			17
1	1978-07-21	265	160	154	57	49	2267.96	100	3	28	6851.21		208.912	10.1461	1978-06-23	2059.05	0	0	0	0	100			18
1	1978-06-23	190	170	155	52	46	1938.55	0	1	0	5857.04		0	0	1978-06-23	1938.55	0	0	0	0	0			18
1	1978-06-25	190	140	155	52	46	1938.55	99	2	2	5857.04		0	0	1978-06-23	1938.55	0	99	0	0	0			18
1	1978-06-30	210	170	155	52	46	1938.55	99	3	7	5857.04		0	0	1978-06-23	1938.55	0	99	0	0	0			18
1	1978-06-23	190	170	156	58	51	2398.15	100	1	0	7244.13		0	0	1978-06-23	2398.15	0	0	0	0	100			18
1	1978-06-25	190	140	156	58	51	2398.15	100	3	2	7244.13		0	0	1978-06-23	2398.15	0	0	0	0	100			18
1	1978-06-25	190	140	157	69	61	3411.23	0	1	0	10301.6		0	0	1978-06-25	3411.23	0	0	0	0	0			18
1	1978-06-30	210	170	157	71	63	3624.38	0	2	5	10944.9		213.151	6.24852	1978-06-25	3411.23	0	0	0	0	0			18
1	1978-07-04	230	225	157	72	63	3678.68	0	2	9	11108.8		267.448	7.84024	1978-06-25	3411.23	0	0	0	0	0			18
1	1978-07-09	200	180	157	72	63	3678.68	0	2	14	11108.8		267.448	7.84024	1978-06-25	3411.23	0	0	0	0	0			18
1	1978-07-13	220	150	157	72	63	3678.68	0	2	18	11108.8		267.448	7.84024	1978-06-25	3411.23	0	0	0	0	0			18
1	1978-07-17	255	160	157	73	63	3733.38	0	2	22	11273.8		322.149	9.44379	1978-06-25	3411.23	0	0	0	0	0			18
1	1978-07-21	265	160	157	73	63	3733.38	0	2	26	11273.8		322.149	9.44379	1978-06-25	3411.23	0	0	0	0	0			18
1	1978-07-24	270	170	157	73	63	3733.38	0	2	29	11273.8		322.149	9.44379	1978-06-25	3411.23	0	0	0	0	0			18
1	1978-07-27	260	185	157	73	63	3733.38	0	2	32	11273.8		322.149	9.44379	1978-06-25	3411.23	0	0	0	0	0			18
1	1978-08-01	300	190	157	73	63	3733.38	0	2	37	11273.8		322.149	9.44379	1978-06-25	3411.23	0	0	0	0	0			18
1	1978-08-03	260	195	157	73	65	3843.99	0	2	39	11607.7		432.762	12.6864	1978-06-25	3411.23	0	0	0	0	0			18
1	1978-08-09	210	170	157	73	65	3843.99	41	2	45	11607.7		432.762	12.6864	1978-06-25	3411.23	0	0	0	1	40			18
1	1978-08-13	190	165	157	74	65	3899.9	60	2	49	11776.4		488.674	14.3254	1978-06-25	3411.23	0	0	0	10	50			18
1	1978-08-18	235	180	157	74	65	3899.9	60	3	54	11776.4		488.674	14.3254	1978-06-25	3411.23	0	0	0	10	50			18
1	1978-06-25	190	140	158	58	49	2310.96	0	1	0	6980.97		0	0	1978-06-25	2310.96	0	0	0	0	0			18
1	1978-06-30	210	170	158	61	55	2716.06	0	2	5	8203.59		405.109	17.5299	1978-06-25	2310.96	0	0	0	0	0			18
1	1978-07-04	230	225	158	61	55	2716.06	0	2	9	8203.59		405.109	17.5299	1978-06-25	2310.96	0	0	0	0	0			18
1	1978-07-09	200	180	158	61	55	2716.06	0	2	14	8203.59		405.109	17.5299	1978-06-25	2310.96	0	0	0	0	0			18
1	1978-07-13	220	150	158	61	55	2716.06	0	2	18	8203.59		405.109	17.5299	1978-06-25	2310.96	0	0	0	0	0			18
1	1978-07-17	255	160	158	61	55	2716.06	0	2	22	8203.59		405.109	17.5299	1978-06-25	2310.96	0	0	0	0	0			18
1	1978-07-21	265	160	158	61	55	2716.06	40	2	26	8203.59		405.109	17.5299	1978-06-25	2310.96	0	0	0	0	40			18
1	1978-07-24	270	170	158	61	55	2716.06	40	3	29	8203.59		405.109	17.5299	1978-06-25	2310.96	0	0	0	0	40			18
1	1978-06-25	190	140	159	66	62	3307.07	0	1	0	9987.26		0	0	1978-06-25	3307.07	0	0	0	0	0			18
1	1978-06-30	210	170	159	67	62	3358.95	0	2	5	10143.8		51.8749	1.5686	1978-06-25	3307.07	0	0	0	0	0			18
1	1978-07-04	230	225	159	67	62	3358.95	0	2	9	10143.8		51.8749	1.5686	1978-06-25	3307.07	0	0	0	0	0			18
1	1978-07-09	200	180	159	67	62	3358.95	0	2	14	10143.8		51.8749	1.5686	1978-06-25	3307.07	0	0	0	0	0			18
1	1978-07-13	220	150	159	67	62	3358.95	0	2	18	10143.8		51.8749	1.5686	1978-06-25	3307.07	0	0	0	0	0			18
1	1978-07-17	255	160	159	67	64	3463.91	0	2	22	10460.6		156.836	4.74243	1978-06-25	3307.07	0	0	0	0	0			18
1	1978-07-21	265	160	159	67	64	3463.91	0	2	26	10460.6		156.836	4.74243	1978-06-25	3307.07	0	0	0	0	0			18
1	1978-07-24	270	170	159	67	64	3463.91	20	2	29	10460.6		156.836	4.74243	1978-06-25	3307.07	0	0	0	0	20			18
1	1978-07-27	260	185	159	67	64	3463.91	100	2	32	10460.6		156.836	4.74243	1978-06-25	3307.07	0	0	15	0	85			18
1	1978-08-01	300	190	159	67	64	3463.91	100	2	37	10460.6		156.836	4.74243	1978-06-25	3307.07	0	20	60	0	20			18
1	1978-08-03	260	195	159	67	64	3463.91	100	3	39	10460.6		156.836	4.74243	1978-06-25	3307.07	0	20	60	0	20			18
1	1978-06-25	190	140	160	60	57	2763.09	0	1	0	8345.53		0	0	1978-06-25	2763.09	0	0	0	0	0			18
1	1978-06-30	210	170	160	63	59	3004.3	0	2	5	9073.49		241.208	8.72964	1978-06-25	2763.09	0	0	0	0	0			18
1	1978-07-04	230	225	160	63	59	3004.3	0	2	9	9073.49		241.208	8.72964	1978-06-25	2763.09	0	0	0	0	0			18
1	1978-07-09	200	180	160	63	60	3053.76	0	2	14	9222.74		290.661	10.5194	1978-06-25	2763.09	0	0	0	0	0			18
1	1978-07-13	220	150	160	63	60	3053.76	0	2	18	9222.74		290.661	10.5194	1978-06-25	2763.09	0	0	0	0	0			18
1	1978-07-17	255	160	160	63	60	3053.76	0	2	22	9222.74		290.661	10.5194	1978-06-25	2763.09	0	0	0	0	0			18
1	1978-07-21	265	160	160	64	61	3153.87	15	2	26	9524.89		390.777	14.1427	1978-06-25	2763.09	0	0	0	0	15			18
1	1978-07-24	270	170	160	64	61	3153.87	20	2	29	9524.89		390.777	14.1427	1978-06-25	2763.09	0	0	0	0	20			18
1	1978-07-27	260	185	160	64	61	3153.87	20	2	32	9524.89		390.777	14.1427	1978-06-25	2763.09	0	0	0	0	20			18
1	1978-08-01	300	190	160	64	61	3153.87	25	2	37	9524.89		390.777	14.1427	1978-06-25	2763.09	0	0	0	0	25			18
1	1978-08-03	260	195	160	64	61	3153.87	45	2	39	9524.89		390.777	14.1427	1978-06-25	2763.09	0	0	20	5	20			18
1	1978-08-09	210	170	160	64	61	3153.87	80	2	45	9524.89		390.777	14.1427	1978-06-25	2763.09	0	0	30	10	40			18
1	1978-08-13	190	165	160	64	61	3153.87	80	3	49	9524.89		390.777	14.1427	1978-06-25	2763.09	0	0	30	10	40			18
1	1978-06-25	190	140	161	55	49	2183.19	0	1	0	6595.36		0	0	1978-06-25	2183.19	0	0	0	0	0			18
1	1978-06-30	210	170	161	56	50	2267.96	0	2	5	6851.21		84.7761	3.88314	1978-06-25	2183.19	0	0	0	0	0			18
1	1978-07-04	230	225	161	56	50	2267.96	0	2	9	6851.21		84.7761	3.88314	1978-06-25	2183.19	0	0	0	0	0			18
1	1978-07-09	200	180	161	56	50	2267.96	0	2	14	6851.21		84.7761	3.88314	1978-06-25	2183.19	0	0	0	0	0			18
1	1978-07-13	220	150	161	57	50	2310.96	50	2	18	6980.97		127.77	5.85244	1978-06-25	2183.19	0	0	0	0	50			18
1	1978-07-17	255	160	161	57	51	2354.35	60	2	22	7111.94		171.167	7.84024	1978-06-25	2183.19	0	0	0	0	60			18
1	1978-07-21	265	160	161	57	51	2354.35	100	2	26	7111.94		171.167	7.84024	1978-06-25	2183.19	0	0	50	0	50			18
1	1978-07-24	270	170	161	57	51	2354.35	100	3	29	7111.94		171.167	7.84024	1978-06-25	2183.19	0	0	50	0	50			18
1	1978-06-25	190	140	162	51	50	2059.05	0	1	0	6220.72		0	0	1978-06-25	2059.05	0	0	0	0	0			18
1	1978-06-30	210	170	162	52	50	2100.02	0	2	5	6344.38		40.9751	1.99	1978-06-25	2059.05	0	0	0	0	0			19
1	1978-07-04	230	225	162	52	51	2141.4	0	2	9	6469.26		82.3539	3.99961	1978-06-25	2059.05	0	0	0	0	0			19
1	1978-07-09	200	180	162	52	51	2141.4	0	2	14	6469.26		82.3539	3.99961	1978-06-25	2059.05	0	0	0	0	0			19
1	1978-07-13	220	150	162	53	51	2183.19	0	2	18	6595.36		124.136	6.02882	1978-06-25	2059.05	0	0	0	0	0			19
1	1978-07-17	255	160	162	53	51	2183.19	0	2	22	6595.36		124.136	6.02882	1978-06-25	2059.05	0	0	0	0	0			19
1	1978-07-21	265	160	162	53	52	2225.37	100	2	26	6722.68		166.323	8.07764	1978-06-25	2059.05	0	0	0	0	100			19
1	1978-07-24	270	170	162	53	52	2225.37	100	3	29	6722.68		166.323	8.07764	1978-06-25	2059.05	0	0	0	0	100			19
1	1978-06-25	190	140	163	59	52	2486.97	0	1	0	7512.17		0	0	1978-06-25	2486.97	0	0	0	0	0			19
1	1978-06-30	210	170	163	64	54	2810.53	0	2	5	8488.68		323.562	13.0103	1978-06-25	2486.97	0	0	0	0	0			19
1	1978-07-04	230	225	163	64	54	2810.53	0	2	9	8488.68		323.562	13.0103	1978-06-25	2486.97	0	0	0	0	0			19
1	1978-07-09	200	180	163	64	54	2810.53	0	2	14	8488.68		323.562	13.0103	1978-06-25	2486.97	0	0	0	0	0			19
1	1978-07-13	220	150	163	64	54	2810.53	0	2	18	8488.68		323.562	13.0103	1978-06-25	2486.97	0	0	0	0	0			19
1	1978-07-17	255	160	163	64	55	2858.37	0	2	22	8633.06		371.4	14.9339	1978-06-25	2486.97	0	0	0	0	0			19
1	1978-07-21	265	160	163	64	55	2858.37	0	2	26	8633.06		371.4	14.9339	1978-06-25	2486.97	0	0	0	0	0			19
1	1978-07-24	270	170	163	65	55	2906.61	55	2	29	8778.65		419.642	16.8736	1978-06-25	2486.97	0	5	0	0	50			19
1	1978-07-27	260	185	163	65	55	2906.61	55	3	32	8778.65		419.642	16.8736	1978-06-25	2486.97	0	5	0	0	50			19
1	1978-06-25	190	140	164	65	55	2906.61	0	1	0	8778.65		0	0	1978-06-25	2906.61	0	0	0	0	0			19
1	1978-06-30	210	170	164	68	57	3153.87	0	2	5	9524.89		247.264	8.50694	1978-06-25	2906.61	0	0	0	0	0			19
1	1978-07-04	230	225	164	68	57	3153.87	0	2	9	9524.89		247.264	8.50694	1978-06-25	2906.61	0	0	0	0	0			19
1	1978-07-09	200	180	164	69	57	3204.54	0	2	14	9677.79		297.927	10.25	1978-06-25	2906.61	0	0	0	0	0			19
1	1978-07-13	220	150	164	69	57	3204.54	0	2	18	9677.79		297.927	10.25	1978-06-25	2906.61	0	0	0	0	0			19
1	1978-07-17	255	160	164	69	58	3255.6	0	2	22	9831.92		348.995	12.0069	1978-06-25	2906.61	0	0	0	0	0			19
1	1978-07-21	265	160	164	69	58	3255.6	5	2	26	9831.92		348.995	12.0069	1978-06-25	2906.61	0	0	0	0	5			19
1	1978-07-24	270	170	164	69	58	3255.6	100	2	29	9831.92		348.995	12.0069	1978-06-25	2906.61	0	0	0	0	100			19
1	1978-07-27	260	185	164	69	58	3255.6	100	3	32	9831.92		348.995	12.0069	1978-06-25	2906.61	0	0	0	0	100			19
1	1978-06-25	190	140	165	74	73	4361.73	0	1	0	13170.2		0	0	1978-06-25	4361.73	0	0	0	0	0			19
1	1978-06-30	210	170	165	74	73	4361.73	0	2	5	13170.2		0	0	1978-06-25	4361.73	0	0	0	0	0			19
1	1978-07-04	230	225	165	74	73	4361.73	0	2	9	13170.2		0	0	1978-06-25	4361.73	0	0	0	0	0			19
1	1978-07-09	200	180	165	75	73	4421.27	0	2	14	13349.9		59.5451	1.36517	1978-06-25	4361.73	0	0	0	0	0			19
1	1978-07-13	220	150	165	75	73	4421.27	0	2	18	13349.9		59.5451	1.36517	1978-06-25	4361.73	0	0	0	0	0			19
1	1978-07-17	255	160	165	76	74	4541.58	20	2	22	13713		179.846	4.12328	1978-06-25	4361.73	0	0	0	0	20			19
1	1978-07-21	265	160	165	76	74	4541.58	100	2	26	13713		179.846	4.12328	1978-06-25	4361.73	0	0	0	0	100			19
1	1978-07-24	270	170	165	76	74	4541.58	100	2	29	13713		179.846	4.12328	1978-06-25	4361.73	0	0	25	0	75			19
1	1978-07-27	260	185	165	76	74	4541.58	100	3	32	13713		179.846	4.12328	1978-06-25	4361.73	0	0	25	0	75			19
1	1978-06-25	190	140	166	84	72	4912.17	0	1	0	14831.4		0	0	1978-06-25	4912.17	0	0	0	0	0			19
1	1978-06-30	210	170	166	84	72	4912.17	0	2	5	14831.4		0	0	1978-06-25	4912.17	0	0	0	0	0			19
1	1978-07-04	230	225	166	84	73	4975.35	0	2	9	15022.1		63.1784	1.28616	1978-06-25	4912.17	0	0	0	0	0			19
1	1978-07-09	200	180	166	84	73	4975.35	10	2	14	15022.1		63.1784	1.28616	1978-06-25	4912.17	0	0	0	0	10			19
1	1978-07-13	220	150	166	84	73	4975.35	70	2	18	15022.1		63.1784	1.28616	1978-06-25	4912.17	0	0	0	0	70			19
1	1978-07-17	255	160	166	84	73	4975.35	100	2	22	15022.1		63.1784	1.28616	1978-06-25	4912.17	0	0	60	0	40			19
1	1978-07-21	265	160	166	84	73	4975.35	100	3	26	15022.1		63.1784	1.28616	1978-06-25	4912.17	0	0	60	0	40			19
1	1978-06-25	190	140	167	53	44	1899.19	0	1	0	5738.25		0	0	1978-06-25	1899.19	0	0	0	0	0			19
1	1978-06-30	210	170	167	56	46	2100.02	0	2	5	6344.38		200.839	10.575	1978-06-25	1899.19	0	0	0	0	0			19
1	1978-07-04	230	225	167	56	47	2141.4	0	2	9	6469.26		242.217	12.7537	1978-06-25	1899.19	0	0	0	0	0			19
1	1978-07-09	200	180	167	56	47	2141.4	0	2	14	6469.26		242.217	12.7537	1978-06-25	1899.19	0	0	0	0	0			19
1	1978-07-13	220	150	167	57	47	2183.19	0	2	18	6595.36		284	14.9538	1978-06-25	1899.19	0	0	0	0	0			19
1	1978-07-17	255	160	167	57	47	2183.19	0	2	22	6595.36		284	14.9538	1978-06-25	1899.19	0	0	0	0	0			19
1	1978-07-21	265	160	167	57	47	2183.19	3	2	26	6595.36		284	14.9538	1978-06-25	1899.19	3	0	0	0	0			19
1	1978-07-24	270	170	167	60	48	2354.35	63	2	29	7111.94		455.167	23.9664	1978-06-25	1899.19	3	0	0	0	60			19
1	1978-07-27	260	185	167	60	48	2354.35	100	2	32	7111.94		455.167	23.9664	1978-06-25	1899.19	3	0	40	0	57			19
1	1978-08-01	300	190	167	60	48	2354.35	100	3	37	7111.94		455.167	23.9664	1978-06-25	1899.19	3	0	40	0	57			19
1	1978-06-25	190	140	168	57	53	2442.36	0	1	0	7377.54		0	0	1978-06-25	2442.36	0	0	0	0	0			19
1	1978-06-30	210	170	168	57	53	2442.36	0	2	5	7377.54		0	0	1978-06-25	2442.36	0	0	0	0	0			19
1	1978-07-04	230	225	168	57	53	2442.36	0	2	9	7377.54		0	0	1978-06-25	2442.36	0	0	0	0	0			19
1	1978-07-09	200	180	168	57	53	2442.36	0	2	14	7377.54		0	0	1978-06-25	2442.36	0	0	0	0	0			19
1	1978-07-13	220	150	168	58	54	2531.98	0	2	18	7648.02		89.6204	3.66942	1978-06-25	2442.36	0	0	0	0	0			19
1	1978-07-17	255	160	168	58	54	2531.98	0	2	22	7648.02		89.6204	3.66942	1978-06-25	2442.36	0	0	0	0	0			19
1	1978-07-21	265	160	168	58	54	2531.98	100	2	26	7648.02		89.6204	3.66942	1978-06-25	2442.36	0	0	0	0	100			19
1	1978-07-24	270	170	168	58	54	2531.98	100	3	29	7648.02		89.6204	3.66942	1978-06-25	2442.36	0	0	0	0	100			19
1	1978-06-30	210	170	169	53	47	2018.48	0	1	0	6098.27		0	0	1978-06-30	2018.48	0	0	0	0	0			19
1	1978-07-04	230	225	169	53	47	2018.48	0	3	4	6098.27		0	0	1978-06-30	2018.48	0	0	0	0	0			19
1	1978-06-30	210	170	170	59	51	2442.36	0	1	0	7377.54		0	0	1978-06-30	2442.36	0	0	0	0	0			20
1	1978-07-04	230	225	170	59	53	2531.98	100	2	4	7648.02		89.6204	3.66942	1978-06-30	2442.36	0	0	0	0	100			20
1	1978-07-09	200	180	170	59	53	2531.98	100	2	9	7648.02		89.6204	3.66942	1978-06-30	2442.36	0	0	15	0	85			20
1	1978-07-13	220	150	170	59	53	2531.98	100	2	13	7648.02		89.6204	3.66942	1978-06-30	2442.36	0	0	70	0	30			20
1	1978-07-17	255	160	170	59	53	2531.98	100	3	17	7648.02		89.6204	3.66942	1978-06-30	2442.36	0	0	70	0	30			20
1	1978-06-30	210	170	171	76	57	3570.49	0	1	0	10782.2		0	0	1978-06-30	3570.49	0	0	0	0	0			20
1	1978-07-04	230	225	171	76	57	3570.49	0	2	4	10782.2		0	0	1978-06-30	3570.49	0	0	0	0	0			20
1	1978-07-09	200	180	171	76	57	3570.49	0	2	9	10782.2		0	0	1978-06-30	3570.49	0	0	0	0	0			20
1	1978-07-13	220	150	171	76	68	4185.52	5	2	13	12638.4		615.03	17.2254	1978-06-30	3570.49	0	0	0	0	5			20
1	1978-07-17	255	160	171	76	68	4185.52	10	2	17	12638.4		615.03	17.2254	1978-06-30	3570.49	0	0	0	0	10			20
1	1978-07-21	265	160	171	76	68	4185.52	100	2	21	12638.4		615.03	17.2254	1978-06-30	3570.49	0	0	0	0	100			20
1	1978-07-24	270	170	171	76	68	4185.52	100	2	24	12638.4		615.03	17.2254	1978-06-30	3570.49	0	0	30	0	70			20
1	1978-07-27	260	185	171	76	68	4185.52	100	3	27	12638.4		615.03	17.2254	1978-06-30	3570.49	0	0	30	0	70			20
1	1978-06-30	210	170	172	38	37	1135.39	0	1	0	3433.12		0	0	1978-06-30	1135.39	0	0	0	0	0			20
1	1978-07-04	230	225	172	39	37	1165.87	0	2	4	3525.11		30.479	2.68444	1978-06-30	1135.39	0	0	0	0	0			20
1	1978-07-09	200	180	172	39	37	1165.87	100	2	9	3525.11		30.479	2.68444	1978-06-30	1135.39	0	0	0	0	100			20
1	1978-07-13	220	150	172	39	37	1165.87	100	3	13	3525.11		30.479	2.68444	1978-06-30	1135.39	0	0	0	0	100			20
1	1978-06-30	210	170	173	72	63	3678.68	0	1	0	11108.8		0	0	1978-06-30	3678.68	0	0	0	0	0			20
1	1978-07-04	230	225	173	72	63	3678.68	0	2	4	11108.8		0	0	1978-06-30	3678.68	0	0	0	0	0			20
1	1978-07-09	200	180	173	72	63	3678.68	0	2	9	11108.8		0	0	1978-06-30	3678.68	0	0	0	0	0			20
1	1978-07-13	220	150	173	72	63	3678.68	30	2	13	11108.8		0	0	1978-06-30	3678.68	0	0	0	0	30			20
1	1978-07-17	255	160	173	73	63	3733.38	50	2	17	11273.8		54.7008	1.48697	1978-06-30	3678.68	0	0	30	0	20			20
1	1978-07-21	265	160	173	73	63	3733.38	50	3	21	11273.8		54.7008	1.48697	1978-06-30	3678.68	0	0	30	0	20			20
1	1978-06-30	210	170	174	66	60	3204.54	0	1	0	9677.79		0	0	1978-06-30	3204.54	0	0	0	0	0			20
1	1978-07-04	230	225	174	69	62	3463.91	0	2	4	10460.6		259.374	8.09398	1978-06-30	3204.54	0	0	0	0	0			20
1	1978-07-09	200	180	174	69	62	3463.91	0	2	9	10460.6		259.374	8.09398	1978-06-30	3204.54	0	0	0	0	0			20
1	1978-07-13	220	150	174	69	62	3463.91	0	2	13	10460.6		259.374	8.09398	1978-06-30	3204.54	0	0	0	0	0			20
1	1978-07-17	255	160	174	70	62	3517	0	2	17	10620.8		312.46	9.75057	1978-06-30	3204.54	0	0	0	0	0			20
1	1978-07-21	265	160	174	70	62	3517	0	2	21	10620.8		312.46	9.75057	1978-06-30	3204.54	0	0	0	0	0			20
1	1978-07-24	270	170	174	70	62	3517	100	2	24	10620.8		312.46	9.75057	1978-06-30	3204.54	0	0	0	0	100			20
1	1978-07-27	260	185	174	70	62	3517	100	2	27	10620.8		312.46	9.75057	1978-06-30	3204.54	0	0	20	0	80			20
1	1978-08-01	300	190	174	70	62	3517	100	2	32	10620.8		312.46	9.75057	1978-06-30	3204.54	0	15	60	0	25			20
1	1978-08-03	260	195	174	70	62	3517	100	3	34	10620.8		312.46	9.75057	1978-06-30	3204.54	0	15	60	0	25			20
1	1978-06-30	210	170	175	70	62	3517	0	1	0	10620.8		0	0	1978-06-30	3517	0	0	0	0	0			20
1	1978-07-04	230	225	175	70	62	3517	10	2	4	10620.8		0	0	1978-06-30	3517	0	0	0	0	10			20
1	1978-07-09	200	180	175	70	62	3517	15	2	9	10620.8		0	0	1978-06-30	3517	0	0	0	0	15			20
1	1978-07-13	220	150	175	70	62	3517	30	2	13	10620.8		0	0	1978-06-30	3517	0	0	0	0	30			20
1	1978-07-17	255	160	175	70	62	3517	100	2	17	10620.8		0	0	1978-06-30	3517	0	0	0	0	100			20
1	1978-07-21	265	160	175	70	62	3517	100	3	21	10620.8		0	0	1978-06-30	3517	0	0	0	0	100			20
1	1978-06-30	210	170	176	59	59	2810.53	0	1	0	8488.68		0	0	1978-06-30	2810.53	0	0	0	0	0			20
1	1978-07-04	230	225	176	59	59	2810.53	0	2	4	8488.68		0	0	1978-06-30	2810.53	0	0	0	0	0			20
1	1978-07-09	200	180	176	59	59	2810.53	10	2	9	8488.68		0	0	1978-06-30	2810.53	0	0	0	0	10			20
1	1978-07-13	220	150	176	59	59	2810.53	30	2	13	8488.68		0	0	1978-06-30	2810.53	0	0	0	0	30			20
1	1978-07-17	255	160	176	59	59	2810.53	80	2	17	8488.68		0	0	1978-06-30	2810.53	0	0	40	0	40			20
1	1978-07-21	265	160	176	59	59	2810.53	80	3	21	8488.68		0	0	1978-06-30	2810.53	0	0	40	0	40			20
1	1978-06-30	210	170	177	55	50	2225.37	0	1	0	6722.68		0	0	1978-06-30	2225.37	0	0	0	0	0			20
1	1978-07-04	230	225	177	55	50	2225.37	0	2	4	6722.68		0	0	1978-06-30	2225.37	0	0	0	0	0			20
1	1978-07-09	200	180	177	55	51	2267.96	60	2	9	6851.21		42.5899	1.91383	1978-06-30	2225.37	0	0	0	0	60			20
1	1978-07-13	220	150	177	56	52	2354.35	100	2	13	7111.94		128.981	5.79592	1978-06-30	2225.37	0	0	0	0	100			20
1	1978-07-17	255	160	177	56	52	2354.35	100	3	17	7111.94		128.981	5.79592	1978-06-30	2225.37	0	0	0	0	100			20
1	1978-06-30	210	170	178	78	66	4185.52	0	1	0	12638.4		0	0	1978-06-30	4185.52	0	0	0	0	0			20
1	1978-07-04	230	225	178	79	68	4361.73	0	2	4	13170.2		176.213	4.21007	1978-06-30	4185.52	0	0	0	0	0			20
1	1978-07-09	200	180	178	79	68	4361.73	20	2	9	13170.2		176.213	4.21007	1978-06-30	4185.52	0	0	0	0	20			20
1	1978-07-13	220	150	178	80	68	4421.27	100	2	13	13349.9		235.758	5.63272	1978-06-30	4185.52	0	0	0	0	100			20
1	1978-07-17	255	160	178	80	68	4421.27	100	2	17	13349.9		235.758	5.63272	1978-06-30	4185.52	0	0	0	0	100			20
1	1978-07-21	265	160	178	80	68	4421.27	100	2	21	13349.9		235.758	5.63272	1978-06-30	4185.52	0	0	30	1	69			20
1	1978-07-24	270	170	178	80	68	4421.27	100	3	24	13349.9		235.758	5.63272	1978-06-30	4185.52	0	0	30	1	69			20
1	1978-06-30	210	170	179	61	54	2669.44	0	1	0	8062.87		0	0	1978-06-30	2669.44	0	0	0	0	0			20
1	1978-07-04	230	225	179	61	55	2716.06	0	2	4	8203.59		46.6268	1.74669	1978-06-30	2669.44	0	0	0	0	0			20
1	1978-07-09	200	180	179	61	55	2716.06	0	2	9	8203.59		46.6268	1.74669	1978-06-30	2669.44	0	0	0	0	0			20
1	1978-07-13	220	150	179	61	55	2716.06	0	2	13	8203.59		46.6268	1.74669	1978-06-30	2669.44	0	0	0	0	0			20
1	1978-07-17	255	160	179	61	55	2716.06	10	2	17	8203.59		46.6268	1.74669	1978-06-30	2669.44	0	0	0	0	10			21
1	1978-07-21	265	160	179	61	55	2716.06	50	2	21	8203.59		46.6268	1.74669	1978-06-30	2669.44	0	0	0	0	50			21
1	1978-07-24	270	170	179	61	55	2716.06	100	2	24	8203.59		46.6268	1.74669	1978-06-30	2669.44	0	0	25	0	75			21
1	1978-07-27	260	185	179	61	55	2716.06	100	3	27	8203.59		46.6268	1.74669	1978-06-30	2669.44	0	0	25	0	75			21
1	1978-06-30	210	170	180	71	58	3358.95	0	1	0	10143.8		0	0	1978-06-30	3358.95	0	0	0	0	0			21
1	1978-07-04	230	225	180	71	59	3411.23	0	2	4	10301.6		52.2786	1.5564	1978-06-30	3358.95	0	0	0	0	0			21
1	1978-07-09	200	180	180	71	59	3411.23	5	2	9	10301.6		52.2786	1.5564	1978-06-30	3358.95	0	0	0	0	5			21
1	1978-07-13	220	150	180	71	59	3411.23	5	2	13	10301.6		52.2786	1.5564	1978-06-30	3358.95	0	0	0	0	5			21
1	1978-07-17	255	160	180	71	59	3411.23	30	2	17	10301.6		52.2786	1.5564	1978-06-30	3358.95	0	0	5	0	25			21
1	1978-07-21	265	160	180	71	60	3463.91	70	2	21	10460.6		104.961	3.12481	1978-06-30	3358.95	0	0	10	0	60			21
1	1978-07-24	270	170	180	71	60	3463.91	100	2	24	10460.6		104.961	3.12481	1978-06-30	3358.95	0	0	50	0	50			21
1	1978-07-27	260	185	180	71	60	3463.91	100	3	27	10460.6		104.961	3.12481	1978-06-30	3358.95	0	0	50	0	50			21
1	1978-06-30	210	170	181	56	53	2398.15	0	1	0	7244.13		0	0	1978-06-30	2398.15	0	0	0	0	0			21
1	1978-07-04	230	225	181	57	53	2442.36	0	2	4	7377.54		44.2047	1.84328	1978-06-30	2398.15	0	0	0	0	0			21
1	1978-07-09	200	180	181	57	53	2442.36	40	2	9	7377.54		44.2047	1.84328	1978-06-30	2398.15	0	0	0	0	40			21
1	1978-07-13	220	150	181	57	53	2442.36	40	2	13	7377.54		44.2047	1.84328	1978-06-30	2398.15	0	0	0	0	40			21
1	1978-07-17	255	160	181	57	53	2442.36	40	2	17	7377.54		44.2047	1.84328	1978-06-30	2398.15	0	0	20	0	20			21
1	1978-07-21	265	160	181	57	53	2442.36	40	3	21	7377.54		44.2047	1.84328	1978-06-30	2398.15	0	0	20	0	20			21
1	1978-06-30	210	170	182	52	47	1978.31	0	1	0	5977.05		0	0	1978-06-30	1978.31	0	0	0	0	0			21
1	1978-07-04	230	225	182	52	47	1978.31	0	2	4	5977.05		0	0	1978-06-30	1978.31	0	0	0	0	0			21
1	1978-07-09	200	180	182	52	47	1978.31	0	2	9	5977.05		0	0	1978-06-30	1978.31	0	0	0	0	0			21
1	1978-07-13	220	150	182	53	47	2018.48	100	2	13	6098.27		40.1677	2.03041	1978-06-30	1978.31	0	0	0	0	100			21
1	1978-07-17	255	160	182	53	47	2018.48	100	2	17	6098.27		40.1677	2.03041	1978-06-30	1978.31	0	0	0	0	100			21
1	1978-07-21	265	160	182	53	47	2018.48	100	3	21	6098.27		40.1677	2.03041	1978-06-30	1978.31	0	0	0	0	100			21
1	1978-06-30	210	170	183	52	48	2018.48	0	1	0	6098.27		0	0	1978-06-30	2018.48	0	0	0	0	0			21
1	1978-07-04	230	225	183	53	48	2059.05	0	2	4	6220.72		40.5714	2.01	1978-06-30	2018.48	0	0	0	0	0			21
1	1978-07-09	200	180	183	53	48	2059.05	0	2	9	6220.72		40.5714	2.01	1978-06-30	2018.48	0	0	0	0	0			21
1	1978-07-13	220	150	183	53	50	2141.4	0	2	13	6469.26		122.925	6.09	1978-06-30	2018.48	0	0	0	0	0			21
1	1978-07-17	255	160	183	53	50	2141.4	0	2	17	6469.26		122.925	6.09	1978-06-30	2018.48	0	0	0	0	0			21
1	1978-07-21	265	160	183	54	51	2225.37	0	2	21	6722.68		206.894	10.25	1978-06-30	2018.48	0	0	0	0	0			21
1	1978-07-24	270	170	183	55	51	2267.96	30	2	24	6851.21		249.484	12.36	1978-06-30	2018.48	0	0	0	0	30			21
1	1978-07-27	260	185	183	55	51	2267.96	30	2	27	6851.21		249.484	12.36	1978-06-30	2018.48	0	0	10	0	20			21
1	1978-08-01	300	190	183	55	51	2267.96	30	3	32	6851.21		249.484	12.36	1978-06-30	2018.48	0	0	10	0	20			21
1	1978-06-30	210	170	184	61	54	2669.44	100	1	0	8062.87		0	0	1978-06-30	2669.44	0	0	0	0	100			21
1	1978-07-04	230	225	184	61	54	2669.44	100	3	4	8062.87		0	0	1978-06-30	2669.44	0	0	0	0	100			21
1	1978-07-04	230	225	185	63	55	2810.53	0	1	0	8488.68		0	0	1978-07-04	2810.53	0	0	0	0	0			21
1	1978-07-09	200	180	185	65	57	3004.3	0	2	5	9073.49		193.774	6.89457	1978-07-04	2810.53	0	0	0	0	0			21
1	1978-07-13	220	150	185	65	58	3053.76	0	2	9	9222.74		243.227	8.65412	1978-07-04	2810.53	0	0	0	0	0			21
1	1978-07-17	255	160	185	65	58	3053.76	0	2	13	9222.74		243.227	8.65412	1978-07-04	2810.53	0	0	0	0	0			21
1	1978-07-21	265	160	185	65	58	3053.76	0	2	17	9222.74		243.227	8.65412	1978-07-04	2810.53	0	0	0	0	0			21
1	1978-07-24	270	170	185	67	60	3255.6	11	2	20	9831.92		445.074	15.836	1978-07-04	2810.53	0	0	0	1	10			21
1	1978-07-27	260	185	185	67	61	3307.07	16	2	23	9987.26		496.546	17.6673	1978-07-04	2810.53	1	0	0	5	10			21
1	1978-08-01	300	190	185	67	61	3307.07	26	2	28	9987.26		496.546	17.6673	1978-07-04	2810.53	1	0	5	15	5			21
1	1978-08-03	260	195	185	67	61	3307.07	100	2	30	9987.26		496.546	17.6673	1978-07-04	2810.53	1	0	5	20	74			21
1	1978-08-09	210	170	185	67	61	3307.07	100	3	36	9987.26		496.546	17.6673	1978-07-04	2810.53	1	0	5	20	74			21
1	1978-07-04	230	225	186	61	52	2577.39	0	1	0	7785.08		0	0	1978-07-04	2577.39	0	0	0	0	0			21
1	1978-07-09	200	180	186	64	55	2858.37	0	2	5	8633.06		280.972	10.9014	1978-07-04	2577.39	0	0	0	0	0			21
1	1978-07-13	220	150	186	64	56	2906.61	0	2	9	8778.65		329.214	12.7731	1978-07-04	2577.39	0	0	0	0	0			21
1	1978-07-17	255	160	186	64	56	2906.61	0	2	13	8778.65		329.214	12.7731	1978-07-04	2577.39	0	0	0	0	0			21
1	1978-07-21	265	160	186	64	56	2906.61	0	2	17	8778.65		329.214	12.7731	1978-07-04	2577.39	0	0	0	0	0			21
1	1978-07-24	270	170	186	64	56	2906.61	0	2	20	8778.65		329.214	12.7731	1978-07-04	2577.39	0	0	0	0	0			21
1	1978-07-27	260	185	186	64	56	2906.61	0	3	23	8778.65		329.214	12.7731	1978-07-04	2577.39	0	0	0	0	0			21
1	1978-07-04	230	225	187	65	56	2955.25	0	1	0	8925.46		0	0	1978-07-04	2955.25	0	0	0	0	0			21
1	1978-07-09	200	180	187	66	56	3004.3	0	2	5	9073.49		49.049	1.65972	1978-07-04	2955.25	0	0	0	0	0			21
1	1978-07-13	220	150	187	66	56	3004.3	0	2	9	9073.49		49.049	1.65972	1978-07-04	2955.25	0	0	0	0	0			21
1	1978-07-17	255	160	187	66	56	3004.3	0	2	13	9073.49		49.049	1.65972	1978-07-04	2955.25	0	0	0	0	0			21
1	1978-07-21	265	160	187	66	57	3053.76	0	2	17	9222.74		98.5017	3.33311	1978-07-04	2955.25	0	0	0	0	0			21
1	1978-07-24	270	170	187	67	57	3103.61	20	2	20	9373.21		148.358	5.02015	1978-07-04	2955.25	0	0	0	0	20			21
1	1978-07-27	260	185	187	67	57	3103.61	55	2	23	9373.21		148.358	5.02015	1978-07-04	2955.25	0	0	15	0	40			21
1	1978-08-01	300	190	187	67	57	3103.61	60	2	28	9373.21		148.358	5.02015	1978-07-04	2955.25	0	10	10	0	40			21
1	1978-08-03	260	195	187	67	57	3103.61	95	2	30	9373.21		148.358	5.02015	1978-07-04	2955.25	0	15	40	0	40			21
1	1978-08-09	210	170	187	67	57	3103.61	95	3	36	9373.21		148.358	5.02015	1978-07-04	2955.25	0	15	40	0	40			22
1	1978-07-04	230	225	188	60	53	2577.39	0	1	0	7785.08		0	0	1978-07-04	2577.39	0	0	0	0	0			22
1	1978-07-09	200	180	188	63	54	2763.09	0	2	5	8345.53		185.7	7.20495	1978-07-04	2577.39	0	0	0	0	0			22
1	1978-07-13	220	150	188	63	54	2763.09	0	2	9	8345.53		185.7	7.20495	1978-07-04	2577.39	0	0	0	0	0			22
1	1978-07-17	255	160	188	63	54	2763.09	20	2	13	8345.53		185.7	7.20495	1978-07-04	2577.39	0	0	0	0	20			22
1	1978-07-21	265	160	188	63	55	2810.53	100	2	17	8488.68		233.134	9.04534	1978-07-04	2577.39	0	0	0	0	100			22
1	1978-07-24	270	170	188	63	55	2810.53	100	2	20	8488.68		233.134	9.04534	1978-07-04	2577.39	0	0	70	0	30			22
1	1978-07-27	260	185	188	63	55	2810.53	100	3	23	8488.68		233.134	9.04534	1978-07-04	2577.39	0	0	70	0	30			22
1	1978-07-04	230	225	189	65	58	3053.76	0	1	0	9222.74		0	0	1978-07-04	3053.76	0	0	0	0	0			22
1	1978-07-09	200	180	189	65	58	3053.76	0	2	5	9222.74		0	0	1978-07-04	3053.76	0	0	0	0	0			22
1	1978-07-13	220	150	189	65	58	3053.76	0	2	9	9222.74		0	0	1978-07-04	3053.76	0	0	0	0	0			22
1	1978-07-17	255	160	189	65	58	3053.76	0	2	13	9222.74		0	0	1978-07-04	3053.76	0	0	0	0	0			22
1	1978-07-21	265	160	189	65	59	3103.61	0	2	17	9373.21		49.8564	1.63263	1978-07-04	3053.76	0	0	0	0	0			22
1	1978-07-24	270	170	189	65	61	3204.54	1	2	20	9677.79		150.78	4.93754	1978-07-04	3053.76	1	0	0	0	0			22
1	1978-07-27	260	185	189	65	61	3204.54	11	2	23	9677.79		150.78	4.93754	1978-07-04	3053.76	1	0	0	0	10			22
1	1978-08-01	300	190	189	66	61	3255.6	100	2	28	9831.92		201.848	6.60982	1978-07-04	3053.76	1	0	5	0	94			22
1	1978-08-03	260	195	189	66	61	3255.6	100	2	30	9831.92		201.848	6.60982	1978-07-04	3053.76	1	0	30	0	69			22
1	1978-08-09	210	170	189	66	61	3255.6	100	3	36	9831.92		201.848	6.60982	1978-07-04	3053.76	1	0	30	0	69			22
1	1978-07-04	230	225	190	65	55	2906.61	0	1	0	8778.65		0	0	1978-07-04	2906.61	0	0	0	0	0			22
1	1978-07-09	200	180	190	67	58	3153.87	0	2	5	9524.89		247.264	8.50694	1978-07-04	2906.61	0	0	0	0	0			22
1	1978-07-13	220	150	190	68	58	3204.54	0	2	9	9677.79		297.927	10.25	1978-07-04	2906.61	0	0	0	0	0			22
1	1978-07-17	255	160	190	68	58	3204.54	0	2	13	9677.79		297.927	10.25	1978-07-04	2906.61	0	0	0	0	0			22
1	1978-07-21	265	160	190	69	59	3307.07	0	2	17	9987.26		400.466	13.7778	1978-07-04	2906.61	0	0	0	0	0			22
1	1978-07-24	270	170	190	70	60	3411.23	5	2	20	10301.6		504.619	17.3611	1978-07-04	2906.61	0	0	0	0	5			22
1	1978-07-27	260	185	190	70	60	3411.23	5	2	23	10301.6		504.619	17.3611	1978-07-04	2906.61	0	0	0	0	5			22
1	1978-08-01	300	190	190	70	60	3411.23	10	2	28	10301.6		504.619	17.3611	1978-07-04	2906.61	0	0	0	0	10			22
1	1978-08-03	260	195	190	71	60	3463.91	10	2	30	10460.6		557.302	19.1736	1978-07-04	2906.61	0	0	0	0	10			22
1	1978-08-09	210	170	190	71	60	3463.91	100	2	36	10460.6		557.302	19.1736	1978-07-04	2906.61	0	0	60	5	35			22
1	1978-08-13	190	165	190	71	60	3463.91	100	3	40	10460.6		557.302	19.1736	1978-07-04	2906.61	0	0	60	5	35			22
1	1978-07-04	230	225	191	66	57	3053.76	0	1	0	9222.74		0	0	1978-07-04	3053.76	0	0	0	0	0			22
1	1978-07-09	200	180	191	66	57	3053.76	0	2	5	9222.74		0	0	1978-07-04	3053.76	0	0	0	0	0			22
1	1978-07-13	220	150	191	67	57	3103.61	0	2	9	9373.21		49.8564	1.63263	1978-07-04	3053.76	0	0	0	0	0			22
1	1978-07-17	255	160	191	67	57	3103.61	0	2	13	9373.21		49.8564	1.63263	1978-07-04	3053.76	0	0	0	0	0			22
1	1978-07-21	265	160	191	67	58	3153.87	0	2	17	9524.89		100.117	3.27847	1978-07-04	3053.76	0	0	0	0	0			22
1	1978-07-24	270	170	191	67	58	3153.87	5	2	20	9524.89		100.117	3.27847	1978-07-04	3053.76	0	0	0	0	5			22
1	1978-07-27	260	185	191	67	58	3153.87	60	2	23	9524.89		100.117	3.27847	1978-07-04	3053.76	0	0	20	0	40			22
1	1978-08-01	300	190	191	67	58	3153.87	70	2	28	9524.89		100.117	3.27847	1978-07-04	3053.76	0	20	30	0	20			22
1	1978-08-03	260	195	191	67	58	3153.87	70	3	30	9524.89		100.117	3.27847	1978-07-04	3053.76	0	20	30	0	20			22
1	1978-07-04	230	225	192	73	61	3624.38	0	1	0	10944.9		0	0	1978-07-04	3624.38	0	0	0	0	0			22
1	1978-07-09	200	180	192	76	65	4012.94	0	2	5	12117.5		388.557	10.7207	1978-07-04	3624.38	0	0	0	0	0			22
1	1978-07-13	220	150	192	77	67	4185.52	0	2	9	12638.4		561.137	15.4823	1978-07-04	3624.38	0	0	0	0	0			22
1	1978-07-17	255	160	192	77	67	4185.52	0	2	13	12638.4		561.137	15.4823	1978-07-04	3624.38	0	0	0	0	0			22
1	1978-07-21	265	160	192	77	67	4185.52	0	2	17	12638.4		561.137	15.4823	1978-07-04	3624.38	0	0	0	0	0			22
1	1978-07-24	270	170	192	77	67	4185.52	5	2	20	12638.4		561.137	15.4823	1978-07-04	3624.38	0	0	0	0	5			22
1	1978-07-27	260	185	192	77	67	4185.52	15	2	23	12638.4		561.137	15.4823	1978-07-04	3624.38	0	0	5	0	10			22
1	1978-08-01	300	190	192	77	67	4185.52	20	2	28	12638.4		561.137	15.4823	1978-07-04	3624.38	0	5	5	0	10			22
1	1978-08-03	260	195	192	77	67	4185.52	75	2	30	12638.4		561.137	15.4823	1978-07-04	3624.38	0	10	5	0	60			22
1	1978-08-09	210	170	192	77	67	4185.52	75	2	36	12638.4		561.137	15.4823	1978-07-04	3624.38	0	10	30	5	30			22
1	1978-08-13	190	165	192	77	67	4185.52	100	2	40	12638.4		561.137	15.4823	1978-07-04	3624.38	0	10	40	10	40			22
1	1978-08-18	235	180	192	77	67	4185.52	100	3	45	12638.4		561.137	15.4823	1978-07-04	3624.38	0	10	40	10	40			22
1	1978-07-04	230	225	193	79	58	3788.48	0	1	0	11440.1		0	0	1978-07-04	3788.48	0	0	0	0	0			22
1	1978-07-09	200	180	193	80	60	3956.22	0	2	5	11946.4		167.736	4.42751	1978-07-04	3788.48	0	0	0	0	0			22
1	1978-07-13	220	150	193	82	62	4185.52	0	2	9	12638.4		397.035	10.48	1978-07-04	3788.48	0	0	0	0	0			22
1	1978-07-17	255	160	193	82	62	4185.52	0	2	13	12638.4		397.035	10.48	1978-07-04	3788.48	0	0	0	0	0			22
1	1978-07-21	265	160	193	85	63	4421.27	0	2	17	13349.9		632.793	16.7031	1978-07-04	3788.48	0	0	0	0	0			22
1	1978-07-24	270	170	193	85	64	4481.22	0	2	20	13530.8		692.742	18.2855	1978-07-04	3788.48	0	0	0	0	0			22
1	1978-07-27	260	185	193	86	64	4541.58	100	2	23	13713		753.094	19.8785	1978-07-04	3788.48	0	0	0	0	100			22
1	1978-08-01	300	190	193	86	64	4541.58	100	2	28	13713		753.094	19.8785	1978-07-04	3788.48	0	0	0	0	100			22
1	1978-08-03	260	195	193	86	64	4541.58	100	2	30	13713		753.094	19.8785	1978-07-04	3788.48	0	0	60	0	40			22
1	1978-08-09	210	170	193	86	64	4541.58	100	3	36	13713		753.094	19.8785	1978-07-04	3788.48	0	0	60	0	40			22
1	1978-07-09	200	180	194	69	63	3517	0	1	0	10620.8		0	0	1978-07-09	3517	0	0	0	0	0			22
1	1978-07-13	220	150	194	70	64	3624.38	0	2	4	10944.9		107.383	3.05326	1978-07-09	3517	0	0	0	0	0			23
1	1978-07-17	255	160	194	71	64	3678.68	0	2	8	11108.8		161.68	4.59711	1978-07-09	3517	0	0	0	0	0			23
1	1978-07-21	265	160	194	71	64	3678.68	20	2	12	11108.8		161.68	4.59711	1978-07-09	3517	0	0	0	0	20			23
1	1978-07-24	270	170	194	71	64	3678.68	60	2	15	11108.8		161.68	4.59711	1978-07-09	3517	0	0	0	0	60			23
1	1978-07-27	260	185	194	71	64	3678.68	100	2	18	11108.8		161.68	4.59711	1978-07-09	3517	0	0	50	0	50			23
1	1978-08-01	300	190	194	71	64	3678.68	100	3	23	11108.8		161.68	4.59711	1978-07-09	3517	0	0	50	0	50			23
1	1978-07-09	200	180	195	40	37	1196.76	0	1	0	3618.31		0	0	1978-07-09	1196.76	0	0	0	0	0			23
1	1978-07-13	220	150	195	41	38	1259.73	0	2	4	3808.38		62.9765	5.26227	1978-07-09	1196.76	0	0	0	0	0			23
1	1978-07-17	255	160	195	41	38	1259.73	0	2	8	3808.38		62.9765	5.26227	1978-07-09	1196.76	0	0	0	0	0			23
1	1978-07-21	265	160	195	41	38	1259.73	0	2	12	3808.38		62.9765	5.26227	1978-07-09	1196.76	0	0	0	0	0			23
1	1978-07-24	270	170	195	41	40	1324.32	0	2	15	4003.31		127.568	10.6595	1978-07-09	1196.76	0	0	0	0	0			23
1	1978-07-27	260	185	195	41	40	1324.32	0	2	18	4003.31		127.568	10.6595	1978-07-09	1196.76	0	0	0	0	0			23
1	1978-08-01	300	190	195	41	40	1324.32	5	2	23	4003.31		127.568	10.6595	1978-07-09	1196.76	0	0	0	0	5			23
1	1978-08-03	260	195	195	41	40	1324.32	5	2	25	4003.31		127.568	10.6595	1978-07-09	1196.76	0	0	0	0	5			23
1	1978-08-09	210	170	195	42	41	1390.53	45	2	31	4203.12		193.774	16.1916	1978-07-09	1196.76	0	0	0	5	40			23
1	1978-08-13	190	165	195	42	41	1390.53	100	2	35	4203.12		193.774	16.1916	1978-07-09	1196.76	0	0	50	5	45			23
1	1978-08-18	235	180	195	42	41	1390.53	100	3	40	4203.12		193.774	16.1916	1978-07-09	1196.76	0	0	50	5	45			23
1	1978-07-09	200	180	196	62	52	2623.21	0	1	0	7923.37		0	0	1978-07-09	2623.21	0	0	0	0	0			23
1	1978-07-13	220	150	196	64	52	2716.06	0	2	4	8203.59		92.85	3.53955	1978-07-09	2623.21	0	0	0	0	0			23
1	1978-07-17	255	160	196	65	52	2763.09	0	2	8	8345.53		139.881	5.33241	1978-07-09	2623.21	0	0	0	0	0			23
1	1978-07-21	265	160	196	66	52	2810.53	0	2	12	8488.68		187.315	7.14066	1978-07-09	2623.21	0	0	0	0	0			23
1	1978-07-24	270	170	196	66	52	2810.53	30	2	15	8488.68		187.315	7.14066	1978-07-09	2623.21	0	0	0	0	30			23
1	1978-07-27	260	185	196	66	52	2810.53	35	2	18	8488.68		187.315	7.14066	1978-07-09	2623.21	0	0	5	0	30			23
1	1978-08-01	300	190	196	66	52	2810.53	40	2	23	8488.68		187.315	7.14066	1978-07-09	2623.21	0	0	15	0	25			23
1	1978-08-03	260	195	196	66	52	2810.53	100	2	25	8488.68		187.315	7.14066	1978-07-09	2623.21	0	0	60	0	40			23
1	1978-08-09	210	170	196	66	52	2810.53	100	3	31	8488.68		187.315	7.14066	1978-07-09	2623.21	0	0	60	0	40			23
1	1978-07-09	200	180	197	54	46	2018.48	0	1	0	6098.27		0	0	1978-07-09	2018.48	0	0	0	0	0			23
1	1978-07-13	220	150	197	54	47	2059.05	0	2	4	6220.72		40.5714	2.01	1978-07-09	2018.48	0	0	0	0	0			23
1	1978-07-17	255	160	197	54	47	2059.05	0	2	8	6220.72		40.5714	2.01	1978-07-09	2018.48	0	0	0	0	0			23
1	1978-07-21	265	160	197	56	47	2141.4	0	2	12	6469.26		122.925	6.09	1978-07-09	2018.48	0	0	0	0	0			23
1	1978-07-24	270	170	197	58	49	2310.96	31	2	15	6980.97		292.477	14.49	1978-07-09	2018.48	1	0	0	0	30			23
1	1978-07-27	260	185	197	58	49	2310.96	41	2	18	6980.97		292.477	14.49	1978-07-09	2018.48	1	0	0	0	40			23
1	1978-08-01	300	190	197	58	49	2310.96	41	2	23	6980.97		292.477	14.49	1978-07-09	2018.48	1	0	10	0	30			23
1	1978-08-03	260	195	197	58	49	2310.96	71	2	25	6980.97		292.477	14.49	1978-07-09	2018.48	1	10	40	0	20			23
1	1978-08-09	210	170	197	58	49	2310.96	71	3	31	6980.97		292.477	14.49	1978-07-09	2018.48	1	10	40	0	20			23
1	1978-07-09	200	180	198	54	48	2100.02	0	1	0	6344.38		0	0	1978-07-09	2100.02	0	0	0	0	0			23
1	1978-07-13	220	150	198	54	48	2100.02	0	2	4	6344.38		0	0	1978-07-09	2100.02	0	0	0	0	0			23
1	1978-07-17	255	160	198	54	48	2100.02	0	2	8	6344.38		0	0	1978-07-09	2100.02	0	0	0	0	0			23
1	1978-07-21	265	160	198	55	48	2141.4	30	2	12	6469.26		41.3788	1.9704	1978-07-09	2100.02	0	0	0	0	30			23
1	1978-07-24	270	170	198	56	51	2310.96	80	2	15	6980.97		210.931	10.0442	1978-07-09	2100.02	0	0	0	0	80			23
1	1978-07-27	260	185	198	56	51	2310.96	100	2	18	6980.97		210.931	10.0442	1978-07-09	2100.02	0	0	40	0	60			23
1	1978-08-01	300	190	198	56	51	2310.96	100	2	23	6980.97		210.931	10.0442	1978-07-09	2100.02	0	30	50	0	20			23
1	1978-08-03	260	195	198	56	51	2310.96	100	3	25	6980.97		210.931	10.0442	1978-07-09	2100.02	0	30	50	0	20			23
1	1978-07-13	220	150	199	58	51	2398.15	0	1	0	7244.13		0	0	1978-07-13	2398.15	0	0	0	0	0			23
1	1978-07-17	255	160	199	59	52	2486.97	0	2	4	7512.17		88.813	3.70339	1978-07-13	2398.15	0	0	0	0	0			23
1	1978-07-21	265	160	199	59	52	2486.97	0	2	8	7512.17		88.813	3.70339	1978-07-13	2398.15	0	0	0	0	0			23
1	1978-07-24	270	170	199	61	54	2669.44	30	2	11	8062.87		271.283	11.3122	1978-07-13	2398.15	0	0	0	0	30			23
1	1978-07-27	260	185	199	61	54	2669.44	40	2	14	8062.87		271.283	11.3122	1978-07-13	2398.15	0	0	0	0	40			23
1	1978-08-01	300	190	199	61	54	2669.44	51	2	19	8062.87		271.283	11.3122	1978-07-13	2398.15	0	0	20	1	30			23
1	1978-08-03	260	195	199	61	54	2669.44	100	2	21	8062.87		271.283	11.3122	1978-07-13	2398.15	0	0	55	5	40			23
1	1978-08-09	210	170	199	61	54	2669.44	100	3	27	8062.87		271.283	11.3122	1978-07-13	2398.15	0	0	55	5	40			23
1	1978-07-13	220	150	200	53	46	1978.31	0	1	0	5977.05		0	0	1978-07-13	1978.31	0	0	0	0	0			23
1	1978-07-17	255	160	200	55	47	2100.02	0	2	4	6344.38		121.714	6.15243	1978-07-13	1978.31	0	0	0	0	0			23
1	1978-07-21	265	160	200	58	48	2267.96	30	2	8	6851.21		289.652	14.6414	1978-07-13	1978.31	0	0	0	0	30			23
1	1978-07-24	270	170	200	60	51	2486.97	80	2	11	7512.17		508.656	25.7117	1978-07-13	1978.31	0	0	0	0	80			23
1	1978-07-27	260	185	200	60	51	2486.97	100	2	14	7512.17		508.656	25.7117	1978-07-13	1978.31	0	0	60	0	40			23
1	1978-08-01	300	190	200	60	51	2486.97	100	3	19	7512.17		508.656	25.7117	1978-07-13	1978.31	0	0	60	0	40			23
1	1978-07-13	220	150	201	65	50	2669.44	0	1	0	8062.87		0	0	1978-07-13	2669.44	0	0	0	0	0			23
1	1978-07-17	255	160	201	65	51	2716.06	0	2	4	8203.59		46.6268	1.74669	1978-07-13	2669.44	0	0	0	0	0			23
1	1978-07-21	265	160	201	67	54	2955.25	0	2	8	8925.46		285.816	10.707	1978-07-13	2669.44	0	0	0	0	0			23
1	1978-07-24	270	170	201	71	55	3204.54	0	2	11	9677.79		535.099	20.0454	1978-07-13	2669.44	0	0	0	0	0			23
1	1978-07-27	260	185	201	71	55	3204.54	0	2	14	9677.79		535.099	20.0454	1978-07-13	2669.44	0	0	0	0	0			24
1	1978-08-01	300	190	201	71	55	3204.54	1	2	19	9677.79		535.099	20.0454	1978-07-13	2669.44	0	0	0	1	0			24
1	1978-08-03	260	195	201	71	56	3255.6	35	2	21	9831.92		586.166	21.9584	1978-07-13	2669.44	10	0	0	5	20			24
1	1978-08-09	210	170	201	71	56	3255.6	100	2	27	9831.92		586.166	21.9584	1978-07-13	2669.44	10	0	45	15	30			24
1	1978-08-13	190	165	201	71	56	3255.6	100	3	31	9831.92		586.166	21.9584	1978-07-13	2669.44	10	0	45	15	30			24
1	1978-07-13	220	150	202	36	31	906.095	0	1	0	2741.1		0	0	1978-07-13	906.095	0	0	0	0	0			24
1	1978-07-17	255	160	202	36	31	906.095	0	2	4	2741.1		0	0	1978-07-13	906.095	0	0	0	0	0			24
1	1978-07-21	265	160	202	36	31	906.095	0	2	8	2741.1		0	0	1978-07-13	906.095	0	0	0	0	0			24
1	1978-07-24	270	170	202	36	31	906.095	0	2	11	2741.1		0	0	1978-07-13	906.095	0	0	0	0	0			24
1	1978-07-27	260	185	202	36	31	906.095	0	2	14	2741.1		0	0	1978-07-13	906.095	0	0	0	0	0			24
1	1978-08-01	300	190	202	36	31	906.095	10	2	19	2741.1		0	0	1978-07-13	906.095	0	0	0	0	10			24
1	1978-08-03	260	195	202	36	31	906.095	30	2	21	2741.1		0	0	1978-07-13	906.095	0	0	0	0	30			24
1	1978-08-09	210	170	202	36	31	906.095	100	2	27	2741.1		0	0	1978-07-13	906.095	0	0	40	0	60			24
1	1978-08-13	190	165	202	36	31	906.095	100	3	31	2741.1		0	0	1978-07-13	906.095	0	0	40	0	60			24
1	1978-07-13	220	150	203	29	32	751.076	0	1	0	2273.25		0	0	1978-07-13	751.076	0	0	0	0	0			24
1	1978-07-17	255	160	203	29	32	751.076	0	2	4	2273.25		0	0	1978-07-13	751.076	0	0	0	0	0			24
1	1978-07-21	265	160	203	29	32	751.076	20	2	8	2273.25		0	0	1978-07-13	751.076	0	0	0	0	20			24
1	1978-07-24	270	170	203	29	32	751.076	60	2	11	2273.25		0	0	1978-07-13	751.076	0	0	0	0	60			24
1	1978-07-27	260	185	203	39	32	1017.51	85	2	14	3077.37		266.439	35.4743	1978-07-13	751.076	0	5	30	0	50			24
1	1978-08-01	300	190	203	39	32	1017.51	100	2	19	3077.37		266.439	35.4743	1978-07-13	751.076	0	40	30	0	30			24
1	1978-08-03	260	195	203	39	32	1017.51	100	3	21	3077.37		266.439	35.4743	1978-07-13	751.076	0	40	30	0	30			24
1	1978-07-13	220	150	204	61	51	2531.98	0	1	0	7648.02		0	0	1978-07-13	2531.98	0	0	0	0	0			24
1	1978-07-17	255	160	204	61	51	2531.98	0	2	4	7648.02		0	0	1978-07-13	2531.98	0	0	0	0	0			24
1	1978-07-21	265	160	204	62	51	2577.39	0	2	8	7785.08		45.4158	1.79369	1978-07-13	2531.98	0	0	0	0	0			24
1	1978-07-24	270	170	204	65	54	2858.37	10	2	11	8633.06		326.388	12.8906	1978-07-13	2531.98	0	0	0	0	10			24
1	1978-07-27	260	185	204	66	54	2906.61	10	2	14	8778.65		374.63	14.7959	1978-07-13	2531.98	0	0	0	0	10			24
1	1978-08-01	300	190	204	66	54	2906.61	10	2	19	8778.65		374.63	14.7959	1978-07-13	2531.98	0	0	0	0	10			24
1	1978-08-03	260	195	204	66	54	2906.61	10	2	21	8778.65		374.63	14.7959	1978-07-13	2531.98	0	0	0	0	10			24
1	1978-08-09	210	170	204	66	56	3004.3	100	2	27	9073.49		472.324	18.6543	1978-07-13	2531.98	0	0	0	1	99			24
1	1978-08-13	190	165	204	66	56	3004.3	100	2	31	9073.49		472.324	18.6543	1978-07-13	2531.98	0	0	20	10	70			24
1	1978-08-18	235	180	204	66	56	3004.3	100	3	36	9073.49		472.324	18.6543	1978-07-13	2531.98	0	0	20	10	70			24
1	1978-07-13	220	150	205	51	43	1783.53	0	1	0	5389.19		0	0	1978-07-13	1783.53	0	0	0	0	0			24
1	1978-07-17	255	160	205	51	43	1783.53	0	2	4	5389.19		0	0	1978-07-13	1783.53	0	0	0	0	0			24
1	1978-07-21	265	160	205	53	44	1899.19	0	2	8	5738.25		115.659	6.48483	1978-07-13	1783.53	0	0	0	0	0			24
1	1978-07-24	270	170	205	55	45	2018.48	0	2	11	6098.27		234.951	13.1734	1978-07-13	1783.53	0	0	0	0	0			24
1	1978-07-27	260	185	205	55	45	2018.48	0	2	14	6098.27		234.951	13.1734	1978-07-13	1783.53	0	0	0	0	0			24
1	1978-08-01	300	190	205	55	45	2018.48	0	2	19	6098.27		234.951	13.1734	1978-07-13	1783.53	0	0	0	0	0			24
1	1978-08-03	260	195	205	55	45	2018.48	0	2	21	6098.27		234.951	13.1734	1978-07-13	1783.53	0	0	0	0	0			24
1	1978-08-09	210	170	205	55	45	2018.48	5	2	27	6098.27		234.951	13.1734	1978-07-13	1783.53	0	0	0	5	0			24
1	1978-08-13	190	165	205	55	45	2018.48	70	2	31	6098.27		234.951	13.1734	1978-07-13	1783.53	0	0	0	10	60			24
1	1978-08-18	235	180	205	55	45	2018.48	100	2	36	6098.27		234.951	13.1734	1978-07-13	1783.53	0	0	30	30	40			24
1	1978-08-23	215	190	205	55	45	2018.48	100	3	41	6098.27		234.951	13.1734	1978-07-13	1783.53	0	0	30	30	40			24
1	1978-07-13	220	150	206	47	37	1424.24	0	1	0	4304.86		0	0	1978-07-13	1424.24	0	0	0	0	0			24
1	1978-07-17	255	160	206	47	37	1424.24	0	2	4	4304.86		0	0	1978-07-13	1424.24	0	0	0	0	0			24
1	1978-07-21	265	160	206	48	37	1458.35	0	2	8	4407.81		34.1123	2.39512	1978-07-13	1424.24	0	0	0	0	0			24
1	1978-07-24	270	170	206	49	38	1527.79	0	2	11	4617.36		103.548	7.27041	1978-07-13	1424.24	0	0	0	0	0			24
1	1978-07-27	260	185	206	50	38	1563.11	0	2	14	4723.97		138.871	9.75057	1978-07-13	1424.24	0	0	0	0	0			24
1	1978-08-01	300	190	206	50	38	1563.11	5	2	19	4723.97		138.871	9.75057	1978-07-13	1424.24	0	0	0	0	5			24
1	1978-08-03	260	195	206	50	38	1563.11	5	2	21	4723.97		138.871	9.75057	1978-07-13	1424.24	0	0	0	0	5			24
1	1978-08-09	210	170	206	51	39	1634.97	75	2	27	4940.84		210.729	14.7959	1978-07-13	1424.24	0	0	0	5	70			24
1	1978-08-13	190	165	206	51	39	1634.97	100	2	31	4940.84		210.729	14.7959	1978-07-13	1424.24	0	0	60	15	25			24
1	1978-08-18	235	180	206	51	39	1634.97	100	3	36	4940.84		210.729	14.7959	1978-07-13	1424.24	0	0	60	15	25			24
1	1978-07-13	220	150	207	59	51	2442.36	0	1	0	7377.54		0	0	1978-07-13	2442.36	0	0	0	0	0			24
1	1978-07-17	255	160	207	59	52	2486.97	0	2	4	7512.17		44.6084	1.82645	1978-07-13	2442.36	0	0	0	0	0			24
1	1978-07-21	265	160	207	61	53	2623.21	0	2	8	7923.37		180.856	7.40496	1978-07-13	2442.36	0	0	0	0	0			24
1	1978-07-24	270	170	207	61	53	2623.21	0	3	11	7923.37		180.856	7.40496	1978-07-13	2442.36	0	0	0	0	0			24
1	1978-07-13	220	150	208	42	63	2225.37	0	1	0	6722.68		0	0	1978-07-13	2225.37	0	0	0	0	0			24
1	1978-07-17	255	160	208	43	63	2267.96	0	2	4	6851.21		42.5899	1.91383	1978-07-13	2225.37	0	0	0	0	0			24
1	1978-07-21	265	160	208	43	63	2267.96	0	2	8	6851.21		42.5899	1.91383	1978-07-13	2225.37	0	0	0	0	0			24
1	1978-07-24	270	170	208	43	63	2267.96	5	2	11	6851.21		42.5899	1.91383	1978-07-13	2225.37	5	0	0	0	0			24
1	1978-07-27	260	185	208	43	63	2267.96	5	2	14	6851.21		42.5899	1.91383	1978-07-13	2225.37	5	0	0	0	0			24
1	1978-08-01	300	190	208	44	63	2310.96	5	2	19	6980.97		85.5835	3.8458	1978-07-13	2225.37	5	0	0	0	0			25
1	1978-08-03	260	195	208	44	63	2310.96	100	2	21	6980.97		85.5835	3.8458	1978-07-13	2225.37	10	0	0	0	90			25
1	1978-08-09	210	170	208	44	63	2310.96	100	2	27	6980.97		85.5835	3.8458	1978-07-13	2225.37	10	0	10	0	80			25
1	1978-08-13	190	165	208	44	63	2310.96	100	2	31	6980.97		85.5835	3.8458	1978-07-13	2225.37	10	0	50	5	35			25
1	1978-08-18	235	180	208	44	63	2310.96	100	3	36	6980.97		85.5835	3.8458	1978-07-13	2225.37	10	0	50	5	35			25
1	1978-07-17	255	160	209	57	50	2310.96	0	1	0	6980.97		0	0	1978-07-17	2310.96	0	0	0	0	0			25
1	1978-07-21	265	160	209	57	50	2310.96	0	2	4	6980.97		0	0	1978-07-17	2310.96	0	0	0	0	0			25
1	1978-07-24	270	170	209	57	51	2354.35	0	2	7	7111.94		43.3973	1.87789	1978-07-17	2310.96	0	0	0	0	0			25
1	1978-07-27	260	185	209	58	51	2398.15	0	2	10	7244.13		87.1982	3.77326	1978-07-17	2310.96	0	0	0	0	0			25
1	1978-08-01	300	190	209	58	51	2398.15	0	2	15	7244.13		87.1982	3.77326	1978-07-17	2310.96	0	0	0	0	0			25
1	1978-08-03	260	195	209	59	51	2442.36	0	2	17	7377.54		131.403	5.68609	1978-07-17	2310.96	0	0	0	0	0			25
1	1978-08-09	210	170	209	60	51	2486.97	5	2	23	7512.17		176.011	7.61639	1978-07-17	2310.96	0	0	0	5	0			25
1	1978-08-13	190	165	209	60	51	2486.97	25	2	27	7512.17		176.011	7.61639	1978-07-17	2310.96	0	0	0	10	15			25
1	1978-08-18	235	180	209	60	51	2486.97	100	2	32	7512.17		176.011	7.61639	1978-07-17	2310.96	0	0	20	20	60			25
1	1978-08-23	215	190	209	60	51	2486.97	100	3	37	7512.17		176.011	7.61639	1978-07-17	2310.96	0	0	20	20	60			25
1	1978-07-17	255	160	210	47	37	1424.24	0	1	0	4304.86		0	0	1978-07-17	1424.24	0	0	0	0	0			25
1	1978-07-21	265	160	210	49	40	1598.84	0	2	4	4831.79		174.598	12.2591	1978-07-17	1424.24	0	0	0	0	0			25
1	1978-07-24	270	170	210	52	43	1821.68	0	2	7	5504.33		397.438	27.9053	1978-07-17	1424.24	0	0	0	0	0			25
1	1978-07-27	260	185	210	52	43	1821.68	0	2	10	5504.33		397.438	27.9053	1978-07-17	1424.24	0	0	0	0	0			25
1	1978-08-01	300	190	210	53	44	1899.19	0	2	15	5738.25		474.948	33.3475	1978-07-17	1424.24	0	0	0	0	0			25
1	1978-08-03	260	195	210	53	45	1938.55	0	2	17	5857.04		514.308	36.1111	1978-07-17	1424.24	0	0	0	0	0			25
1	1978-08-09	210	170	210	54	46	2018.48	5	2	23	6098.27		594.24	41.7234	1978-07-17	1424.24	0	0	0	5	0			25
1	1978-08-13	190	165	210	54	46	2018.48	100	2	27	6098.27		594.24	41.7234	1978-07-17	1424.24	0	0	0	30	70			25
1	1978-08-18	235	180	210	54	46	2018.48	100	2	32	6098.27		594.24	41.7234	1978-07-17	1424.24	0	0	20	40	40			25
1	1978-08-23	215	190	210	54	46	2018.48	100	3	37	6098.27		594.24	41.7234	1978-07-17	1424.24	0	0	20	40	40			25
1	1978-07-17	255	160	211	62	52	2623.21	0	1	0	7923.37		0	0	1978-07-17	2623.21	0	0	0	0	0			25
1	1978-07-21	265	160	211	63	53	2716.06	0	2	4	8203.59		92.85	3.53955	1978-07-17	2623.21	0	0	0	0	0			25
1	1978-07-24	270	170	211	63	53	2716.06	0	2	7	8203.59		92.85	3.53955	1978-07-17	2623.21	0	0	0	0	0			25
1	1978-07-27	260	185	211	63	53	2716.06	0	2	10	8203.59		92.85	3.53955	1978-07-17	2623.21	0	0	0	0	0			25
1	1978-08-01	300	190	211	63	53	2716.06	0	2	15	8203.59		92.85	3.53955	1978-07-17	2623.21	0	0	0	0	0			25
1	1978-08-03	260	195	211	63	53	2716.06	0	2	17	8203.59		92.85	3.53955	1978-07-17	2623.21	0	0	0	0	0			25
1	1978-08-09	210	170	211	63	54	2763.09	15	2	23	8345.53		139.881	5.33241	1978-07-17	2623.21	0	0	5	0	10			25
1	1978-08-13	190	165	211	63	54	2763.09	100	2	27	8345.53		139.881	5.33241	1978-07-17	2623.21	0	0	5	5	90			25
1	1978-08-18	235	180	211	63	54	2763.09	100	2	32	8345.53		139.881	5.33241	1978-07-17	2623.21	0	0	10	50	40			25
1	1978-08-23	215	190	211	63	54	2763.09	100	2	37	8345.53		139.881	5.33241	1978-07-17	2623.21	0	0	10	40	50			25
1	1978-08-25	240	180	211	63	54	2763.09	100	3	39	8345.53		139.881	5.33241	1978-07-17	2623.21	0	0	10	40	50			25
1	1978-07-17	255	160	212	58	52	2442.36	0	1	0	7377.54		0	0	1978-07-17	2442.36	0	0	0	0	0			25
1	1978-07-21	265	160	212	58	52	2442.36	0	2	4	7377.54		0	0	1978-07-17	2442.36	0	0	0	0	0			25
1	1978-07-24	270	170	212	59	53	2531.98	5	2	7	7648.02		89.6204	3.66942	1978-07-17	2442.36	5	0	0	0	0			25
1	1978-07-27	260	185	212	59	53	2531.98	5	2	10	7648.02		89.6204	3.66942	1978-07-17	2442.36	5	0	0	0	0			25
1	1978-08-01	300	190	212	59	54	2577.39	5	2	15	7785.08		135.036	5.52893	1978-07-17	2442.36	5	0	0	0	0			25
1	1978-08-03	260	195	212	59	54	2577.39	5	2	17	7785.08		135.036	5.52893	1978-07-17	2442.36	5	0	0	0	0			25
1	1978-08-09	210	170	212	60	54	2623.21	10	2	23	7923.37		180.856	7.40496	1978-07-17	2442.36	5	0	0	0	5			25
1	1978-08-13	190	165	212	60	54	2623.21	100	2	27	7923.37		180.856	7.40496	1978-07-17	2442.36	5	0	0	0	95			25
1	1978-08-18	235	180	212	60	54	2623.21	100	2	32	7923.37		180.856	7.40496	1978-07-17	2442.36	5	5	60	0	30			25
1	1978-08-23	215	190	212	60	54	2623.21	100	3	37	7923.37		180.856	7.40496	1978-07-17	2442.36	5	5	60	0	30			25
1	1978-07-17	255	160	213	55	50	2225.37	0	1	0	6722.68		0	0	1978-07-17	2225.37	0	0	0	0	0			25
1	1978-07-21	265	160	213	56	50	2267.96	0	2	4	6851.21		42.5899	1.91383	1978-07-17	2225.37	0	0	0	0	0			25
1	1978-07-24	270	170	213	58	53	2486.97	0	2	7	7512.17		261.595	11.7551	1978-07-17	2225.37	0	0	0	0	0			25
1	1978-07-27	260	185	213	58	53	2486.97	0	2	10	7512.17		261.595	11.7551	1978-07-17	2225.37	0	0	0	0	0			25
1	1978-08-01	300	190	213	59	54	2577.39	0	2	15	7785.08		352.023	15.8186	1978-07-17	2225.37	0	0	0	0	0			25
1	1978-08-03	260	195	213	59	54	2577.39	0	2	17	7785.08		352.023	15.8186	1978-07-17	2225.37	0	0	0	0	0			25
1	1978-08-09	210	170	213	60	54	2623.21	35	2	23	7923.37		397.842	17.8776	1978-07-17	2225.37	0	0	0	5	30			25
1	1978-08-13	190	165	213	60	54	2623.21	100	2	27	7923.37		397.842	17.8776	1978-07-17	2225.37	0	0	0	5	95			25
1	1978-08-18	235	180	213	60	54	2623.21	100	2	32	7923.37		397.842	17.8776	1978-07-17	2225.37	0	0	0	15	85			25
1	1978-08-23	215	190	213	60	54	2623.21	100	2	37	7923.37		397.842	17.8776	1978-07-17	2225.37	0	0	30	30	40			25
1	1978-08-25	240	180	213	60	54	2623.21	100	3	39	7923.37		397.842	17.8776	1978-07-17	2225.37	0	0	30	30	40			25
1	1978-07-17	255	160	214	67	54	2955.25	0	1	0	8925.46		0	0	1978-07-17	2955.25	0	0	0	0	0			25
1	1978-07-21	265	160	214	68	54	3004.3	0	2	4	9073.49		49.049	1.65972	1978-07-17	2955.25	0	0	0	0	0			25
1	1978-07-24	270	170	214	68	55	3053.76	0	2	7	9222.74		98.5017	3.33311	1978-07-17	2955.25	0	0	0	0	0			25
1	1978-07-27	260	185	214	68	55	3053.76	0	2	10	9222.74		98.5017	3.33311	1978-07-17	2955.25	0	0	0	0	0			25
1	1978-08-01	300	190	214	69	55	3103.61	0	2	15	9373.21		148.358	5.02015	1978-07-17	2955.25	0	0	0	0	0			26
1	1978-08-03	260	195	214	69	55	3103.61	0	2	17	9373.21		148.358	5.02015	1978-07-17	2955.25	0	0	0	0	0			26
1	1978-08-09	210	170	214	69	56	3153.87	0	2	23	9524.89		198.618	6.72085	1978-07-17	2955.25	0	0	0	0	0			26
1	1978-08-13	190	165	214	69	56	3153.87	10	2	27	9524.89		198.618	6.72085	1978-07-17	2955.25	0	0	0	10	0			26
1	1978-08-18	235	180	214	69	56	3153.87	10	3	32	9524.89		198.618	6.72085	1978-07-17	2955.25	0	0	0	10	0			26
1	1978-07-21	265	160	215	60	52	2531.98	0	1	0	7648.02		0	0	1978-07-21	2531.98	0	0	0	0	0			26
1	1978-07-24	270	170	215	62	53	2669.44	0	2	3	8062.87		137.458	5.42889	1978-07-21	2531.98	0	0	0	0	0			26
1	1978-07-27	260	185	215	63	54	2763.09	0	2	6	8345.53		231.116	9.12787	1978-07-21	2531.98	0	0	0	0	0			26
1	1978-08-01	300	190	215	63	54	2763.09	0	2	11	8345.53		231.116	9.12787	1978-07-21	2531.98	0	0	0	0	0			26
1	1978-08-03	260	195	215	64	55	2858.37	0	2	13	8633.06		326.388	12.8906	1978-07-21	2531.98	0	0	0	0	0			26
1	1978-08-09	210	170	215	64	56	2906.61	0	2	19	8778.65		374.63	14.7959	1978-07-21	2531.98	0	0	0	0	0			26
1	1978-08-13	190	165	215	64	56	2906.61	10	2	23	8778.65		374.63	14.7959	1978-07-21	2531.98	5	0	0	5	0			26
1	1978-08-18	235	180	215	64	56	2906.61	100	2	28	8778.65		374.63	14.7959	1978-07-21	2531.98	5	0	0	10	85			26
1	1978-08-23	215	190	215	64	56	2906.61	100	2	33	8778.65		374.63	14.7959	1978-07-21	2531.98	5	0	30	35	30			26
1	1978-08-25	240	180	215	64	56	2906.61	100	3	35	8778.65		374.63	14.7959	1978-07-21	2531.98	5	0	30	35	30			26
1	1978-07-21	265	160	216	58	53	2486.97	0	1	0	7512.17		0	0	1978-07-21	2486.97	0	0	0	0	0			26
1	1978-07-24	270	170	216	65	59	3103.61	0	2	3	9373.21		616.645	24.7951	1978-07-21	2486.97	0	0	0	0	0			26
1	1978-07-27	260	185	216	65	60	3153.87	0	2	6	9524.89		666.905	26.816	1978-07-21	2486.97	0	0	0	0	0			26
1	1978-08-01	300	190	216	66	60	3204.54	0	2	11	9677.79		717.569	28.8532	1978-07-21	2486.97	0	0	0	0	0			26
1	1978-08-03	260	195	216	66	61	3255.6	0	2	13	9831.92		768.636	30.9066	1978-07-21	2486.97	0	0	0	0	0			26
1	1978-08-09	210	170	216	68	62	3411.23	20	2	19	10301.6		924.261	37.1642	1978-07-21	2486.97	0	0	0	5	15			26
1	1978-08-13	190	165	216	68	62	3411.23	100	2	23	10301.6		924.261	37.1642	1978-07-21	2486.97	0	0	15	5	80			26
1	1978-08-18	235	180	216	68	62	3411.23	100	3	28	10301.6		924.261	37.1642	1978-07-21	2486.97	0	0	15	5	80			26
1	1978-07-21	265	160	217	65	56	2955.25	0	1	0	8925.46		0	0	1978-07-21	2955.25	0	0	0	0	0			26
1	1978-07-24	270	170	217	65	56	2955.25	0	2	3	8925.46		0	0	1978-07-21	2955.25	0	0	0	0	0			26
1	1978-07-27	260	185	217	65	56	2955.25	0	2	6	8925.46		0	0	1978-07-21	2955.25	0	0	0	0	0			26
1	1978-08-01	300	190	217	66	56	3004.3	0	2	11	9073.49		49.049	1.65972	1978-07-21	2955.25	0	0	0	0	0			26
1	1978-08-03	260	195	217	66	56	3004.3	0	2	13	9073.49		49.049	1.65972	1978-07-21	2955.25	0	0	0	0	0			26
1	1978-08-09	210	170	217	68	58	3204.54	15	2	19	9677.79		249.282	8.43522	1978-07-21	2955.25	0	0	0	0	15			26
1	1978-08-13	190	165	217	68	58	3204.54	21	2	23	9677.79		249.282	8.43522	1978-07-21	2955.25	0	0	0	1	20			26
1	1978-08-18	235	180	217	68	58	3204.54	21	3	28	9677.79		249.282	8.43522	1978-07-21	2955.25	0	0	0	1	20			26
1	1978-07-21	265	160	218	42	40	1357.22	0	1	0	4102.61		0	0	1978-07-21	1357.22	0	0	0	0	0			26
1	1978-07-24	270	170	218	44	42	1492.87	0	2	3	4511.98		135.642	9.99405	1978-07-21	1357.22	0	0	0	0	0			26
1	1978-07-27	260	185	218	44	43	1527.79	0	2	6	4617.36		170.561	12.5669	1978-07-21	1357.22	0	0	0	0	0			26
1	1978-08-01	300	190	218	45	43	1563.11	0	2	11	4723.97		205.885	15.1695	1978-07-21	1357.22	0	0	0	0	0			26
1	1978-08-03	260	195	218	45	43	1563.11	30	2	13	4723.97		205.885	15.1695	1978-07-21	1357.22	0	0	0	0	30			26
1	1978-08-09	210	170	218	45	43	1563.11	100	2	19	4723.97		205.885	15.1695	1978-07-21	1357.22	0	0	0	0	100			26
1	1978-08-13	190	165	218	45	43	1563.11	100	3	23	4723.97		205.885	15.1695	1978-07-21	1357.22	0	0	0	0	100			26
1	1978-07-21	265	160	219	52	45	1899.19	0	1	0	5738.25		0	0	1978-07-21	1899.19	0	0	0	0	0			26
1	1978-07-24	270	170	219	56	47	2141.4	0	2	3	6469.26		242.217	12.7537	1978-07-21	1899.19	0	0	0	0	0			26
1	1978-07-27	260	185	219	56	47	2141.4	0	2	6	6469.26		242.217	12.7537	1978-07-21	1899.19	0	0	0	0	0			26
1	1978-08-01	300	190	219	56	48	2183.19	10	2	11	6595.36		284	14.9538	1978-07-21	1899.19	0	0	5	0	5			26
1	1978-08-03	260	195	219	56	48	2183.19	10	3	13	6595.36		284	14.9538	1978-07-21	1899.19	0	0	5	0	5			26
1	1978-07-21	265	160	220	49	40	1598.84	0	1	0	4831.79		0	0	1978-07-21	1598.84	0	0	0	0	0			26
1	1978-07-24	270	170	220	54	47	2059.05	0	2	3	6220.72		460.213	28.7842	1978-07-21	1598.84	0	0	0	0	0			26
1	1978-07-27	260	185	220	55	47	2100.02	0	2	6	6344.38		501.188	31.3471	1978-07-21	1598.84	0	0	0	0	0			26
1	1978-08-01	300	190	220	56	48	2183.19	0	2	11	6595.36		584.349	36.5484	1978-07-21	1598.84	0	0	0	0	0			26
1	1978-08-03	260	195	220	56	48	2183.19	0	2	13	6595.36		584.349	36.5484	1978-07-21	1598.84	0	0	0	0	0			26
1	1978-08-09	210	170	220	56	48	2183.19	11	2	19	6595.36		584.349	36.5484	1978-07-21	1598.84	0	0	0	1	10			26
1	1978-08-13	190	165	220	56	48	2183.19	20	2	23	6595.36		584.349	36.5484	1978-07-21	1598.84	0	0	0	10	10			26
1	1978-08-18	235	180	220	56	48	2183.19	20	3	28	6595.36		584.349	36.5484	1978-07-21	1598.84	0	0	0	10	10			26
1	1978-07-21	265	160	221	21	22	373.217	0	1	0	1132.87		0	0	1978-07-21	373.217	0	0	0	0	0			26
1	1978-07-24	270	170	221	25	26	525.006	0	2	3	1590.97		151.79	40.6706	1978-07-21	373.217	0	0	0	0	0			26
1	1978-07-27	260	185	221	28	29	655.804	0	2	6	1985.72		282.587	75.7166	1978-07-21	373.217	0	0	0	0	0			26
1	1978-08-01	300	190	221	29	30	702.632	100	2	11	2127.05		329.416	88.2639	1978-07-21	373.217	0	0	0	0	100			26
1	1978-08-03	260	195	221	29	30	702.632	100	2	13	2127.05		329.416	88.2639	1978-07-21	373.217	0	0	40	0	60			26
1	1978-08-09	210	170	221	29	30	702.632	100	2	19	2127.05		329.416	88.2639	1978-07-21	373.217	0	40	5	0	55			26
1	1978-08-13	190	165	221	29	30	702.632	100	2	23	2127.05		329.416	88.2639	1978-07-21	373.217	0	40	20	0	40			26
1	1978-08-18	235	180	221	29	30	702.632	100	3	28	2127.05		329.416	88.2639	1978-07-21	373.217	0	40	20	0	40			26
1	1978-07-21	265	160	222	37	32	960.997	0	1	0	2906.8		0	0	1978-07-21	960.997	0	0	0	0	0			26
1	1978-07-24	270	170	222	40	35	1135.39	0	2	3	3433.12		174.396	18.1474	1978-07-21	960.997	0	0	0	0	0			26
1	1978-07-27	260	185	222	41	32	1075.65	0	2	6	3252.81		114.65	11.9303	1978-07-21	960.997	0	0	0	0	0			27
1	1978-08-01	300	190	222	41	37	1228.04	0	2	11	3712.74		267.045	27.7883	1978-07-21	960.997	0	0	0	0	0			27
1	1978-08-03	260	195	222	41	37	1228.04	5	2	13	3712.74		267.045	27.7883	1978-07-21	960.997	5	0	0	0	0			27
1	1978-08-09	210	170	222	41	37	1228.04	10	2	19	3712.74		267.045	27.7883	1978-07-21	960.997	5	0	0	5	0			27
1	1978-08-13	190	165	222	41	37	1228.04	30	2	23	3712.74		267.045	27.7883	1978-07-21	960.997	5	0	0	25	0			27
1	1978-08-18	235	180	222	41	37	1228.04	100	2	28	3712.74		267.045	27.7883	1978-07-21	960.997	0	0	20	40	40			27
1	1978-08-23	215	190	222	41	37	1228.04	100	3	33	3712.74		267.045	27.7883	1978-07-21	960.997	0	0	20	40	40			27
1	1978-07-24	270	170	223	44	39	1390.53	0	1	0	4203.12		0	0	1978-07-24	1390.53	0	0	0	0	0			27
1	1978-07-27	260	185	223	44	39	1390.53	0	2	3	4203.12		0	0	1978-07-24	1390.53	0	0	0	0	0			27
1	1978-08-01	300	190	223	44	39	1390.53	0	2	8	4203.12		0	0	1978-07-24	1390.53	0	0	0	0	0			27
1	1978-08-03	260	195	223	44	39	1390.53	0	2	10	4203.12		0	0	1978-07-24	1390.53	0	0	0	0	0			27
1	1978-08-09	210	170	223	45	39	1424.24	50	2	16	4304.86		33.7086	2.42415	1978-07-24	1390.53	0	0	0	0	50			27
1	1978-08-13	190	165	223	45	39	1424.24	100	2	20	4304.86		33.7086	2.42415	1978-07-24	1390.53	0	0	0	0	100			27
1	1978-08-18	235	180	223	45	39	1424.24	100	3	25	4304.86		33.7086	2.42415	1978-07-24	1390.53	0	0	0	0	100			27
1	1978-07-24	270	170	224	67	57	3103.61	0	1	0	9373.21		0	0	1978-07-24	3103.61	0	0	0	0	0			27
1	1978-07-27	260	185	224	67	57	3103.61	0	2	3	9373.21		0	0	1978-07-24	3103.61	0	0	0	0	0			27
1	1978-08-01	300	190	224	67	57	3103.61	0	2	8	9373.21		0	0	1978-07-24	3103.61	0	0	0	0	0			27
1	1978-08-03	260	195	224	67	57	3103.61	0	2	10	9373.21		0	0	1978-07-24	3103.61	0	0	0	0	0			27
1	1978-08-09	210	170	224	68	58	3204.54	0	2	16	9677.79		100.924	3.25182	1978-07-24	3103.61	0	0	0	0	0			27
1	1978-08-13	190	165	224	68	58	3204.54	40	2	20	9677.79		100.924	3.25182	1978-07-24	3103.61	0	0	0	0	40			27
1	1978-08-18	235	180	224	68	58	3204.54	40	3	25	9677.79		100.924	3.25182	1978-07-24	3103.61	0	0	0	0	40			27
1	1978-07-24	270	170	225	27	26	566.99	0	1	0	1717.68		0	0	1978-07-24	566.99	0	0	0	0	0			27
1	1978-07-27	260	185	225	27	26	566.99	0	2	3	1717.68		0	0	1978-07-24	566.99	0	0	0	0	0			27
1	1978-08-01	300	190	225	28	26	588.588	0	2	8	1782.87		21.5977	3.80918	1978-07-24	566.99	0	0	0	0	0			27
1	1978-08-03	260	195	225	28	26	588.588	0	2	10	1782.87		21.5977	3.80918	1978-07-24	566.99	0	0	0	0	0			27
1	1978-08-09	210	170	225	28	26	588.588	100	2	16	1782.87		21.5977	3.80918	1978-07-24	566.99	0	5	0	0	95			27
1	1978-08-13	190	165	225	28	26	588.588	100	3	20	1782.87		21.5977	3.80918	1978-07-24	566.99	0	5	0	0	95			27
1	1978-07-24	270	170	226	39	35	1105.32	0	1	0	3342.36		0	0	1978-07-24	1105.32	0	0	0	0	0			27
1	1978-07-27	260	185	226	39	35	1105.32	0	2	3	3342.36		0	0	1978-07-24	1105.32	0	0	0	0	0			27
1	1978-08-01	300	190	226	39	36	1135.39	5	2	8	3433.12		30.0753	2.72096	1978-07-24	1105.32	5	0	0	0	0			27
1	1978-08-03	260	195	226	39	36	1135.39	35	2	10	3433.12		30.0753	2.72096	1978-07-24	1105.32	5	30	0	0	0			27
1	1978-08-09	210	170	226	39	36	1135.39	100	2	16	3433.12		30.0753	2.72096	1978-07-24	1105.32	5	30	0	0	65			27
1	1978-08-13	190	165	226	39	36	1135.39	100	3	20	3433.12		30.0753	2.72096	1978-07-24	1105.32	5	30	0	0	65			27
1	1978-07-24	270	170	227	64	51	2669.44	0	1	0	8062.87		0	0	1978-07-24	2669.44	0	0	0	0	0			27
1	1978-07-27	260	185	227	65	52	2763.09	0	2	3	8345.53		93.6574	3.50851	1978-07-24	2669.44	0	0	0	0	0			27
1	1978-08-01	300	190	227	66	52	2810.53	0	2	8	8488.68		141.092	5.28544	1978-07-24	2669.44	0	0	0	0	0			27
1	1978-08-03	260	195	227	67	53	2906.61	0	2	10	8778.65		237.171	8.88469	1978-07-24	2669.44	0	0	0	0	0			27
1	1978-08-09	210	170	227	70	56	3204.54	0	2	16	9677.79		535.099	20.0454	1978-07-24	2669.44	0	0	0	0	0			27
1	1978-08-13	190	165	227	70	56	3204.54	0	2	20	9677.79		535.099	20.0454	1978-07-24	2669.44	0	0	0	0	0			27
1	1978-08-18	235	180	227	70	56	3204.54	10	2	25	9677.79		535.099	20.0454	1978-07-24	2669.44	0	0	0	10	0			27
1	1978-08-23	215	190	227	70	56	3204.54	100	2	30	9677.79		535.099	20.0454	1978-07-24	2669.44	0	0	10	20	70			27
1	1978-08-25	240	180	227	70	56	3204.54	100	3	32	9677.79		535.099	20.0454	1978-07-24	2669.44	0	0	10	20	70			27
1	1978-07-24	270	170	228	37	30	906.095	0	1	0	2741.1		0	0	1978-07-24	906.095	0	0	0	0	0			27
1	1978-07-27	260	185	228	37	31	933.344	0	2	3	2823.34		27.2495	3.00735	1978-07-24	906.095	0	0	0	0	0			27
1	1978-08-01	300	190	228	38	31	960.997	0	2	8	2906.8		54.9026	6.05926	1978-07-24	906.095	0	0	0	0	0			27
1	1978-08-03	260	195	228	39	31	989.054	0	2	10	2991.47		82.9594	9.15571	1978-07-24	906.095	0	0	0	0	0			27
1	1978-08-09	210	170	228	39	31	989.054	0	2	16	2991.47		82.9594	9.15571	1978-07-24	906.095	0	0	0	0	0			27
1	1978-08-13	190	165	228	39	31	989.054	0	2	20	2991.47		82.9594	9.15571	1978-07-24	906.095	0	0	0	0	0			27
1	1978-08-18	235	180	228	39	31	989.054	5	2	25	2991.47		82.9594	9.15571	1978-07-24	906.095	0	0	0	5	0			27
1	1978-08-23	215	190	228	39	31	989.054	100	2	30	2991.47		82.9594	9.15571	1978-07-24	906.095	0	0	0	20	80			27
1	1978-08-25	240	180	228	39	31	989.054	100	2	32	2991.47		82.9594	9.15571	1978-07-24	906.095	0	0	10	30	60			27
1	1978-08-30	190	140	228	39	31	989.054	100	3	37	2991.47		82.9594	9.15571	1978-07-24	906.095	0	0	10	30	60			27
1	1978-07-24	270	170	229	41	38	1259.73	0	1	0	3808.38		0	0	1978-07-24	1259.73	0	0	0	0	0			27
1	1978-07-27	260	185	229	42	38	1291.83	0	2	3	3905.24		32.0938	2.54767	1978-07-24	1259.73	0	0	0	0	0			27
1	1978-08-01	300	190	229	42	38	1291.83	0	2	8	3905.24		32.0938	2.54767	1978-07-24	1259.73	0	0	0	0	0			27
1	1978-08-03	260	195	229	42	38	1291.83	0	2	10	3905.24		32.0938	2.54767	1978-07-24	1259.73	0	0	0	0	0			27
1	1978-08-09	210	170	229	43	39	1357.22	0	2	16	4102.61		97.4925	7.73914	1978-07-24	1259.73	0	0	0	0	0			27
1	1978-08-13	190	165	229	43	39	1357.22	1	2	20	4102.61		97.4925	7.73914	1978-07-24	1259.73	0	0	0	1	0			27
1	1978-08-18	235	180	229	43	39	1357.22	5	2	25	4102.61		97.4925	7.73914	1978-07-24	1259.73	0	0	0	5	0			27
1	1978-08-23	215	190	229	43	39	1357.22	100	2	30	4102.61		97.4925	7.73914	1978-07-24	1259.73	0	0	0	25	75			27
1	1978-08-25	240	180	229	43	39	1357.22	100	2	32	4102.61		97.4925	7.73914	1978-07-24	1259.73	0	0	20	50	30			27
1	1978-08-30	190	140	229	43	39	1357.22	100	3	37	4102.61		97.4925	7.73914	1978-07-24	1259.73	0	0	20	50	30			28
1	1978-07-24	270	170	230	55	48	2141.4	0	1	0	6469.26		0	0	1978-07-24	2141.4	0	0	0	0	0			28
1	1978-07-27	260	185	230	55	48	2141.4	0	2	3	6469.26		0	0	1978-07-24	2141.4	0	0	0	0	0			28
1	1978-08-01	300	190	230	57	48	2225.37	0	2	8	6722.68		83.9687	3.9212	1978-07-24	2141.4	0	0	0	0	0			28
1	1978-08-03	260	195	230	57	48	2225.37	0	2	10	6722.68		83.9687	3.9212	1978-07-24	2141.4	0	0	0	0	0			28
1	1978-08-09	210	170	230	57	48	2225.37	0	2	16	6722.68		83.9687	3.9212	1978-07-24	2141.4	0	0	0	0	0			28
1	1978-08-13	190	165	230	57	48	2225.37	1	2	20	6722.68		83.9687	3.9212	1978-07-24	2141.4	0	0	0	1	0			28
1	1978-08-18	235	180	230	57	48	2225.37	1	2	25	6722.68		83.9687	3.9212	1978-07-24	2141.4	0	0	0	1	0			28
1	1978-08-23	215	190	230	57	48	2225.37	55	2	30	6722.68		83.9687	3.9212	1978-07-24	2141.4	0	0	0	15	40			28
1	1978-08-25	240	180	230	57	48	2225.37	55	3	32	6722.68		83.9687	3.9212	1978-07-24	2141.4	0	0	0	15	40			28
1	1978-07-24	270	170	231	44	37	1324.32	0	1	0	4003.31		0	0	1978-07-24	1324.32	0	0	0	0	0			28
1	1978-07-27	260	185	231	44	38	1357.22	0	2	3	4102.61		32.9012	2.48438	1978-07-24	1324.32	0	0	0	0	0			28
1	1978-08-01	300	190	231	45	39	1424.24	0	2	8	4304.86		99.9147	7.54458	1978-07-24	1324.32	0	0	0	0	0			28
1	1978-08-03	260	195	231	45	39	1424.24	10	2	10	4304.86		99.9147	7.54458	1978-07-24	1324.32	0	0	0	0	10			28
1	1978-08-09	210	170	231	45	39	1424.24	100	2	16	4304.86		99.9147	7.54458	1978-07-24	1324.32	0	0	0	0	100			28
1	1978-08-13	190	165	231	45	39	1424.24	100	2	20	4304.86		99.9147	7.54458	1978-07-24	1324.32	0	0	20	0	80			28
1	1978-08-18	235	180	231	45	39	1424.24	100	3	25	4304.86		99.9147	7.54458	1978-07-24	1324.32	0	0	20	0	80			28
1	1978-07-24	270	170	232	58	49	2310.96	0	1	0	6980.97		0	0	1978-07-24	2310.96	0	0	0	0	0			28
1	1978-07-27	260	185	232	58	50	2354.35	0	2	3	7111.94		43.3973	1.87789	1978-07-24	2310.96	0	0	0	0	0			28
1	1978-08-01	300	190	232	59	50	2398.15	0	2	8	7244.13		87.1982	3.77326	1978-07-24	2310.96	0	0	0	0	0			28
1	1978-08-03	260	195	232	60	52	2531.98	0	2	10	7648.02		221.023	9.56415	1978-07-24	2310.96	0	0	0	0	0			28
1	1978-08-09	210	170	232	63	53	2716.06	0	2	16	8203.59		405.109	17.5299	1978-07-24	2310.96	0	0	0	0	0			28
1	1978-08-13	190	165	232	63	53	2716.06	0	2	20	8203.59		405.109	17.5299	1978-07-24	2310.96	0	0	0	0	0			28
1	1978-08-18	235	180	232	63	54	2763.09	5	2	25	8345.53		452.139	19.565	1978-07-24	2310.96	0	0	0	5	0			28
1	1978-08-23	215	190	232	63	54	2763.09	40	2	30	8345.53		452.139	19.565	1978-07-24	2310.96	0	0	0	30	10			28
1	1978-08-25	240	180	232	63	54	2763.09	100	2	32	8345.53		452.139	19.565	1978-07-24	2310.96	0	0	0	50	50			28
1	1978-08-30	190	140	232	63	54	2763.09	100	3	37	8345.53		452.139	19.565	1978-07-24	2310.96	0	0	0	50	50			28
1	1978-07-24	270	170	233	45	40	1458.35	0	1	0	4407.81		0	0	1978-07-24	1458.35	0	0	0	0	0			28
1	1978-07-27	260	185	233	46	40	1492.87	0	2	3	4511.98		34.516	2.36678	1978-07-24	1458.35	0	0	0	0	0			28
1	1978-08-01	300	190	233	46	40	1492.87	0	2	8	4511.98		34.516	2.36678	1978-07-24	1458.35	0	0	0	0	0			28
1	1978-08-03	260	195	233	46	41	1527.79	0	2	10	4617.36		69.4356	4.76125	1978-07-24	1458.35	0	0	0	0	0			28
1	1978-08-09	210	170	233	47	43	1634.97	0	2	16	4940.84		176.617	12.1107	1978-07-24	1458.35	0	0	0	0	0			28
1	1978-08-13	190	165	233	47	43	1634.97	5	2	20	4940.84		176.617	12.1107	1978-07-24	1458.35	0	0	0	5	0			28
1	1978-08-18	235	180	233	47	43	1634.97	100	2	25	4940.84		176.617	12.1107	1978-07-24	1458.35	0	0	0	15	85			28
1	1978-08-23	215	190	233	47	43	1634.97	100	2	30	4940.84		176.617	12.1107	1978-07-24	1458.35	0	0	0	45	55			28
1	1978-08-25	240	180	233	47	43	1634.97	100	3	32	4940.84		176.617	12.1107	1978-07-24	1458.35	0	0	0	45	55			28
1	1978-07-24	270	170	234	71	65	3733.38	0	1	0	11273.8		0	0	1978-07-24	3733.38	0	0	0	0	0			28
1	1978-07-27	260	185	234	74	66	3956.22	0	2	3	11946.4		222.84	5.96886	1978-07-24	3733.38	0	0	0	0	0			28
1	1978-08-01	300	190	234	75	67	4070.06	0	2	8	12289.9		336.682	9.01817	1978-07-24	3733.38	0	0	0	0	0			28
1	1978-08-03	260	195	234	76	67	4127.59	0	2	10	12463.6		394.209	10.559	1978-07-24	3733.38	0	0	0	0	0			28
1	1978-08-09	210	170	234	78	68	4302.59	0	2	16	12991.7		569.211	15.2465	1978-07-24	3733.38	0	0	0	0	0			28
1	1978-08-13	190	165	234	78	68	4302.59	50	2	20	12991.7		569.211	15.2465	1978-07-24	3733.38	0	0	0	0	50			28
1	1978-08-18	235	180	234	78	68	4302.59	100	2	25	12991.7		569.211	15.2465	1978-07-24	3733.38	0	0	30	5	65			28
1	1978-08-23	215	190	234	78	68	4302.59	100	3	30	12991.7		569.211	15.2465	1978-07-24	3733.38	0	0	30	5	65			28
1	1978-07-24	270	170	235	55	47	2100.02	0	1	0	6344.38		0	0	1978-07-24	2100.02	0	0	0	0	0			28
1	1978-07-27	260	185	235	56	47	2141.4	0	2	3	6469.26		41.3788	1.9704	1978-07-24	2100.02	0	0	0	0	0			28
1	1978-08-01	300	190	235	58	48	2267.96	0	2	8	6851.21		167.937	7.99692	1978-07-24	2100.02	0	0	0	0	0			28
1	1978-08-03	260	195	235	60	51	2486.97	0	2	10	7512.17		386.942	18.4256	1978-07-24	2100.02	0	0	0	0	0			28
1	1978-08-09	210	170	235	63	52	2669.44	0	2	16	8062.87		569.413	27.1146	1978-07-24	2100.02	0	0	0	0	0			28
1	1978-08-13	190	165	235	63	52	2669.44	0	2	20	8062.87		569.413	27.1146	1978-07-24	2100.02	0	0	0	0	0			28
1	1978-08-18	235	180	235	63	53	2716.06	5	2	25	8203.59		616.039	29.3349	1978-07-24	2100.02	0	0	0	5	0			28
1	1978-08-23	215	190	235	63	53	2716.06	100	2	30	8203.59		616.039	29.3349	1978-07-24	2100.02	0	0	0	35	65			28
1	1978-08-25	240	180	235	63	53	2716.06	100	3	32	8203.59		616.039	29.3349	1978-07-24	2100.02	0	0	0	35	65			28
1	1978-07-24	270	170	236	38	36	1105.32	0	1	0	3342.36		0	0	1978-07-24	1105.32	0	0	0	0	0			28
1	1978-07-27	260	185	236	38	37	1135.39	0	2	3	3433.12		30.0753	2.72096	1978-07-24	1105.32	0	0	0	0	0			28
1	1978-08-01	300	190	236	38	37	1135.39	0	2	8	3433.12		30.0753	2.72096	1978-07-24	1105.32	0	0	0	0	0			28
1	1978-08-03	260	195	236	38	38	1165.87	0	2	10	3525.11		60.5543	5.47845	1978-07-24	1105.32	0	0	0	0	0			28
1	1978-08-09	210	170	236	40	37	1196.76	100	2	16	3618.31		91.4371	8.27246	1978-07-24	1105.32	0	0	0	0	100			28
1	1978-08-13	190	165	236	40	37	1196.76	100	2	20	3618.31		91.4371	8.27246	1978-07-24	1105.32	0	0	0	0	100			28
1	1978-08-18	235	180	236	40	37	1196.76	100	3	25	3618.31		91.4371	8.27246	1978-07-24	1105.32	0	0	0	0	100			28
1	1978-07-27	260	185	237	48	41	1598.84	0	1	0	4831.79		0	0	1978-07-27	1598.84	0	0	0	0	0			28
1	1978-08-01	300	190	237	49	42	1671.5	0	2	5	5051.1		72.6652	4.54488	1978-07-27	1598.84	0	0	0	0	0			29
1	1978-08-03	260	195	237	50	43	1745.78	0	2	7	5275.27		146.945	9.19076	1978-07-27	1598.84	0	0	0	0	0			29
1	1978-08-09	210	170	237	52	44	1860.23	0	2	13	5620.68		261.393	16.3489	1978-07-27	1598.84	0	0	0	0	0			29
1	1978-08-13	190	165	237	52	44	1860.23	100	2	17	5620.68		261.393	16.3489	1978-07-27	1598.84	0	0	40	0	60			29
1	1978-08-18	235	180	237	52	44	1860.23	100	3	22	5620.68		261.393	16.3489	1978-07-27	1598.84	0	0	40	0	60			29
1	1978-07-27	260	185	238	58	51	2398.15	0	1	0	7244.13		0	0	1978-07-27	2398.15	0	0	0	0	0			29
1	1978-08-01	300	190	238	60	54	2623.21	0	2	5	7923.37		225.06	9.38473	1978-07-27	2398.15	0	0	0	0	0			29
1	1978-08-03	260	195	238	61	54	2669.44	0	2	7	8062.87		271.283	11.3122	1978-07-27	2398.15	0	0	0	0	0			29
1	1978-08-09	210	170	238	61	54	2669.44	0	2	13	8062.87		271.283	11.3122	1978-07-27	2398.15	0	0	0	0	0			29
1	1978-08-13	190	165	238	61	55	2716.06	70	2	17	8203.59		317.91	13.2565	1978-07-27	2398.15	0	0	0	10	60			29
1	1978-08-18	235	180	238	61	55	2716.06	100	2	22	8203.59		317.91	13.2565	1978-07-27	2398.15	0	0	40	15	45			29
1	1978-08-23	215	190	238	61	55	2716.06	100	3	27	8203.59		317.91	13.2565	1978-07-27	2398.15	0	0	40	15	45			29
1	1978-07-27	260	185	239	54	50	2183.19	0	1	0	6595.36		0	0	1978-07-27	2183.19	0	0	0	0	0			29
1	1978-08-01	300	190	239	55	50	2225.37	0	2	5	6722.68		42.1862	1.93232	1978-07-27	2183.19	0	0	0	0	0			29
1	1978-08-03	260	195	239	56	50	2267.96	0	2	7	6851.21		84.7761	3.88314	1978-07-27	2183.19	0	0	0	0	0			29
1	1978-08-09	210	170	239	57	50	2310.96	0	2	13	6980.97		127.77	5.85244	1978-07-27	2183.19	0	0	0	0	0			29
1	1978-08-13	190	165	239	57	50	2310.96	30	2	17	6980.97		127.77	5.85244	1978-07-27	2183.19	0	0	0	0	30			29
1	1978-08-18	235	180	239	57	50	2310.96	30	3	22	6980.97		127.77	5.85244	1978-07-27	2183.19	0	0	0	0	30			29
1	1978-07-27	260	185	240	39	33	1046.38	0	1	0	3164.48		0	0	1978-07-27	1046.38	0	0	0	0	0			29
1	1978-08-01	300	190	240	39	33	1046.38	0	2	5	3164.48		0	0	1978-07-27	1046.38	0	0	0	0	0			29
1	1978-08-03	260	195	240	39	34	1075.65	0	2	7	3252.81		29.2679	2.79707	1978-07-27	1046.38	0	0	0	0	0			29
1	1978-08-09	210	170	240	40	35	1135.39	0	2	13	3433.12		89.0149	8.50694	1978-07-27	1046.38	0	0	0	0	0			29
1	1978-08-13	190	165	240	40	35	1135.39	0	3	17	3433.12		89.0149	8.50694	1978-07-27	1046.38	0	0	0	0	0			29
1	1978-07-27	260	185	241	44	37	1324.32	0	1	0	4003.31		0	0	1978-07-27	1324.32	0	0	0	0	0			29
1	1978-08-01	300	190	241	44	37	1324.32	0	2	5	4003.31		0	0	1978-07-27	1324.32	0	0	0	0	0			29
1	1978-08-03	260	195	241	45	38	1390.53	0	2	7	4203.12		66.2061	4.99924	1978-07-27	1324.32	0	0	0	0	0			29
1	1978-08-09	210	170	241	45	38	1390.53	0	2	13	4203.12		66.2061	4.99924	1978-07-27	1324.32	0	0	0	0	0			29
1	1978-08-13	190	165	241	47	38	1458.35	20	2	17	4407.81		134.027	10.1204	1978-07-27	1324.32	0	0	0	0	20			29
1	1978-08-18	235	180	241	47	38	1458.35	20	3	22	4407.81		134.027	10.1204	1978-07-27	1324.32	0	0	0	0	20			29
1	1978-07-27	260	185	242	46	38	1424.24	0	1	0	4304.86		0	0	1978-07-27	1424.24	0	0	0	0	0			29
1	1978-08-01	300	190	242	46	38	1424.24	0	2	5	4304.86		0	0	1978-07-27	1424.24	0	0	0	0	0			29
1	1978-08-03	260	195	242	48	39	1527.79	0	2	7	4617.36		103.548	7.27041	1978-07-27	1424.24	0	0	0	0	0			29
1	1978-08-09	210	170	242	50	42	1708.44	0	2	13	5162.58		284.202	19.9546	1978-07-27	1424.24	0	0	0	0	0			29
1	1978-08-13	190	165	242	52	42	1783.53	0	2	17	5389.19		359.289	25.2268	1978-07-27	1424.24	0	0	0	0	0			29
1	1978-08-18	235	180	242	52	42	1783.53	15	2	22	5389.19		359.289	25.2268	1978-07-27	1424.24	0	0	0	15	0			29
1	1978-08-23	215	190	242	52	42	1783.53	100	2	27	5389.19		359.289	25.2268	1978-07-27	1424.24	0	0	0	40	60			29
1	1978-08-25	240	180	242	52	42	1783.53	100	3	29	5389.19		359.289	25.2268	1978-07-27	1424.24	0	0	0	40	60			29
1	1978-07-27	260	185	243	46	40	1492.87	0	1	0	4511.98		0	0	1978-07-27	1492.87	0	0	0	0	0			29
1	1978-08-01	300	190	243	47	41	1563.11	0	2	5	4723.97		70.243	4.70525	1978-07-27	1492.87	0	0	0	0	0			29
1	1978-08-03	260	195	243	47	41	1563.11	100	2	7	4723.97		70.243	4.70525	1978-07-27	1492.87	0	0	0	0	100			29
1	1978-08-09	210	170	243	47	41	1563.11	100	3	13	4723.97		70.243	4.70525	1978-07-27	1492.87	0	0	0	0	100			29
1	1978-07-27	260	185	244	36	34	989.054	0	1	0	2991.47		0	0	1978-07-27	989.054	0	0	0	0	0			29
1	1978-08-01	300	190	244	36	34	989.054	0	2	5	2991.47		0	0	1978-07-27	989.054	0	0	0	0	0			29
1	1978-08-03	260	195	244	36	34	989.054	0	2	7	2991.47		0	0	1978-07-27	989.054	0	0	0	0	0			29
1	1978-08-09	210	170	244	36	34	989.054	0	2	13	2991.47		0	0	1978-07-27	989.054	0	0	0	0	0			29
1	1978-08-13	190	165	244	36	34	989.054	100	2	17	2991.47		0	0	1978-07-27	989.054	0	0	0	0	100			29
1	1978-08-18	235	180	244	36	35	1017.51	100	2	22	3077.37		28.4605	2.87755	1978-07-27	989.054	0	0	25	0	75			29
1	1978-08-23	215	190	244	36	35	1017.51	100	3	27	3077.37		28.4605	2.87755	1978-07-27	989.054	0	0	25	0	75			29
1	1978-07-27	260	185	245	56	54	2442.36	0	1	0	7377.54		0	0	1978-07-27	2442.36	0	0	0	0	0			29
1	1978-08-01	300	190	245	57	48	2225.37	0	2	5	6722.68		-216.986	-8.8843	1978-07-27	2442.36	0	0	0	0	0			29
1	1978-08-03	260	195	245	58	48	2267.96	0	2	7	6851.21		-174.396	-7.1405	1978-07-27	2442.36	0	0	0	0	0			29
1	1978-08-09	210	170	245	62	51	2577.39	0	2	13	7785.08		135.036	5.52893	1978-07-27	2442.36	0	0	0	0	0			29
1	1978-08-13	190	165	245	62	50	2531.98	0	2	17	7648.02		89.6204	3.66942	1978-07-27	2442.36	0	0	0	0	0			29
1	1978-08-18	235	180	245	62	50	2531.98	35	2	22	7648.02		89.6204	3.66942	1978-07-27	2442.36	0	0	0	5	30			29
1	1978-08-23	215	190	245	62	50	2531.98	60	2	27	7648.02		89.6204	3.66942	1978-07-27	2442.36	0	0	30	10	20			29
1	1978-08-25	240	180	245	62	50	2531.98	60	3	29	7648.02		89.6204	3.66942	1978-07-27	2442.36	0	0	30	10	20			29
1	1978-08-01	300	190	246	42	37	1259.73	0	1	0	3808.38		0	0	1978-08-01	1259.73	0	0	0	0	0			29
1	1978-08-03	260	195	246	42	38	1291.83	0	2	2	3905.24		32.0938	2.54767	1978-08-01	1259.73	0	0	0	0	0			29
1	1978-08-09	210	170	246	42	38	1291.83	5	2	8	3905.24		32.0938	2.54767	1978-08-01	1259.73	0	0	0	0	5			29
1	1978-08-13	190	165	246	43	38	1324.32	41	2	12	4003.31		64.5913	5.12738	1978-08-01	1259.73	0	0	0	1	40			29
1	1978-08-18	235	180	246	43	38	1324.32	100	2	17	4003.31		64.5913	5.12738	1978-08-01	1259.73	0	0	50	20	30			29
1	1978-08-23	215	190	246	43	38	1324.32	100	3	22	4003.31		64.5913	5.12738	1978-08-01	1259.73	0	0	50	20	30			30
1	1978-08-01	300	190	247	45	38	1390.53	0	1	0	4203.12		0	0	1978-08-01	1390.53	0	0	0	0	0			30
1	1978-08-03	260	195	247	46	38	1424.24	0	2	2	4304.86		33.7086	2.42415	1978-08-01	1390.53	0	0	0	0	0			30
1	1978-08-09	210	170	247	50	39	1598.84	0	2	8	4831.79		208.307	14.9804	1978-08-01	1390.53	0	0	0	0	0			30
1	1978-08-13	190	165	247	51	40	1671.5	0	2	12	5051.1		280.972	20.2061	1978-08-01	1390.53	0	0	0	0	0			30
1	1978-08-18	235	180	247	51	40	1671.5	5	2	17	5051.1		280.972	20.2061	1978-08-01	1390.53	0	0	0	5	0			30
1	1978-08-23	215	190	247	51	40	1671.5	100	2	22	5051.1		280.972	20.2061	1978-08-01	1390.53	0	0	20	20	60			30
1	1978-08-25	240	180	247	51	40	1671.5	100	3	24	5051.1		280.972	20.2061	1978-08-01	1390.53	0	0	20	20	60			30
1	1978-08-01	300	190	248	49	46	1821.68	0	1	0	5504.33		0	0	1978-08-01	1821.68	0	0	0	0	0			30
1	1978-08-03	260	195	248	49	46	1821.68	0	2	2	5504.33		0	0	1978-08-01	1821.68	0	0	0	0	0			30
1	1978-08-09	210	170	248	50	46	1860.23	0	2	8	5620.68		38.5529	2.11634	1978-08-01	1821.68	0	0	0	0	0			30
1	1978-08-13	190	165	248	50	46	1860.23	70	2	12	5620.68		38.5529	2.11634	1978-08-01	1821.68	0	0	0	10	60			30
1	1978-08-18	235	180	248	50	46	1860.23	100	2	17	5620.68		38.5529	2.11634	1978-08-01	1821.68	0	0	10	40	50			30
1	1978-08-23	215	190	248	50	46	1860.23	100	3	22	5620.68		38.5529	2.11634	1978-08-01	1821.68	0	0	10	40	50			30
1	1978-08-01	300	190	249	54	51	2225.37	0	1	0	6722.68		0	0	1978-08-01	2225.37	0	0	0	0	0			30
1	1978-08-03	260	195	249	55	52	2310.96	0	2	2	6980.97		85.5835	3.8458	1978-08-01	2225.37	0	0	0	0	0			30
1	1978-08-09	210	170	249	55	52	2310.96	20	2	8	6980.97		85.5835	3.8458	1978-08-01	2225.37	0	0	0	0	20			30
1	1978-08-13	190	165	249	55	52	2310.96	70	2	12	6980.97		85.5835	3.8458	1978-08-01	2225.37	0	0	0	0	70			30
1	1978-08-18	235	180	249	55	52	2310.96	70	3	17	6980.97		85.5835	3.8458	1978-08-01	2225.37	0	0	0	0	70			30
1	1978-08-01	300	190	250	55	57	2531.98	0	1	0	7648.02		0	0	1978-08-01	2531.98	0	0	0	0	0			30
1	1978-08-03	260	195	250	56	57	2577.39	0	2	2	7785.08		45.4158	1.79369	1978-08-01	2531.98	0	0	0	0	0			30
1	1978-08-09	210	170	250	56	59	2669.44	0	2	8	8062.87		137.458	5.42889	1978-08-01	2531.98	0	0	0	0	0			30
1	1978-08-13	190	165	250	56	59	2669.44	20	2	12	8062.87		137.458	5.42889	1978-08-01	2531.98	0	0	0	0	20			30
1	1978-08-18	235	180	250	56	59	2669.44	55	2	17	8062.87		137.458	5.42889	1978-08-01	2531.98	0	0	20	5	30			30
1	1978-08-23	215	190	250	56	59	2669.44	100	2	22	8062.87		137.458	5.42889	1978-08-01	2531.98	0	0	20	40	40			30
1	1978-08-25	240	180	250	56	59	2669.44	100	3	24	8062.87		137.458	5.42889	1978-08-01	2531.98	0	0	20	40	40			30
1	1978-08-01	300	190	251	33	28	751.076	0	1	0	2273.25		0	0	1978-08-01	751.076	0	0	0	0	0			30
1	1978-08-03	260	195	251	34	28	775.903	0	2	2	2348.18		24.8273	3.30556	1978-08-01	751.076	0	0	0	0	0			30
1	1978-08-09	210	170	251	34	29	801.134	0	2	8	2424.33		50.0583	6.66488	1978-08-01	751.076	0	0	0	0	0			30
1	1978-08-13	190	165	251	34	29	801.134	0	2	12	2424.33		50.0583	6.66488	1978-08-01	751.076	0	0	0	0	0			30
1	1978-08-18	235	180	251	34	29	801.134	0	2	17	2424.33		50.0583	6.66488	1978-08-01	751.076	0	0	0	0	0			30
1	1978-08-23	215	190	251	35	30	852.807	100	2	22	2580.28		101.731	13.5447	1978-08-01	751.076	0	0	0	0	100			30
1	1978-08-25	240	180	251	35	30	852.807	100	2	24	2580.28		101.731	13.5447	1978-08-01	751.076	0	0	70	0	30			30
1	1978-08-30	190	140	251	35	30	852.807	100	3	29	2580.28		101.731	13.5447	1978-08-01	751.076	0	0	70	0	30			30
1	1978-08-01	300	190	252	43	40	1390.53	0	1	0	4203.12		0	0	1978-08-01	1390.53	0	0	0	0	0			30
1	1978-08-03	260	195	252	46	42	1563.11	0	2	2	4723.97		172.58	12.4111	1978-08-01	1390.53	0	0	0	0	0			30
1	1978-08-09	210	170	252	46	42	1563.11	10	2	8	4723.97		172.58	12.4111	1978-08-01	1390.53	0	0	0	0	10			30
1	1978-08-13	190	165	252	46	42	1563.11	20	2	12	4723.97		172.58	12.4111	1978-08-01	1390.53	0	0	0	0	20			30
1	1978-08-18	235	180	252	46	42	1563.11	35	2	17	4723.97		172.58	12.4111	1978-08-01	1390.53	0	0	0	5	30			30
1	1978-08-23	215	190	252	46	42	1563.11	100	2	22	4723.97		172.58	12.4111	1978-08-01	1390.53	0	0	0	30	70			30
1	1978-08-25	240	180	252	46	42	1563.11	100	3	24	4723.97		172.58	12.4111	1978-08-01	1390.53	0	0	0	30	70			30
1	1978-08-01	300	190	253	58	52	2442.36	5	1	0	7377.54		0	0	1978-08-01	2442.36	5	0	0	0	0			30
1	1978-08-03	260	195	253	58	53	2486.97	5	2	2	7512.17		44.6084	1.82645	1978-08-01	2442.36	5	0	0	0	0			30
1	1978-08-09	210	170	253	60	53	2577.39	5	2	8	7785.08		135.036	5.52893	1978-08-01	2442.36	5	0	0	0	0			30
1	1978-08-13	190	165	253	60	53	2577.39	10	2	12	7785.08		135.036	5.52893	1978-08-01	2442.36	5	0	0	5	0			30
1	1978-08-18	235	180	253	60	53	2577.39	100	2	17	7785.08		135.036	5.52893	1978-08-01	2442.36	5	0	0	20	75			30
1	1978-08-23	215	190	253	60	53	2577.39	100	2	22	7785.08		135.036	5.52893	1978-08-01	2442.36	0	0	20	40	40			30
1	1978-08-25	240	180	253	60	53	2577.39	100	3	24	7785.08		135.036	5.52893	1978-08-01	2442.36	0	0	20	40	40			30
1	1978-08-01	300	190	254	59	50	2398.15	0	1	0	7244.13		0	0	1978-08-01	2398.15	0	0	0	0	0			30
1	1978-08-03	260	195	254	60	51	2486.97	0	2	2	7512.17		88.813	3.70339	1978-08-01	2398.15	0	0	0	0	0			30
1	1978-08-09	210	170	254	61	51	2531.98	0	2	8	7648.02		133.825	5.58034	1978-08-01	2398.15	0	0	0	0	0			30
1	1978-08-13	190	165	254	62	51	2577.39	0	2	12	7785.08		179.241	7.47412	1978-08-01	2398.15	0	0	0	0	0			30
1	1978-08-18	235	180	254	62	51	2577.39	30	2	17	7785.08		179.241	7.47412	1978-08-01	2398.15	0	0	0	20	10			30
1	1978-08-23	215	190	254	62	51	2577.39	100	2	22	7785.08		179.241	7.47412	1978-08-01	2398.15	0	0	0	45	55			30
1	1978-08-25	240	180	254	62	51	2577.39	100	3	24	7785.08		179.241	7.47412	1978-08-01	2398.15	0	0	0	45	55			30
1	1978-08-01	300	190	255	47	45	1708.44	0	1	0	5162.58		0	0	1978-08-01	1708.44	0	0	0	0	0			30
1	1978-08-03	260	195	255	48	45	1745.78	0	2	2	5275.27		37.3418	2.18573	1978-08-01	1708.44	0	0	0	0	0			30
1	1978-08-09	210	170	255	48	47	1821.68	0	2	8	5504.33		113.237	6.62807	1978-08-01	1708.44	0	0	0	0	0			30
1	1978-08-13	190	165	255	48	47	1821.68	10	2	12	5504.33		113.237	6.62807	1978-08-01	1708.44	0	0	0	0	10			30
1	1978-08-18	235	180	255	48	47	1821.68	100	2	17	5504.33		113.237	6.62807	1978-08-01	1708.44	0	0	0	0	100			30
1	1978-08-23	215	190	255	48	47	1821.68	100	2	22	5504.33		113.237	6.62807	1978-08-01	1708.44	0	0	50	0	50			30
1	1978-08-25	240	180	255	48	47	1821.68	100	3	24	5504.33		113.237	6.62807	1978-08-01	1708.44	0	0	50	0	50			31
1	1978-08-01	300	190	256	41	35	1165.87	0	1	0	3525.11		0	0	1978-08-01	1165.87	0	0	0	0	0			31
1	1978-08-03	260	195	256	41	36	1196.76	0	2	2	3618.31		30.8827	2.64889	1978-08-01	1165.87	0	0	0	0	0			31
1	1978-08-09	210	170	256	44	38	1357.22	0	2	8	4102.61		191.352	16.4127	1978-08-01	1165.87	0	0	0	0	0			31
1	1978-08-13	190	165	256	45	39	1424.24	0	2	12	4304.86		258.365	22.1607	1978-08-01	1165.87	0	0	0	0	0			31
1	1978-08-18	235	180	256	45	39	1424.24	0	2	17	4304.86		258.365	22.1607	1978-08-01	1165.87	0	0	0	0	0			31
1	1978-08-23	215	190	256	46	41	1527.79	45	2	22	4617.36		361.913	31.0422	1978-08-01	1165.87	0	0	0	15	30			31
1	1978-08-25	240	180	256	46	41	1527.79	45	3	24	4617.36		361.913	31.0422	1978-08-01	1165.87	0	0	0	15	30			31
1	1978-08-01	300	190	257	42	36	1228.04	0	1	0	3712.74		0	0	1978-08-01	1228.04	0	0	0	0	0			31
1	1978-08-03	260	195	257	43	36	1259.73	0	2	2	3808.38		31.6901	2.58054	1978-08-01	1228.04	0	0	0	0	0			31
1	1978-08-09	210	170	257	44	39	1390.53	0	2	8	4203.12		162.487	13.2314	1978-08-01	1228.04	0	0	0	0	0			31
1	1978-08-13	190	165	257	45	40	1458.35	0	2	12	4407.81		230.308	18.7541	1978-08-01	1228.04	0	0	0	0	0			31
1	1978-08-18	235	180	257	46	40	1492.87	100	2	17	4511.98		264.824	21.5648	1978-08-01	1228.04	0	0	0	20	80			31
1	1978-08-23	215	190	257	46	40	1492.87	100	2	22	4511.98		264.824	21.5648	1978-08-01	1228.04	0	0	5	30	65			31
1	1978-08-25	240	180	257	46	40	1492.87	100	3	24	4511.98		264.824	21.5648	1978-08-01	1228.04	0	0	5	30	65			31
1	1978-08-01	300	190	258	27	21	465.057	0	1	0	1410.05		0	0	1978-08-01	465.057	0	0	0	0	0			31
1	1978-08-03	260	195	258	29	22	525.006	0	2	2	1590.97		59.9488	12.8906	1978-08-01	465.057	0	0	0	0	0			31
1	1978-08-09	210	170	258	29	22	525.006	0	2	8	1590.97		59.9488	12.8906	1978-08-01	465.057	0	0	0	0	0			31
1	1978-08-13	190	165	258	29	23	545.796	1	2	12	1653.72		80.7391	17.3611	1978-08-01	465.057	0	0	0	1	0			31
1	1978-08-18	235	180	258	30	25	610.59	100	2	17	1849.27		145.532	31.2934	1978-08-01	465.057	0	0	0	70	30			31
1	1978-08-23	215	190	258	30	25	610.59	100	3	22	1849.27		145.532	31.2934	1978-08-01	465.057	0	0	0	70	30			31
1	1978-08-01	300	190	259	41	47	1563.11	0	1	0	4723.97		0	0	1978-08-01	1563.11	0	0	0	0	0			31
1	1978-08-03	260	195	259	43	49	1708.44	0	2	2	5162.58		145.33	9.29752	1978-08-01	1563.11	0	0	0	0	0			31
1	1978-08-09	210	170	259	44	49	1745.78	0	2	8	5275.27		182.672	11.6865	1978-08-01	1563.11	0	0	0	0	0			31
1	1978-08-13	190	165	259	44	49	1745.78	0	3	12	5275.27		182.672	11.6865	1978-08-01	1563.11	0	0	0	0	0			31
1	1978-08-01	300	190	260	57	48	2225.37	5	1	0	6722.68		0	0	1978-08-01	2225.37	5	0	0	0	0			31
1	1978-08-03	260	195	260	57	48	2225.37	5	2	2	6722.68		0	0	1978-08-01	2225.37	5	0	0	0	0			31
1	1978-08-09	210	170	260	59	50	2398.15	5	2	8	7244.13		172.782	7.76417	1978-08-01	2225.37	5	0	0	0	0			31
1	1978-08-13	190	165	260	60	50	2442.36	100	2	12	7377.54		216.986	9.75057	1978-08-01	2225.37	5	0	0	0	95			31
1	1978-08-18	235	180	260	60	50	2442.36	100	2	17	7377.54		216.986	9.75057	1978-08-01	2225.37	5	0	0	5	90			31
1	1978-08-23	215	190	260	60	50	2442.36	100	2	22	7377.54		216.986	9.75057	1978-08-01	2225.37	5	0	0	40	55			31
1	1978-08-25	240	180	260	60	50	2442.36	100	3	24	7377.54		216.986	9.75057	1978-08-01	2225.37	5	0	0	40	55			31
1	1978-08-01	300	190	261	61	54	2669.44	0	1	0	8062.87		0	0	1978-08-01	2669.44	0	0	0	0	0			31
1	1978-08-03	260	195	261	63	54	2763.09	0	2	2	8345.53		93.6574	3.50851	1978-08-01	2669.44	0	0	0	0	0			31
1	1978-08-09	210	170	261	65	54	2858.37	0	2	8	8633.06		188.93	7.0775	1978-08-01	2669.44	0	0	0	0	0			31
1	1978-08-13	190	165	261	65	54	2858.37	0	2	12	8633.06		188.93	7.0775	1978-08-01	2669.44	0	0	0	0	0			31
1	1978-08-18	235	180	261	65	54	2858.37	5	2	17	8633.06		188.93	7.0775	1978-08-01	2669.44	0	0	0	5	0			31
1	1978-08-23	215	190	261	65	54	2858.37	50	2	22	8633.06		188.93	7.0775	1978-08-01	2669.44	0	0	0	40	10			31
1	1978-08-25	240	180	261	65	54	2858.37	50	3	24	8633.06		188.93	7.0775	1978-08-01	2669.44	0	0	0	40	10			31
1	1978-08-01	300	190	262	62	54	2716.06	0	1	0	8203.59		0	0	1978-08-01	2716.06	0	0	0	0	0			31
1	1978-08-03	260	195	262	63	54	2763.09	0	2	2	8345.53		47.0305	1.73157	1978-08-01	2716.06	0	0	0	0	0			31
1	1978-08-09	210	170	262	64	56	2906.61	0	2	8	8778.65		190.544	7.01546	1978-08-01	2716.06	0	0	0	0	0			31
1	1978-08-13	190	165	262	65	56	2955.25	0	2	12	8925.46		239.19	8.80648	1978-08-01	2716.06	0	0	0	0	0			31
1	1978-08-18	235	180	262	65	56	2955.25	0	2	17	8925.46		239.19	8.80648	1978-08-01	2716.06	0	0	0	0	0			31
1	1978-08-23	215	190	262	65	56	2955.25	5	2	22	8925.46		239.19	8.80648	1978-08-01	2716.06	0	0	0	5	0			31
1	1978-08-25	240	180	262	66	56	3004.3	100	2	24	9073.49		288.239	10.6124	1978-08-01	2716.06	0	0	0	20	80			31
1	1978-08-30	190	140	262	66	56	3004.3	100	3	29	9073.49		288.239	10.6124	1978-08-01	2716.06	0	0	0	20	80			31
1	1978-08-01	300	190	263	54	44	1938.55	0	1	0	5857.04		0	0	1978-08-01	1938.55	0	0	0	0	0			31
1	1978-08-03	260	195	263	55	44	1978.31	0	2	2	5977.05		39.764	2.05123	1978-08-01	1938.55	0	0	0	0	0			31
1	1978-08-09	210	170	263	55	46	2059.05	0	2	8	6220.72		120.503	6.21616	1978-08-01	1938.55	0	0	0	0	0			31
1	1978-08-13	190	165	263	56	46	2100.02	0	2	12	6344.38		161.478	8.32986	1978-08-01	1938.55	0	0	0	0	0			31
1	1978-08-18	235	180	263	56	46	2100.02	0	2	17	6344.38		161.478	8.32986	1978-08-01	1938.55	0	0	0	0	0			31
1	1978-08-23	215	190	263	56	46	2100.02	100	2	22	6344.38		161.478	8.32986	1978-08-01	1938.55	0	0	0	0	100			31
1	1978-08-25	240	180	263	56	46	2100.02	100	3	24	6344.38		161.478	8.32986	1978-08-01	1938.55	0	0	0	0	100			31
1	1978-08-01	300	190	264	57	48	2225.37	0	1	0	6722.68		0	0	1978-08-01	2225.37	0	0	0	0	0			31
1	1978-08-03	260	195	264	57	48	2225.37	0	2	2	6722.68		0	0	1978-08-01	2225.37	0	0	0	0	0			31
1	1978-08-09	210	170	264	60	50	2442.36	0	2	8	7377.54		216.986	9.75057	1978-08-01	2225.37	0	0	0	0	0			31
1	1978-08-13	190	165	264	60	50	2442.36	0	2	12	7377.54		216.986	9.75057	1978-08-01	2225.37	0	0	0	0	0			31
1	1978-08-18	235	180	264	60	50	2442.36	0	3	17	7377.54		216.986	9.75057	1978-08-01	2225.37	0	0	0	0	0			31
1	1978-08-01	300	190	265	58	51	2398.15	0	1	0	7244.13		0	0	1978-08-01	2398.15	0	0	0	0	0			31
1	1978-08-03	260	195	265	58	52	2442.36	0	2	2	7377.54		44.2047	1.84328	1978-08-01	2398.15	0	0	0	0	0			31
1	1978-08-09	210	170	265	60	52	2531.98	100	2	8	7648.02		133.825	5.58034	1978-08-01	2398.15	0	0	0	5	95			32
1	1978-08-13	190	165	265	60	52	2531.98	100	2	12	7648.02		133.825	5.58034	1978-08-01	2398.15	0	0	30	10	60			32
1	1978-08-18	235	180	265	60	52	2531.98	100	3	17	7648.02		133.825	5.58034	1978-08-01	2398.15	0	0	30	10	60			32
1	1978-08-01	300	190	266	65	56	2955.25	0	1	0	8925.46		0	0	1978-08-01	2955.25	0	0	0	0	0			32
1	1978-08-03	260	195	266	66	57	3053.76	0	2	2	9222.74		98.5017	3.33311	1978-08-01	2955.25	0	0	0	0	0			32
1	1978-08-09	210	170	266	67	57	3103.61	0	2	8	9373.21		148.358	5.02015	1978-08-01	2955.25	0	0	0	0	0			32
1	1978-08-13	190	165	266	67	57	3103.61	0	2	12	9373.21		148.358	5.02015	1978-08-01	2955.25	0	0	0	0	0			32
1	1978-08-18	235	180	266	68	57	3153.87	100	2	17	9524.89		198.618	6.72085	1978-08-01	2955.25	0	0	0	0	100			32
1	1978-08-23	215	190	266	68	58	3204.54	100	2	22	9677.79		249.282	8.43522	1978-08-01	2955.25	0	0	60	0	40			32
1	1978-08-25	240	180	266	68	58	3204.54	100	3	24	9677.79		249.282	8.43522	1978-08-01	2955.25	0	0	60	0	40			32
1	1978-08-01	300	190	267	38	38	1165.87	0	1	0	3525.11		0	0	1978-08-01	1165.87	0	0	0	0	0			32
1	1978-08-03	260	195	267	39	39	1228.04	0	2	2	3712.74		62.1691	5.33241	1978-08-01	1165.87	0	0	0	0	0			32
1	1978-08-09	210	170	267	39	39	1228.04	10	2	8	3712.74		62.1691	5.33241	1978-08-01	1165.87	0	0	0	10	0			32
1	1978-08-13	190	165	267	39	39	1228.04	75	2	12	3712.74		62.1691	5.33241	1978-08-01	1165.87	0	0	0	25	50			32
1	1978-08-18	235	180	267	39	39	1228.04	100	2	17	3712.74		62.1691	5.33241	1978-08-01	1165.87	0	0	20	30	50			32
1	1978-08-23	215	190	267	39	39	1228.04	100	2	22	3712.74		62.1691	5.33241	1978-08-01	1165.87	0	0	10	50	40			32
1	1978-08-25	240	180	267	39	39	1228.04	100	3	24	3712.74		62.1691	5.33241	1978-08-01	1165.87	0	0	10	50	40			32
1	1978-08-03	260	195	268	46	41	1527.79	0	1	0	4617.36		0	0	1978-08-03	1527.79	0	0	0	0	0			32
1	1978-08-09	210	170	268	54	47	2059.05	0	2	6	6220.72		531.263	34.7734	1978-08-03	1527.79	0	0	0	0	0			32
1	1978-08-13	190	165	268	55	48	2141.4	0	2	10	6469.26		613.617	40.1638	1978-08-03	1527.79	0	0	0	0	0			32
1	1978-08-18	235	180	268	56	48	2183.19	1	2	15	6595.36		655.4	42.8987	1978-08-03	1527.79	0	0	0	1	0			32
1	1978-08-23	215	190	268	56	48	2183.19	35	2	20	6595.36		655.4	42.8987	1978-08-03	1527.79	0	0	0	15	20			32
1	1978-08-25	240	180	268	56	48	2183.19	100	2	22	6595.36		655.4	42.8987	1978-08-03	1527.79	0	0	0	25	75			32
1	1978-08-30	190	140	268	56	48	2183.19	100	3	27	6595.36		655.4	42.8987	1978-08-03	1527.79	0	0	0	25	75			32
1	1978-08-03	260	195	269	55	48	2141.4	0	1	0	6469.26		0	0	1978-08-03	2141.4	0	0	0	0	0			32
1	1978-08-09	210	170	269	58	50	2354.35	0	2	6	7111.94		212.949	9.94439	1978-08-03	2141.4	0	0	0	0	0			32
1	1978-08-13	190	165	269	59	51	2442.36	0	2	10	7377.54		300.955	14.0541	1978-08-03	2141.4	0	0	0	0	0			32
1	1978-08-18	235	180	269	60	51	2486.97	10	2	15	7512.17		345.563	16.1372	1978-08-03	2141.4	0	0	0	10	0			32
1	1978-08-23	215	190	269	60	51	2486.97	100	2	20	7512.17		345.563	16.1372	1978-08-03	2141.4	0	0	0	50	50			32
1	1978-08-25	240	180	269	60	51	2486.97	100	3	22	7512.17		345.563	16.1372	1978-08-03	2141.4	0	0	0	50	50			32
1	1978-08-03	260	195	270	34	31	852.807	0	1	0	2580.28		0	0	1978-08-03	852.807	0	0	0	0	0			32
1	1978-08-09	210	170	270	34	32	879.249	1	2	6	2660.08		26.4421	3.10059	1978-08-03	852.807	1	0	0	0	0			32
1	1978-08-13	190	165	270	34	32	879.249	100	2	10	2660.08		26.4421	3.10059	1978-08-03	852.807	1	0	0	10	89			32
1	1978-08-18	235	180	270	34	32	879.249	100	3	15	2660.08		26.4421	3.10059	1978-08-03	852.807	1	0	0	10	89			32
1	1978-08-03	260	195	271	51	47	1938.55	0	1	0	5857.04		0	0	1978-08-03	1938.55	0	0	0	0	0			32
1	1978-08-09	210	170	271	51	47	1938.55	0	2	6	5857.04		0	0	1978-08-03	1938.55	0	0	0	0	0			32
1	1978-08-13	190	165	271	51	47	1938.55	11	2	10	5857.04		0	0	1978-08-03	1938.55	0	0	0	1	10			32
1	1978-08-18	235	180	271	51	47	1938.55	35	2	15	5857.04		0	0	1978-08-03	1938.55	0	0	0	15	20			32
1	1978-08-23	215	190	271	51	47	1938.55	100	2	20	5857.04		0	0	1978-08-03	1938.55	0	0	30	45	25			32
1	1978-08-25	240	180	271	51	47	1938.55	100	3	22	5857.04		0	0	1978-08-03	1938.55	0	0	30	45	25			32
1	1978-08-03	260	195	272	49	32	1324.32	0	1	0	4003.31		0	0	1978-08-03	1324.32	0	0	0	0	0			32
1	1978-08-09	210	170	272	49	44	1745.78	0	2	6	5275.27		421.458	31.8244	1978-08-03	1324.32	0	0	0	0	0			32
1	1978-08-13	190	165	272	49	44	1745.78	0	2	10	5275.27		421.458	31.8244	1978-08-03	1324.32	0	0	0	0	0			32
1	1978-08-18	235	180	272	49	44	1745.78	0	3	15	5275.27		421.458	31.8244	1978-08-03	1324.32	0	0	0	0	0			32
1	1978-08-03	260	195	273	32	28	726.652	0	1	0	2199.54		0	0	1978-08-03	726.652	0	0	0	0	0			32
1	1978-08-09	210	170	273	33	28	751.076	30	2	6	2273.25		24.4236	3.36111	1978-08-03	726.652	0	0	0	0	30			32
1	1978-08-13	190	165	273	33	28	751.076	100	2	10	2273.25		24.4236	3.36111	1978-08-03	726.652	0	0	20	0	80			32
1	1978-08-18	235	180	273	33	28	751.076	100	3	15	2273.25		24.4236	3.36111	1978-08-03	726.652	0	0	20	0	80			32
1	1978-08-03	260	195	274	67	59	3204.54	5	1	0	9677.79		0	0	1978-08-03	3204.54	5	0	0	0	0			32
1	1978-08-09	210	170	274	68	60	3307.07	5	2	6	9987.26		102.539	3.1998	1978-08-03	3204.54	5	0	0	0	0			32
1	1978-08-13	190	165	274	69	60	3358.95	5	2	10	10143.8		154.414	4.81859	1978-08-03	3204.54	5	0	0	0	0			32
1	1978-08-18	235	180	274	69	60	3358.95	100	2	15	10143.8		154.414	4.81859	1978-08-03	3204.54	5	0	70	0	25			32
1	1978-08-23	215	190	274	69	60	3358.95	100	3	20	10143.8		154.414	4.81859	1978-08-03	3204.54	5	0	70	0	25			32
1	1978-08-03	260	195	275	62	56	2810.53	5	1	0	8488.68		0	0	1978-08-03	2810.53	5	0	0	0	0			32
1	1978-08-09	210	170	275	64	57	2955.25	5	2	6	8925.46		144.725	5.14938	1978-08-03	2810.53	5	0	0	0	0			32
1	1978-08-13	190	165	275	65	58	3053.76	5	2	10	9222.74		243.227	8.65412	1978-08-03	2810.53	5	0	0	0	0			32
1	1978-08-18	235	180	275	65	58	3053.76	45	2	15	9222.74		243.227	8.65412	1978-08-03	2810.53	5	0	0	20	20			32
1	1978-08-23	215	190	275	65	58	3053.76	100	2	20	9222.74		243.227	8.65412	1978-08-03	2810.53	0	0	20	50	30			32
1	1978-08-25	240	180	275	65	58	3053.76	100	3	22	9222.74		243.227	8.65412	1978-08-03	2810.53	0	0	20	50	30			32
1	1978-08-03	260	195	276	42	40	1357.22	0	1	0	4102.61		0	0	1978-08-03	1357.22	0	0	0	0	0			32
1	1978-08-09	210	170	276	43	41	1424.24	0	2	6	4304.86		67.0135	4.93754	1978-08-03	1357.22	0	0	0	0	0			32
1	1978-08-13	190	165	276	43	41	1424.24	0	2	10	4304.86		67.0135	4.93754	1978-08-03	1357.22	0	0	0	0	0			33
1	1978-08-18	235	180	276	43	41	1424.24	25	2	15	4304.86		67.0135	4.93754	1978-08-03	1357.22	0	0	0	5	20			33
1	1978-08-23	215	190	276	43	41	1424.24	100	2	20	4304.86		67.0135	4.93754	1978-08-03	1357.22	0	0	10	25	65			33
1	1978-08-25	240	180	276	43	41	1424.24	100	3	22	4304.86		67.0135	4.93754	1978-08-03	1357.22	0	0	10	25	65			33
1	1978-08-03	260	195	277	48	44	1708.44	0	1	0	5162.58		0	0	1978-08-03	1708.44	0	0	0	0	0			33
1	1978-08-09	210	170	277	51	45	1860.23	0	2	6	5620.68		151.79	8.88469	1978-08-03	1708.44	0	0	0	0	0			33
1	1978-08-13	190	165	277	51	45	1860.23	5	2	10	5620.68		151.79	8.88469	1978-08-03	1708.44	0	0	0	5	0			33
1	1978-08-18	235	180	277	51	45	1860.23	100	2	15	5620.68		151.79	8.88469	1978-08-03	1708.44	0	0	0	50	50			33
1	1978-08-23	215	190	277	51	45	1860.23	100	3	20	5620.68		151.79	8.88469	1978-08-03	1708.44	0	0	0	50	50			33
1	1978-08-03	260	195	278	51	45	1860.23	0	1	0	5620.68		0	0	1978-08-03	1860.23	0	0	0	0	0			33
1	1978-08-09	210	170	278	58	45	2141.4	0	2	6	6469.26		281.174	15.115	1978-08-03	1860.23	0	0	0	0	0			33
1	1978-08-13	190	165	278	59	46	2225.37	5	2	10	6722.68		365.143	19.6289	1978-08-03	1860.23	0	0	0	5	0			33
1	1978-08-18	235	180	278	59	46	2225.37	20	2	15	6722.68		365.143	19.6289	1978-08-03	1860.23	0	0	0	20	0			33
1	1978-08-23	215	190	278	59	46	2225.37	20	2	20	6722.68		365.143	19.6289	1978-08-03	1860.23	0	0	0	20	0			33
1	1978-08-25	240	180	278	59	46	2225.37	95	2	22	6722.68		365.143	19.6289	1978-08-03	1860.23	0	0	0	25	70			33
1	1978-08-30	190	140	278	59	46	2225.37	100	2	27	6722.68		365.143	19.6289	1978-08-03	1860.23	0	0	20	40	40			33
1	1978-09-01	180	130	278	59	46	2225.37	100	3	29	6722.68		365.143	19.6289	1978-08-03	1860.23	0	0	20	40	40			33
1	1978-08-03	260	195	279	58	53	2486.97	0	1	0	7512.17		0	0	1978-08-03	2486.97	0	0	0	0	0			33
1	1978-08-09	210	170	279	59	54	2577.39	0	2	6	7785.08		90.4278	3.63607	1978-08-03	2486.97	0	0	0	0	0			33
1	1978-08-13	190	165	279	60	56	2716.06	0	2	10	8203.59		229.097	9.21191	1978-08-03	2486.97	0	0	0	0	0			33
1	1978-08-18	235	180	279	60	56	2716.06	1	2	15	8203.59		229.097	9.21191	1978-08-03	2486.97	0	0	0	1	0			33
1	1978-08-23	215	190	279	60	56	2716.06	35	2	20	8203.59		229.097	9.21191	1978-08-03	2486.97	0	0	0	15	20			33
1	1978-08-25	240	180	279	61	56	2763.09	100	2	22	8345.53		276.128	11.103	1978-08-03	2486.97	0	0	0	25	75			33
1	1978-08-30	190	140	279	61	56	2763.09	100	2	27	8345.53		276.128	11.103	1978-08-03	2486.97	0	0	20	55	25			33
1	1978-09-01	180	130	279	61	56	2763.09	100	3	29	8345.53		276.128	11.103	1978-08-03	2486.97	0	0	20	55	25			33
1	1978-08-03	260	195	280	50	47	1899.19	0	1	0	5738.25		0	0	1978-08-03	1899.19	0	0	0	0	0			33
1	1978-08-09	210	170	280	53	48	2059.05	0	2	6	6220.72		159.863	8.41747	1978-08-03	1899.19	0	0	0	0	0			33
1	1978-08-13	190	165	280	54	48	2100.02	0	2	10	6344.38		200.839	10.575	1978-08-03	1899.19	0	0	0	0	0			33
1	1978-08-18	235	180	280	54	48	2100.02	75	2	15	6344.38		200.839	10.575	1978-08-03	1899.19	0	0	0	5	70			33
1	1978-08-23	215	190	280	54	48	2100.02	100	2	20	6344.38		200.839	10.575	1978-08-03	1899.19	0	0	10	30	60			33
1	1978-08-25	240	180	280	54	48	2100.02	100	3	22	6344.38		200.839	10.575	1978-08-03	1899.19	0	0	10	30	60			33
1	1978-08-03	260	195	281	39	31	989.054	0	1	0	2991.47		0	0	1978-08-03	989.054	0	0	0	0	0			33
1	1978-08-09	210	170	281	41	32	1075.65	0	2	6	3252.81		86.5927	8.7551	1978-08-03	989.054	0	0	0	0	0			33
1	1978-08-13	190	165	281	41	33	1105.32	0	2	10	3342.36		116.264	11.7551	1978-08-03	989.054	0	0	0	0	0			33
1	1978-08-18	235	180	281	41	34	1135.39	5	2	15	3433.12		146.34	14.7959	1978-08-03	989.054	0	0	0	5	0			33
1	1978-08-23	215	190	281	41	34	1135.39	15	2	20	3433.12		146.34	14.7959	1978-08-03	989.054	0	0	0	15	0			33
1	1978-08-25	240	180	281	42	34	1165.87	75	2	22	3525.11		176.819	17.8776	1978-08-03	989.054	0	0	0	30	45			33
1	1978-08-30	190	140	281	42	34	1165.87	100	2	27	3525.11		176.819	17.8776	1978-08-03	989.054	0	0	10	45	45			33
1	1978-09-01	180	130	281	42	34	1165.87	100	3	29	3525.11		176.819	17.8776	1978-08-03	989.054	0	0	10	45	45			33
1	1978-08-03	260	195	282	60	53	2577.39	0	1	0	7785.08		0	0	1978-08-03	2577.39	0	0	0	0	0			33
1	1978-08-09	210	170	282	64	55	2858.37	0	2	6	8633.06		280.972	10.9014	1978-08-03	2577.39	0	0	0	0	0			33
1	1978-08-13	190	165	282	65	55	2906.61	0	2	10	8778.65		329.214	12.7731	1978-08-03	2577.39	0	0	0	0	0			33
1	1978-08-18	235	180	282	65	55	2906.61	50	2	15	8778.65		329.214	12.7731	1978-08-03	2577.39	0	0	0	10	40			33
1	1978-08-23	215	190	282	65	56	2955.25	85	2	20	8925.46		377.859	14.6605	1978-08-03	2577.39	0	0	0	25	60			33
1	1978-08-25	240	180	282	65	56	2955.25	85	3	22	8925.46		377.859	14.6605	1978-08-03	2577.39	0	0	0	25	60			33
1	1978-08-03	260	195	283	51	45	1860.23	0	1	0	5620.68		0	0	1978-08-03	1860.23	0	0	0	0	0			33
[truncated: 1,985 more rows]

## Sheet: Description
CT2 1978
A	leaf type: 1=normal, 2=from flower stem
B	date
C	maximum temperature
D	minimum temperature
E	leaf number
F	length
G	width
H	surface; H = 1.028*3.1416*((F+G)/4)*((F+G)/4)
I	% total damage; I = R+S+T+U+V
J	status: 1=first observation and first occurrence, 2=next observation, 3=last observation; J = IF(E(x)=E(x+1),(IF(AND(E(x)<>E(x-1),B(x)<>28636.5), 1,2)),3)
K	age; K = B-P
L	potential biomass / month; L = (3.018+H)+6.506
M	potential biomass - overall; TODO???
N	absolute growth since day of first occurrence; N = H-Q
O	relative growth since day of first occurrence; O = (H-Q)/Q*100
P	date of first occurrence / creation date; P = IF(E(x)=E(x-1),P(x-1),B(x))
Q	begin surface; Q = IF(E(x)=E(x-1),Q(x-1),H(x))
R	% damage Cataclysta
S	% damage snails
T	% danage microbial decay
U	% damage Septoria villarsiae Desm.
V	% damage autolysis
W	% damage ??? (always = 0, not used?)
X
Y
Z
Leaf type	Date	Max temp	Min temp	Leaf #	Length	Width	Surface	Tot % dam	Status	Age	Pot Biom/m	Pot Biom/a	Abs grow	Rel grow	Crea date	Begin surf	Cataclysta %	Rem dam %	Micr dec %	Septoria %	Autolysis %	Schade %
