# Supplementary material for: Initial decomposition of floating leaf blades of Nymphoides peltata (S.G. Gmel.) O. Kuntze (Menyanthaceae): causes, impact and succession
Source: PeerJ. 2023 Dec 21;11:e16689. doi: 10.7717/peerj.16689 (PMC10749093; doi:10.7717/peerj.16689)
Supplement: Supplemental Information 3 [file peerj-11-16689-s003.xlsx]

## Sheet: Basic data
Basic data: Nymphoides peltata, Bemmelse Strang 1, 1980
L type	Date	Max temp	Min temp	Leaf #	Length	Width	Surface	Tot dam %	Status	Age	Pot Biom/m	Pot Biom/a	Abs grow	Rel grow	Crea date	Begin surf	Cricotopus	Elophila	snails	Fulica cons	Fulica beak	Septoria	yellow	decayed	sum fauna
1	1980-05-19	200	170	1	27	30	655.804	20	1	0	2355.47	1985.72	0	0	1980-05-19	655.804	20	0	0	0	0	0	0	0	20	1
1	1980-05-22	210	160	1	27	30	655.804	20	2	3	2355.47	1985.72	0	0	1980-05-19	655.804	20	0	0	0	0	0	0	0	20	1
1	1980-05-27	190	140	1	27	30	655.804	20	3	8	2355.47	1985.72	0	0	1980-05-19	655.804	20	0	0	0	0	0	0	0	20	1
1	1980-05-19	200	170	2	58	52	2442.36	0	1	0	8831.73	7377.54	0	0	1980-05-19	2442.36	0	0	0	0	0	0	0	0	0	1
1	1980-05-22	210	160	2	64	60	3103.61	0	2	3	11228.8	9373.21	661.253	27.0744	1980-05-19	2442.36	0	0	0	0	0	0	0	0	0	1
1	1980-05-27	190	140	2	65	60	3153.87	0	2	8	11411	9524.89	711.513	29.1322	1980-05-19	2442.36	0	0	0	0	0	0	0	0	0	1
1	1980-05-29	200	160	2	68	61	3358.95	0	2	10	12154.4	10143.8	916.591	37.5289	1980-05-19	2442.36	0	0	0	0	0	0	0	0	0	1
1	1980-06-02	200	150	2	69	63	3517	15	2	14	12727.3	10620.8	1074.64	44	1980-05-19	2442.36	5	0	0	0	0	0	10	0	5	1
1	1980-06-05	190	150	2	70	63	3570.49	17	2	17	12921.2	10782.2	1128.13	46.1901	1980-05-19	2442.36	5	0	0	0	0	0	10	2	5	1
1	1980-06-09	270	180	2	70	63	3570.49	95	2	21	12921.2	10782.2	1128.13	46.1901	1980-05-19	2442.36	5	0	0	0	0	0	40	50	5	1
1	1980-06-12	220	190	2	70	63	3570.49	100	2	24	12921.2	10782.2	1128.13	46.1901	1980-05-19	2442.36	5	0	0	0	0	0	0	95	5	1
1	1980-06-16	250	190	2	70	63	3570.49	100	3	28	12921.2	10782.2	1128.13	46.1901	1980-05-19	2442.36	5	0	0	0	0	0	0	95	5	1
1	1980-05-19	200	170	3	41	40	1324.32	0	1	0	4778.86	4003.31	0	0	1980-05-19	1324.32	0	0	0	0	0	0	0	0	0	1
1	1980-05-22	210	160	3	42	42	1424.24	0	2	3	5141.05	4304.86	99.9147	7.54458	1980-05-19	1324.32	0	0	0	0	0	0	0	0	0	1
1	1980-05-27	190	140	3	44	42	1492.87	0	2	8	5389.83	4511.98	168.543	12.7267	1980-05-19	1324.32	0	0	0	0	0	0	0	0	0	1
1	1980-05-29	200	160	3	44	42	1492.87	0	2	10	5389.83	4511.98	168.543	12.7267	1980-05-19	1324.32	0	0	0	0	0	0	0	0	0	1
1	1980-06-02	200	150	3	45	44	1598.84	0	2	14	5773.97	4831.79	274.513	20.7285	1980-05-19	1324.32	0	0	0	0	0	0	0	0	0	1
1	1980-06-05	190	150	3	45	44	1598.84	2	2	17	5773.97	4831.79	274.513	20.7285	1980-05-19	1324.32	2	0	0	0	0	0	0	0	2	1
1	1980-06-09	270	180	3	45	44	1598.84	100	2	21	5773.97	4831.79	274.513	20.7285	1980-05-19	1324.32	20	0	0	0	0	0	10	70	20	1
1	1980-06-12	220	190	3	45	44	1598.84	100	3	24	5773.97	4831.79	274.513	20.7285	1980-05-19	1324.32	20	0	0	0	0	0	10	70	20	1
1	1980-05-19	200	170	4	44	41	1458.35	0	1	0	5264.71	4407.81	0	0	1980-05-19	1458.35	0	0	0	0	0	0	0	0	0	1
1	1980-05-22	210	160	4	44	41	1458.35	0	3	3	5264.71	4407.81	0	0	1980-05-19	1458.35	0	0	0	0	0	0	0	0	0	1
1	1980-05-19	200	170	5	38	37	1135.39	85	1	0	4093.99	3433.12	0	0	1980-05-19	1135.39	85	0	0	0	0	0	0	0	85	1
1	1980-05-22	210	160	5	38	37	1135.39	85	3	3	4093.99	3433.12	0	0	1980-05-19	1135.39	85	0	0	0	0	0	0	0	85	1
1	1980-05-19	200	170	6	49	41	1634.97	0	1	0	5904.94	4940.84	0	0	1980-05-19	1634.97	0	0	0	0	0	0	0	0	0	1
1	1980-05-22	210	160	6	49	42	1671.5	0	2	3	6037.38	5051.1	36.5345	2.23457	1980-05-19	1634.97	0	0	0	0	0	0	0	0	0	1
1	1980-05-27	190	140	6	50	43	1745.78	5	2	8	6306.64	5275.27	110.814	6.77778	1980-05-19	1634.97	5	0	0	0	0	0	0	0	5	1
1	1980-05-29	200	160	6	51	45	1860.23	5	2	10	6721.52	5620.68	225.262	13.7778	1980-05-19	1634.97	5	0	0	0	0	0	0	0	5	1
1	1980-06-02	200	150	6	51	46	1899.19	5	2	14	6862.73	5738.25	264.219	16.1605	1980-05-19	1634.97	5	0	0	0	0	0	0	0	5	1
1	1980-06-05	190	150	6	51	47	1938.55	100	2	17	7005.42	5857.04	303.579	18.5679	1980-05-19	1634.97	5	0	0	0	0	0	95	0	5	1
1	1980-06-09	270	180	6	51	47	1938.55	100	2	21	7005.42	5857.04	303.579	18.5679	1980-05-19	1634.97	5	0	0	0	0	0	0	95	5	1
1	1980-06-12	220	190	6	51	47	1938.55	100	3	24	7005.42	5857.04	303.579	18.5679	1980-05-19	1634.97	5	0	0	0	0	0	0	95	5	1
1	1980-05-19	200	170	7	39	39	1228.04	0	1	0	4429.84	3712.74	0	0	1980-05-19	1228.04	0	0	0	0	0	0	0	0	0	1
1	1980-05-22	210	160	7	39	39	1228.04	0	2	3	4429.84	3712.74	0	0	1980-05-19	1228.04	0	0	0	0	0	0	0	0	0	1
1	1980-05-27	190	140	7	39	39	1228.04	0	2	8	4429.84	3712.74	0	0	1980-05-19	1228.04	0	0	0	0	0	0	0	0	0	1
1	1980-05-29	200	160	7	39	39	1228.04	0	2	10	4429.84	3712.74	0	0	1980-05-19	1228.04	0	0	0	0	0	0	0	0	0	1
1	1980-06-02	200	150	7	39	39	1228.04	90	2	14	4429.84	3712.74	0	0	1980-05-19	1228.04	0	0	0	0	0	0	90	0	0	1
1	1980-06-05	190	150	7	40	39	1259.73	100	2	17	4544.71	3808.38	31.6901	2.58054	1980-05-19	1228.04	40	0	0	0	0	0	0	60	40	1
1	1980-06-09	270	180	7	40	39	1259.73	100	3	21	4544.71	3808.38	31.6901	2.58054	1980-05-19	1228.04	40	0	0	0	0	0	0	60	40	1
1	1980-05-19	200	170	8	36	32	933.344	15	1	0	3361.56	2823.34	0	0	1980-05-19	933.344	15	0	0	0	0	0	0	0	15	1
1	1980-05-22	210	160	8	39	40	1259.73	50	2	3	4544.71	3808.38	326.388	34.9697	1980-05-19	933.344	50	0	0	0	0	0	0	0	50	1
1	1980-05-27	190	140	8	40	40	1291.83	50	2	8	4661.05	3905.24	358.482	38.4083	1980-05-19	933.344	50	0	0	0	0	0	0	0	50	1
1	1980-05-29	200	160	8	40	40	1291.83	50	2	10	4661.05	3905.24	358.482	38.4083	1980-05-19	933.344	50	0	0	0	0	0	0	0	50	1
1	1980-06-02	200	150	8	40	40	1291.83	50	2	14	4661.05	3905.24	358.482	38.4083	1980-05-19	933.344	50	0	0	0	0	0	0	0	50	1
1	1980-06-05	190	150	8	40	40	1291.83	100	2	17	4661.05	3905.24	358.482	38.4083	1980-05-19	933.344	50	0	0	0	0	0	50	0	50	1
1	1980-06-09	270	180	8	40	40	1291.83	100	3	21	4661.05	3905.24	358.482	38.4083	1980-05-19	933.344	50	0	0	0	0	0	50	0	50	1
1	1980-05-19	200	170	9	55	52	2310.96	5	1	0	8355.4	6980.97	0	0	1980-05-19	2310.96	5	0	0	0	0	0	0	0	5	1
1	1980-05-22	210	160	9	59	55	2623.21	5	2	3	9487.34	7923.37	312.259	13.5121	1980-05-19	2310.96	5	0	0	0	0	0	0	0	5	1
1	1980-05-27	190	140	9	64	60	3103.61	20	2	8	11228.8	9373.21	792.656	34.2999	1980-05-19	2310.96	20	0	0	0	0	0	0	0	20	1
1	1980-05-29	200	160	9	64	60	3103.61	20	2	10	11228.8	9373.21	792.656	34.2999	1980-05-19	2310.96	20	0	0	0	0	0	0	0	20	1
1	1980-06-02	200	150	9	64	61	3153.87	20	2	14	11411	9524.89	842.916	36.4748	1980-05-19	2310.96	20	0	0	0	0	0	0	0	20	1
1	1980-06-05	190	150	9	64	62	3204.54	20	2	17	11594.6	9677.79	893.58	38.6671	1980-05-19	2310.96	20	0	0	0	0	0	0	0	20	1
1	1980-06-09	270	180	9	64	62	3204.54	25	2	21	11594.6	9677.79	893.58	38.6671	1980-05-19	2310.96	25	0	0	0	0	0	0	0	25	1
1	1980-06-12	220	190	9	64	62	3204.54	60	2	24	11594.6	9677.79	893.58	38.6671	1980-05-19	2310.96	30	0	0	0	0	0	20	10	30	1
1	1980-06-16	250	190	9	64	62	3204.54	60	3	28	11594.6	9677.79	893.58	38.6671	1980-05-19	2310.96	30	0	0	0	0	0	20	10	30	1
1	1980-05-19	200	170	10	40	45	1458.35	5	1	0	5264.71	4407.81	0	0	1980-05-19	1458.35	5	0	0	0	0	0	0	0	5	1
1	1980-05-22	210	160	10	45	46	1671.5	10	2	3	6037.38	5051.1	213.151	14.6159	1980-05-19	1458.35	10	0	0	0	0	0	0	0	10	1
1	1980-05-27	190	140	10	47	46	1745.78	30	2	8	6306.64	5275.27	287.431	19.7093	1980-05-19	1458.35	30	0	0	0	0	0	0	0	30	1
1	1980-05-29	200	160	10	48	46	1783.53	30	2	10	6443.47	5389.19	325.177	22.2976	1980-05-19	1458.35	30	0	0	0	0	0	0	0	30	1
1	1980-06-02	200	150	10	48	45	1745.78	30	2	14	6306.64	5275.27	287.431	19.7093	1980-05-19	1458.35	30	0	0	0	0	0	0	0	30	2
1	1980-06-05	190	150	10	48	45	1745.78	30	2	17	6306.64	5275.27	287.431	19.7093	1980-05-19	1458.35	30	0	0	0	0	0	0	0	30	2
1	1980-06-09	270	180	10	48	45	1745.78	100	2	21	6306.64	5275.27	287.431	19.7093	1980-05-19	1458.35	30	0	0	0	0	0	1	69	30	2
1	1980-06-12	220	190	10	48	45	1745.78	100	3	24	6306.64	5275.27	287.431	19.7093	1980-05-19	1458.35	30	0	0	0	0	0	1	69	30	2
1	1980-05-19	200	170	11	38	37	1135.39	100	1	0	4093.99	3433.12	0	0	1980-05-19	1135.39	0	0	0	0	0	0	5	95	0	2
1	1980-05-22	210	160	11	38	37	1135.39	100	3	3	4093.99	3433.12	0	0	1980-05-19	1135.39	0	0	0	0	0	0	5	95	0	2
1	1980-05-19	200	170	12	40	41	1324.32	0	1	0	4778.86	4003.31	0	0	1980-05-19	1324.32	0	0	0	0	0	0	0	0	0	2
1	1980-05-22	210	160	12	41	41	1357.22	0	2	3	4898.12	4102.61	32.9012	2.48438	1980-05-19	1324.32	0	0	0	0	0	0	0	0	0	2
1	1980-05-27	190	140	12	41	42	1390.53	0	2	8	5018.85	4203.12	66.2061	4.99924	1980-05-19	1324.32	0	0	0	0	0	0	0	0	0	2
1	1980-05-29	200	160	12	41	42	1390.53	0	2	10	5018.85	4203.12	66.2061	4.99924	1980-05-19	1324.32	0	0	0	0	0	0	0	0	0	2
1	1980-06-02	200	150	12	42	43	1458.35	5	2	14	5264.71	4407.81	134.027	10.1204	1980-05-19	1324.32	5	0	0	0	0	0	0	0	5	2
1	1980-06-05	190	150	12	42	43	1458.35	100	2	17	5264.71	4407.81	134.027	10.1204	1980-05-19	1324.32	5	0	0	0	0	0	10	85	5	2
1	1980-06-09	270	180	12	42	43	1458.35	100	3	21	5264.71	4407.81	134.027	10.1204	1980-05-19	1324.32	5	0	0	0	0	0	10	85	5	2
1	1980-05-19	200	170	13	31	30	751.076	60	1	0	2700.83	2273.25	0	0	1980-05-19	751.076	60	0	0	0	0	0	0	0	60	2
1	1980-05-22	210	160	13	31	30	751.076	60	3	3	2700.83	2273.25	0	0	1980-05-19	751.076	60	0	0	0	0	0	0	0	60	2
1	1980-05-19	200	170	14	31	30	751.076	60	1	0	2700.83	2273.25	0	0	1980-05-19	751.076	60	0	0	0	0	0	0	0	60	2
1	1980-05-22	210	160	14	31	30	751.076	60	3	3	2700.83	2273.25	0	0	1980-05-19	751.076	60	0	0	0	0	0	0	0	60	2
1	1980-05-19	200	170	15	33	34	906.095	30	1	0	3262.78	2741.1	0	0	1980-05-19	906.095	30	0	0	0	0	0	0	0	30	2
1	1980-05-22	210	160	15	35	36	1017.51	30	2	3	3666.68	3077.37	111.42	12.2967	1980-05-19	906.095	30	0	0	0	0	0	0	0	30	2
1	1980-05-27	190	140	15	35	36	1017.51	40	2	8	3666.68	3077.37	111.42	12.2967	1980-05-19	906.095	40	0	0	0	0	0	0	0	40	2
1	1980-05-29	200	160	15	35	36	1017.51	55	2	10	3666.68	3077.37	111.42	12.2967	1980-05-19	906.095	55	0	0	0	0	0	0	0	55	2
1	1980-06-02	200	150	15	35	36	1017.51	100	2	14	3666.68	3077.37	111.42	12.2967	1980-05-19	906.095	55	0	0	0	0	0	45	0	55	2
1	1980-06-05	190	150	15	35	36	1017.51	100	3	17	3666.68	3077.37	111.42	12.2967	1980-05-19	906.095	55	0	0	0	0	0	45	0	55	2
1	1980-05-19	200	170	16	47	43	1634.97	0	1	0	5904.94	4940.84	0	0	1980-05-19	1634.97	0	0	0	0	0	0	0	0	0	2
1	1980-05-22	210	160	16	51	49	2018.48	5	2	3	7295.17	6098.27	383.511	23.4568	1980-05-19	1634.97	5	0	0	0	0	0	0	0	5	2
1	1980-05-27	190	140	16	53	50	2141.4	5	2	8	7740.77	6469.26	506.436	30.9753	1980-05-19	1634.97	5	0	0	0	0	0	0	0	5	2
1	1980-05-29	200	160	16	53	50	2141.4	5	2	10	7740.77	6469.26	506.436	30.9753	1980-05-19	1634.97	5	0	0	0	0	0	0	0	5	2
1	1980-06-02	200	150	16	55	51	2267.96	5	2	14	8199.55	6851.21	632.995	38.716	1980-05-19	1634.97	5	0	0	0	0	0	0	0	5	2
1	1980-06-05	190	150	16	55	51	2267.96	5	2	17	8199.55	6851.21	632.995	38.716	1980-05-19	1634.97	5	0	0	0	0	0	0	0	5	2
1	1980-06-09	270	180	16	55	51	2267.96	35	2	21	8199.55	6851.21	632.995	38.716	1980-05-19	1634.97	5	0	0	0	0	0	10	20	5	2
1	1980-06-12	220	190	16	55	51	2267.96	100	2	24	8199.55	6851.21	632.995	38.716	1980-05-19	1634.97	5	0	0	0	0	0	0	95	5	2
1	1980-06-16	250	190	16	55	51	2267.96	100	3	28	8199.55	6851.21	632.995	38.716	1980-05-19	1634.97	5	0	0	0	0	0	0	95	5	2
1	1980-05-19	200	170	17	26	24	504.62	15	1	0	1807.43	1529.45	0	0	1980-05-19	504.62	15	0	0	0	0	0	0	0	15	2
1	1980-05-22	210	160	17	26	24	504.62	70	2	3	1807.43	1529.45	0	0	1980-05-19	504.62	70	0	0	0	0	0	0	0	70	2
1	1980-05-27	190	140	17	26	24	504.62	100	2	8	1807.43	1529.45	0	0	1980-05-19	504.62	70	0	0	0	0	0	30	0	70	2
1	1980-05-29	200	160	17	26	24	504.62	100	3	10	1807.43	1529.45	0	0	1980-05-19	504.62	70	0	0	0	0	0	30	0	70	2
1	1980-05-22	210	160	18	60	55	2669.44	5	1	0	9654.89	8062.87	0	0	1980-05-22	2669.44	0	0	5	0	0	0	0	0	5	2
1	1980-05-27	190	140	18	70	64	3624.38	5	2	5	13116.6	10944.9	954.942	35.7732	1980-05-22	2669.44	0	0	5	0	0	0	0	0	5	2
1	1980-05-29	200	160	18	60	61	2955.25	5	2	7	10691	8925.46	285.816	10.707	1980-05-22	2669.44	0	0	5	0	0	0	0	0	5	2
1	1980-06-02	200	150	18	73	65	3843.99	5	2	11	13912.6	11607.7	1174.55	44	1980-05-22	2669.44	0	0	5	0	0	0	0	0	5	2
1	1980-06-05	190	150	18	73	65	3843.99	5	2	14	13912.6	11607.7	1174.55	44	1980-05-22	2669.44	0	0	5	0	0	0	0	0	5	2
1	1980-06-09	270	180	18	73	65	3843.99	100	2	18	13912.6	11607.7	1174.55	44	1980-05-22	2669.44	0	0	5	0	0	0	1	94	5	2
1	1980-06-12	220	190	18	73	65	3843.99	100	3	21	13912.6	11607.7	1174.55	44	1980-05-22	2669.44	0	0	5	0	0	0	1	94	5	2
1	1980-05-22	210	160	19	60	50	2442.36	0	1	0	8831.73	7377.54	0	0	1980-05-22	2442.36	0	0	0	0	0	0	0	0	0	2
1	1980-05-27	190	140	19	70	64	3624.38	0	2	5	13116.6	10944.9	1182.02	48.3967	1980-05-22	2442.36	0	0	0	0	0	0	0	0	0	2
1	1980-05-29	200	160	19	75	65	3956.22	0	2	7	14319.5	11946.4	1513.86	61.9835	1980-05-22	2442.36	0	0	0	0	0	0	0	0	0	2
1	1980-06-02	200	150	19	80	68	4421.27	0	2	11	16005.3	13349.9	1978.92	81.0248	1980-05-22	2442.36	0	0	0	0	0	0	0	0	0	2
1	1980-06-05	190	150	19	80	69	4481.22	1	2	14	16222.6	13530.8	2038.86	83.4793	1980-05-22	2442.36	1	0	0	0	0	0	0	0	1	2
1	1980-06-09	270	180	19	80	69	4481.22	2	2	18	16222.6	13530.8	2038.86	83.4793	1980-05-22	2442.36	2	0	0	0	0	0	0	0	2	2
1	1980-06-12	220	190	19	81	70	4602.33	20	2	21	16661.6	13896.3	2159.97	88.438	1980-05-22	2442.36	20	0	0	0	0	0	0	0	20	2
1	1980-06-16	250	190	19	81	70	4602.33	35	2	25	16661.6	13896.3	2159.97	88.438	1980-05-22	2442.36	35	0	0	0	0	0	0	0	35	2
1	1980-06-23	170	150	19	91	70	5232.1	35	3	32	18944.5	15797	2789.74	114.223	1980-05-22	2442.36	35	0	0	0	0	0	0	0	35	2
1	1980-05-22	210	160	20	56	50	2267.96	5	1	0	8199.55	6851.21	0	0	1980-05-22	2267.96	0	0	5	0	0	0	0	0	5	2
1	1980-05-27	190	140	20	62	56	2810.53	5	2	5	10166.4	8488.68	542.567	23.9231	1980-05-22	2267.96	0	0	5	0	0	0	0	0	5	2
1	1980-05-29	200	160	20	63	56	2858.37	5	2	7	10339.8	8633.06	590.405	26.0324	1980-05-22	2267.96	0	0	5	0	0	0	0	0	5	2
1	1980-06-02	200	150	20	67	59	3204.54	10	2	11	11594.6	9677.79	936.574	41.2958	1980-05-22	2267.96	5	0	5	0	0	0	0	0	10	2
1	1980-06-05	190	150	20	68	59	3255.6	10	2	14	11779.7	9831.92	987.641	43.5475	1980-05-22	2267.96	5	0	5	0	0	0	0	0	10	2
1	1980-06-09	270	180	20	68	60	3307.07	15	2	18	11966.3	9987.26	1039.11	45.817	1980-05-22	2267.96	10	0	5	0	0	0	0	0	15	2
1	1980-06-12	220	190	20	68	60	3307.07	15	3	21	11966.3	9987.26	1039.11	45.817	1980-05-22	2267.96	10	0	5	0	0	0	0	0	15	2
1	1980-05-22	210	160	21	60	50	2442.36	50	1	0	8831.73	7377.54	0	0	1980-05-22	2442.36	40	0	10	0	0	0	0	0	50	2
1	1980-05-27	190	140	21	65	60	3153.87	55	2	5	11411	9524.89	711.513	29.1322	1980-05-22	2442.36	45	0	10	0	0	0	0	0	55	2
1	1980-05-29	200	160	21	70	70	3956.22	60	2	7	14319.5	11946.4	1513.86	61.9835	1980-05-22	2442.36	50	0	10	0	0	0	0	0	60	3
1	1980-06-02	200	150	21	73	70	4127.59	60	2	11	14940.7	12463.6	1685.23	69	1980-05-22	2442.36	50	0	10	0	0	0	0	0	60	3
1	1980-06-05	190	150	21	73	71	4185.52	60	2	14	15150.7	12638.4	1743.16	71.3719	1980-05-22	2442.36	50	0	10	0	0	0	0	0	60	3
1	1980-06-09	270	180	21	74	72	4302.59	64	2	18	15575.1	12991.7	1860.23	76.1653	1980-05-22	2442.36	50	0	10	0	0	0	2	2	60	3
1	1980-06-12	220	190	21	74	72	4302.59	90	2	21	15575.1	12991.7	1860.23	76.1653	1980-05-22	2442.36	50	0	10	0	0	0	15	15	60	3
1	1980-06-16	250	190	21	74	72	4302.59	90	3	25	15575.1	12991.7	1860.23	76.1653	1980-05-22	2442.36	50	0	10	0	0	0	15	15	60	3
1	1980-05-27	190	140	22	71	64	3678.68	0	1	0	13313.4	11108.8	0	0	1980-05-27	3678.68	0	0	0	0	0	0	0	0	0	3
1	1980-05-29	200	160	22	77	65	4070.06	0	2	2	14732.1	12289.9	391.383	10.6392	1980-05-27	3678.68	0	0	0	0	0	0	0	0	0	3
1	1980-06-02	200	150	22	80	68	4421.27	0	2	6	16005.3	13349.9	742.598	20.1866	1980-05-27	3678.68	0	0	0	0	0	0	0	0	0	3
1	1980-06-05	190	150	22	80	68	4421.27	1	2	9	16005.3	13349.9	742.598	20.1866	1980-05-27	3678.68	1	0	0	0	0	0	0	0	1	3
1	1980-06-09	270	180	22	80	68	4421.27	3	2	13	16005.3	13349.9	742.598	20.1866	1980-05-27	3678.68	3	0	0	0	0	0	0	0	3	3
1	1980-06-12	220	190	22	81	69	4541.58	8	2	16	16441.4	13713	862.899	23.4568	1980-05-27	3678.68	8	0	0	0	0	0	0	0	8	3
1	1980-06-16	250	190	22	81	70	4602.33	13	2	20	16661.6	13896.3	923.656	25.1084	1980-05-27	3678.68	10	0	0	0	0	0	3	0	10	3
1	1980-06-23	170	150	22	81	70	4602.33	13	3	27	16661.6	13896.3	923.656	25.1084	1980-05-27	3678.68	10	0	0	0	0	0	3	0	10	3
1	1980-05-27	190	140	23	94	76	5833.4	0	1	0	21124.3	17611.7	0	0	1980-05-27	5833.4	0	0	0	0	0	0	0	0	0	3
1	1980-05-29	200	160	23	96	78	6111.14	0	2	2	22131.1	18449.9	277.743	4.76125	1980-05-27	5833.4	0	0	0	0	0	0	0	0	0	3
1	1980-06-02	200	150	23	104	84	7134.11	0	2	6	25839.3	21537.2	1300.71	22.2976	1980-05-27	5833.4	0	0	0	0	0	0	0	0	0	3
1	1980-06-05	190	150	23	104	84	7134.11	1	2	9	25839.3	21537.2	1300.71	22.2976	1980-05-27	5833.4	1	0	0	0	0	0	0	0	1	3
1	1980-06-09	270	180	23	107	85	7440.92	2	2	13	26951.5	22463.2	1607.52	27.5571	1980-05-27	5833.4	2	0	0	0	0	0	0	0	2	3
1	1980-06-12	220	190	23	107	86	7518.63	15	2	16	27233.2	22697.7	1685.23	28.8893	1980-05-27	5833.4	15	0	0	0	0	0	0	0	15	3
1	1980-06-16	250	190	23	107	86	7518.63	18	2	20	27233.2	22697.7	1685.23	28.8893	1980-05-27	5833.4	15	0	0	0	0	0	3	0	15	3
1	1980-06-23	170	150	23	107	86	7518.63	18	3	27	27233.2	22697.7	1685.23	28.8893	1980-05-27	5833.4	15	0	0	0	0	0	3	0	15	3
1	1980-05-27	190	140	24	62	58	2906.61	0	1	0	10514.6	8778.65	0	0	1980-05-27	2906.61	0	0	0	0	0	0	0	0	0	3
1	1980-05-29	200	160	24	64	58	3004.3	5	2	2	10868.8	9073.49	97.6943	3.36111	1980-05-27	2906.61	5	0	0	0	0	0	0	0	5	3
1	1980-06-02	200	150	24	66	58	3103.61	5	2	6	11228.8	9373.21	197.003	6.77778	1980-05-27	2906.61	5	0	0	0	0	0	0	0	5	3
1	1980-06-05	190	150	24	66	60	3204.54	5	2	9	11594.6	9677.79	297.927	10.25	1980-05-27	2906.61	5	0	0	0	0	0	0	0	5	3
1	1980-06-09	270	180	24	67	60	3255.6	9	2	13	11779.7	9831.92	348.995	12.0069	1980-05-27	2906.61	5	0	0	0	0	0	1	3	5	3
1	1980-06-12	220	190	24	67	61	3307.07	45	2	16	11966.3	9987.26	400.466	13.7778	1980-05-27	2906.61	5	0	0	0	0	0	30	10	5	3
1	1980-06-16	250	190	24	67	61	3307.07	45	3	20	11966.3	9987.26	400.466	13.7778	1980-05-27	2906.61	5	0	0	0	0	0	30	10	5	3
1	1980-05-27	190	140	25	65	56	2955.25	0	1	0	10691	8925.46	0	0	1980-05-27	2955.25	0	0	0	0	0	0	0	0	0	3
1	1980-05-29	200	160	25	72	62	3624.38	0	2	2	13116.6	10944.9	669.125	22.6419	1980-05-27	2955.25	0	0	0	0	0	0	0	0	0	3
1	1980-06-02	200	150	25	82	69	4602.33	0	2	6	16661.6	13896.3	1647.08	55.7339	1980-05-27	2955.25	0	0	0	0	0	0	0	0	0	3
1	1980-06-05	190	150	25	83	70	4725.06	0	2	9	17106.5	14266.7	1769.8	59.8866	1980-05-27	2955.25	0	0	0	0	0	0	0	0	0	3
1	1980-06-09	270	180	25	84	71	4849.39	2	2	13	17557.2	14642	1894.14	64.094	1980-05-27	2955.25	2	0	0	0	0	0	0	0	2	3
1	1980-06-12	220	190	25	85	72	4975.35	5	2	16	18013.8	15022.1	2020.09	68.356	1980-05-27	2955.25	5	0	0	0	0	0	0	0	5	3
1	1980-06-16	250	190	25	85	72	4975.35	30	2	20	18013.8	15022.1	2020.09	68.356	1980-05-27	2955.25	10	0	0	0	0	0	20	0	10	3
1	1980-06-23	170	150	25	85	72	4975.35	30	3	27	18013.8	15022.1	2020.09	68.356	1980-05-27	2955.25	10	0	0	0	0	0	20	0	10	3
1	1980-05-27	190	140	26	65	58	3053.76	0	1	0	11048	9222.74	0	0	1980-05-27	3053.76	0	0	0	0	0	0	0	0	0	3
1	1980-05-29	200	160	26	65	58	3053.76	0	2	2	11048	9222.74	0	0	1980-05-27	3053.76	0	0	0	0	0	0	0	0	0	3
1	1980-06-02	200	150	26	66	58	3103.61	0	2	6	11228.8	9373.21	49.8564	1.63263	1980-05-27	3053.76	0	0	0	0	0	0	0	0	0	3
1	1980-06-05	190	150	26	68	59	3255.6	1	2	9	11779.7	9831.92	201.848	6.60982	1980-05-27	3053.76	1	0	0	0	0	0	0	0	1	3
1	1980-06-09	270	180	26	68	59	3255.6	3	2	13	11779.7	9831.92	201.848	6.60982	1980-05-27	3053.76	3	0	0	0	0	0	0	0	3	3
1	1980-06-12	220	190	26	68	60	3307.07	20	2	16	11966.3	9987.26	253.319	8.29533	1980-05-27	3053.76	15	0	0	0	0	0	5	0	15	3
1	1980-06-16	250	190	26	68	60	3307.07	100	2	20	11966.3	9987.26	253.319	8.29533	1980-05-27	3053.76	15	0	0	0	0	0	2	83	15	3
1	1980-06-23	170	150	26	68	60	3307.07	100	3	27	11966.3	9987.26	253.319	8.29533	1980-05-27	3053.76	15	0	0	0	0	0	2	83	15	3
1	1980-05-27	190	140	27	72	61	3570.49	0	1	0	12921.2	10782.2	0	0	1980-05-27	3570.49	0	0	0	0	0	0	0	0	0	3
1	1980-05-29	200	160	27	78	66	4185.52	0	2	2	15150.7	12638.4	615.03	17.2254	1980-05-27	3570.49	0	0	0	0	0	0	0	0	0	3
1	1980-06-02	200	150	27	84	71	4849.39	0	2	6	17557.2	14642	1278.91	35.8189	1980-05-27	3570.49	0	0	0	0	0	0	0	0	0	3
1	1980-06-05	190	150	27	84	71	4849.39	1	2	9	17557.2	14642	1278.91	35.8189	1980-05-27	3570.49	1	0	0	0	0	0	0	0	1	3
1	1980-06-09	270	180	27	85	72	4975.35	10	2	13	18013.8	15022.1	1404.86	39.3465	1980-05-27	3570.49	10	0	0	0	0	0	0	0	10	3
1	1980-06-12	220	190	27	85	74	5102.91	10	2	16	18476.2	15407.1	1532.43	42.9193	1980-05-27	3570.49	10	0	0	0	0	0	0	0	10	3
1	1980-06-16	250	190	27	85	74	5102.91	15	2	20	18476.2	15407.1	1532.43	42.9193	1980-05-27	3570.49	10	0	0	0	0	0	5	0	10	3
1	1980-06-23	170	150	27	85	74	5102.91	15	3	27	18476.2	15407.1	1532.43	42.9193	1980-05-27	3570.49	10	0	0	0	0	0	5	0	10	3
1	1980-05-27	190	140	28	47	40	1527.79	0	1	0	5516.41	4617.36	0	0	1980-05-27	1527.79	0	0	0	0	0	0	0	0	0	3
1	1980-05-29	200	160	28	57	48	2225.37	0	2	2	8045.16	6722.68	697.586	45.6599	1980-05-27	1527.79	0	0	0	0	0	0	0	0	0	3
1	1980-06-02	200	150	28	69	52	2955.25	0	2	6	10691	8925.46	1427.47	93.4337	1980-05-27	1527.79	0	0	0	0	0	0	0	0	0	3
1	1980-06-05	190	150	28	64	57	2955.25	2	2	9	10691	8925.46	1427.47	93.4337	1980-05-27	1527.79	1	0	1	0	0	0	0	0	2	3
1	1980-06-09	270	180	28	68	58	3204.54	2	2	13	11594.6	9677.79	1676.75	109.75	1980-05-27	1527.79	1	0	1	0	0	0	0	0	2	3
1	1980-06-12	220	190	28	69	60	3358.95	3	2	16	12154.4	10143.8	1831.16	119.857	1980-05-27	1527.79	2	0	1	0	0	0	0	0	3	3
1	1980-06-16	250	190	28	69	66	3678.68	41	2	20	13313.4	11108.8	2150.89	140.785	1980-05-27	1527.79	5	0	1	0	0	0	25	10	6	3
1	1980-06-23	170	150	28	69	66	3678.68	41	3	27	13313.4	11108.8	2150.89	140.785	1980-05-27	1527.79	5	0	1	0	0	0	25	10	6	3
1	1980-05-27	190	140	29	68	65	3570.49	5	1	0	12921.2	10782.2	0	0	1980-05-27	3570.49	0	0	5	0	0	0	0	0	5	4
1	1980-05-29	200	160	29	70	66	3733.38	5	2	2	13511.7	11273.8	162.891	4.56216	1980-05-27	3570.49	0	0	5	0	0	0	0	0	5	4
1	1980-06-02	200	150	29	71	67	3843.99	6	2	6	13912.6	11607.7	273.504	7.66013	1980-05-27	3570.49	1	0	5	0	0	0	0	0	6	4
1	1980-06-05	190	150	29	64	68	3517	6	2	9	12727.3	10620.8	-53.4897	-1.49811	1980-05-27	3570.49	1	0	5	0	0	0	0	0	6	4
1	1980-06-09	270	180	29	71	68	3899.9	30	2	13	14115.3	11776.4	329.416	9.22607	1980-05-27	3570.49	25	0	5	0	0	0	0	0	30	4
1	1980-06-12	220	190	29	73	68	4012.94	100	2	16	14525.1	12117.5	442.45	12.3919	1980-05-27	3570.49	25	0	5	0	0	0	45	25	30	4
1	1980-06-16	250	190	29	73	68	4012.94	100	3	20	14525.1	12117.5	442.45	12.3919	1980-05-27	3570.49	25	0	5	0	0	0	45	25	30	4
1	1980-05-27	190	140	30	64	51	2669.44	0	1	0	9654.89	8062.87	0	0	1980-05-27	2669.44	0	0	0	0	0	0	0	0	0	4
1	1980-05-29	200	160	30	67	57	3103.61	0	2	2	11228.8	9373.21	434.175	16.2647	1980-05-27	2669.44	0	0	0	0	0	0	0	0	0	4
1	1980-06-02	200	150	30	67	57	3103.61	0	3	6	11228.8	9373.21	434.175	16.2647	1980-05-27	2669.44	0	0	0	0	0	0	0	0	0	4
1	1980-05-27	190	140	31	65	53	2810.53	0	1	0	10166.4	8488.68	0	0	1980-05-27	2810.53	0	0	0	0	0	0	0	0	0	4
1	1980-05-29	200	160	31	77	64	4012.94	0	2	2	14525.1	12117.5	1202.41	42.7822	1980-05-27	2810.53	0	0	0	0	0	0	0	0	0	4
1	1980-06-02	200	150	31	86	72	5038.93	0	2	6	18244.3	15214	2228.4	79.2876	1980-05-27	2810.53	0	0	0	0	0	0	0	0	0	4
1	1980-06-05	190	150	31	87	73	5167.3	2	2	9	18709.7	15601.4	2356.77	83.8552	1980-05-27	2810.53	2	0	0	0	0	0	0	0	2	4
1	1980-06-09	270	180	31	89	74	5362.89	6	2	13	19418.7	16191.7	2552.37	90.8144	1980-05-27	2810.53	6	0	0	0	0	0	0	0	6	4
1	1980-06-12	220	190	31	90	76	5562.12	8	2	16	20140.9	16793	2751.59	97.9029	1980-05-27	2810.53	8	0	0	0	0	0	0	0	8	4
1	1980-06-16	250	190	31	91	76	5629.33	10	2	20	20384.5	16995.8	2818.8	100.294	1980-05-27	2810.53	10	0	0	0	0	0	0	0	10	4
1	1980-06-23	170	150	31	91	76	5629.33	10	3	27	20384.5	16995.8	2818.8	100.294	1980-05-27	2810.53	10	0	0	0	0	0	0	0	10	4
1	1980-05-29	200	160	32	92	76	5696.95	0	1	0	20629.6	17199.9	0	0	1980-05-29	5696.95	0	0	0	0	0	0	0	0	0	4
1	1980-06-02	200	150	32	100	83	6759.68	0	2	4	24482	20407.2	1062.73	18.6543	1980-05-29	5696.95	0	0	0	0	0	0	0	0	0	4
1	1980-06-05	190	150	32	100	84	6833.76	1	2	7	24750.6	20630.8	1136.81	19.9546	1980-05-29	5696.95	1	0	0	0	0	0	0	0	1	4
1	1980-06-09	270	180	32	101	85	6983.13	1	2	11	25292	21081.6	1286.17	22.5765	1980-05-29	5696.95	1	0	0	0	0	0	0	0	1	4
1	1980-06-12	220	190	32	101	85	6983.13	3	2	14	25292	21081.6	1286.17	22.5765	1980-05-29	5696.95	3	0	0	0	0	0	0	0	3	4
1	1980-06-16	250	190	32	102	85	7058.42	16	2	18	25564.9	21308.8	1361.46	23.8981	1980-05-29	5696.95	10	0	0	0	0	0	3	3	10	4
1	1980-06-23	170	150	32	102	85	7058.42	16	3	25	25564.9	21308.8	1361.46	23.8981	1980-05-29	5696.95	10	0	0	0	0	0	3	3	10	4
1	1980-05-29	200	160	33	70	57	3255.6	0	1	0	11779.7	9831.92	0	0	1980-05-29	3255.6	0	0	0	0	0	0	0	0	0	4
1	1980-06-02	200	150	33	80	67	4361.73	0	2	4	15789.5	13170.2	1106.13	33.9761	1980-05-29	3255.6	0	0	0	0	0	0	0	0	0	4
1	1980-06-05	190	150	33	80	68	4421.27	2	2	7	16005.3	13349.9	1165.67	35.8051	1980-05-29	3255.6	1	0	1	0	0	0	0	0	2	4
1	1980-06-09	270	180	33	80	69	4481.22	6	2	11	16222.6	13530.8	1225.62	37.6465	1980-05-29	3255.6	5	0	1	0	0	0	0	0	6	4
1	1980-06-12	220	190	33	82	70	4663.49	8	2	14	16883.3	14080.9	1407.89	43.2451	1980-05-29	3255.6	7	0	1	0	0	0	0	0	8	4
1	1980-06-16	250	190	33	82	71	4725.06	48	2	18	17106.5	14266.7	1469.45	45.1361	1980-05-29	3255.6	7	0	1	0	0	0	25	15	8	4
1	1980-06-23	170	150	33	82	71	4725.06	48	3	25	17106.5	14266.7	1469.45	45.1361	1980-05-29	3255.6	7	0	1	0	0	0	25	15	8	4
1	1980-05-29	200	160	34	55	55	2442.36	25	1	0	8831.73	7377.54	0	0	1980-05-29	2442.36	0	0	25	0	0	0	0	0	25	4
1	1980-06-02	200	150	34	55	55	2442.36	25	3	4	8831.73	7377.54	0	0	1980-05-29	2442.36	0	0	25	0	0	0	0	0	25	4
1	1980-05-29	200	160	35	73	56	3358.95	0	1	0	12154.4	10143.8	0	0	1980-05-29	3358.95	0	0	0	0	0	0	0	0	0	4
1	1980-06-02	200	150	35	95	76	5902.23	0	2	4	21373.8	17819.4	2543.28	75.7166	1980-05-29	3358.95	0	0	0	0	0	0	0	0	0	4
1	1980-06-05	190	150	35	102	80	6686.01	2	2	7	24215	20184.9	3327.06	99.0505	1980-05-29	3358.95	1	0	1	0	0	0	0	0	2	4
1	1980-06-09	270	180	35	106	84	7286.71	2	2	11	26392.5	21997.8	3927.76	116.934	1980-05-29	3358.95	1	0	1	0	0	0	0	0	2	4
1	1980-06-12	220	190	35	108	85	7518.63	3	2	14	27233.2	22697.7	4159.68	123.839	1980-05-29	3358.95	2	0	1	0	0	0	0	0	3	4
1	1980-06-16	250	190	35	108	85	7518.63	10	2	18	27233.2	22697.7	4159.68	123.839	1980-05-29	3358.95	9	0	1	0	0	0	0	0	10	4
1	1980-06-23	170	150	35	108	85	7518.63	10	3	25	27233.2	22697.7	4159.68	123.839	1980-05-29	3358.95	9	0	1	0	0	0	0	0	10	4
1	1980-05-29	200	160	36	82	70	4663.49	0	1	0	16883.3	14080.9	0	0	1980-05-29	4663.49	0	0	0	0	0	0	0	0	0	4
1	1980-06-02	200	150	36	86	74	5167.3	0	2	4	18709.7	15601.4	503.812	10.8033	1980-05-29	4663.49	0	0	0	0	0	0	0	0	0	4
1	1980-06-05	190	150	36	87	74	5232.1	0	2	7	18944.5	15797	568.605	12.1927	1980-05-29	4663.49	0	0	0	0	0	0	0	0	0	4
1	1980-06-09	270	180	36	87	75	5297.29	5	2	11	19180.9	15993.7	633.802	13.5907	1980-05-29	4663.49	5	0	0	0	0	0	0	0	5	4
1	1980-06-12	220	190	36	87	76	5362.89	15	2	14	19418.7	16191.7	699.403	14.9974	1980-05-29	4663.49	15	0	0	0	0	0	0	0	15	4
1	1980-06-16	250	190	36	87	77	5428.9	20	2	18	19657.9	16390.9	765.407	16.4127	1980-05-29	4663.49	15	0	0	0	0	0	5	0	15	4
1	1980-06-23	170	150	36	87	77	5428.9	20	3	25	19657.9	16390.9	765.407	16.4127	1980-05-29	4663.49	15	0	0	0	0	0	5	0	15	4
1	1980-05-29	200	160	37	75	60	3678.68	0	1	0	13313.4	11108.8	0	0	1980-05-29	3678.68	0	0	0	0	0	0	0	0	0	4
1	1980-06-02	200	150	37	88	70	5038.93	0	2	4	18244.3	15214	1360.25	36.9767	1980-05-29	3678.68	0	0	0	0	0	0	0	0	0	4
1	1980-06-05	190	150	37	93	72	5495.31	0	2	7	19898.7	16591.3	1816.63	49.3827	1980-05-29	3678.68	0	0	0	0	0	0	0	0	0	4
1	1980-06-09	270	180	37	94	75	5764.98	3	2	11	20876.2	17405.2	2086.3	56.7133	1980-05-29	3678.68	3	0	0	0	0	0	0	0	3	4
1	1980-06-12	220	190	37	94	76	5833.4	10	2	14	21124.3	17611.7	2154.73	58.5734	1980-05-29	3678.68	10	0	0	0	0	0	0	0	10	4
1	1980-06-16	250	190	37	94	77	5902.23	32	2	18	21373.8	17819.4	2223.56	60.4444	1980-05-29	3678.68	25	0	0	0	0	0	2	5	25	4
1	1980-06-23	170	150	37	94	77	5902.23	32	3	25	21373.8	17819.4	2223.56	60.4444	1980-05-29	3678.68	25	0	0	0	0	0	2	5	25	4
1	1980-05-29	200	160	38	72	57	3358.95	0	1	0	12154.4	10143.8	0	0	1980-05-29	3358.95	0	0	0	0	0	0	0	0	0	4
1	1980-06-02	200	150	38	84	68	4663.49	0	2	4	16883.3	14080.9	1304.54	38.8378	1980-05-29	3358.95	0	0	0	0	0	0	0	0	0	4
1	1980-06-05	190	150	38	85	59	4185.52	1	2	7	15150.7	12638.4	826.567	24.6079	1980-05-29	3358.95	1	0	0	0	0	0	0	0	1	4
1	1980-06-09	270	180	38	87	70	4975.35	5	2	11	18013.8	15022.1	1616.4	48.1221	1980-05-29	3358.95	5	0	0	0	0	0	0	0	5	4
1	1980-06-12	220	190	38	87	70	4975.35	10	2	14	18013.8	15022.1	1616.4	48.1221	1980-05-29	3358.95	10	0	0	0	0	0	0	0	10	4
1	1980-06-16	250	190	38	87	72	5102.91	13	2	18	18476.2	15407.1	1743.96	51.92	1980-05-29	3358.95	10	0	0	0	0	0	3	0	10	4
1	1980-06-23	170	150	38	87	72	5102.91	13	3	25	18476.2	15407.1	1743.96	51.92	1980-05-29	3358.95	10	0	0	0	0	0	3	0	10	5
1	1980-05-29	200	160	39	77	60	3788.48	2	1	0	13711.4	11440.1	0	0	1980-05-29	3788.48	2	0	0	0	0	0	0	0	2	5
1	1980-06-02	200	150	39	94	73	5629.33	5	2	4	20384.5	16995.8	1840.85	48.5908	1980-05-29	3788.48	5	0	0	0	0	0	0	0	5	5
1	1980-06-05	190	150	39	99	77	6252.44	6	2	7	22643.3	18876.4	2463.96	65.0381	1980-05-29	3788.48	6	0	0	0	0	0	0	0	6	5
1	1980-06-09	270	180	39	104	81	6908.24	8	2	11	25020.6	20855.6	3119.76	82.3486	1980-05-29	3788.48	8	0	0	0	0	0	0	0	8	5
1	1980-06-12	220	190	39	104	83	7058.42	8	2	14	25564.9	21308.8	3269.93	86.3125	1980-05-29	3788.48	8	0	0	0	0	0	0	0	8	5
1	1980-06-16	250	190	39	104	84	7134.11	8	2	18	25839.3	21537.2	3345.63	88.3105	1980-05-29	3788.48	8	0	0	0	0	0	0	0	8	5
1	1980-06-23	170	150	39	104	84	7134.11	18	2	25	25839.3	21537.2	3345.63	88.3105	1980-05-29	3788.48	8	0	0	0	0	0	5	5	8	5
1	1980-06-26	170	150	39	104	90	7596.74	93	2	28	27516.4	22933.5	3808.26	100.522	1980-05-29	3788.48	8	0	0	0	0	0	35	50	8	5
1	1980-06-30	180	150	39	104	90	7596.74	93	3	32	27516.4	22933.5	3808.26	100.522	1980-05-29	3788.48	8	0	0	0	0	0	35	50	8	5
1	1980-05-29	200	160	40	45	37	1357.22	0	1	0	4898.12	4102.61	0	0	1980-05-29	1357.22	0	0	0	0	0	0	0	0	0	5
1	1980-06-02	200	150	40	49	40	1598.84	0	2	4	5773.97	4831.79	241.612	17.8019	1980-05-29	1357.22	0	0	0	0	0	0	0	0	0	5
1	1980-06-05	190	150	40	49	40	1598.84	1	2	7	5773.97	4831.79	241.612	17.8019	1980-05-29	1357.22	1	0	0	0	0	0	0	0	1	5
1	1980-06-09	270	180	40	49	41	1634.97	100	2	11	5904.94	4940.84	277.743	20.464	1980-05-29	1357.22	1	0	0	0	0	0	74	25	1	5
1	1980-06-12	220	190	40	49	41	1634.97	100	3	14	5904.94	4940.84	277.743	20.464	1980-05-29	1357.22	1	0	0	0	0	0	74	25	1	5
1	1980-06-02	200	150	41	66	55	2955.25	0	1	0	10691	8925.46	0	0	1980-06-02	2955.25	0	0	0	0	0	0	0	0	0	5
1	1980-06-05	190	150	41	75	70	4243.85	2	2	3	15362.1	12814.4	1288.6	43.6036	1980-06-02	2955.25	2	0	0	0	0	0	0	0	2	5
1	1980-06-09	270	180	41	91	78	5764.98	7	2	7	20876.2	17405.2	2809.72	95.0755	1980-06-02	2955.25	7	0	0	0	0	0	0	0	7	5
1	1980-06-12	220	190	41	93	78	5902.23	15	2	10	21373.8	17819.4	2946.98	99.72	1980-06-02	2955.25	15	0	0	0	0	0	0	0	15	5
1	1980-06-16	250	190	41	93	80	6041.1	25	2	14	21877.2	18238.6	3085.85	104.419	1980-06-02	2955.25	25	0	0	0	0	0	0	0	25	5
1	1980-06-23	170	150	41	93	80	6041.1	25	3	21	21877.2	18238.6	3085.85	104.419	1980-06-02	2955.25	25	0	0	0	0	0	0	0	25	5
1	1980-06-02	200	150	42	61	50	2486.97	0	1	0	8993.44	7512.17	0	0	1980-06-02	2486.97	0	0	0	0	0	0	0	0	0	5
1	1980-06-05	190	150	42	70	59	3358.95	25	2	3	12154.4	10143.8	871.982	35.0621	1980-06-02	2486.97	0	0	25	0	0	0	0	0	25	5
1	1980-06-09	270	180	42	75	63	3843.99	40	2	7	13912.6	11607.7	1357.02	54.5654	1980-06-02	2486.97	10	0	30	0	0	0	0	0	40	5
1	1980-06-12	220	190	42	75	63	3843.99	60	2	10	13912.6	11607.7	1357.02	54.5654	1980-06-02	2486.97	10	0	30	0	0	0	10	10	40	5
1	1980-06-16	250	190	42	75	63	3843.99	100	2	14	13912.6	11607.7	1357.02	54.5654	1980-06-02	2486.97	10	0	30	0	0	0	30	30	40	5
1	1980-06-23	170	150	42	75	63	3843.99	100	3	21	13912.6	11607.7	1357.02	54.5654	1980-06-02	2486.97	10	0	30	0	0	0	30	30	40	5
1	1980-06-02	200	150	43	70	55	3153.87	0	1	0	11411	9524.89	0	0	1980-06-02	3153.87	0	0	0	0	0	0	0	0	0	5
1	1980-06-05	190	150	43	80	64	4185.52	1	2	3	15150.7	12638.4	1031.64	32.7104	1980-06-02	3153.87	1	0	0	0	0	0	0	0	1	5
1	1980-06-09	270	180	43	85	67	4663.49	5	2	7	16883.3	14080.9	1509.62	47.8656	1980-06-02	3153.87	5	0	0	0	0	0	0	0	5	5
1	1980-06-12	220	190	43	85	70	4849.39	15	2	10	17557.2	14642	1695.52	53.76	1980-06-02	3153.87	15	0	0	0	0	0	0	0	15	5
1	1980-06-16	250	190	43	86	72	5038.93	15	2	14	18244.3	15214	1885.06	59.7696	1980-06-02	3153.87	15	0	0	0	0	0	0	0	15	5
1	1980-06-23	170	150	43	87	72	5102.91	20	2	21	18476.2	15407.1	1949.04	61.7984	1980-06-02	3153.87	20	0	0	0	0	0	0	0	20	5
1	1980-06-26	170	150	43	87	72	5102.91	25	2	24	18476.2	15407.1	1949.04	61.7984	1980-06-02	3153.87	25	0	0	0	0	0	0	0	25	5
1	1980-06-30	180	150	43	87	74	5232.1	25	2	28	18944.5	15797	2078.22	65.8944	1980-06-02	3153.87	25	0	0	0	0	0	0	0	25	5
1	1980-07-03	180	150	43	87	74	5232.1	33	2	31	23187.7	15797	2078.22	65.8944	1980-06-02	3153.87	30	0	0	0	0	0	0	3	30	5
1	1980-07-07	200	160	43	87	74	5232.1	33	3	35	23187.7	15797	2078.22	65.8944	1980-06-02	3153.87	30	0	0	0	0	0	0	3	30	5
1	1980-06-02	200	150	44	81	69	4541.58	0	1	0	16441.4	13713	0	0	1980-06-02	4541.58	0	0	0	0	0	0	0	0	0	5
1	1980-06-05	190	150	44	84	71	4849.39	0	2	3	17557.2	14642	307.818	6.77778	1980-06-02	4541.58	0	0	0	0	0	0	0	0	0	5
1	1980-06-09	270	180	44	84	72	4912.17	3	2	7	17784.8	14831.4	370.593	8.16	1980-06-02	4541.58	3	0	0	0	0	0	0	0	3	5
1	1980-06-12	220	190	44	86	72	5038.93	5	2	10	18244.3	15214	497.353	10.9511	1980-06-02	4541.58	5	0	0	0	0	0	0	0	5	5
1	1980-06-16	250	190	44	86	72	5038.93	28	2	14	18244.3	15214	497.353	10.9511	1980-06-02	4541.58	10	0	0	0	0	0	3	15	10	5
1	1980-06-23	170	150	44	86	72	5038.93	28	3	21	18244.3	15214	497.353	10.9511	1980-06-02	4541.58	10	0	0	0	0	0	3	15	10	5
1	1980-06-02	200	150	45	80	65	4243.85	0	1	0	15362.1	12814.4	0	0	1980-06-02	4243.85	0	0	0	0	0	0	0	0	0	5
1	1980-06-05	190	150	45	82	66	4421.27	0	2	3	16005.3	13349.9	177.424	4.18074	1980-06-02	4243.85	0	0	0	0	0	0	0	0	0	5
1	1980-06-09	270	180	45	83	67	4541.58	5	2	7	16441.4	13713	297.726	7.01546	1980-06-02	4243.85	5	0	0	0	0	0	0	0	5	5
1	1980-06-12	220	190	45	83	67	4541.58	20	2	10	16441.4	13713	297.726	7.01546	1980-06-02	4243.85	20	0	0	0	0	0	0	0	20	5
1	1980-06-16	250	190	45	83	67	4541.58	72	2	14	16441.4	13713	297.726	7.01546	1980-06-02	4243.85	45	0	0	0	0	0	16	11	45	5
1	1980-06-23	170	150	45	83	67	4541.58	72	3	21	16441.4	13713	297.726	7.01546	1980-06-02	4243.85	45	0	0	0	0	0	16	11	45	5
1	1980-06-02	200	150	46	70	51	2955.25	0	1	0	10691	8925.46	0	0	1980-06-02	2955.25	0	0	0	0	0	0	0	0	0	5
1	1980-06-05	190	150	46	70	63	3570.49	1	2	3	12921.2	10782.2	615.232	20.8183	1980-06-02	2955.25	1	0	0	0	0	0	0	0	1	5
1	1980-06-09	270	180	46	70	63	3570.49	1	3	7	12921.2	10782.2	615.232	20.8183	1980-06-02	2955.25	1	0	0	0	0	0	0	0	1	5
1	1980-06-02	200	150	47	74	61	3678.68	0	1	0	13313.4	11108.8	0	0	1980-06-02	3678.68	0	0	0	0	0	0	0	0	0	5
1	1980-06-05	190	150	47	85	73	5038.93	1	2	3	18244.3	15214	1360.25	36.9767	1980-06-02	3678.68	1	0	0	0	0	0	0	0	1	5
1	1980-06-09	270	180	47	95	78	6041.1	5	2	7	21877.2	18238.6	2362.43	64.2195	1980-06-02	3678.68	5	0	0	0	0	0	0	0	5	5
1	1980-06-12	220	190	47	95	80	6181.59	5	2	10	22386.4	18662.5	2502.91	68.0384	1980-06-02	3678.68	5	0	0	0	0	0	0	0	5	5
1	1980-06-16	250	190	47	95	84	6467.41	10	2	14	23422.5	19525.1	2788.73	75.808	1980-06-02	3678.68	10	0	0	0	0	0	0	0	10	5
1	1980-06-23	170	150	47	95	84	6467.41	10	3	21	23422.5	19525.1	2788.73	75.808	1980-06-02	3678.68	10	0	0	0	0	0	0	0	10	5
1	1980-06-02	200	150	48	80	72	4663.49	1	1	0	16883.3	14080.9	0	0	1980-06-02	4663.49	1	0	0	0	0	0	0	0	1	5
1	1980-06-05	190	150	48	80	73	4725.06	2	2	3	17106.5	14266.7	61.5636	1.32012	1980-06-02	4663.49	1	0	0	0	1	0	0	0	1	5
1	1980-06-09	270	180	48	80	73	4725.06	5	2	7	17106.5	14266.7	61.5636	1.32012	1980-06-02	4663.49	2	0	1	0	1	0	0	1	3	5
1	1980-06-12	220	190	48	80	73	4725.06	7	2	10	17106.5	14266.7	61.5636	1.32012	1980-06-02	4663.49	4	0	1	0	1	0	0	1	5	6
1	1980-06-16	250	190	48	80	74	4787.02	26	2	14	17331.1	14453.7	123.531	2.64889	1980-06-02	4663.49	14	0	1	0	1	0	5	5	15	6
1	1980-06-23	170	150	48	80	74	4787.02	26	3	21	17331.1	14453.7	123.531	2.64889	1980-06-02	4663.49	14	0	1	0	1	0	5	5	15	6
1	1980-06-02	200	150	49	44	39	1390.53	0	1	0	5018.85	4203.12	0	0	1980-06-02	1390.53	0	0	0	0	0	0	0	0	0	6
1	1980-06-05	190	150	49	44	40	1424.24	0	2	3	5141.05	4304.86	33.7086	2.42415	1980-06-02	1390.53	0	0	0	0	0	0	0	0	0	6
1	1980-06-09	270	180	49	44	40	1424.24	5	2	7	5141.05	4304.86	33.7086	2.42415	1980-06-02	1390.53	5	0	0	0	0	0	0	0	5	6
1	1980-06-12	220	190	49	44	40	1424.24	85	2	10	5141.05	4304.86	33.7086	2.42415	1980-06-02	1390.53	5	0	0	0	0	0	80	0	5	6
1	1980-06-16	250	190	49	44	40	1424.24	85	3	14	5141.05	4304.86	33.7086	2.42415	1980-06-02	1390.53	5	0	0	0	0	0	80	0	5	6
1	1980-06-02	200	150	50	60	48	2354.35	0	1	0	8512.71	7111.94	0	0	1980-06-02	2354.35	0	0	0	0	0	0	0	0	0	6
1	1980-06-05	190	150	50	61	50	2486.97	1	2	3	8993.44	7512.17	132.614	5.63272	1980-06-02	2354.35	1	0	0	0	0	0	0	0	1	6
1	1980-06-09	270	180	50	67	56	3053.76	1	2	7	11048	9222.74	699.403	29.7068	1980-06-02	2354.35	1	0	0	0	0	0	0	0	1	6
1	1980-06-12	220	190	50	69	58	3255.6	3	2	10	11779.7	9831.92	901.25	38.2802	1980-06-02	2354.35	3	0	0	0	0	0	0	0	3	6
1	1980-06-16	250	190	50	70	59	3358.95	10	2	14	12154.4	10143.8	1004.6	42.6698	1980-06-02	2354.35	10	0	0	0	0	0	0	0	10	6
1	1980-06-23	170	150	50	70	59	3358.95	10	3	21	12154.4	10143.8	1004.6	42.6698	1980-06-02	2354.35	10	0	0	0	0	0	0	0	10	6
1	1980-06-02	200	150	51	67	59	3204.54	0	1	0	11594.6	9677.79	0	0	1980-06-02	3204.54	0	0	0	0	0	0	0	0	0	6
1	1980-06-05	190	150	51	68	60	3307.07	2	2	3	11966.3	9987.26	102.539	3.1998	1980-06-02	3204.54	2	0	0	0	0	0	0	0	2	6
1	1980-06-09	270	180	51	68	60	3307.07	10	2	7	11966.3	9987.26	102.539	3.1998	1980-06-02	3204.54	10	0	0	0	0	0	0	0	10	6
1	1980-06-12	220	190	51	68	60	3307.07	30	2	10	11966.3	9987.26	102.539	3.1998	1980-06-02	3204.54	20	0	0	0	0	0	10	0	20	6
1	1980-06-16	250	190	51	68	60	3307.07	30	3	14	11966.3	9987.26	102.539	3.1998	1980-06-02	3204.54	20	0	0	0	0	0	10	0	20	6
1	1980-06-02	200	150	52	70	59	3358.95	5	1	0	12154.4	10143.8	0	0	1980-06-02	3358.95	5	0	0	0	0	0	0	0	5	6
1	1980-06-05	190	150	52	71	60	3463.91	5	2	3	12534.9	10460.6	104.961	3.12481	1980-06-02	3358.95	5	0	0	0	0	0	0	0	5	6
1	1980-06-09	270	180	52	71	60	3463.91	80	2	7	12534.9	10460.6	104.961	3.12481	1980-06-02	3358.95	5	0	0	0	0	0	50	25	5	6
1	1980-06-12	220	190	52	71	60	3463.91	80	3	10	12534.9	10460.6	104.961	3.12481	1980-06-02	3358.95	5	0	0	0	0	0	50	25	5	6
1	1980-06-02	200	150	53	49	46	1821.68	25	1	0	6581.76	5504.33	0	0	1980-06-02	1821.68	5	0	20	0	0	0	0	0	25	6
1	1980-06-05	190	150	53	49	46	1821.68	25	2	3	6581.76	5504.33	0	0	1980-06-02	1821.68	5	0	20	0	0	0	0	0	25	6
1	1980-06-09	270	180	53	49	46	1821.68	25	3	7	6581.76	5504.33	0	0	1980-06-02	1821.68	5	0	20	0	0	0	0	0	25	6
1	1980-06-02	200	150	54	80	67	4361.73	0	1	0	15789.5	13170.2	0	0	1980-06-02	4361.73	0	0	0	0	0	0	0	0	0	6
1	1980-06-05	190	150	54	81	69	4541.58	0	2	3	16441.4	13713	179.846	4.12328	1980-06-02	4361.73	0	0	0	0	0	0	0	0	0	6
1	1980-06-09	270	180	54	82	69	4602.33	2	2	7	16661.6	13896.3	240.603	5.51622	1980-06-02	4361.73	2	0	0	0	0	0	0	0	2	6
1	1980-06-12	220	190	54	82	70	4663.49	10	2	10	16883.3	14080.9	301.762	6.91841	1980-06-02	4361.73	10	0	0	0	0	0	0	0	10	6
1	1980-06-16	250	190	54	83	70	4725.06	45	2	14	17106.5	14266.7	363.326	8.32986	1980-06-02	4361.73	20	0	0	0	0	0	5	20	20	6
1	1980-06-23	170	150	54	83	70	4725.06	45	3	21	17106.5	14266.7	363.326	8.32986	1980-06-02	4361.73	20	0	0	0	0	0	5	20	20	6
1	1980-06-02	200	150	55	75	61	3733.38	1	1	0	13511.7	11273.8	0	0	1980-06-02	3733.38	0	0	1	0	0	0	0	0	1	6
1	1980-06-05	190	150	55	81	66	4361.73	3	2	3	15789.5	13170.2	628.352	16.8307	1980-06-02	3733.38	2	0	1	0	0	0	0	0	3	6
1	1980-06-09	270	180	55	85	68	4725.06	10	2	7	17106.5	14266.7	991.678	26.5625	1980-06-02	3733.38	9	0	1	0	0	0	0	0	10	6
1	1980-06-12	220	190	55	86	68	4787.02	20	2	10	17331.1	14453.7	1053.65	28.2223	1980-06-02	3733.38	19	0	1	0	0	0	0	0	20	6
1	1980-06-16	250	190	55	88	70	5038.93	25	2	14	18244.3	15214	1305.55	34.9697	1980-06-02	3733.38	24	0	1	0	0	0	0	0	25	6
1	1980-06-23	170	150	55	88	70	5038.93	25	3	21	18244.3	15214	1305.55	34.9697	1980-06-02	3733.38	24	0	1	0	0	0	0	0	25	6
1	1980-06-02	200	150	56	68	66	3624.38	5	1	0	13116.6	10944.9	0	0	1980-06-02	3624.38	5	0	0	0	0	0	0	0	5	6
1	1980-06-05	190	150	56	68	67	3678.68	5	2	3	13313.4	11108.8	54.2971	1.49811	1980-06-02	3624.38	5	0	0	0	0	0	0	0	5	6
1	1980-06-09	270	180	56	68	67	3678.68	5	2	7	13313.4	11108.8	54.2971	1.49811	1980-06-02	3624.38	5	0	0	0	0	0	0	0	5	6
1	1980-06-12	220	190	56	68	68	3733.38	8	2	10	13511.7	11273.8	108.998	3.00735	1980-06-02	3624.38	8	0	0	0	0	0	0	0	8	6
1	1980-06-16	250	190	56	68	68	3733.38	100	2	14	13511.7	11273.8	108.998	3.00735	1980-06-02	3624.38	25	0	0	0	0	0	15	60	25	6
1	1980-06-23	170	150	56	68	68	3733.38	100	3	21	13511.7	11273.8	108.998	3.00735	1980-06-02	3624.38	25	0	0	0	0	0	15	60	25	6
1	1980-06-02	200	150	57	76	61	3788.48	0	1	0	13711.4	11440.1	0	0	1980-06-02	3788.48	0	0	0	0	0	0	0	0	0	6
1	1980-06-05	190	150	57	81	66	4361.73	2	2	3	15789.5	13170.2	573.248	15.1313	1980-06-02	3788.48	1	0	0	0	1	0	0	0	1	6
1	1980-06-09	270	180	57	87	70	4975.35	16	2	7	18013.8	15022.1	1186.87	31.3283	1980-06-02	3788.48	15	0	0	0	1	0	0	0	15	6
1	1980-06-12	220	190	57	87	70	4975.35	16	2	10	18013.8	15022.1	1186.87	31.3283	1980-06-02	3788.48	15	0	0	0	1	0	0	0	15	6
1	1980-06-16	250	190	57	87	70	4975.35	16	2	14	18013.8	15022.1	1186.87	31.3283	1980-06-02	3788.48	15	0	0	0	1	0	0	0	15	6
1	1980-06-23	170	150	57	87	70	4975.35	16	3	21	18013.8	15022.1	1186.87	31.3283	1980-06-02	3788.48	15	0	0	0	1	0	0	0	15	6
1	1980-06-02	200	150	58	70	55	3153.87	0	1	0	11411	9524.89	0	0	1980-06-02	3153.87	0	0	0	0	0	0	0	0	0	6
1	1980-06-05	190	150	58	85	69	4787.02	1	2	3	17331.1	14453.7	1633.15	51.7824	1980-06-02	3153.87	1	0	0	0	0	0	0	0	1	6
1	1980-06-09	270	180	58	91	75	5562.12	7	2	7	20140.9	16793	2408.25	76.3584	1980-06-02	3153.87	7	0	0	0	0	0	0	0	7	6
1	1980-06-12	220	190	58	93	75	5696.95	10	2	10	20629.6	17199.9	2543.08	80.6336	1980-06-02	3153.87	10	0	0	0	0	0	0	0	10	6
1	1980-06-16	250	190	58	94	77	5902.23	13	2	14	21373.8	17819.4	2748.36	87.1424	1980-06-02	3153.87	10	0	0	0	0	0	3	0	10	6
1	1980-06-23	170	150	58	94	77	5902.23	13	3	21	21373.8	17819.4	2748.36	87.1424	1980-06-02	3153.87	10	0	0	0	0	0	3	0	10	6
1	1980-06-02	200	150	59	70	65	3678.68	1	1	0	13313.4	11108.8	0	0	1980-06-02	3678.68	1	0	0	0	0	0	0	0	1	6
1	1980-06-05	190	150	59	71	65	3733.38	3	2	3	13511.7	11273.8	54.7008	1.48697	1980-06-02	3678.68	2	0	0	0	1	0	0	0	2	6
1	1980-06-09	270	180	59	71	55	3204.54	10	2	7	11594.6	9677.79	-474.14	-12.8889	1980-06-02	3678.68	9	0	0	0	1	0	0	0	9	6
1	1980-06-12	220	190	59	71	66	3788.48	46	2	10	13711.4	11440.1	109.805	2.98491	1980-06-02	3678.68	15	0	0	0	1	0	30	0	15	6
1	1980-06-16	250	190	59	71	66	3788.48	46	3	14	13711.4	11440.1	109.805	2.98491	1980-06-02	3678.68	15	0	0	0	1	0	30	0	15	6
1	1980-06-02	200	150	60	75	68	4127.59	0	1	0	14940.7	12463.6	0	0	1980-06-02	4127.59	0	0	0	0	0	0	0	0	0	7
1	1980-06-05	190	150	60	76	70	4302.59	1	2	3	15575.1	12991.7	175.002	4.23982	1980-06-02	4127.59	1	0	0	0	0	0	0	0	1	7
1	1980-06-09	270	180	60	76	70	4302.59	5	2	7	15575.1	12991.7	175.002	4.23982	1980-06-02	4127.59	5	0	0	0	0	0	0	0	5	7
1	1980-06-12	220	190	60	77	70	4361.73	10	2	10	15789.5	13170.2	234.143	5.67265	1980-06-02	4127.59	10	0	0	0	0	0	0	0	10	7
1	1980-06-16	250	190	60	77	70	4361.73	100	2	14	15789.5	13170.2	234.143	5.67265	1980-06-02	4127.59	10	0	0	0	0	0	15	75	10	7
1	1980-06-23	170	150	60	77	70	4361.73	100	3	21	15789.5	13170.2	234.143	5.67265	1980-06-02	4127.59	10	0	0	0	0	0	15	75	10	7
1	1980-06-02	200	150	61	75	60	3678.68	1	1	0	13313.4	11108.8	0	0	1980-06-02	3678.68	1	0	0	0	0	0	0	0	1	7
1	1980-06-05	190	150	61	87	71	5038.93	2	2	3	18244.3	15214	1360.25	36.9767	1980-06-02	3678.68	2	0	0	0	0	0	0	0	2	7
1	1980-06-09	270	180	61	92	76	5696.95	10	2	7	20629.6	17199.9	2018.28	54.8642	1980-06-02	3678.68	10	0	0	0	0	0	0	0	10	7
1	1980-06-12	220	190	61	92	77	5764.98	10	2	10	20876.2	17405.2	2086.3	56.7133	1980-06-02	3678.68	10	0	0	0	0	0	0	0	10	7
1	1980-06-16	250	190	61	92	78	5833.4	15	2	14	21124.3	17611.7	2154.73	58.5734	1980-06-02	3678.68	15	0	0	0	0	0	0	0	15	7
1	1980-06-23	170	150	61	92	78	5833.4	15	3	21	21124.3	17611.7	2154.73	58.5734	1980-06-02	3678.68	15	0	0	0	0	0	0	0	15	7
1	1980-06-02	200	150	62	91	73	5428.9	0	1	0	19657.9	16390.9	0	0	1980-06-02	5428.9	0	0	0	0	0	0	0	0	0	7
1	1980-06-05	190	150	62	99	78	6323.69	1	2	3	22901.6	19091.4	894.791	16.482	1980-06-02	5428.9	1	0	0	0	0	0	0	0	1	7
1	1980-06-09	270	180	62	105	85	7286.71	3	2	7	26392.5	21997.8	1857.81	34.2207	1980-06-02	5428.9	3	0	0	0	0	0	0	0	3	7
1	1980-06-12	220	190	62	105	85	7286.71	7	2	10	26392.5	21997.8	1857.81	34.2207	1980-06-02	5428.9	7	0	0	0	0	0	0	0	7	7
1	1980-06-16	250	190	62	105	86	7363.61	10	2	14	26671.3	22229.9	1934.71	35.6373	1980-06-02	5428.9	10	0	0	0	0	0	0	0	10	7
1	1980-06-23	170	150	62	106	86	7440.92	15	2	21	26951.5	22463.2	2012.02	37.0613	1980-06-02	5428.9	15	0	0	0	0	0	0	0	15	7
1	1980-06-26	170	150	62	106	86	7440.92	100	2	24	26951.5	22463.2	2012.02	37.0613	1980-06-02	5428.9	15	0	0	0	0	0	77	8	15	7
1	1980-06-30	180	150	62	106	86	7440.92	100	3	28	26951.5	22463.2	2012.02	37.0613	1980-06-02	5428.9	15	0	0	0	0	0	77	8	15	7
1	1980-06-02	200	150	63	79	65	4185.52	0	1	0	15150.7	12638.4	0	0	1980-06-02	4185.52	0	0	0	0	0	0	0	0	0	7
1	1980-06-05	190	150	63	83	69	4663.49	3	2	3	16883.3	14080.9	477.976	11.4198	1980-06-02	4185.52	3	0	0	0	0	0	0	0	3	7
1	1980-06-09	270	180	63	87	72	5102.91	5	2	7	18476.2	15407.1	917.398	21.9184	1980-06-02	4185.52	5	0	0	0	0	0	0	0	5	7
1	1980-06-12	220	190	63	89	75	5428.9	7	2	10	19657.9	16390.9	1243.38	29.7068	1980-06-02	4185.52	7	0	0	0	0	0	0	0	7	7
1	1980-06-16	250	190	63	89	75	5428.9	10	2	14	19657.9	16390.9	1243.38	29.7068	1980-06-02	4185.52	10	0	0	0	0	0	0	0	10	7
1	1980-06-23	170	150	63	89	75	5428.9	10	3	21	19657.9	16390.9	1243.38	29.7068	1980-06-02	4185.52	10	0	0	0	0	0	0	0	10	7
1	1980-06-02	200	150	64	103	85	7134.11	0	1	0	25839.3	21537.2	0	0	1980-06-02	7134.11	0	0	0	0	0	0	0	0	0	7
1	1980-06-05	190	150	64	103	85	7134.11	1	2	3	25839.3	21537.2	0	0	1980-06-02	7134.11	1	0	0	0	0	0	0	0	1	7
1	1980-06-09	270	180	64	103	86	7210.21	3	2	7	26115.2	21766.9	76.0966	1.06666	1980-06-02	7134.11	3	0	0	0	0	0	0	0	3	7
1	1980-06-12	220	190	64	103	87	7286.71	25	2	10	26392.5	21997.8	152.597	2.13898	1980-06-02	7134.11	25	0	0	0	0	0	0	0	25	7
1	1980-06-16	250	190	64	103	87	7286.71	55	2	14	26392.5	21997.8	152.597	2.13898	1980-06-02	7134.11	45	0	0	0	0	0	5	5	45	7
1	1980-06-23	170	150	64	103	87	7286.71	55	3	21	26392.5	21997.8	152.597	2.13898	1980-06-02	7134.11	45	0	0	0	0	0	5	5	45	7
1	1980-06-02	200	150	65	45	44	1598.84	0	1	0	5773.97	4831.79	0	0	1980-06-02	1598.84	0	0	0	0	0	0	0	0	0	7
1	1980-06-05	190	150	65	45	44	1598.84	1	2	3	5773.97	4831.79	0	0	1980-06-02	1598.84	1	0	0	0	0	0	0	0	1	7
1	1980-06-09	270	180	65	45	45	1634.97	100	2	7	5904.94	4940.84	36.1308	2.25982	1980-06-02	1598.84	1	0	0	0	0	0	69	30	1	7
1	1980-06-12	220	190	65	45	45	1634.97	100	3	10	5904.94	4940.84	36.1308	2.25982	1980-06-02	1598.84	1	0	0	0	0	0	69	30	1	7
1	1980-06-02	200	150	66	55	47	2100.02	0	1	0	7590.77	6344.38	0	0	1980-06-02	2100.02	0	0	0	0	0	0	0	0	0	7
1	1980-06-05	190	150	66	56	48	2183.19	2	2	3	7892.23	6595.36	83.1613	3.96002	1980-06-02	2100.02	2	0	0	0	0	0	0	0	2	7
1	1980-06-09	270	180	66	56	48	2183.19	5	2	7	7892.23	6595.36	83.1613	3.96002	1980-06-02	2100.02	5	0	0	0	0	0	0	0	5	7
1	1980-06-12	220	190	66	58	48	2267.96	10	2	10	8199.55	6851.21	167.937	7.99692	1980-06-02	2100.02	10	0	0	0	0	0	0	0	10	7
1	1980-06-16	250	190	66	58	50	2354.35	100	2	14	8512.71	7111.94	254.328	12.1107	1980-06-02	2100.02	10	0	0	0	0	0	15	75	10	7
1	1980-06-23	170	150	66	58	50	2354.35	100	3	21	8512.71	7111.94	254.328	12.1107	1980-06-02	2100.02	10	0	0	0	0	0	15	75	10	7
1	1980-06-02	200	150	67	61	53	2623.21	0	1	0	9487.34	7923.37	0	0	1980-06-02	2623.21	0	0	0	0	0	0	0	0	0	7
1	1980-06-05	190	150	67	61	53	2623.21	2	2	3	9487.34	7923.37	0	0	1980-06-02	2623.21	1	1	0	0	0	0	0	0	2	7
1	1980-06-09	270	180	67	61	53	2623.21	3	2	7	9487.34	7923.37	0	0	1980-06-02	2623.21	2	1	0	0	0	0	0	0	3	7
1	1980-06-12	220	190	67	61	53	2623.21	100	2	10	9487.34	7923.37	0	0	1980-06-02	2623.21	14	1	0	0	0	0	5	80	15	7
1	1980-06-16	250	190	67	61	53	2623.21	100	3	14	9487.34	7923.37	0	0	1980-06-02	2623.21	14	1	0	0	0	0	5	80	15	7
1	1980-06-02	200	150	68	104	86	7286.71	0	1	0	26392.5	21997.8	0	0	1980-06-02	7286.71	0	0	0	0	0	0	0	0	0	7
1	1980-06-05	190	150	68	107	88	7675.26	0	2	3	27801	23170.4	388.557	5.33241	1980-06-02	7286.71	0	0	0	0	0	0	0	0	0	7
1	1980-06-09	270	180	68	109	90	7993.37	3	2	7	28954.2	24130.5	706.669	9.69806	1980-06-02	7286.71	3	0	0	0	0	0	0	0	3	7
1	1980-06-12	220	190	68	110	90	8073.91	6	2	10	29246.1	24373.6	787.206	10.8033	1980-06-02	7286.71	6	0	0	0	0	0	0	0	6	7
1	1980-06-16	250	190	68	110	90	8073.91	20	2	14	29246.1	24373.6	787.206	10.8033	1980-06-02	7286.71	15	0	0	0	0	0	5	0	15	7
1	1980-06-23	170	150	68	110	90	8073.91	20	3	21	29246.1	24373.6	787.206	10.8033	1980-06-02	7286.71	15	0	0	0	0	0	5	0	15	7
1	1980-06-02	200	150	69	83	68	4602.33	0	1	0	16661.6	13896.3	0	0	1980-06-02	4602.33	0	0	0	0	0	0	0	0	0	7
1	1980-06-05	190	150	69	88	74	5297.29	0	2	3	19180.9	15993.7	694.962	15.1002	1980-06-02	4602.33	0	0	0	0	0	0	0	0	0	7
1	1980-06-09	270	180	69	91	76	5629.33	5	2	7	20384.5	16995.8	1027	22.3148	1980-06-02	4602.33	5	0	0	0	0	0	0	0	5	7
1	1980-06-12	220	190	69	91	76	5629.33	5	2	10	20384.5	16995.8	1027	22.3148	1980-06-02	4602.33	5	0	0	0	0	0	0	0	5	7
1	1980-06-16	250	190	69	92	79	5902.23	10	2	14	21373.8	17819.4	1299.9	28.2444	1980-06-02	4602.33	10	0	0	0	0	0	0	0	10	7
1	1980-06-23	170	150	69	92	79	5902.23	10	3	21	21373.8	17819.4	1299.9	28.2444	1980-06-02	4602.33	10	0	0	0	0	0	0	0	10	7
1	1980-06-05	190	150	70	43	34	1196.76	0	1	0	4316.42	3618.31	0	0	1980-06-05	1196.76	0	0	0	0	0	0	0	0	0	7
1	1980-06-09	270	180	70	46	37	1390.53	5	2	4	5018.85	4203.12	193.774	16.1916	1980-06-05	1196.76	5	0	0	0	0	0	0	0	5	7
1	1980-06-12	220	190	70	46	37	1390.53	40	2	7	5018.85	4203.12	193.774	16.1916	1980-06-05	1196.76	40	0	0	0	0	0	0	0	40	8
1	1980-06-16	250	190	70	46	37	1390.53	40	3	11	5018.85	4203.12	193.774	16.1916	1980-06-05	1196.76	40	0	0	0	0	0	0	0	40	8
1	1980-06-05	190	150	71	44	37	1324.32	2	1	0	4778.86	4003.31	0	0	1980-06-05	1324.32	1	1	0	0	0	0	0	0	2	8
1	1980-06-09	270	180	71	49	39	1563.11	2	2	4	5644.46	4723.97	238.786	18.0308	1980-06-05	1324.32	1	1	0	0	0	0	0	0	2	8
1	1980-06-12	220	190	71	49	40	1598.84	100	2	7	5773.97	4831.79	274.513	20.7285	1980-06-05	1324.32	1	1	0	0	0	0	68	30	2	8
1	1980-06-16	250	190	71	49	40	1598.84	100	3	11	5773.97	4831.79	274.513	20.7285	1980-06-05	1324.32	1	1	0	0	0	0	68	30	2	8
1	1980-06-05	190	150	72	70	59	3358.95	0	1	0	12154.4	10143.8	0	0	1980-06-05	3358.95	0	0	0	0	0	0	0	0	0	8
1	1980-06-09	270	180	72	76	65	4012.94	3	2	4	14525.1	12117.5	653.987	19.47	1980-06-05	3358.95	3	0	0	0	0	0	0	0	3	8
1	1980-06-12	220	190	72	78	66	4185.52	20	2	7	15150.7	12638.4	826.567	24.6079	1980-06-05	3358.95	20	0	0	0	0	0	0	0	20	8
1	1980-06-16	250	190	72	78	66	4185.52	25	2	11	15150.7	12638.4	826.567	24.6079	1980-06-05	3358.95	25	0	0	0	0	0	0	0	25	8
1	1980-06-23	170	150	72	78	66	4185.52	25	3	18	15150.7	12638.4	826.567	24.6079	1980-06-05	3358.95	25	0	0	0	0	0	0	0	25	8
1	1980-06-05	190	150	73	75	58	3570.49	1	1	0	12921.2	10782.2	0	0	1980-06-05	3570.49	0	1	0	0	0	0	0	0	1	8
1	1980-06-09	270	180	73	101	81	6686.01	2	2	4	24215	20184.9	3115.52	87.2576	1980-06-05	3570.49	1	1	0	0	0	0	0	0	2	8
1	1980-06-12	220	190	73	105	84	7210.21	5	2	7	26115.2	21766.9	3639.72	101.939	1980-06-05	3570.49	4	1	0	0	0	0	0	0	5	8
1	1980-06-16	250	190	73	106	84	7286.71	10	2	11	26392.5	21997.8	3716.22	104.082	1980-06-05	3570.49	9	1	0	0	0	0	0	0	10	8
1	1980-06-23	170	150	73	106	84	7286.71	38	2	18	26392.5	21997.8	3716.22	104.082	1980-06-05	3570.49	34	1	0	0	0	0	0	3	35	8
1	1980-06-26	170	150	73	106	84	7286.71	48	2	21	26392.5	21997.8	3716.22	104.082	1980-06-05	3570.49	34	1	0	0	0	0	10	3	35	8
1	1980-06-30	180	150	73	106	84	7286.71	38	2	25	26392.5	21997.8	3716.22	104.082	1980-06-05	3570.49	34	1	0	0	0	0	2	1	35	8
1	1980-07-03	180	150	73	106	84	7286.71	45	2	28	32308.2	21997.8	3716.22	104.082	1980-06-05	3570.49	34	1	0	0	0	0	5	5	35	8
1	1980-07-07	200	160	73	106	84	7286.71	66	2	32	32308.2	21997.8	3716.22	104.082	1980-06-05	3570.49	34	1	0	0	0	0	1	30	35	8
1	1980-07-11	180	160	73	106	84	7286.71	66	3	36	32308.2	21997.8	3716.22	104.082	1980-06-05	3570.49	34	1	0	0	0	0	1	30	35	8
1	1980-06-05	190	150	74	73	63	3733.38	3	1	0	13511.7	11273.8	0	0	1980-06-05	3733.38	3	0	0	0	0	0	0	0	3	8
1	1980-06-09	270	180	74	87	73	5167.3	5	2	4	18709.7	15601.4	1433.93	38.4083	1980-06-05	3733.38	5	0	0	0	0	0	0	0	5	8
1	1980-06-12	220	190	74	87	76	5362.89	10	2	7	19418.7	16191.7	1629.52	43.6473	1980-06-05	3733.38	10	0	0	0	0	0	0	0	10	8
1	1980-06-16	250	190	74	87	78	5495.31	20	2	11	19898.7	16591.3	1761.93	47.194	1980-06-05	3733.38	20	0	0	0	0	0	0	0	20	8
1	1980-06-23	170	150	74	87	78	5495.31	20	3	18	19898.7	16591.3	1761.93	47.194	1980-06-05	3733.38	20	0	0	0	0	0	0	0	20	8
1	1980-06-05	190	150	75	108	87	7675.26	1	1	0	27801	23170.4	0	0	1980-06-05	7675.26	1	0	0	0	0	0	0	0	1	8
1	1980-06-09	270	180	75	110	88	7913.24	10	2	4	28663.7	23888.7	237.979	3.10059	1980-06-05	7675.26	10	0	0	0	0	0	0	0	10	8
1	1980-06-12	220	190	75	110	89	7993.37	20	2	7	28954.2	24130.5	318.112	4.14464	1980-06-05	7675.26	20	0	0	0	0	0	0	0	20	8
1	1980-06-16	250	190	75	110	90	8073.91	40	2	11	29246.1	24373.6	398.649	5.19395	1980-06-05	7675.26	30	0	0	0	0	0	10	0	30	8
1	1980-06-23	170	150	75	110	90	8073.91	40	3	18	29246.1	24373.6	398.649	5.19395	1980-06-05	7675.26	30	0	0	0	0	0	10	0	30	8
1	1980-06-05	190	150	76	60	44	2183.19	50	1	0	7892.23	6595.36	0	0	1980-06-05	2183.19	50	0	0	0	0	0	0	0	50	8
1	1980-06-09	270	180	76	60	44	2183.19	50	3	4	7892.23	6595.36	0	0	1980-06-05	2183.19	50	0	0	0	0	0	0	0	50	8
1	1980-06-05	190	150	77	56	42	1938.55	0	1	0	7005.42	5857.04	0	0	1980-06-05	1938.55	0	0	0	0	0	0	0	0	0	8
1	1980-06-09	270	180	77	59	44	2141.4	10	2	4	7740.77	6469.26	202.857	10.4644	1980-06-05	1938.55	10	0	0	0	0	0	0	0	10	8
1	1980-06-12	220	190	77	59	45	2183.19	50	2	7	7892.23	6595.36	244.64	12.6197	1980-06-05	1938.55	10	0	0	0	0	0	40	0	10	8
1	1980-06-16	250	190	77	59	45	2183.19	50	3	11	7892.23	6595.36	244.64	12.6197	1980-06-05	1938.55	10	0	0	0	0	0	40	0	10	8
1	1980-06-09	270	180	78	66	66	3517	0	1	0	12727.3	10620.8	0	0	1980-06-09	3517	0	0	0	0	0	0	0	0	0	8
1	1980-06-12	220	190	78	76	66	4070.06	3	2	3	14732.1	12289.9	553.063	15.7254	1980-06-09	3517	3	0	0	0	0	0	0	0	3	8
1	1980-06-16	250	190	78	81	71	4663.49	5	2	7	16883.3	14080.9	1146.5	32.5987	1980-06-09	3517	5	0	0	0	0	0	0	0	5	8
1	1980-06-23	170	150	78	81	71	4663.49	5	3	14	16883.3	14080.9	1146.5	32.5987	1980-06-09	3517	5	0	0	0	0	0	0	0	5	8
1	1980-06-09	270	180	79	76	63	3899.9	5	1	0	14115.3	11776.4	0	0	1980-06-09	3899.9	5	0	0	0	0	0	0	0	5	8
1	1980-06-12	220	190	79	76	65	4012.94	15	2	3	14525.1	12117.5	113.035	2.8984	1980-06-09	3899.9	15	0	0	0	0	0	0	0	15	8
1	1980-06-16	250	190	79	76	65	4012.94	30	2	7	14525.1	12117.5	113.035	2.8984	1980-06-09	3899.9	30	0	0	0	0	0	0	0	30	8
1	1980-06-23	170	150	79	76	65	4012.94	30	3	14	14525.1	12117.5	113.035	2.8984	1980-06-09	3899.9	30	0	0	0	0	0	0	0	30	8
1	1980-06-09	270	180	80	55	47	2100.02	5	1	0	7590.77	6344.38	0	0	1980-06-09	2100.02	0	0	5	0	0	0	0	0	5	8
1	1980-06-12	220	190	80	67	56	3053.76	8	2	3	11048	9222.74	953.731	45.4152	1980-06-09	2100.02	3	0	5	0	0	0	0	0	8	8
1	1980-06-16	250	190	80	71	63	3624.38	20	2	7	13116.6	10944.9	1524.35	72.5875	1980-06-09	2100.02	15	0	5	0	0	0	0	0	20	8
1	1980-06-23	170	150	80	71	63	3624.38	20	3	14	13116.6	10944.9	1524.35	72.5875	1980-06-09	2100.02	15	0	5	0	0	0	0	0	20	8
1	1980-06-09	270	180	81	60	52	2531.98	0	1	0	9156.61	7648.02	0	0	1980-06-09	2531.98	0	0	0	0	0	0	0	0	0	8
1	1980-06-12	220	190	81	74	66	3956.22	1	2	3	14319.5	11946.4	1424.24	56.25	1980-06-09	2531.98	1	0	0	0	0	0	0	0	1	8
1	1980-06-16	250	190	81	81	72	4725.06	1	2	7	17106.5	14266.7	2193.08	86.6151	1980-06-09	2531.98	1	0	0	0	0	0	0	0	1	8
1	1980-06-23	170	150	81	81	72	4725.06	1	3	14	17106.5	14266.7	2193.08	86.6151	1980-06-09	2531.98	1	0	0	0	0	0	0	0	1	8
1	1980-06-09	270	180	82	61	53	2623.21	1	1	0	9487.34	7923.37	0	0	1980-06-09	2623.21	1	0	0	0	0	0	0	0	1	8
1	1980-06-12	220	190	82	62	56	2810.53	10	2	3	10166.4	8488.68	187.315	7.14066	1980-06-09	2623.21	10	0	0	0	0	0	0	0	10	8
1	1980-06-16	250	190	82	62	56	2810.53	10	3	7	10166.4	8488.68	187.315	7.14066	1980-06-09	2623.21	10	0	0	0	0	0	0	0	10	8
1	1980-06-09	270	180	83	79	65	4185.52	2	1	0	15150.7	12638.4	0	0	1980-06-09	4185.52	2	0	0	0	0	0	0	0	2	8
1	1980-06-12	220	190	83	84	70	4787.02	3	2	3	17331.1	14453.7	601.506	14.3711	1980-06-09	4185.52	3	0	0	0	0	0	0	0	3	8
1	1980-06-16	250	190	83	84	71	4849.39	10	2	7	17557.2	14642	663.877	15.8613	1980-06-09	4185.52	10	0	0	0	0	0	0	0	10	8
1	1980-06-23	170	150	83	84	71	4849.39	10	3	14	17557.2	14642	663.877	15.8613	1980-06-09	4185.52	10	0	0	0	0	0	0	0	10	8
1	1980-06-09	270	180	84	53	44	1899.19	2	1	0	6862.73	5738.25	0	0	1980-06-09	1899.19	2	0	0	0	0	0	0	0	2	8
1	1980-06-12	220	190	84	56	48	2183.19	3	2	3	7892.23	6595.36	284	14.9538	1980-06-09	1899.19	3	0	0	0	0	0	0	0	3	9
1	1980-06-16	250	190	84	56	49	2225.37	5	2	7	8045.16	6722.68	326.186	17.175	1980-06-09	1899.19	5	0	0	0	0	0	0	0	5	9
1	1980-06-23	170	150	84	56	49	2225.37	5	3	14	8045.16	6722.68	326.186	17.175	1980-06-09	1899.19	5	0	0	0	0	0	0	0	5	9
1	1980-06-09	270	180	85	74	60	3624.38	2	1	0	13116.6	10944.9	0	0	1980-06-09	3624.38	2	0	0	0	0	0	0	0	2	9
1	1980-06-12	220	190	85	78	65	4127.59	12	2	3	14940.7	12463.6	503.207	13.8839	1980-06-09	3624.38	12	0	0	0	0	0	0	0	12	9
1	1980-06-16	250	190	85	78	69	4361.73	15	2	7	15789.5	13170.2	737.35	20.3442	1980-06-09	3624.38	15	0	0	0	0	0	0	0	15	9
1	1980-06-23	170	150	85	78	69	4361.73	15	3	14	15789.5	13170.2	737.35	20.3442	1980-06-09	3624.38	15	0	0	0	0	0	0	0	15	9
1	1980-06-09	270	180	86	68	59	3255.6	0	1	0	11779.7	9831.92	0	0	1980-06-09	3255.6	0	0	0	0	0	0	0	0	0	9
1	1980-06-12	220	190	86	70	62	3517	1	2	3	12727.3	10620.8	261.393	8.02902	1980-06-09	3255.6	1	0	0	0	0	0	0	0	1	9
1	1980-06-16	250	190	86	72	65	3788.48	5	2	7	13711.4	11440.1	532.878	16.368	1980-06-09	3255.6	5	0	0	0	0	0	0	0	5	9
1	1980-06-23	170	150	86	72	65	3788.48	5	3	14	13711.4	11440.1	532.878	16.368	1980-06-09	3255.6	5	0	0	0	0	0	0	0	5	9
1	1980-06-09	270	180	87	53	44	1899.19	2	1	0	6862.73	5738.25	0	0	1980-06-09	1899.19	2	0	0	0	0	0	0	0	2	9
1	1980-06-12	220	190	87	56	47	2141.4	8	2	3	7740.77	6469.26	242.217	12.7537	1980-06-09	1899.19	8	0	0	0	0	0	0	0	8	9
1	1980-06-16	250	190	87	56	47	2141.4	100	2	7	7740.77	6469.26	242.217	12.7537	1980-06-09	1899.19	20	0	0	0	0	0	50	30	20	9
1	1980-06-23	170	150	87	56	47	2141.4	100	3	14	7740.77	6469.26	242.217	12.7537	1980-06-09	1899.19	20	0	0	0	0	0	50	30	20	9
1	1980-06-09	270	180	88	50	42	1708.44	0	1	0	6171.28	5162.58	0	0	1980-06-09	1708.44	0	0	0	0	0	0	0	0	0	9
1	1980-06-12	220	190	88	53	49	2100.02	3	2	3	7590.77	6344.38	391.585	22.9206	1980-06-09	1708.44	3	0	0	0	0	0	0	0	3	9
1	1980-06-16	250	190	88	63	52	2669.44	5	2	7	9654.89	8062.87	960.997	56.25	1980-06-09	1708.44	5	0	0	0	0	0	0	0	5	9
1	1980-06-23	170	150	88	63	52	2669.44	5	3	14	9654.89	8062.87	960.997	56.25	1980-06-09	1708.44	5	0	0	0	0	0	0	0	5	9
1	1980-06-09	270	180	89	60	49	2398.15	1	1	0	8671.49	7244.13	0	0	1980-06-09	2398.15	1	0	0	0	0	0	0	0	1	9
1	1980-06-12	220	190	89	72	59	3463.91	5	2	3	12534.9	10460.6	1065.76	44.4407	1980-06-09	2398.15	5	0	0	0	0	0	0	0	5	9
1	1980-06-16	250	190	89	80	66	4302.59	10	2	7	15575.1	12991.7	1904.43	79.4125	1980-06-09	2398.15	10	0	0	0	0	0	0	0	10	9
1	1980-06-23	170	150	89	83	70	4725.06	25	2	14	17106.5	14266.7	2326.9	97.0289	1980-06-09	2398.15	20	0	0	0	0	0	5	0	20	9
1	1980-06-26	170	150	89	83	70	4725.06	45	2	17	17106.5	14266.7	2326.9	97.0289	1980-06-09	2398.15	20	0	0	0	0	0	5	20	20	9
1	1980-06-30	180	150	89	83	70	4725.06	45	3	21	17106.5	14266.7	2326.9	97.0289	1980-06-09	2398.15	20	0	0	0	0	0	5	20	20	9
1	1980-06-09	270	180	90	86	72	5038.93	5	1	0	18244.3	15214	0	0	1980-06-09	5038.93	5	0	0	0	0	0	0	0	5	9
1	1980-06-12	220	190	90	91	72	5362.89	10	2	3	19418.7	16191.7	323.966	6.42926	1980-06-09	5038.93	10	0	0	0	0	0	0	0	10	9
1	1980-06-16	250	190	90	94	74	5696.95	15	2	7	20629.6	17199.9	658.024	13.0588	1980-06-09	5038.93	15	0	0	0	0	0	0	0	15	9
1	1980-06-23	170	150	90	95	74	5764.98	15	2	14	20876.2	17405.2	726.047	14.4087	1980-06-09	5038.93	15	0	0	0	0	0	0	0	15	9
1	1980-06-26	170	150	90	95	80	6181.59	25	2	17	22386.4	18662.5	1142.66	22.6767	1980-06-09	5038.93	15	0	0	0	0	0	10	0	15	9
1	1980-06-30	180	150	90	95	80	6181.59	25	2	21	22386.4	18662.5	1142.66	22.6767	1980-06-09	5038.93	15	0	0	0	0	0	5	5	15	9
1	1980-07-03	180	150	90	96	80	6252.44	25	2	24	27717	18876.4	1213.51	24.0827	1980-06-09	5038.93	15	0	0	0	0	0	2	8	15	9
1	1980-07-07	200	160	90	96	80	6252.44	31	2	28	27717	18876.4	1213.51	24.0827	1980-06-09	5038.93	15	0	0	0	0	0	8	8	15	9
1	1980-07-11	180	160	90	96	80	6252.44	31	3	32	27717	18876.4	1213.51	24.0827	1980-06-09	5038.93	15	0	0	0	0	0	8	8	15	9
1	1980-06-09	270	180	91	75	61	3733.38	1	1	0	13511.7	11273.8	0	0	1980-06-09	3733.38	1	0	0	0	0	0	0	0	1	9
1	1980-06-12	220	190	91	86	75	5232.1	3	2	3	18944.5	15797	1498.72	40.1438	1980-06-09	3733.38	3	0	0	0	0	0	0	0	3	9
1	1980-06-16	250	190	91	90	80	5833.4	10	2	7	21124.3	17611.7	2100.02	56.25	1980-06-09	3733.38	10	0	0	0	0	0	0	0	10	9
1	1980-06-23	170	150	91	92	80	5971.47	12	2	14	21624.7	18028.4	2238.09	59.9481	1980-06-09	3733.38	12	0	0	0	0	0	0	0	12	9
1	1980-06-26	170	150	91	93	82	6181.59	12	2	17	22386.4	18662.5	2448.21	65.5763	1980-06-09	3733.38	12	0	0	0	0	0	0	0	12	9
1	1980-06-30	180	150	91	94	84	6395.35	25	2	21	23161.3	19307.7	2661.97	71.3019	1980-06-09	3733.38	15	0	0	0	0	0	10	0	15	9
1	1980-07-03	180	150	91	97	88	6908.24	35	2	24	30628.2	20855.6	3174.86	85.04	1980-06-09	3733.38	15	0	0	0	0	0	20	0	15	9
1	1980-07-07	200	160	91	99	88	7058.42	35	2	28	31294.8	21308.8	3325.04	89.0625	1980-06-09	3733.38	15	0	0	0	0	0	5	15	15	9
1	1980-07-11	180	160	91	99	88	7058.42	50	2	32	31294.8	21308.8	3325.04	89.0625	1980-06-09	3733.38	15	0	0	0	0	0	10	25	15	9
1	1980-07-15	170	150	91	99	88	7058.42	85	2	36	31294.8	21308.8	3325.04	89.0625	1980-06-09	3733.38	15	0	0	0	0	0	0	70	15	9
1	1980-07-18	180	150	91	99	88	7058.42	85	3	39	31294.8	21308.8	3325.04	89.0625	1980-06-09	3733.38	15	0	0	0	0	0	0	70	15	9
1	1980-06-09	270	180	92	89	77	5562.12	5	1	0	20140.9	16793	0	0	1980-06-09	5562.12	5	0	0	0	0	0	0	0	5	9
1	1980-06-12	220	190	92	90	79	5764.98	7	2	3	20876.2	17405.2	202.857	3.64712	1980-06-09	5562.12	7	0	0	0	0	0	0	0	7	9
1	1980-06-16	250	190	92	92	79	5902.23	25	2	7	21373.8	17819.4	340.114	6.11482	1980-06-09	5562.12	25	0	0	0	0	0	0	0	25	9
1	1980-06-23	170	150	92	92	79	5902.23	25	3	14	21373.8	17819.4	340.114	6.11482	1980-06-09	5562.12	25	0	0	0	0	0	0	0	25	9
1	1980-06-09	270	180	93	69	57	3204.54	0	1	0	11594.6	9677.79	0	0	1980-06-09	3204.54	0	0	0	0	0	0	0	0	0	9
1	1980-06-12	220	190	93	77	65	4070.06	5	2	3	14732.1	12289.9	865.523	27.0093	1980-06-09	3204.54	5	0	0	0	0	0	0	0	5	9
1	1980-06-16	250	190	93	82	70	4663.49	8	2	7	16883.3	14080.9	1458.96	45.5278	1980-06-09	3204.54	8	0	0	0	0	0	0	0	8	9
1	1980-06-23	170	150	93	82	70	4663.49	8	3	14	16883.3	14080.9	1458.96	45.5278	1980-06-09	3204.54	8	0	0	0	0	0	0	0	8	9
1	1980-06-09	270	180	94	71	59	3411.23	1	1	0	12343.9	10301.6	0	0	1980-06-09	3411.23	1	0	0	0	0	0	0	0	1	9
1	1980-06-12	220	190	94	72	61	3570.49	3	2	3	12921.2	10782.2	159.258	4.66864	1980-06-09	3411.23	3	0	0	0	0	0	0	0	3	9
1	1980-06-16	250	190	94	72	62	3624.38	65	2	7	13116.6	10944.9	213.151	6.24852	1980-06-09	3411.23	25	0	0	0	0	0	30	10	25	9
1	1980-06-23	170	150	94	72	62	3624.38	65	3	14	13116.6	10944.9	213.151	6.24852	1980-06-09	3411.23	25	0	0	0	0	0	30	10	25	9
1	1980-06-09	270	180	95	80	62	4070.06	2	1	0	14732.1	12289.9	0	0	1980-06-09	4070.06	0	0	2	0	0	0	0	0	2	9
1	1980-06-12	220	190	95	83	68	4602.33	5	2	3	16661.6	13896.3	532.273	13.0778	1980-06-09	4070.06	3	0	2	0	0	0	0	0	5	9
1	1980-06-16	250	190	95	83	68	4602.33	5	3	7	16661.6	13896.3	532.273	13.0778	1980-06-09	4070.06	3	0	2	0	0	0	0	0	5	9
1	1980-06-09	270	180	96	64	53	2763.09	0	1	0	9994.4	8345.53	0	0	1980-06-09	2763.09	0	0	0	0	0	0	0	0	0	9
1	1980-06-12	220	190	96	71	60	3463.91	1	2	3	12534.9	10460.6	700.816	25.3634	1980-06-09	2763.09	1	0	0	0	0	0	0	0	1	10
1	1980-06-16	250	190	96	77	54	3463.91	1	2	7	12534.9	10460.6	700.816	25.3634	1980-06-09	2763.09	1	0	0	0	0	0	0	0	1	10
1	1980-06-23	170	150	96	77	64	4012.94	1	3	14	14525.1	12117.5	1249.84	45.2334	1980-06-09	2763.09	1	0	0	0	0	0	0	0	1	10
1	1980-06-09	270	180	97	62	55	2763.09	0	1	0	9994.4	8345.53	0	0	1980-06-09	2763.09	0	0	0	0	0	0	0	0	0	10
1	1980-06-12	220	190	97	74	70	4185.52	3	2	3	15150.7	12638.4	1422.42	51.4793	1980-06-09	2763.09	3	0	0	0	0	0	0	0	3	10
1	1980-06-16	250	190	97	79	79	5038.93	5	2	7	18244.3	15214	2275.83	82.3654	1980-06-09	2763.09	5	0	0	0	0	0	0	0	5	10
1	1980-06-23	170	150	97	79	79	5038.93	5	3	14	18244.3	15214	2275.83	82.3654	1980-06-09	2763.09	5	0	0	0	0	0	0	0	5	10
1	1980-06-09	270	180	98	64	53	2763.09	2	1	0	9994.4	8345.53	0	0	1980-06-09	2763.09	0	0	2	0	0	0	0	0	2	10
1	1980-06-12	220	190	98	70	61	3463.91	5	2	3	12534.9	10460.6	700.816	25.3634	1980-06-09	2763.09	0	0	5	0	0	0	0	0	5	10
1	1980-06-16	250	190	98	70	61	3463.91	5	3	7	12534.9	10460.6	700.816	25.3634	1980-06-09	2763.09	0	0	5	0	0	0	0	0	5	10
1	1980-06-09	270	180	99	61	49	2442.36	2	1	0	8831.73	7377.54	0	0	1980-06-09	2442.36	1	0	1	0	0	0	0	0	2	10
1	1980-06-12	220	190	99	66	56	3004.3	20	2	3	10868.8	9073.49	561.944	23.0083	1980-06-09	2442.36	19	0	1	0	0	0	0	0	20	10
1	1980-06-16	250	190	99	66	56	3004.3	20	2	7	10868.8	9073.49	561.944	23.0083	1980-06-09	2442.36	19	0	1	0	0	0	0	0	20	10
1	1980-06-23	170	150	99	66	56	3004.3	20	3	14	10868.8	9073.49	561.944	23.0083	1980-06-09	2442.36	19	0	1	0	0	0	0	0	20	10
1	1980-06-09	270	180	100	70	59	3358.95	0	1	0	12154.4	10143.8	0	0	1980-06-09	3358.95	0	0	0	0	0	0	0	0	0	10
1	1980-06-12	220	190	100	82	73	4849.39	8	2	3	17557.2	14642	1490.44	44.3723	1980-06-09	3358.95	8	0	0	0	0	0	0	0	8	10
1	1980-06-16	250	190	100	91	80	5902.23	10	2	7	21373.8	17819.4	2543.28	75.7166	1980-06-09	3358.95	10	0	0	0	0	0	0	0	10	10
1	1980-06-23	170	150	100	94	80	6111.14	12	2	14	22131.1	18449.9	2752.19	81.9362	1980-06-09	3358.95	10	0	0	0	0	0	2	0	10	10
1	1980-06-26	170	150	100	95	82	6323.69	12	2	17	22901.6	19091.4	2964.74	88.2639	1980-06-09	3358.95	10	0	0	0	0	0	0	2	10	10
1	1980-06-30	180	150	100	95	84	6467.41	20	2	21	23422.5	19525.1	3108.46	92.5425	1980-06-09	3358.95	10	0	0	0	0	0	5	5	10	10
1	1980-07-03	180	150	100	95	84	6467.41	50	2	24	28671.3	19525.1	3108.46	92.5425	1980-06-09	3358.95	10	0	0	0	0	0	15	25	10	10
1	1980-07-07	200	160	100	95	84	6467.41	50	3	28	28671.3	19525.1	3108.46	92.5425	1980-06-09	3358.95	10	0	0	0	0	0	15	25	10	10
1	1980-06-09	270	180	101	44	32	1165.87	0	1	0	4204.47	3525.11	0	0	1980-06-09	1165.87	0	0	0	0	0	0	0	0	0	10
1	1980-06-12	220	190	101	46	40	1492.87	15	2	3	5389.83	4511.98	326.993	28.0471	1980-06-09	1165.87	15	0	0	0	0	0	0	0	15	10
1	1980-06-16	250	190	101	46	40	1492.87	15	3	7	5389.83	4511.98	326.993	28.0471	1980-06-09	1165.87	15	0	0	0	0	0	0	0	15	10
1	1980-06-12	220	190	102	40	39	1259.73	0	1	0	4544.71	3808.38	0	0	1980-06-12	1259.73	0	0	0	0	0	0	0	0	0	10
1	1980-06-16	250	190	102	40	39	1259.73	0	3	4	4544.71	3808.38	0	0	1980-06-12	1259.73	0	0	0	0	0	0	0	0	0	10
1	1980-06-12	220	190	103	57	52	2398.15	0	1	0	8671.49	7244.13	0	0	1980-06-12	2398.15	0	0	0	0	0	0	0	0	0	10
1	1980-06-16	250	190	103	77	71	4421.27	2	2	4	16005.3	13349.9	2023.12	84.3616	1980-06-12	2398.15	2	0	0	0	0	0	0	0	2	10
1	1980-06-23	170	150	103	77	71	4421.27	2	3	11	16005.3	13349.9	2023.12	84.3616	1980-06-12	2398.15	2	0	0	0	0	0	0	0	2	10
1	1980-06-12	220	190	104	52	42	1783.53	2	1	0	6443.47	5389.19	0	0	1980-06-12	1783.53	0	0	2	0	0	0	0	0	2	10
1	1980-06-16	250	190	104	75	69	4185.52	5	2	4	15150.7	12638.4	2401.99	134.676	1980-06-12	1783.53	5	0	0	0	0	0	0	0	5	10
1	1980-06-23	170	150	104	75	75	4541.58	5	2	11	16441.4	13713	2758.05	154.64	1980-06-12	1783.53	5	0	0	0	0	0	0	0	5	10
1	1980-06-26	170	150	104	81	75	4912.17	7	2	14	17784.8	14831.4	3128.64	175.419	1980-06-12	1783.53	7	0	0	0	0	0	0	0	7	10
1	1980-06-30	180	150	104	81	75	4912.17	7	3	18	17784.8	14831.4	3128.64	175.419	1980-06-12	1783.53	7	0	0	0	0	0	0	0	7	10
1	1980-06-12	220	190	105	58	54	2531.98	5	1	0	9156.61	7648.02	0	0	1980-06-12	2531.98	0	0	5	0	0	0	0	0	5	10
1	1980-06-16	250	190	105	75	71	4302.59	10	2	4	15575.1	12991.7	1770.61	69.9298	1980-06-12	2531.98	5	0	5	0	0	0	0	0	10	10
1	1980-06-23	170	150	105	75	71	4302.59	10	3	11	15575.1	12991.7	1770.61	69.9298	1980-06-12	2531.98	5	0	5	0	0	0	0	0	10	10
1	1980-06-12	220	190	106	54	48	2100.02	0	1	0	7590.77	6344.38	0	0	1980-06-12	2100.02	0	0	0	0	0	0	0	0	0	10
1	1980-06-16	250	190	106	56	53	2398.15	1	2	4	8671.49	7244.13	298.129	14.1965	1980-06-12	2100.02	1	0	0	0	0	0	0	0	1	10
1	1980-06-23	170	150	106	56	53	2398.15	1	3	11	8671.49	7244.13	298.129	14.1965	1980-06-12	2100.02	1	0	0	0	0	0	0	0	1	10
1	1980-06-12	220	190	107	52	55	2310.96	0	1	0	8355.4	6980.97	0	0	1980-06-12	2310.96	0	0	0	0	0	0	0	0	0	10
1	1980-06-16	250	190	107	65	67	3517	1	2	4	12727.3	10620.8	1206.04	52.188	1980-06-12	2310.96	1	0	0	0	0	0	0	0	1	10
1	1980-06-23	170	150	107	65	67	3517	1	3	11	12727.3	10620.8	1206.04	52.188	1980-06-12	2310.96	1	0	0	0	0	0	0	0	1	10
1	1980-06-12	220	190	108	57	51	2354.35	0	1	0	8512.71	7111.94	0	0	1980-06-12	2354.35	0	0	0	0	0	0	0	0	0	10
1	1980-06-16	250	190	108	66	58	3103.61	1	2	4	11228.8	9373.21	749.259	31.8244	1980-06-12	2354.35	1	0	0	0	0	0	0	0	1	10
1	1980-06-23	170	150	108	66	58	3103.61	1	3	11	11228.8	9373.21	749.259	31.8244	1980-06-12	2354.35	1	0	0	0	0	0	0	0	1	10
1	1980-06-12	220	190	109	61	57	2810.53	10	1	0	10166.4	8488.68	0	0	1980-06-12	2810.53	10	0	0	0	0	0	0	0	10	10
1	1980-06-16	250	190	109	70	67	3788.48	10	2	4	13711.4	11440.1	977.953	34.796	1980-06-12	2810.53	10	0	0	0	0	0	0	0	10	10
1	1980-06-23	170	150	109	70	68	3843.99	40	2	11	13912.6	11607.7	1033.46	36.771	1980-06-12	2810.53	20	0	0	0	0	0	20	0	20	10
1	1980-06-26	170	150	109	71	68	3899.9	100	2	14	14115.3	11776.4	1089.37	38.7604	1980-06-12	2810.53	30	0	0	0	0	0	60	10	30	10
1	1980-06-30	180	150	109	71	68	3899.9	100	3	18	14115.3	11776.4	1089.37	38.7604	1980-06-12	2810.53	30	0	0	0	0	0	60	10	30	10
1	1980-06-16	250	190	110	56	58	2623.21	2	1	0	9487.34	7923.37	0	0	1980-06-16	2623.21	2	0	0	0	0	0	0	0	2	10
1	1980-06-23	170	150	110	56	58	2623.21	2	3	7	9487.34	7923.37	0	0	1980-06-16	2623.21	2	0	0	0	0	0	0	0	2	10
1	1980-06-16	250	190	111	61	57	2810.53	2	1	0	10166.4	8488.68	0	0	1980-06-16	2810.53	2	0	0	0	0	0	0	0	2	10
1	1980-06-23	170	150	111	72	66	3843.99	8	2	7	13912.6	11607.7	1033.46	36.771	1980-06-16	2810.53	8	0	0	0	0	0	0	0	8	10
1	1980-06-26	170	150	111	72	66	3843.99	8	3	10	13912.6	11607.7	1033.46	36.771	1980-06-16	2810.53	8	0	0	0	0	0	0	0	8	10
1	1980-06-16	250	190	112	64	59	3053.76	2	1	0	11048	9222.74	0	0	1980-06-16	3053.76	2	0	0	0	0	0	0	0	2	10
1	1980-06-23	170	150	112	69	65	3624.38	5	2	7	13116.6	10944.9	570.624	18.686	1980-06-16	3053.76	5	0	0	0	0	0	0	0	5	10
1	1980-06-26	170	150	112	69	65	3624.38	10	2	10	13116.6	10944.9	570.624	18.686	1980-06-16	3053.76	10	0	0	0	0	0	0	0	10	10
1	1980-06-30	180	150	112	69	65	3624.38	10	3	14	13116.6	10944.9	570.624	18.686	1980-06-16	3053.76	10	0	0	0	0	0	0	0	10	10
1	1980-06-16	250	190	113	68	57	3153.87	5	1	0	11411	9524.89	0	0	1980-06-16	3153.87	0	0	5	0	0	0	0	0	5	11
1	1980-06-23	170	150	113	78	66	4185.52	5	2	7	15150.7	12638.4	1031.64	32.7104	1980-06-16	3153.87	0	0	5	0	0	0	0	0	5	11
1	1980-06-26	170	150	113	80	69	4481.22	7	2	10	16222.6	13530.8	1327.35	42.0864	1980-06-16	3153.87	2	0	5	0	0	0	0	0	7	11
1	1980-06-30	180	150	113	80	72	4663.49	9	2	14	16883.3	14080.9	1509.62	47.8656	1980-06-16	3153.87	4	0	5	0	0	0	0	0	9	11
1	1980-07-03	180	150	113	80	74	4787.02	28	2	17	21212.1	14453.7	1633.15	51.7824	1980-06-16	3153.87	5	0	5	0	0	0	15	3	10	11
1	1980-07-07	200	160	113	80	74	4787.02	90	2	21	21212.1	14453.7	1633.15	51.7824	1980-06-16	3153.87	5	0	5	0	0	0	55	25	10	11
1	1980-07-11	180	160	113	80	74	4787.02	90	3	25	21212.1	14453.7	1633.15	51.7824	1980-06-16	3153.87	5	0	5	0	0	0	55	25	10	11
1	1980-06-16	250	190	114	46	50	1860.23	2	1	0	6721.52	5620.68	0	0	1980-06-16	1860.23	0	0	2	0	0	0	0	0	2	11
1	1980-06-23	170	150	114	46	50	1860.23	2	3	7	6721.52	5620.68	0	0	1980-06-16	1860.23	0	0	2	0	0	0	0	0	2	11
1	1980-06-16	250	190	115	39	45	1424.24	5	1	0	5141.05	4304.86	0	0	1980-06-16	1424.24	0	0	5	0	0	0	0	0	5	11
1	1980-06-23	170	150	115	39	45	1424.24	5	3	7	5141.05	4304.86	0	0	1980-06-16	1424.24	0	0	5	0	0	0	0	0	5	11
1	1980-06-16	250	190	116	50	47	1899.19	2	1	0	6862.73	5738.25	0	0	1980-06-16	1899.19	0	0	2	0	0	0	0	0	2	11
1	1980-06-23	170	150	116	50	47	1899.19	2	3	7	6862.73	5738.25	0	0	1980-06-16	1899.19	0	0	2	0	0	0	0	0	2	11
1	1980-06-16	250	190	117	61	57	2810.53	3	1	0	10166.4	8488.68	0	0	1980-06-16	2810.53	3	0	0	0	0	0	0	0	3	11
1	1980-06-23	170	150	117	72	64	3733.38	5	2	7	13511.7	11273.8	922.848	32.8354	1980-06-16	2810.53	5	0	0	0	0	0	0	0	5	11
1	1980-06-26	170	150	117	72	70	4070.06	14	2	10	14732.1	12289.9	1259.53	44.8147	1980-06-16	2810.53	12	0	0	0	0	0	0	2	12	11
1	1980-06-30	180	150	117	72	70	4070.06	14	3	14	14732.1	12289.9	1259.53	44.8147	1980-06-16	2810.53	12	0	0	0	0	0	0	2	12	11
1	1980-06-16	250	190	118	63	61	3103.61	5	1	0	11228.8	9373.21	0	0	1980-06-16	3103.61	5	0	0	0	0	0	0	0	5	11
1	1980-06-23	170	150	118	63	61	3103.61	5	3	7	11228.8	9373.21	0	0	1980-06-16	3103.61	5	0	0	0	0	0	0	0	5	11
1	1980-06-16	250	190	119	74	67	4012.94	1	1	0	14525.1	12117.5	0	0	1980-06-16	4012.94	0	0	1	0	0	0	0	0	1	11
1	1980-06-23	170	150	119	74	67	4012.94	1	3	7	14525.1	12117.5	0	0	1980-06-16	4012.94	0	0	1	0	0	0	0	0	1	11
1	1980-06-16	250	190	120	72	65	3788.48	3	1	0	13711.4	11440.1	0	0	1980-06-16	3788.48	3	0	0	0	0	0	0	0	3	11
1	1980-06-23	170	150	120	76	69	4243.85	10	2	7	15362.1	12814.4	455.369	12.0198	1980-06-16	3788.48	10	0	0	0	0	0	0	0	10	11
1	1980-06-26	170	150	120	77	69	4302.59	10	2	10	15575.1	12991.7	514.106	13.5702	1980-06-16	3788.48	10	0	0	0	0	0	0	0	10	11
1	1980-06-30	180	150	120	77	70	4361.73	15	2	14	15789.5	13170.2	573.248	15.1313	1980-06-16	3788.48	10	0	0	0	0	0	0	5	10	11
1	1980-07-03	180	150	120	80	76	4912.17	15	2	17	21767.6	14831.4	1123.69	29.6606	1980-06-16	3788.48	10	0	0	0	0	0	0	5	10	11
1	1980-07-07	200	160	120	81	76	4975.35	45	2	21	22048	15022.1	1186.87	31.3283	1980-06-16	3788.48	10	0	0	0	0	0	10	25	10	11
1	1980-07-11	180	160	120	81	76	4975.35	45	3	25	22048	15022.1	1186.87	31.3283	1980-06-16	3788.48	10	0	0	0	0	0	10	25	10	11
1	1980-06-16	250	190	121	52	54	2267.96	2	1	0	8199.55	6851.21	0	0	1980-06-16	2267.96	2	0	0	0	0	0	0	0	2	11
1	1980-06-23	170	150	121	59	60	2858.37	5	2	7	10339.8	8633.06	590.405	26.0324	1980-06-16	2267.96	2	0	3	0	0	0	0	0	5	11
1	1980-06-26	170	150	121	59	60	2858.37	100	2	10	10339.8	8633.06	590.405	26.0324	1980-06-16	2267.96	7	0	3	0	0	0	90	0	10	11
1	1980-06-30	180	150	121	59	60	2858.37	100	3	14	10339.8	8633.06	590.405	26.0324	1980-06-16	2267.96	7	0	3	0	0	0	90	0	10	11
1	1980-06-16	250	190	122	69	59	3307.07	1	1	0	11966.3	9987.26	0	0	1980-06-16	3307.07	1	0	0	0	0	0	0	0	1	11
1	1980-06-23	170	150	122	69	59	3307.07	1	3	7	11966.3	9987.26	0	0	1980-06-16	3307.07	1	0	0	0	0	0	0	0	1	11
1	1980-06-16	250	190	123	71	66	3788.48	20	1	0	13711.4	11440.1	0	0	1980-06-16	3788.48	20	0	0	0	0	0	0	0	20	11
1	1980-06-23	170	150	123	72	70	4070.06	35	2	7	14732.1	12289.9	281.578	7.43247	1980-06-16	3788.48	35	0	0	0	0	0	0	0	35	11
1	1980-06-26	170	150	123	72	70	4070.06	43	2	10	14732.1	12289.9	281.578	7.43247	1980-06-16	3788.48	40	0	0	0	0	0	0	3	40	11
1	1980-06-30	180	150	123	72	70	4070.06	100	2	14	14732.1	12289.9	281.578	7.43247	1980-06-16	3788.48	90	0	0	0	0	0	5	5	90	11
1	1980-07-03	180	150	123	72	70	4070.06	100	3	17	18029.5	12289.9	281.578	7.43247	1980-06-16	3788.48	90	0	0	0	0	0	5	5	90	11
1	1980-06-16	250	190	124	55	55	2442.36	2	1	0	8831.73	7377.54	0	0	1980-06-16	2442.36	2	0	0	0	0	0	0	0	2	11
1	1980-06-23	170	150	124	55	55	2442.36	2	3	7	8831.73	7377.54	0	0	1980-06-16	2442.36	2	0	0	0	0	0	0	0	2	11
1	1980-06-16	250	190	125	50	49	1978.31	1	1	0	7149.56	5977.05	0	0	1980-06-16	1978.31	1	0	0	0	0	0	0	0	1	11
1	1980-06-23	170	150	125	62	58	2906.61	5	2	7	10514.6	8778.65	928.298	46.9238	1980-06-16	1978.31	3	0	2	0	0	0	0	0	5	11
1	1980-06-26	170	150	125	70	66	3733.38	6	2	10	13511.7	11273.8	1755.07	88.7154	1980-06-16	1978.31	4	0	2	0	0	0	0	0	6	11
1	1980-06-30	180	150	125	76	70	4302.59	7	2	14	15575.1	12991.7	2324.28	117.488	1980-06-16	1978.31	5	0	2	0	0	0	0	0	7	11
1	1980-07-03	180	150	125	78	72	4541.58	8	2	17	20122.5	13713	2563.27	129.568	1980-06-16	1978.31	6	0	2	0	0	0	0	0	8	11
1	1980-07-07	200	160	125	80	73	4725.06	12	2	21	20937	14266.7	2746.74	138.843	1980-06-16	1978.31	10	0	2	0	0	0	0	0	12	11
1	1980-07-11	180	160	125	80	73	4725.06	80	2	25	20937	14266.7	2746.74	138.843	1980-06-16	1978.31	10	0	2	0	0	0	20	48	12	11
1	1980-07-15	170	150	125	80	73	4725.06	80	3	29	20937	14266.7	2746.74	138.843	1980-06-16	1978.31	10	0	2	0	0	0	20	48	12	11
1	1980-06-16	250	190	126	53	57	2442.36	2	1	0	8831.73	7377.54	0	0	1980-06-16	2442.36	2	0	0	0	0	0	0	0	2	11
1	1980-06-23	170	150	126	61	63	3103.61	5	2	7	11228.8	9373.21	661.253	27.0744	1980-06-16	2442.36	5	0	0	0	0	0	0	0	5	11
1	1980-06-26	170	150	126	63	64	3255.6	7	2	10	11779.7	9831.92	813.245	33.2975	1980-06-16	2442.36	7	0	0	0	0	0	0	0	7	11
1	1980-06-30	180	150	126	64	65	3358.95	10	2	14	12154.4	10143.8	916.591	37.5289	1980-06-16	2442.36	10	0	0	0	0	0	0	0	10	11
1	1980-07-03	180	150	126	64	66	3411.23	17	2	17	15104.9	10301.6	968.869	39.6694	1980-06-16	2442.36	12	0	0	0	0	0	3	2	12	11
1	1980-07-07	200	160	126	64	66	3411.23	98	2	21	15104.9	10301.6	968.869	39.6694	1980-06-16	2442.36	28	0	0	0	0	0	0	70	28	11
1	1980-07-11	180	160	126	64	66	3411.23	98	3	25	15104.9	10301.6	968.869	39.6694	1980-06-16	2442.36	28	0	0	0	0	0	0	70	28	11
1	1980-06-16	250	190	127	43	40	1390.53	1	1	0	5018.85	4203.12	0	0	1980-06-16	1390.53	1	0	0	0	0	0	0	0	1	11
1	1980-06-23	170	150	127	43	40	1390.53	1	3	7	5018.85	4203.12	0	0	1980-06-16	1390.53	1	0	0	0	0	0	0	0	1	11
1	1980-06-16	250	190	128	40	41	1324.32	3	1	0	4778.86	4003.31	0	0	1980-06-16	1324.32	0	0	3	0	0	0	0	0	3	11
1	1980-06-23	170	150	128	63	61	3103.61	5	2	7	11228.8	9373.21	1779.29	134.355	1980-06-16	1324.32	0	0	5	0	0	0	0	0	5	11
1	1980-06-26	170	150	128	65	64	3358.95	5	2	10	12154.4	10143.8	2034.63	153.635	1980-06-16	1324.32	0	0	5	0	0	0	0	0	5	11
1	1980-06-30	180	150	128	65	65	3411.23	8	2	14	12343.9	10301.6	2086.9	157.583	1980-06-16	1324.32	8	0	0	0	0	0	0	0	8	12
1	1980-07-03	180	150	128	65	65	3411.23	8	3	17	15104.9	10301.6	2086.9	157.583	1980-06-16	1324.32	8	0	0	0	0	0	0	0	8	12
1	1980-06-23	170	150	129	53	49	2100.02	7	1	0	7590.77	6344.38	0	0	1980-06-23	2100.02	0	0	7	0	0	0	0	0	7	12
1	1980-06-26	170	150	129	60	59	2858.37	7	2	3	10339.8	8633.06	758.342	36.1111	1980-06-23	2100.02	0	0	7	0	0	0	0	0	7	12
1	1980-06-30	180	150	129	64	64	3307.07	7	2	7	11966.3	9987.26	1207.05	57.4779	1980-06-23	2100.02	0	0	7	0	0	0	0	0	7	12
1	1980-07-03	180	150	129	68	67	3678.68	7	2	10	16292.1	11108.8	1578.65	75.173	1980-06-23	2100.02	0	0	7	0	0	0	0	0	7	12
1	1980-07-07	200	160	129	68	67	3678.68	37	2	14	16292.1	11108.8	1578.65	75.173	1980-06-23	2100.02	0	0	15	0	0	0	20	2	15	12
1	1980-07-11	180	160	129	68	67	3678.68	37	3	18	16292.1	11108.8	1578.65	75.173	1980-06-23	2100.02	0	0	15	0	0	0	20	2	15	12
1	1980-06-23	170	150	130	63	56	2858.37	1	1	0	10339.8	8633.06	0	0	1980-06-23	2858.37	0	0	1	0	0	0	0	0	1	12
1	1980-06-26	170	150	130	83	73	4912.17	2	2	3	17784.8	14831.4	2053.8	71.8523	1980-06-23	2858.37	1	0	1	0	0	0	0	0	2	12
1	1980-06-30	180	150	130	93	82	6181.59	4	2	7	22386.4	18662.5	3323.22	116.263	1980-06-23	2858.37	2	0	2	0	0	0	0	0	4	12
1	1980-07-03	180	150	130	95	85	6539.87	6	2	10	28992.9	19743.8	3681.5	128.797	1980-06-23	2858.37	4	0	2	0	0	0	0	0	6	12
1	1980-07-07	200	160	130	97	86	6759.68	13	2	14	29968.7	20407.2	3901.31	136.488	1980-06-23	2858.37	10	0	3	0	0	0	0	0	13	12
1	1980-07-11	180	160	130	97	87	6833.76	18	2	18	30297.5	20630.8	3975.39	139.079	1980-06-23	2858.37	15	0	3	0	0	0	0	0	18	12
1	1980-07-15	170	150	130	97	87	6833.76	73	2	22	30297.5	20630.8	3975.39	139.079	1980-06-23	2858.37	20	0	3	0	0	0	20	30	23	12
1	1980-07-18	180	150	130	97	90	7058.42	93	2	25	31294.8	21308.8	4200.05	146.939	1980-06-23	2858.37	20	0	3	0	0	0	15	55	23	12
1	1980-07-21	160	150	130	97	90	7058.42	93	3	28	31294.8	21308.8	4200.05	146.939	1980-06-23	2858.37	20	0	3	0	0	0	15	55	23	12
1	1980-06-23	170	150	131	69	65	3624.38	2	1	0	13116.6	10944.9	0	0	1980-06-23	3624.38	2	0	0	0	0	0	0	0	2	12
1	1980-06-26	170	150	131	72	68	3956.22	2	2	3	14319.5	11946.4	331.838	9.15571	1980-06-23	3624.38	2	0	0	0	0	0	0	0	2	12
1	1980-06-30	180	150	131	75	72	4361.73	3	2	7	15789.5	13170.2	737.35	20.3442	1980-06-23	3624.38	3	0	0	0	0	0	0	0	3	12
1	1980-07-03	180	150	131	75	74	4481.22	8	2	10	19854.6	13530.8	856.844	23.6411	1980-06-23	3624.38	3	5	0	0	0	0	0	0	8	12
1	1980-07-07	200	160	131	75	74	4481.22	13	2	14	19854.6	13530.8	856.844	23.6411	1980-06-23	3624.38	3	0	10	0	0	0	0	0	13	12
1	1980-07-11	180	160	131	77	74	4602.33	21	2	18	20392.2	13896.3	977.953	26.9826	1980-06-23	3624.38	3	0	10	0	0	0	0	8	13	12
1	1980-07-15	170	150	131	77	74	4602.33	100	2	22	20392.2	13896.3	977.953	26.9826	1980-06-23	3624.38	3	0	10	0	0	0	5	82	13	12
1	1980-07-18	180	150	131	77	74	4602.33	100	3	25	20392.2	13896.3	977.953	26.9826	1980-06-23	3624.38	3	0	10	0	0	0	5	82	13	12
1	1980-06-23	170	150	132	64	56	2906.61	1	1	0	10514.6	8778.65	0	0	1980-06-23	2906.61	1	0	0	0	0	0	0	0	1	12
1	1980-06-26	170	150	132	76	68	4185.52	4	2	3	15150.7	12638.4	1278.91	44	1980-06-23	2906.61	1	0	3	0	0	0	0	0	4	12
1	1980-06-30	180	150	132	82	74	4912.17	4	2	7	17784.8	14831.4	2005.56	69	1980-06-23	2906.61	1	0	3	0	0	0	0	0	4	12
1	1980-07-03	180	150	132	84	75	5102.91	8	2	10	22614.3	15407.1	2196.31	75.5625	1980-06-23	2906.61	5	0	3	0	0	0	0	0	8	12
1	1980-07-07	200	160	132	86	77	5362.89	10	2	14	23768.4	16191.7	2456.29	84.5069	1980-06-23	2906.61	7	0	3	0	0	0	0	0	10	12
1	1980-07-11	180	160	132	88	77	5495.31	18	2	18	24356.1	16591.3	2588.7	89.0625	1980-06-23	2906.61	7	0	3	0	0	0	3	5	10	12
1	1980-07-15	170	150	132	88	77	5495.31	18	3	22	24356.1	16591.3	2588.7	89.0625	1980-06-23	2906.61	7	0	3	0	0	0	3	5	10	12
1	1980-06-23	170	150	133	65	71	3733.38	3	1	0	13511.7	11273.8	0	0	1980-06-23	3733.38	3	0	0	0	0	0	0	0	3	12
1	1980-06-26	170	150	133	65	71	3733.38	3	3	3	13511.7	11273.8	0	0	1980-06-23	3733.38	3	0	0	0	0	0	0	0	3	12
1	1980-06-23	170	150	134	55	57	2531.98	2	1	0	9156.61	7648.02	0	0	1980-06-23	2531.98	0	0	2	0	0	0	0	0	2	12
1	1980-06-26	170	150	134	62	63	3153.87	3	2	3	11411	9524.89	621.893	24.5615	1980-06-23	2531.98	1	0	2	0	0	0	0	0	3	12
1	1980-06-30	180	150	134	63	66	3358.95	3	2	7	12154.4	10143.8	826.97	32.661	1980-06-23	2531.98	1	0	2	0	0	0	0	0	3	12
1	1980-07-03	180	150	134	63	66	3358.95	3	3	10	14872.8	10143.8	826.97	32.661	1980-06-23	2531.98	1	0	2	0	0	0	0	0	3	12
1	1980-06-23	170	150	135	85	71	4912.17	2	1	0	17784.8	14831.4	0	0	1980-06-23	4912.17	0	0	2	0	0	0	0	0	2	12
1	1980-06-26	170	150	135	90	77	5629.33	2	2	3	20384.5	16995.8	717.165	14.5998	1980-06-23	4912.17	0	0	2	0	0	0	0	0	2	12
1	1980-06-30	180	150	135	90	77	5629.33	2	3	7	20384.5	16995.8	717.165	14.5998	1980-06-23	4912.17	0	0	2	0	0	0	0	0	2	12
1	1980-06-23	170	150	136	58	50	2354.35	2	1	0	8512.71	7111.94	0	0	1980-06-23	2354.35	0	0	2	0	0	0	0	0	2	12
1	1980-06-26	170	150	136	62	63	3153.87	2	2	3	11411	9524.89	799.519	33.9592	1980-06-23	2354.35	0	0	2	0	0	0	0	0	2	12
1	1980-06-30	180	150	136	67	71	3843.99	2	2	7	13912.6	11607.7	1489.64	63.2716	1980-06-23	2354.35	0	0	2	0	0	0	0	0	2	12
1	1980-07-03	180	150	136	70	72	4070.06	2	2	10	18029.5	12289.9	1715.71	72.8738	1980-06-23	2354.35	0	0	2	0	0	0	0	0	2	12
1	1980-07-07	200	160	136	72	73	4243.85	28	2	14	18800.9	12814.4	1889.5	80.2555	1980-06-23	2354.35	0	0	3	0	0	0	25	0	3	12
1	1980-07-11	180	160	136	72	73	4243.85	28	3	18	18800.9	12814.4	1889.5	80.2555	1980-06-23	2354.35	0	0	3	0	0	0	25	0	3	12
1	1980-06-23	170	150	137	60	60	2906.61	3	1	0	10514.6	8778.65	0	0	1980-06-23	2906.61	0	0	3	0	0	0	0	0	3	12
1	1980-06-26	170	150	137	67	64	3463.91	10	2	3	12534.9	10460.6	557.302	19.1736	1980-06-23	2906.61	7	0	3	0	0	0	0	0	10	12
1	1980-06-30	180	150	137	69	66	3678.68	10	2	7	13313.4	11108.8	772.068	26.5625	1980-06-23	2906.61	7	0	3	0	0	0	0	0	10	12
1	1980-07-03	180	150	137	69	66	3678.68	10	2	10	16292.1	11108.8	772.068	26.5625	1980-06-23	2906.61	7	0	3	0	0	0	0	0	10	12
1	1980-07-07	200	160	137	69	66	3678.68	48	2	14	16292.1	11108.8	772.068	26.5625	1980-06-23	2906.61	10	0	5	0	0	0	3	30	15	12
1	1980-07-11	180	160	137	69	66	3678.68	48	3	18	16292.1	11108.8	772.068	26.5625	1980-06-23	2906.61	10	0	5	0	0	0	3	30	15	12
1	1980-06-23	170	150	138	70	58	3307.07	5	1	0	11966.3	9987.26	0	0	1980-06-23	3307.07	0	0	5	0	0	0	0	0	5	12
1	1980-06-26	170	150	138	75	64	3899.9	15	2	3	14115.3	11776.4	592.827	17.926	1980-06-23	3307.07	10	0	5	0	0	0	0	0	15	12
1	1980-06-30	180	150	138	81	71	4663.49	30	2	7	16883.3	14080.9	1356.42	41.0156	1980-06-23	3307.07	25	0	5	0	0	0	0	0	30	12
1	1980-07-03	180	150	138	81	71	4663.49	30	3	10	20663.7	14080.9	1356.42	41.0156	1980-06-23	3307.07	25	0	5	0	0	0	0	0	30	12
1	1980-06-23	170	150	139	55	57	2531.98	1	1	0	9156.61	7648.02	0	0	1980-06-23	2531.98	0	0	1	0	0	0	0	0	1	12
1	1980-06-26	170	150	139	56	59	2669.44	1	2	3	9654.89	8062.87	137.458	5.42889	1980-06-23	2531.98	0	0	1	0	0	0	0	0	1	12
1	1980-06-30	180	150	139	60	62	3004.3	1	2	7	10868.8	9073.49	472.324	18.6543	1980-06-23	2531.98	0	0	1	0	0	0	0	0	1	12
1	1980-07-03	180	150	139	60	63	3053.76	18	2	10	13518.1	9222.74	521.777	20.6075	1980-06-23	2531.98	0	0	3	0	0	0	10	5	3	12
1	1980-07-07	200	160	139	60	63	3053.76	18	3	14	13518.1	9222.74	521.777	20.6075	1980-06-23	2531.98	0	0	3	0	0	0	10	5	3	13
1	1980-06-23	170	150	140	67	67	3624.38	3	1	0	13116.6	10944.9	0	0	1980-06-23	3624.38	0	0	3	0	0	0	0	0	3	13
1	1980-06-26	170	150	140	72	72	4185.52	4	2	3	15150.7	12638.4	561.137	15.4823	1980-06-23	3624.38	1	0	3	0	0	0	0	0	4	13
1	1980-06-30	180	150	140	72	76	4421.27	4	2	7	16005.3	13349.9	796.895	21.9871	1980-06-23	3624.38	1	0	3	0	0	0	0	0	4	13
1	1980-07-03	180	150	140	75	76	4602.33	6	2	10	20392.2	13896.3	977.953	26.9826	1980-06-23	3624.38	1	0	3	0	0	0	2	0	4	13
1	1980-07-07	200	160	140	73	72	4243.85	8	2	14	18800.9	12814.4	619.471	17.0918	1980-06-23	3624.38	2	0	3	0	0	0	0	3	5	13
1	1980-07-11	180	160	140	73	72	4243.85	80	2	18	18800.9	12814.4	619.471	17.0918	1980-06-23	3624.38	2	0	3	0	0	0	5	70	5	13
1	1980-07-15	170	150	140	73	72	4243.85	80	3	22	18800.9	12814.4	619.471	17.0918	1980-06-23	3624.38	2	0	3	0	0	0	5	70	5	13
1	1980-06-23	170	150	141	66	59	3153.87	1	1	0	11411	9524.89	0	0	1980-06-23	3153.87	1	0	0	0	0	0	0	0	1	13
1	1980-06-26	170	150	141	79	71	4541.58	1	2	3	16441.4	13713	1387.7	44	1980-06-23	3153.87	1	0	0	0	0	0	0	0	1	13
1	1980-06-30	180	150	141	87	82	5764.98	2	2	7	20876.2	17405.2	2611.1	82.7904	1980-06-23	3153.87	1	0	1	0	0	0	0	0	2	13
1	1980-07-03	180	150	141	89	84	6041.1	2	2	10	26778.9	18238.6	2887.23	91.5456	1980-06-23	3153.87	1	0	1	0	0	0	0	0	2	13
1	1980-07-07	200	160	141	91	85	6252.44	6	2	14	27717	18876.4	3098.57	98.2464	1980-06-23	3153.87	5	0	1	0	0	0	0	0	6	13
1	1980-07-11	180	160	141	92	85	6323.69	11	2	18	28033.3	19091.4	3169.82	100.506	1980-06-23	3153.87	5	0	1	0	0	0	5	0	6	13
1	1980-07-15	170	150	141	92	86	6395.35	13	2	22	28351.4	19307.7	3241.47	102.778	1980-06-23	3153.87	5	0	1	0	0	0	3	4	6	13
1	1980-07-18	180	150	141	92	86	6395.35	16	2	25	28351.4	19307.7	3241.47	102.778	1980-06-23	3153.87	5	0	1	0	0	0	3	7	6	13
1	1980-07-21	160	150	141	92	88	6539.87	51	2	28	28992.9	19743.8	3386	107.36	1980-06-23	3153.87	5	0	1	0	0	0	20	25	6	13
1	1980-07-25	180	150	141	92	88	6539.87	86	2	32	28992.9	19743.8	3386	107.36	1980-06-23	3153.87	5	0	1	0	0	0	0	80	6	13
1	1980-07-29	250	150	141	92	88	6539.87	86	3	36	28992.9	19743.8	3386	107.36	1980-06-23	3153.87	5	0	1	0	0	0	0	80	6	13
1	1980-06-23	170	150	142	68	65	3570.49	0	1	0	12921.2	10782.2	0	0	1980-06-23	3570.49	0	0	0	0	0	0	0	0	0	13
1	1980-06-26	170	150	142	76	71	4361.73	1	2	3	15789.5	13170.2	791.243	22.1607	1980-06-23	3570.49	0	0	1	0	0	0	0	0	1	13
1	1980-06-30	180	150	142	84	73	4975.35	1	2	7	18013.8	15022.1	1404.86	39.3465	1980-06-23	3570.49	0	0	1	0	0	0	0	0	1	13
1	1980-07-03	180	150	142	84	78	5297.29	1	2	10	23477.2	15993.7	1726.81	48.3634	1980-06-23	3570.49	0	0	1	0	0	0	0	0	1	13
1	1980-07-07	200	160	142	84	79	5362.89	2	2	14	23768.4	16191.7	1792.41	50.2007	1980-06-23	3570.49	1	0	1	0	0	0	0	0	2	13
1	1980-07-11	180	160	142	84	79	5362.89	2	3	18	23768.4	16191.7	1792.41	50.2007	1980-06-23	3570.49	1	0	1	0	0	0	0	0	2	13
1	1980-06-23	170	150	143	45	45	1634.97	0	1	0	5904.94	4940.84	0	0	1980-06-23	1634.97	0	0	0	0	0	0	0	0	0	13
1	1980-06-26	170	150	143	51	51	2100.02	1	2	3	7590.77	6344.38	465.057	28.4444	1980-06-23	1634.97	1	0	0	0	0	0	0	0	1	13
1	1980-06-30	180	150	143	55	58	2577.39	10	2	7	9321.24	7785.08	942.427	57.642	1980-06-23	1634.97	10	0	0	0	0	0	0	0	10	13
1	1980-07-03	180	150	143	58	58	2716.06	10	2	10	12019.1	8203.59	1081.1	66.1235	1980-06-23	1634.97	10	0	0	0	0	0	0	0	10	13
1	1980-07-07	200	160	143	58	58	2716.06	10	3	14	12019.1	8203.59	1081.1	66.1235	1980-06-23	1634.97	10	0	0	0	0	0	0	0	10	13
1	1980-06-23	170	150	144	58	57	2669.44	3	1	0	9654.89	8062.87	0	0	1980-06-23	2669.44	0	0	3	0	0	0	0	0	3	13
1	1980-06-26	170	150	144	63	62	3153.87	3	2	3	11411	9524.89	484.435	18.1474	1980-06-23	2669.44	0	0	3	0	0	0	0	0	3	13
1	1980-06-30	180	150	144	64	65	3358.95	4	2	7	12154.4	10143.8	689.512	25.8299	1980-06-23	2669.44	1	0	3	0	0	0	0	0	4	13
1	1980-07-03	180	150	144	64	66	3411.23	4	2	10	15104.9	10301.6	741.791	27.7883	1980-06-23	2669.44	1	0	3	0	0	0	0	0	4	13
1	1980-07-07	200	160	144	64	66	3411.23	4	3	14	15104.9	10301.6	741.791	27.7883	1980-06-23	2669.44	1	0	3	0	0	0	0	0	4	13
1	1980-06-23	170	150	145	46	45	1671.5	0	1	0	6037.38	5051.1	0	0	1980-06-23	1671.5	0	0	0	0	0	0	0	0	0	13
1	1980-06-26	170	150	145	52	52	2183.19	0	2	3	7892.23	6595.36	511.684	30.6122	1980-06-23	1671.5	0	0	0	0	0	0	0	0	0	13
1	1980-06-30	180	150	145	57	58	2669.44	1	2	7	9654.89	8062.87	997.936	59.7029	1980-06-23	1671.5	1	0	0	0	0	0	0	0	1	13
1	1980-07-03	180	150	145	58	59	2763.09	1	2	10	12227.8	8345.53	1091.59	65.3061	1980-06-23	1671.5	1	0	0	0	0	0	0	0	1	13
1	1980-07-07	200	160	145	58	59	2763.09	16	2	14	12227.8	8345.53	1091.59	65.3061	1980-06-23	1671.5	1	0	0	0	0	0	5	10	1	13
1	1980-07-11	180	160	145	58	59	2763.09	31	2	18	12227.8	8345.53	1091.59	65.3061	1980-06-23	1671.5	1	0	0	0	0	0	10	20	1	13
1	1980-07-15	170	150	145	58	59	2763.09	31	3	22	12227.8	8345.53	1091.59	65.3061	1980-06-23	1671.5	1	0	0	0	0	0	10	20	1	13
1	1980-06-23	170	150	146	54	50	2183.19	50	1	0	7892.23	6595.36	0	0	1980-06-23	2183.19	0	0	50	0	0	0	0	0	50	13
1	1980-06-26	170	150	146	58	57	2669.44	50	2	3	9654.89	8062.87	486.251	22.2726	1980-06-23	2183.19	0	0	50	0	0	0	0	0	50	13
1	1980-06-30	180	150	146	58	57	2669.44	100	2	7	9654.89	8062.87	486.251	22.2726	1980-06-23	2183.19	0	0	55	0	0	0	35	10	55	13
1	1980-07-03	180	150	146	58	57	2669.44	100	3	10	11812.1	8062.87	486.251	22.2726	1980-06-23	2183.19	0	0	55	0	0	0	35	10	55	13
1	1980-06-23	170	150	147	69	59	3307.07	2	1	0	11966.3	9987.26	0	0	1980-06-23	3307.07	0	0	2	0	0	0	0	0	2	13
1	1980-06-26	170	150	147	77	66	4127.59	2	2	3	14940.7	12463.6	820.511	24.8108	1980-06-23	3307.07	0	0	2	0	0	0	0	0	2	13
1	1980-06-30	180	150	147	80	70	4541.58	7	2	7	16441.4	13713	1234.5	37.3291	1980-06-23	3307.07	5	0	2	0	0	0	0	0	7	13
1	1980-07-03	180	150	147	84	72	4912.17	14	2	10	21767.6	14831.4	1605.09	48.5352	1980-06-23	3307.07	12	0	2	0	0	0	0	0	14	13
1	1980-07-07	200	160	147	84	74	5038.93	20	2	14	22330.3	15214	1731.85	52.3682	1980-06-23	3307.07	18	0	2	0	0	0	0	0	20	13
1	1980-07-11	180	160	147	87	76	5362.89	27	2	18	23768.4	16191.7	2055.82	62.1643	1980-06-23	3307.07	23	0	2	0	0	0	0	2	25	13
1	1980-07-15	170	150	147	87	76	5362.89	100	2	22	23768.4	16191.7	2055.82	62.1643	1980-06-23	3307.07	23	0	2	0	0	0	70	5	25	13
1	1980-07-18	180	150	147	49	76	3153.87	100	3	25	13962.5	9524.89	-153.202	-4.63257	1980-06-23	3307.07	23	0	2	0	0	0	70	5	25	13
1	1980-06-26	170	150	148	49	47	1860.23	1	1	0	6721.52	5620.68	0	0	1980-06-26	1860.23	0	0	1	0	0	0	0	0	1	13
1	1980-06-30	180	150	148	69	69	3843.99	1	2	4	13912.6	11607.7	1983.76	106.641	1980-06-26	1860.23	0	0	1	0	0	0	0	0	1	13
1	1980-07-03	180	150	148	75	76	4602.33	1	2	7	20392.2	13896.3	2742.1	147.407	1980-06-26	1860.23	0	0	1	0	0	0	0	0	1	13
1	1980-07-07	200	160	148	80	78	5038.93	2	2	11	22330.3	15214	3178.7	170.877	1980-06-26	1860.23	1	0	1	0	0	0	0	0	2	13
1	1980-07-11	180	160	148	80	78	5038.93	2	2	15	22330.3	15214	3178.7	170.877	1980-06-26	1860.23	1	0	1	0	0	0	0	0	2	13
1	1980-07-15	170	150	148	80	79	5102.91	12	2	19	22614.3	15407.1	3242.68	174.316	1980-06-26	1860.23	2	0	1	0	0	0	5	4	3	13
1	1980-07-18	180	150	148	80	79	5102.91	12	3	22	22614.3	15407.1	3242.68	174.316	1980-06-26	1860.23	2	0	1	0	0	0	5	4	3	13
1	1980-06-26	170	150	149	65	58	3053.76	1	1	0	11048	9222.74	0	0	1980-06-26	3053.76	0	0	1	0	0	0	0	0	1	14
1	1980-06-30	180	150	149	79	72	4602.33	1	2	4	16661.6	13896.3	1548.58	50.7106	1980-06-26	3053.76	0	0	1	0	0	0	0	0	1	14
1	1980-07-03	180	150	149	85	77	5297.29	1	2	7	23477.2	15993.7	2243.54	73.4682	1980-06-26	3053.76	0	0	1	0	0	0	0	0	1	14
1	1980-07-07	200	160	149	88	78	5562.12	1	2	11	24652.7	16793	2508.36	82.1403	1980-06-26	3053.76	0	0	1	0	0	0	0	0	1	14
1	1980-07-11	180	160	149	88	79	5629.33	4	2	15	24951.1	16995.8	2575.58	84.3413	1980-06-26	3053.76	3	0	1	0	0	0	0	0	4	14
1	1980-07-15	170	150	149	88	79	5629.33	4	3	19	24951.1	16995.8	2575.58	84.3413	1980-06-26	3053.76	3	0	1	0	0	0	0	0	4	14
1	1980-06-26	170	150	150	55	57	2531.98	2	1	0	9156.61	7648.02	0	0	1980-06-26	2531.98	0	0	2	0	0	0	0	0	2	14
1	1980-06-30	180	150	150	63	64	3255.6	3	2	4	11779.7	9831.92	723.624	28.5794	1980-06-26	2531.98	0	0	3	0	0	0	0	0	3	14
1	1980-07-03	180	150	150	65	66	3463.91	4	2	7	15338.8	10460.6	931.931	36.8064	1980-06-26	2531.98	1	0	3	0	0	0	0	0	4	14
1	1980-07-07	200	160	150	68	67	3678.68	4	2	11	16292.1	11108.8	1146.7	45.2886	1980-06-26	2531.98	1	0	3	0	0	0	0	0	4	14
1	1980-07-11	180	160	150	68	68	3733.38	15	2	15	16534.9	11273.8	1201.4	47.449	1980-06-26	2531.98	2	0	3	0	0	0	0	10	5	14
1	1980-07-15	170	150	150	68	68	3733.38	80	2	19	16534.9	11273.8	1201.4	47.449	1980-06-26	2531.98	2	0	3	0	0	0	0	75	5	14
1	1980-07-18	180	150	150	68	68	3733.38	80	3	22	16534.9	11273.8	1201.4	47.449	1980-06-26	2531.98	2	0	3	0	0	0	0	75	5	14
1	1980-06-26	170	150	151	60	55	2669.44	0	1	0	9654.89	8062.87	0	0	1980-06-26	2669.44	0	0	0	0	0	0	0	0	0	14
1	1980-06-30	180	150	151	82	74	4912.17	1	2	4	17784.8	14831.4	2242.73	84.0151	1980-06-26	2669.44	1	0	0	0	0	0	0	0	1	14
1	1980-07-03	180	150	151	87	80	5629.33	2	2	7	24951.1	16995.8	2959.9	110.881	1980-06-26	2669.44	1	0	1	0	0	0	0	0	2	14
1	1980-07-07	200	160	151	90	81	5902.23	3	2	11	26162.5	17819.4	3232.79	121.104	1980-06-26	2669.44	1	0	1	0	0	0	1	0	2	14
1	1980-07-11	180	160	151	90	82	5971.47	7	2	15	26469.8	18028.4	3302.03	123.698	1980-06-26	2669.44	2	0	1	0	0	0	1	3	3	14
1	1980-07-15	170	150	151	91	84	6181.59	5	2	19	27402.5	18662.5	3512.15	131.569	1980-06-26	2669.44	2	0	1	0	0	0	0	2	3	14
1	1980-07-18	180	150	151	91	85	6252.44	13	2	22	27717	18876.4	3583	134.223	1980-06-26	2669.44	2	0	1	0	0	0	7	3	3	14
1	1980-07-21	160	150	151	91	85	6252.44	33	2	25	27717	18876.4	3583	134.223	1980-06-26	2669.44	2	0	1	0	0	0	10	20	3	14
1	1980-07-25	180	150	151	91	85	6252.44	53	2	29	27717	18876.4	3583	134.223	1980-06-26	2669.44	2	0	1	0	0	0	20	30	3	14
1	1980-07-29	250	150	151	91	85	6252.44	53	3	33	27717	18876.4	3583	134.223	1980-06-26	2669.44	2	0	1	0	0	0	20	30	3	14
1	1980-06-26	170	150	152	57	54	2486.97	0	1	0	8993.44	7512.17	0	0	1980-06-26	2486.97	0	0	0	0	0	0	0	0	0	14
1	1980-06-30	180	150	152	74	68	4070.06	0	2	4	14732.1	12289.9	1583.09	63.6555	1980-06-26	2486.97	0	0	0	0	0	0	0	0	0	14
1	1980-07-03	180	150	152	76	73	4481.22	0	2	7	19854.6	13530.8	1994.26	80.1883	1980-06-26	2486.97	0	0	0	0	0	0	0	0	0	14
1	1980-07-07	200	160	152	78	74	4663.49	0	2	11	20663.7	14080.9	2176.52	87.5172	1980-06-26	2486.97	0	0	0	0	0	0	0	0	0	14
1	1980-07-11	180	160	152	79	74	4725.06	15	2	15	20937	14266.7	2238.09	89.9927	1980-06-26	2486.97	0	0	0	0	0	0	10	5	0	14
1	1980-07-15	170	150	152	79	74	4725.06	100	2	19	20937	14266.7	2238.09	89.9927	1980-06-26	2486.97	0	0	0	0	0	0	10	90	0	14
1	1980-07-18	180	150	152	79	74	4725.06	100	3	22	20937	14266.7	2238.09	89.9927	1980-06-26	2486.97	0	0	0	0	0	0	10	90	0	14
1	1980-06-26	170	150	153	65	58	3053.76	1	1	0	11048	9222.74	0	0	1980-06-26	3053.76	0	0	1	0	0	0	0	0	1	14
1	1980-06-30	180	150	153	84	75	5102.91	1	2	4	18476.2	15407.1	2049.16	67.1029	1980-06-26	3053.76	0	0	1	0	0	0	0	0	1	14
1	1980-07-03	180	150	153	90	81	5902.23	2	2	7	26162.5	17819.4	2848.48	93.2778	1980-06-26	3053.76	1	0	1	0	0	0	0	0	2	14
1	1980-07-07	200	160	153	93	83	6252.44	5	2	11	27717	18876.4	3198.68	104.746	1980-06-26	3053.76	4	0	1	0	0	0	0	0	5	14
1	1980-07-11	180	160	153	90	85	6181.59	6	2	15	27402.5	18662.5	3127.83	102.426	1980-06-26	3053.76	5	0	1	0	0	0	0	0	6	14
1	1980-07-15	170	150	153	96	85	6612.74	64	2	19	29316.4	19963.7	3558.98	116.544	1980-06-26	3053.76	8	0	1	0	0	0	50	5	9	14
1	1980-07-18	180	150	153	96	85	6612.74	100	2	22	29316.4	19963.7	3558.98	116.544	1980-06-26	3053.76	8	0	1	0	0	0	3	88	9	14
1	1980-07-21	160	150	153	96	85	6612.74	100	3	25	29316.4	19963.7	3558.98	116.544	1980-06-26	3053.76	8	0	1	0	0	0	3	88	9	14
1	1980-06-26	170	150	154	55	58	2577.39	30	1	0	9321.24	7785.08	0	0	1980-06-26	2577.39	0	0	30	0	0	0	0	0	30	14
1	1980-06-30	180	150	154	60	66	3204.54	30	2	4	11594.6	9677.79	627.141	24.3324	1980-06-26	2577.39	0	0	30	0	0	0	0	0	30	14
1	1980-07-03	180	150	154	67	69	3733.38	30	2	7	16534.9	11273.8	1155.98	44.8508	1980-06-26	2577.39	0	0	30	0	0	0	0	0	30	14
1	1980-07-07	200	160	154	67	69	3733.38	39	2	11	16534.9	11273.8	1155.98	44.8508	1980-06-26	2577.39	5	0	30	0	0	0	1	3	35	14
1	1980-07-11	180	160	154	67	69	3733.38	72	2	15	16534.9	11273.8	1155.98	44.8508	1980-06-26	2577.39	5	0	30	0	0	0	12	25	35	14
1	1980-07-15	170	150	154	67	69	3733.38	72	3	19	16534.9	11273.8	1155.98	44.8508	1980-06-26	2577.39	5	0	30	0	0	0	12	25	35	14
1	1980-06-26	170	150	155	44	42	1492.87	2	1	0	5389.83	4511.98	0	0	1980-06-26	1492.87	0	0	2	0	0	0	0	0	2	14
1	1980-06-30	180	150	155	56	55	2486.97	2	2	4	8993.44	7512.17	994.1	66.59	1980-06-26	1492.87	0	0	2	0	0	0	0	0	2	14
1	1980-07-03	180	150	155	62	57	2858.37	5	2	7	12650.8	8633.06	1365.5	91.4684	1980-06-26	1492.87	3	0	2	0	0	0	0	0	5	14
1	1980-07-07	200	160	155	63	59	3004.3	6	2	11	13298.6	9073.49	1511.44	101.244	1980-06-26	1492.87	4	0	2	0	0	0	0	0	6	14
1	1980-07-11	180	160	155	63	59	3004.3	6	3	15	13298.6	9073.49	1511.44	101.244	1980-06-26	1492.87	4	0	2	0	0	0	0	0	6	14
1	1980-06-26	170	150	156	75	71	4302.59	1	1	0	15575.1	12991.7	0	0	1980-06-26	4302.59	0	0	1	0	0	0	0	0	1	14
1	1980-06-30	180	150	156	81	76	4975.35	2	2	4	18013.8	15022.1	672.759	15.6361	1980-06-26	4302.59	1	0	1	0	0	0	0	0	2	14
1	1980-07-03	180	150	156	85	80	5495.31	2	2	7	24356.1	16591.3	1192.72	27.721	1980-06-26	4302.59	1	0	1	0	0	0	0	0	2	14
1	1980-07-07	200	160	156	87	81	5696.95	2	2	11	25251.2	17199.9	1394.36	32.4076	1980-06-26	4302.59	1	0	1	0	0	0	0	0	2	14
1	1980-07-11	180	160	156	87	82	5764.98	17	2	15	25553.2	17405.2	1462.39	33.9886	1980-06-26	4302.59	3	0	1	0	0	0	3	10	4	14
1	1980-07-15	170	150	156	87	82	5764.98	90	2	19	25553.2	17405.2	1462.39	33.9886	1980-06-26	4302.59	3	0	1	0	0	0	0	86	4	14
1	1980-07-18	180	150	156	87	82	5764.98	90	3	22	25553.2	17405.2	1462.39	33.9886	1980-06-26	4302.59	3	0	1	0	0	0	0	86	4	14
1	1980-06-30	180	150	157	68	69	3788.48	1	1	0	13711.4	11440.1	0	0	1980-06-30	3788.48	1	0	0	0	0	0	0	0	1	14
1	1980-07-03	180	150	157	70	74	4185.52	1	2	3	18542	12638.4	397.035	10.48	1980-06-30	3788.48	1	0	0	0	0	0	0	0	1	14
1	1980-07-07	200	160	157	73	75	4421.27	1	2	7	19588.5	13349.9	632.793	16.7031	1980-06-30	3788.48	1	0	0	0	0	0	0	0	1	14
1	1980-07-11	180	160	157	75	75	4541.58	1	2	11	20122.5	13713	753.094	19.8785	1980-06-30	3788.48	1	0	0	0	0	0	0	0	1	14
1	1980-07-15	170	150	157	75	77	4663.49	27	2	15	20663.7	14080.9	875.01	23.0966	1980-06-30	3788.48	2	0	0	0	0	0	20	5	2	14
1	1980-07-18	180	150	157	75	77	4663.49	27	3	18	20663.7	14080.9	875.01	23.0966	1980-06-30	3788.48	2	0	0	0	0	0	20	5	2	15
1	1980-06-30	180	150	158	59	51	2442.36	0	1	0	8831.73	7377.54	0	0	1980-06-30	2442.36	0	0	0	0	0	0	0	0	0	15
1	1980-07-03	180	150	158	60	53	2577.39	0	2	3	11403.5	7785.08	135.036	5.52893	1980-06-30	2442.36	0	0	0	0	0	0	0	0	0	15
1	1980-07-07	200	160	158	64	55	2858.37	2	2	7	12650.8	8633.06	416.008	17.0331	1980-06-30	2442.36	2	0	0	0	0	0	0	0	2	15
1	1980-07-11	180	160	158	64	55	2858.37	2	3	11	12650.8	8633.06	416.008	17.0331	1980-06-30	2442.36	2	0	0	0	0	0	0	0	2	15
1	1980-06-30	180	150	159	89	83	5971.47	2	1	0	21624.7	18028.4	0	0	1980-06-30	5971.47	2	0	0	0	0	0	0	0	2	15
1	1980-07-03	180	150	159	89	85	6111.14	16	2	3	27089.8	18449.9	139.679	2.3391	1980-06-30	5971.47	3	0	0	0	0	0	10	3	3	15
1	1980-07-07	200	160	159	93	85	6395.35	54	2	7	28351.4	19307.7	423.88	7.09843	1980-06-30	5971.47	4	0	0	0	0	0	10	40	4	15
1	1980-07-11	180	160	159	93	85	6395.35	54	3	11	28351.4	19307.7	423.88	7.09843	1980-06-30	5971.47	4	0	0	0	0	0	10	40	4	15
1	1980-06-30	180	150	160	54	51	2225.37	0	1	0	8045.16	6722.68	0	0	1980-06-30	2225.37	0	0	0	0	0	0	0	0	0	15
1	1980-07-03	180	150	160	68	66	3624.38	0	2	3	16051.1	10944.9	1399.01	62.8662	1980-06-30	2225.37	0	0	0	0	0	0	0	0	0	15
1	1980-07-07	200	160	160	78	76	4787.02	1	2	7	21212.1	14453.7	2561.65	115.111	1980-06-30	2225.37	1	0	0	0	0	0	0	0	1	15
1	1980-07-11	180	160	160	80	79	5102.91	4	2	11	22614.3	15407.1	2877.54	129.306	1980-06-30	2225.37	4	0	0	0	0	0	0	0	4	15
1	1980-07-15	170	150	160	82	81	5362.89	5	2	15	23768.4	16191.7	3137.52	140.989	1980-06-30	2225.37	5	0	0	0	0	0	0	0	5	15
1	1980-07-18	180	150	160	84	82	5562.12	5	2	18	24652.7	16793	3336.75	149.941	1980-06-30	2225.37	5	0	0	0	0	0	0	0	5	15
1	1980-07-21	160	150	160	84	83	5629.33	10	2	21	24951.1	16995.8	3403.96	152.961	1980-06-30	2225.37	10	0	0	0	0	0	0	0	10	15
1	1980-07-25	180	150	160	84	83	5629.33	21	2	25	24951.1	16995.8	3403.96	152.961	1980-06-30	2225.37	15	0	0	0	0	0	5	1	15	15
1	1980-07-29	250	150	160	85	84	5764.98	85	2	29	25553.2	17405.2	3539.6	159.057	1980-06-30	2225.37	15	0	0	0	0	0	20	50	15	15
1	1980-08-01	250	200	160	85	84	5764.98	85	3	32	25200.3	17405.2	3539.6	159.057	1980-06-30	2225.37	15	0	0	0	0	0	20	50	15	15
1	1980-06-30	180	150	161	75	75	4541.58	10	1	0	16441.4	13713	0	0	1980-06-30	4541.58	5	0	0	0	0	0	0	5	5	15
1	1980-07-03	180	150	161	75	75	4541.58	27	2	3	20122.5	13713	0	0	1980-06-30	4541.58	15	0	0	0	0	0	2	10	15	15
1	1980-07-07	200	160	161	75	75	4541.58	27	3	7	20122.5	13713	0	0	1980-06-30	4541.58	15	0	0	0	0	0	2	10	15	15
1	1980-06-30	180	150	162	48	45	1745.78	10	1	0	6306.64	5275.27	0	0	1980-06-30	1745.78	0	0	10	0	0	0	0	0	10	15
1	1980-07-03	180	150	162	48	45	1745.78	18	2	3	7712	5275.27	0	0	1980-06-30	1745.78	0	0	15	0	0	0	3	0	15	15
1	1980-07-07	200	160	162	48	45	1745.78	18	3	7	7712	5275.27	0	0	1980-06-30	1745.78	0	0	15	0	0	0	3	0	15	15
1	1980-06-30	180	150	163	48	47	1821.68	0	1	0	6581.76	5504.33	0	0	1980-06-30	1821.68	0	0	0	0	0	0	0	0	0	15
1	1980-07-03	180	150	163	61	61	3004.3	0	2	3	13298.6	9073.49	1182.63	64.9197	1980-06-30	1821.68	0	0	0	0	0	0	0	0	0	15
1	1980-07-07	200	160	163	66	66	3517	1	2	7	15574.4	10620.8	1695.32	93.0637	1980-06-30	1821.68	1	0	0	0	0	0	0	0	1	15
1	1980-07-11	180	160	163	66	66	3517	1	2	11	15574.4	10620.8	1695.32	93.0637	1980-06-30	1821.68	1	0	0	0	0	0	0	0	1	15
1	1980-07-15	170	150	163	68	68	3733.38	3	2	15	16534.9	11273.8	1911.7	104.942	1980-06-30	1821.68	3	0	0	0	0	0	0	0	3	15
1	1980-07-18	180	150	163	68	69	3788.48	3	2	18	16779.5	11440.1	1966.8	107.967	1980-06-30	1821.68	3	0	0	0	0	0	0	0	3	15
1	1980-07-21	160	150	163	68	69	3788.48	9	2	21	16779.5	11440.1	1966.8	107.967	1980-06-30	1821.68	4	0	0	0	0	0	5	0	4	15
1	1980-07-25	180	150	163	68	69	3788.48	69	2	25	16779.5	11440.1	1966.8	107.967	1980-06-30	1821.68	4	0	0	0	0	0	15	50	4	15
1	1980-07-29	250	150	163	68	69	3788.48	69	3	29	16779.5	11440.1	1966.8	107.967	1980-06-30	1821.68	4	0	0	0	0	0	15	50	4	15
1	1980-06-30	180	150	164	74	61	3678.68	0	1	0	13313.4	11108.8	0	0	1980-06-30	3678.68	0	0	0	0	0	0	0	0	0	15
1	1980-07-03	180	150	164	77	67	4185.52	1	2	3	18542	12638.4	506.84	13.7778	1980-06-30	3678.68	1	0	0	0	0	0	0	0	1	15
1	1980-07-07	200	160	164	82	69	4602.33	3	2	7	20392.2	13896.3	923.656	25.1084	1980-06-30	3678.68	3	0	0	0	0	0	0	0	3	15
1	1980-07-11	180	160	164	83	69	4663.49	28	2	11	20663.7	14080.9	984.815	26.7709	1980-06-30	3678.68	3	0	0	0	0	0	25	0	3	15
1	1980-07-15	170	150	164	83	69	4663.49	28	3	15	20663.7	14080.9	984.815	26.7709	1980-06-30	3678.68	3	0	0	0	0	0	25	0	3	15
1	1980-07-03	180	150	165	75	62	3788.48	0	1	0	16779.5	11440.1	0	0	1980-07-03	3788.48	0	0	0	0	0	0	0	0	0	15
1	1980-07-07	200	160	165	91	76	5629.33	0	2	4	24951.1	16995.8	1840.85	48.5908	1980-07-03	3788.48	0	0	0	0	0	0	0	0	0	15
1	1980-07-11	180	160	165	94	80	6111.14	1	2	8	27089.8	18449.9	2322.66	61.3085	1980-07-03	3788.48	0	0	1	0	0	0	0	0	1	15
1	1980-07-15	170	150	165	96	82	6395.35	2	2	12	28351.4	19307.7	2606.86	68.8103	1980-07-03	3788.48	1	0	1	0	0	0	0	0	2	15
1	1980-07-18	180	150	165	96	82	6395.35	4	2	15	28351.4	19307.7	2606.86	68.8103	1980-07-03	3788.48	3	0	1	0	0	0	0	0	4	15
1	1980-07-21	160	150	165	96	82	6395.35	6	2	18	28351.4	19307.7	2606.86	68.8103	1980-07-03	3788.48	5	0	1	0	0	0	0	0	6	15
1	1980-07-25	180	150	165	87	84	5902.23	16	2	22	26162.5	17819.4	2113.75	55.7941	1980-07-03	3788.48	15	0	1	0	0	0	0	0	16	15
1	1980-07-29	250	150	165	97	84	6612.74	41	2	26	29316.4	19963.7	2824.25	74.5485	1980-07-03	3788.48	15	0	1	0	0	0	15	10	16	15
1	1980-08-01	250	200	165	97	84	6612.74	41	3	29	28909.3	19963.7	2824.25	74.5485	1980-07-03	3788.48	15	0	1	0	0	0	15	10	16	15
1	1980-07-03	180	150	166	61	54	2669.44	0	1	0	11812.1	8062.87	0	0	1980-07-03	2669.44	0	0	0	0	0	0	0	0	0	15
1	1980-07-07	200	160	166	80	73	4725.06	0	2	4	20937	14266.7	2055.62	77.0057	1980-07-03	2669.44	0	0	0	0	0	0	0	0	0	15
1	1980-07-11	180	160	166	85	77	5297.29	1	2	8	23477.2	15993.7	2627.86	98.4423	1980-07-03	2669.44	1	0	0	0	0	0	0	0	1	15
1	1980-07-15	170	150	166	87	78	5495.31	3	2	12	24356.1	16591.3	2825.87	105.86	1980-07-03	2669.44	3	0	0	0	0	0	0	0	3	15
1	1980-07-18	180	150	166	87	78	5495.31	5	2	15	24356.1	16591.3	2825.87	105.86	1980-07-03	2669.44	5	0	0	0	0	0	0	0	5	15
1	1980-07-21	160	150	166	87	78	5495.31	5	2	18	24356.1	16591.3	2825.87	105.86	1980-07-03	2669.44	5	0	0	0	0	0	0	0	5	15
1	1980-07-25	180	150	166	87	80	5629.33	5	2	22	24951.1	16995.8	2959.9	110.881	1980-07-03	2669.44	5	0	0	0	0	0	0	0	5	15
1	1980-07-29	250	150	166	89	80	5764.98	14	2	26	25553.2	17405.2	3095.54	115.962	1980-07-03	2669.44	10	0	0	0	0	0	1	3	10	15
1	1980-08-01	250	200	166	89	80	5764.98	14	3	29	25200.3	17405.2	3095.54	115.962	1980-07-03	2669.44	10	0	0	0	0	0	1	3	10	15
1	1980-07-03	180	150	167	81	75	4912.17	0	1	0	21767.6	14831.4	0	0	1980-07-03	4912.17	0	0	0	0	0	0	0	0	0	15
1	1980-07-07	200	160	167	85	79	5428.9	0	2	4	24061.4	16390.9	516.73	10.5194	1980-07-03	4912.17	0	0	0	0	0	0	0	0	0	15
1	1980-07-11	180	160	167	86	81	5629.33	0	2	8	24951.1	16995.8	717.165	14.5998	1980-07-03	4912.17	0	0	0	0	0	0	0	0	0	15
1	1980-07-15	170	150	167	87	82	5764.98	0	2	12	25553.2	17405.2	852.807	17.3611	1980-07-03	4912.17	0	0	0	0	0	0	0	0	0	15
1	1980-07-18	180	150	167	88	82	5833.4	0	2	15	25856.9	17611.7	921.233	18.7541	1980-07-03	4912.17	0	0	0	0	0	0	0	0	0	16
1	1980-07-21	160	150	167	88	82	5833.4	18	2	18	25856.9	17611.7	921.233	18.7541	1980-07-03	4912.17	0	0	0	0	0	0	15	3	0	16
1	1980-07-25	180	150	167	88	82	5833.4	18	3	22	25856.9	17611.7	921.233	18.7541	1980-07-03	4912.17	0	0	0	0	0	0	15	3	0	16
1	1980-07-03	180	150	168	73	66	3899.9	0	1	0	17274.1	11776.4	0	0	1980-07-03	3899.9	0	0	0	0	0	0	0	0	0	16
1	1980-07-07	200	160	168	82	75	4975.35	0	2	4	22048	15022.1	1075.45	27.5762	1980-07-03	3899.9	0	0	0	0	0	0	0	0	0	16
1	1980-07-11	180	160	168	82	78	5167.3	0	2	8	22900.1	15601.4	1267.4	32.4983	1980-07-03	3899.9	0	0	0	0	0	0	0	0	0	16
1	1980-07-15	170	150	168	86	79	5495.31	0	2	12	24356.1	16591.3	1595.41	40.9089	1980-07-03	3899.9	0	0	0	0	0	0	0	0	0	16
1	1980-07-18	180	150	168	86	82	5696.95	2	2	15	25251.2	17199.9	1797.05	46.0794	1980-07-03	3899.9	2	0	0	0	0	0	0	0	2	16
1	1980-07-21	160	150	168	86	82	5696.95	2	2	18	25251.2	17199.9	1797.05	46.0794	1980-07-03	3899.9	2	0	0	0	0	0	0	0	2	16
1	1980-07-25	180	150	168	86	82	5696.95	2	3	22	25251.2	17199.9	1797.05	46.0794	1980-07-03	3899.9	2	0	0	0	0	0	0	0	2	16
1	1980-07-03	180	150	169	54	53	2310.96	1	1	0	10220.8	6980.97	0	0	1980-07-03	2310.96	0	0	1	0	0	0	0	0	1	16
1	1980-07-07	200	160	169	61	62	3053.76	1	2	4	13518.1	9222.74	742.8	32.1425	1980-07-03	2310.96	0	0	1	0	0	0	0	0	1	16
1	1980-07-11	180	160	169	64	65	3358.95	3	2	8	14872.8	10143.8	1047.99	45.3489	1980-07-03	2310.96	2	0	1	0	0	0	0	0	3	16
1	1980-07-15	170	150	169	65	67	3517	10	2	12	15574.4	10620.8	1206.04	52.188	1980-07-03	2310.96	3	0	1	0	0	0	5	1	4	16
1	1980-07-18	180	150	169	65	67	3517	74	2	15	15574.4	10620.8	1206.04	52.188	1980-07-03	2310.96	3	0	1	0	0	0	10	60	4	16
1	1980-07-21	160	150	169	65	67	3517	74	3	18	15574.4	10620.8	1206.04	52.188	1980-07-03	2310.96	3	0	1	0	0	0	10	60	4	16
1	1980-07-03	180	150	170	63	60	3053.76	0	1	0	13518.1	9222.74	0	0	1980-07-03	3053.76	0	0	0	0	0	0	0	0	0	16
1	1980-07-07	200	160	170	64	62	3204.54	0	2	4	14187.4	9677.79	150.78	4.93754	1980-07-03	3053.76	0	0	0	0	0	0	0	0	0	16
1	1980-07-11	180	160	170	64	62	3204.54	0	3	8	14187.4	9677.79	150.78	4.93754	1980-07-03	3053.76	0	0	0	0	0	0	0	0	0	16
1	1980-07-03	180	150	171	46	40	1492.87	0	1	0	6589.3	4511.98	0	0	1980-07-03	1492.87	0	0	0	0	0	0	0	0	0	16
1	1980-07-07	200	160	171	52	44	1860.23	0	2	4	8220.03	5620.68	367.363	24.6079	1980-07-03	1492.87	0	0	0	0	0	0	0	0	0	16
1	1980-07-11	180	160	171	55	46	2059.05	2	2	8	9102.59	6220.72	566.183	37.9259	1980-07-03	1492.87	2	0	0	0	0	0	0	0	2	16
1	1980-07-15	170	150	171	55	48	2141.4	16	2	12	9468.16	6469.26	648.537	43.4424	1980-07-03	1492.87	6	0	0	0	0	0	10	0	6	16
1	1980-07-18	180	150	171	55	48	2141.4	51	2	15	9468.16	6469.26	648.537	43.4424	1980-07-03	1492.87	6	0	0	0	0	0	20	25	6	16
1	1980-07-21	160	150	171	55	48	2141.4	51	3	18	9468.16	6469.26	648.537	43.4424	1980-07-03	1492.87	6	0	0	0	0	0	20	25	6	16
1	1980-07-07	200	160	172	74	55	3358.95	0	1	0	14872.8	10143.8	0	0	1980-07-07	3358.95	0	0	0	0	0	0	0	0	0	16
1	1980-07-11	180	160	172	79	70	4481.22	2	2	4	19854.6	13530.8	1122.27	33.4115	1980-07-07	3358.95	2	0	0	0	0	0	0	0	2	16
1	1980-07-15	170	150	172	81	72	4725.06	3	2	8	20937	14266.7	1366.11	40.6706	1980-07-07	3358.95	3	0	0	0	0	0	0	0	3	16
1	1980-07-18	180	150	172	81	73	4787.02	5	2	11	21212.1	14453.7	1428.07	42.5155	1980-07-07	3358.95	5	0	0	0	0	0	0	0	5	16
1	1980-07-21	160	150	172	83	73	4912.17	24	2	14	21767.6	14831.4	1553.22	46.2412	1980-07-07	3358.95	5	0	0	0	0	0	15	4	5	16
1	1980-07-25	180	150	172	83	73	4912.17	24	3	18	21767.6	14831.4	1553.22	46.2412	1980-07-07	3358.95	5	0	0	0	0	0	15	4	5	16
1	1980-07-07	200	160	173	51	47	1938.55	1	1	0	8567.68	5857.04	0	0	1980-07-07	1938.55	1	0	0	0	0	0	0	0	1	16
1	1980-07-11	180	160	173	62	59	2955.25	3	2	4	13080.8	8925.46	1016.71	52.4469	1980-07-07	1938.55	3	0	0	0	0	0	0	0	3	16
1	1980-07-15	170	150	173	65	62	3255.6	4	2	8	14414.1	9831.92	1317.06	67.9404	1980-07-07	1938.55	4	0	0	0	0	0	0	0	4	16
1	1980-07-18	180	150	173	65	63	3307.07	7	2	11	14642.6	9987.26	1368.53	70.5956	1980-07-07	1938.55	7	0	0	0	0	0	0	0	7	16
1	1980-07-21	160	150	173	67	64	3463.91	8	2	14	15338.8	10460.6	1525.36	78.686	1980-07-07	1938.55	8	0	0	0	0	0	0	0	8	16
1	1980-07-25	180	150	173	67	65	3517	18	2	18	15574.4	10620.8	1578.45	81.4244	1980-07-07	1938.55	8	0	0	0	0	0	10	0	8	16
1	1980-07-29	250	150	173	67	65	3517	28	2	22	15574.4	10620.8	1578.45	81.4244	1980-07-07	1938.55	8	0	0	0	0	0	0	20	8	16
1	1980-08-01	250	200	173	67	65	3517	43	2	25	15365.4	10620.8	1578.45	81.4244	1980-07-07	1938.55	8	0	0	0	0	0	9	26	8	16
1	1980-08-04	260	210	173	67	65	3517	43	3	28	15365.4	10620.8	1578.45	81.4244	1980-07-07	1938.55	8	0	0	0	0	0	9	26	8	16
1	1980-07-07	200	160	174	61	61	3004.3	0	1	0	13298.6	9073.49	0	0	1980-07-07	3004.3	0	0	0	0	0	0	0	0	0	16
1	1980-07-11	180	160	174	67	67	3624.38	1	2	4	16051.1	10944.9	620.076	20.6396	1980-07-07	3004.3	1	0	0	0	0	0	0	0	1	16
1	1980-07-15	170	150	174	68	69	3788.48	3	2	8	16779.5	11440.1	784.179	26.1019	1980-07-07	3004.3	3	0	0	0	0	0	0	0	3	16
1	1980-07-18	180	150	174	70	70	3956.22	4	2	11	17524.1	11946.4	951.914	31.685	1980-07-07	3004.3	4	0	0	0	0	0	0	0	4	16
1	1980-07-21	160	150	174	70	71	4012.94	5	2	14	17775.9	12117.5	1008.63	33.573	1980-07-07	3004.3	5	0	0	0	0	0	0	0	5	16
1	1980-07-25	180	150	174	72	72	4185.52	10	2	18	18542	12638.4	1181.21	39.3174	1980-07-07	3004.3	7	3	0	0	0	0	0	0	10	16
1	1980-07-29	250	150	174	72	72	4185.52	30	2	22	18542	12638.4	1181.21	39.3174	1980-07-07	3004.3	7	3	0	0	0	0	10	10	10	16
1	1980-08-01	250	200	174	72	72	4185.52	30	3	25	18290.2	12638.4	1181.21	39.3174	1980-07-07	3004.3	7	3	0	0	0	0	10	10	10	16
1	1980-07-07	200	160	175	39	41	1291.83	0	1	0	5696.89	3905.24	0	0	1980-07-07	1291.83	0	0	0	0	0	0	0	0	0	16
1	1980-07-11	180	160	175	53	56	2398.15	2	2	4	10607.9	7244.13	1106.33	85.6406	1980-07-07	1291.83	1	0	1	0	0	0	0	0	2	16
1	1980-07-15	170	150	175	59	64	3053.76	3	2	8	13518.1	9222.74	1761.93	136.391	1980-07-07	1291.83	2	0	1	0	0	0	0	0	3	16
1	1980-07-18	180	150	175	63	65	3307.07	3	2	11	14642.6	9987.26	2015.25	156	1980-07-07	1291.83	2	0	1	0	0	0	0	0	3	16
1	1980-07-21	160	150	175	65	69	3624.38	4	2	14	16051.1	10944.9	2332.55	180.562	1980-07-07	1291.83	3	0	1	0	0	0	0	0	4	16
1	1980-07-25	180	150	175	65	70	3678.68	9	2	18	16292.1	11108.8	2386.85	184.766	1980-07-07	1291.83	3	0	1	0	0	0	5	0	4	16
1	1980-07-29	250	150	175	66	71	3788.48	24	2	22	16779.5	11440.1	2496.66	193.266	1980-07-07	1291.83	3	0	1	0	0	0	5	15	4	16
1	1980-08-01	250	200	175	66	71	3788.48	39	2	25	16553.2	11440.1	2496.66	193.266	1980-07-07	1291.83	3	0	1	0	0	0	0	35	4	16
1	1980-08-04	260	210	175	66	71	3788.48	39	3	28	16553.2	11440.1	2496.66	193.266	1980-07-07	1291.83	3	0	1	0	0	0	0	35	4	16
1	1980-07-07	200	160	176	87	83	5833.4	2	1	0	25856.9	17611.7	0	0	1980-07-07	5833.4	1	0	1	0	0	0	0	0	2	16
1	1980-07-11	180	160	176	88	85	6041.1	2	2	4	26778.9	18238.6	207.701	3.56055	1980-07-07	5833.4	1	0	1	0	0	0	0	0	2	16
1	1980-07-15	170	150	176	88	85	6041.1	2	3	8	26778.9	18238.6	207.701	3.56055	1980-07-07	5833.4	1	0	1	0	0	0	0	0	2	16
1	1980-07-07	200	160	177	80	75	4849.39	2	1	0	21488.9	14642	0	0	1980-07-07	4849.39	0	0	1	0	1	0	0	0	1	16
1	1980-07-11	180	160	177	80	75	4849.39	10	2	4	21488.9	14642	0	0	1980-07-07	4849.39	0	0	1	0	1	0	0	8	1	17
1	1980-07-15	170	150	177	80	75	4849.39	11	2	8	21488.9	14642	0	0	1980-07-07	4849.39	0	0	1	0	1	0	0	9	1	17
1	1980-07-18	180	150	177	80	76	4912.17	10	2	11	21767.6	14831.4	62.7747	1.29448	1980-07-07	4849.39	0	0	1	0	1	0	2	6	1	17
1	1980-07-21	160	150	177	80	76	4912.17	10	3	14	21767.6	14831.4	62.7747	1.29448	1980-07-07	4849.39	0	0	1	0	1	0	2	6	1	17
1	1980-07-07	200	160	178	64	58	3004.3	0	1	0	13298.6	9073.49	0	0	1980-07-07	3004.3	0	0	0	0	0	0	0	0	0	17
1	1980-07-11	180	160	178	72	66	3843.99	0	2	4	17025.9	11607.7	839.687	27.9495	1980-07-07	3004.3	0	0	0	0	0	0	0	0	0	17
1	1980-07-15	170	150	178	75	68	4127.59	5	2	8	18284.8	12463.6	1123.28	37.3891	1980-07-07	3004.3	5	0	0	0	0	0	0	0	5	17
1	1980-07-18	180	150	178	75	68	4127.59	5	2	11	18284.8	12463.6	1123.28	37.3891	1980-07-07	3004.3	5	0	0	0	0	0	0	0	5	17
1	1980-07-21	160	150	178	76	69	4243.85	7	2	14	18800.9	12814.4	1239.55	41.2591	1980-07-07	3004.3	7	0	0	0	0	0	0	0	7	17
1	1980-07-25	180	150	178	76	70	4302.59	8	2	18	19061.7	12991.7	1298.29	43.2142	1980-07-07	3004.3	8	0	0	0	0	0	0	0	8	17
1	1980-07-29	250	150	178	77	70	4361.73	10	2	22	19324.2	13170.2	1357.43	45.1827	1980-07-07	3004.3	10	0	0	0	0	0	0	0	10	17
1	1980-08-01	250	200	178	79	70	4481.22	10	2	25	19583.9	13530.8	1476.92	49.1602	1980-07-07	3004.3	10	0	0	0	0	0	0	0	10	17
1	1980-08-04	260	210	178	79	70	4481.22	75	2	28	19583.9	13530.8	1476.92	49.1602	1980-07-07	3004.3	10	0	0	0	0	0	60	5	10	17
1	1980-08-07	240	190	178	79	70	4481.22	100	2	31	19583.9	13530.8	1476.92	49.1602	1980-07-07	3004.3	10	0	0	0	0	0	0	90	10	17
1	1980-08-11	220	190	178	79	70	4481.22	100	3	35	19583.9	13530.8	1476.92	49.1602	1980-07-07	3004.3	10	0	0	0	0	0	0	90	10	17
1	1980-07-07	200	160	179	75	72	4361.73	0	1	0	19324.2	13170.2	0	0	1980-07-07	4361.73	0	0	0	0	0	0	0	0	0	17
1	1980-07-11	180	160	179	85	82	5629.33	1	2	4	24951.1	16995.8	1267.6	29.062	1980-07-07	4361.73	1	0	0	0	0	0	0	0	1	17
1	1980-07-15	170	150	179	88	86	6111.14	3	2	8	27089.8	18449.9	1749.41	40.1083	1980-07-07	4361.73	3	0	0	0	0	0	0	0	3	17
1	1980-07-18	180	150	179	90	86	6252.44	5	2	11	27717	18876.4	1890.71	43.3477	1980-07-07	4361.73	5	0	0	0	0	0	0	0	5	17
1	1980-07-21	160	150	179	90	88	6395.35	7	2	14	28351.4	19307.7	2033.62	46.6241	1980-07-07	4361.73	7	0	0	0	0	0	0	0	7	17
1	1980-07-25	180	150	179	90	88	6395.35	7	2	18	28351.4	19307.7	2033.62	46.6241	1980-07-07	4361.73	7	0	0	0	0	0	0	0	7	17
1	1980-07-29	250	150	179	91	88	6467.41	8	2	22	28671.3	19525.1	2105.68	48.2762	1980-07-07	4361.73	8	0	0	0	0	0	0	0	8	17
1	1980-08-01	250	200	179	93	89	6686.01	8	2	25	29229.8	20184.9	2324.28	53.288	1980-07-07	4361.73	8	0	0	0	0	0	0	0	8	17
1	1980-08-04	260	210	179	93	89	6686.01	15	2	28	29229.8	20184.9	2324.28	53.288	1980-07-07	4361.73	15	0	0	0	0	0	0	0	15	17
1	1980-08-07	240	190	179	93	89	6686.01	70	2	31	29229.8	20184.9	2324.28	53.288	1980-07-07	4361.73	15	0	0	55	0	0	0	0	70	17
1	1980-08-11	220	190	179	93	89	6686.01	70	3	35	29229.8	20184.9	2324.28	53.288	1980-07-07	4361.73	15	0	0	55	0	0	0	0	70	17
1	1980-07-07	200	160	180	74	69	4127.59	0	1	0	18284.8	12463.6	0	0	1980-07-07	4127.59	0	0	0	0	0	0	0	0	0	17
1	1980-07-11	180	160	180	89	82	5902.23	0	2	4	26162.5	17819.4	1774.65	42.9948	1980-07-07	4127.59	0	0	0	0	0	0	0	0	0	17
1	1980-07-15	170	150	180	93	87	6539.87	3	2	8	28992.9	19743.8	2412.28	58.443	1980-07-07	4127.59	3	0	0	0	0	0	0	0	3	17
1	1980-07-18	180	150	180	94	88	6686.01	3	2	11	29641.7	20184.9	2558.42	61.9835	1980-07-07	4127.59	3	0	0	0	0	0	0	0	3	17
1	1980-07-21	160	150	180	96	90	6983.13	5	2	14	30960.6	21081.6	2855.54	69.1819	1980-07-07	4127.59	5	0	0	0	0	0	0	0	5	17
1	1980-07-25	180	150	180	97	91	7134.11	5	2	18	31630.8	21537.2	3006.52	72.8397	1980-07-07	4127.59	5	0	0	0	0	0	0	0	5	17
1	1980-07-29	250	150	180	97	92	7210.21	5	2	22	31968.6	21766.9	3082.62	74.6834	1980-07-07	4127.59	5	0	0	0	0	0	0	0	5	17
1	1980-08-01	250	200	180	98	93	7363.61	5	2	25	32194.3	22229.9	3236.02	78.3999	1980-07-07	4127.59	5	0	0	0	0	0	0	0	5	17
1	1980-08-04	260	210	180	98	93	7363.61	14	2	28	32194.3	22229.9	3236.02	78.3999	1980-07-07	4127.59	8	0	0	0	1	0	3	2	8	17
1	1980-08-07	240	190	180	98	93	7363.61	14	3	31	32194.3	22229.9	3236.02	78.3999	1980-07-07	4127.59	8	0	0	0	1	0	3	2	8	17
1	1980-07-07	200	160	181	70	71	4012.94	1	1	0	17775.9	12117.5	0	0	1980-07-07	4012.94	1	0	0	0	0	0	0	0	1	17
1	1980-07-11	180	160	181	78	78	4912.17	1	2	4	21767.6	14831.4	899.232	22.4083	1980-07-07	4012.94	1	0	0	0	0	0	0	0	1	17
1	1980-07-15	170	150	181	80	81	5232.1	2	2	8	23187.7	15797	1219.16	30.3808	1980-07-07	4012.94	2	0	0	0	0	0	0	0	2	17
1	1980-07-18	180	150	181	81	82	5362.89	3	2	11	23768.4	16191.7	1349.96	33.6402	1980-07-07	4012.94	3	0	0	0	0	0	0	0	3	17
1	1980-07-21	160	150	181	81	83	5428.9	3	2	14	24061.4	16390.9	1415.96	35.2849	1980-07-07	4012.94	3	0	0	0	0	0	0	0	3	17
1	1980-07-25	180	150	181	82	83	5495.31	4	2	18	24356.1	16591.3	1482.37	36.9398	1980-07-07	4012.94	4	0	0	0	0	0	0	0	4	17
1	1980-07-29	250	150	181	82	83	5495.31	7	2	22	24356.1	16591.3	1482.37	36.9398	1980-07-07	4012.94	4	0	0	0	1	0	0	2	4	17
1	1980-08-01	250	200	181	82	83	5495.31	9	2	25	24020.5	16591.3	1482.37	36.9398	1980-07-07	4012.94	4	0	0	0	1	0	2	2	4	17
1	1980-08-04	260	210	181	82	83	5495.31	74	2	28	24020.5	16591.3	1482.37	36.9398	1980-07-07	4012.94	8	0	0	0	1	0	50	15	8	17
1	1980-08-07	240	190	181	82	83	5495.31	74	3	31	24020.5	16591.3	1482.37	36.9398	1980-07-07	4012.94	8	0	0	0	1	0	50	15	8	17
1	1980-07-11	180	160	182	71	62	3570.49	0	1	0	15811.9	10782.2	0	0	1980-07-11	3570.49	0	0	0	0	0	0	0	0	0	17
1	1980-07-15	170	150	182	83	72	4849.39	0	2	4	21488.9	14642	1278.91	35.8189	1980-07-11	3570.49	0	0	0	0	0	0	0	0	0	17
1	1980-07-18	180	150	182	86	76	5297.29	0	2	7	23477.2	15993.7	1726.81	48.3634	1980-07-11	3570.49	0	0	0	0	0	0	0	0	0	17
1	1980-07-21	160	150	182	88	78	5562.12	1	2	10	24652.7	16793	1991.63	55.7804	1980-07-11	3570.49	1	0	0	0	0	0	0	0	1	17
1	1980-07-25	180	150	182	91	79	5833.4	37	2	14	25856.9	17611.7	2262.92	63.3784	1980-07-11	3570.49	2	0	0	0	0	0	10	25	2	17
1	1980-07-29	250	150	182	91	79	5833.4	12	2	18	25856.9	17611.7	2262.92	63.3784	1980-07-11	3570.49	2	0	0	0	0	0	0	10	2	17
1	1980-08-01	250	200	182	91	79	5833.4	27	2	21	25499.7	17611.7	2262.92	63.3784	1980-07-11	3570.49	2	0	0	0	0	0	10	15	2	17
1	1980-08-04	260	210	182	91	79	5833.4	27	3	24	25499.7	17611.7	2262.92	63.3784	1980-07-11	3570.49	2	0	0	0	0	0	10	15	2	17
1	1980-07-11	180	160	183	79	68	4361.73	0	1	0	19324.2	13170.2	0	0	1980-07-11	4361.73	0	0	0	0	0	0	0	0	0	17
1	1980-07-15	170	150	183	88	77	5495.31	1	2	4	24356.1	16591.3	1133.58	25.9892	1980-07-11	4361.73	1	0	0	0	0	0	0	0	1	17
1	1980-07-18	180	150	183	91	81	5971.47	2	2	7	26469.8	18028.4	1609.74	36.9059	1980-07-11	4361.73	2	0	0	0	0	0	0	0	2	17
1	1980-07-21	160	150	183	93	82	6181.59	2	2	10	27402.5	18662.5	1819.86	41.7234	1980-07-11	4361.73	2	0	0	0	0	0	0	0	2	17
1	1980-07-25	180	150	183	93	84	6323.69	9	2	14	28033.3	19091.4	1961.96	44.9813	1980-07-11	4361.73	2	2	2	0	0	0	0	3	6	17
1	1980-07-29	250	150	183	94	84	6395.35	35	2	18	28351.4	19307.7	2033.62	46.6241	1980-07-11	4361.73	4	4	2	0	0	0	0	25	10	17
1	1980-08-01	250	200	183	94	84	6395.35	15	2	21	27958.2	19307.7	2033.62	46.6241	1980-07-11	4361.73	4	4	2	0	0	0	0	5	10	17
1	1980-08-04	260	210	183	94	84	6395.35	15	3	24	27958.2	19307.7	2033.62	46.6241	1980-07-11	4361.73	4	4	2	0	0	0	0	5	10	18
1	1980-07-11	180	160	184	80	70	4541.58	1	1	0	20122.5	13713	0	0	1980-07-11	4541.58	0	0	1	0	0	0	0	0	1	18
1	1980-07-15	170	150	184	90	81	5902.23	2	2	4	26162.5	17819.4	1360.66	29.96	1980-07-11	4541.58	1	0	1	0	0	0	0	0	2	18
1	1980-07-18	180	150	184	95	85	6539.87	3	2	7	28992.9	19743.8	1998.29	44	1980-07-11	4541.58	2	0	1	0	0	0	0	0	3	18
1	1980-07-21	160	150	184	97	89	6983.13	3	2	10	30960.6	21081.6	2441.55	53.76	1980-07-11	4541.58	2	0	1	0	0	0	0	0	3	18
1	1980-07-25	180	150	184	100	91	7363.61	5	2	14	32649.5	22229.9	2822.03	62.1378	1980-07-11	4541.58	2	2	1	0	0	0	0	0	5	18
1	1980-07-29	250	150	184	100	92	7440.92	18	2	18	32992.7	22463.2	2899.34	63.84	1980-07-11	4541.58	2	2	1	0	0	0	10	3	5	18
1	1980-08-01	250	200	184	100	92	7440.92	17	2	21	32532.6	22463.2	2899.34	63.84	1980-07-11	4541.58	2	2	1	0	0	0	2	10	5	18
1	1980-08-04	260	210	184	100	92	7440.92	29	2	24	32532.6	22463.2	2899.34	63.84	1980-07-11	4541.58	2	2	1	0	0	0	6	18	5	18
1	1980-08-07	240	190	184	100	92	7440.92	29	3	27	32532.6	22463.2	2899.34	63.84	1980-07-11	4541.58	2	2	1	0	0	0	6	18	5	18
1	1980-07-11	180	160	185	51	47	1938.55	0	1	0	8567.68	5857.04	0	0	1980-07-11	1938.55	0	0	0	0	0	0	0	0	0	18
1	1980-07-15	170	150	185	66	61	3255.6	2	2	4	14414.1	9831.92	1317.06	67.9404	1980-07-11	1938.55	2	0	0	0	0	0	0	0	2	18
1	1980-07-18	180	150	185	68	64	3517	2	2	7	15574.4	10620.8	1578.45	81.4244	1980-07-11	1938.55	2	0	0	0	0	0	0	0	2	18
1	1980-07-21	160	150	185	68	66	3624.38	3	2	10	16051.1	10944.9	1685.83	86.9638	1980-07-11	1938.55	3	0	0	0	0	0	0	0	3	18
1	1980-07-25	180	150	185	69	67	3733.38	7	2	14	16534.9	11273.8	1794.83	92.5864	1980-07-11	1938.55	3	0	0	0	0	0	0	4	3	18
1	1980-07-29	250	150	185	69	67	3733.38	7	3	18	16534.9	11273.8	1794.83	92.5864	1980-07-11	1938.55	3	0	0	0	0	0	0	4	3	18
1	1980-07-11	180	160	186	70	65	3678.68	0	1	0	16292.1	11108.8	0	0	1980-07-11	3678.68	0	0	0	0	0	0	0	0	0	18
1	1980-07-15	170	150	186	82	78	5167.3	1	2	4	22900.1	15601.4	1488.63	40.4664	1980-07-11	3678.68	1	0	0	0	0	0	0	0	1	18
1	1980-07-18	180	150	186	84	80	5428.9	2	2	7	24061.4	16390.9	1750.22	47.5775	1980-07-11	3678.68	2	0	0	0	0	0	0	0	2	18
1	1980-07-21	160	150	186	86	82	5696.95	6	2	10	25251.2	17199.9	2018.28	54.8642	1980-07-11	3678.68	4	0	0	0	0	0	0	2	4	18
1	1980-07-25	180	150	186	87	82	5764.98	8	2	14	25553.2	17405.2	2086.3	56.7133	1980-07-11	3678.68	5	0	0	0	0	0	0	3	5	18
1	1980-07-29	250	150	186	87	82	5764.98	76	2	18	25553.2	17405.2	2086.3	56.7133	1980-07-11	3678.68	5	0	0	0	1	0	50	20	5	18
1	1980-08-01	250	200	186	87	82	5764.98	76	3	21	25200.3	17405.2	2086.3	56.7133	1980-07-11	3678.68	5	0	0	0	1	0	50	20	5	18
1	1980-07-11	180	160	187	51	51	2100.02	1	1	0	9284.48	6344.38	0	0	1980-07-11	2100.02	1	0	0	0	0	0	0	0	1	18
1	1980-07-15	170	150	187	60	60	2906.61	3	2	4	12864.9	8778.65	806.584	38.4083	1980-07-11	2100.02	3	0	0	0	0	0	0	0	3	18
1	1980-07-18	180	150	187	62	63	3153.87	4	2	7	13962.5	9524.89	1053.85	50.1826	1980-07-11	2100.02	4	0	0	0	0	0	0	0	4	18
1	1980-07-21	160	150	187	63	64	3255.6	6	2	10	14414.1	9831.92	1155.58	55.0269	1980-07-11	2100.02	6	0	0	0	0	0	0	0	6	18
1	1980-07-25	180	150	187	65	66	3463.91	7	2	14	15338.8	10460.6	1363.89	64.9462	1980-07-11	2100.02	7	0	0	0	0	0	0	0	7	18
1	1980-07-29	250	150	187	65	66	3463.91	11	2	18	15338.8	10460.6	1363.89	64.9462	1980-07-11	2100.02	8	0	0	0	0	0	0	3	8	18
1	1980-08-01	250	200	187	65	66	3463.91	11	3	21	15133.2	10460.6	1363.89	64.9462	1980-07-11	2100.02	8	0	0	0	0	0	0	3	8	18
1	1980-07-11	180	160	188	70	61	3463.91	3	1	0	15338.8	10460.6	0	0	1980-07-11	3463.91	2	0	1	0	0	0	0	0	3	18
1	1980-07-15	170	150	188	76	70	4302.59	4	2	4	19061.7	12991.7	838.678	24.2119	1980-07-11	3463.91	3	0	1	0	0	0	0	0	4	18
1	1980-07-18	180	150	188	80	73	4725.06	4	2	7	20937	14266.7	1261.15	36.4081	1980-07-11	3463.91	3	0	1	0	0	0	0	0	4	18
1	1980-07-21	160	150	188	81	75	4912.17	10	2	10	21767.6	14831.4	1448.26	41.8099	1980-07-11	3463.91	9	0	1	0	0	0	0	0	10	18
1	1980-07-25	180	150	188	83	77	5167.3	10	2	14	22900.1	15601.4	1703.39	49.1755	1980-07-11	3463.91	9	0	1	0	0	0	0	0	10	18
1	1980-07-29	250	150	188	83	77	5167.3	10	3	18	22900.1	15601.4	1703.39	49.1755	1980-07-11	3463.91	9	0	1	0	0	0	0	0	10	18
1	1980-07-11	180	160	189	59	58	2763.09	0	1	0	12227.8	8345.53	0	0	1980-07-11	2763.09	0	0	0	0	0	0	0	0	0	18
1	1980-07-15	170	150	189	67	66	3570.49	1	2	4	15811.9	10782.2	807.391	29.2205	1980-07-11	2763.09	0	0	1	0	0	0	0	0	1	18
1	1980-07-18	180	150	189	68	68	3733.38	3	2	7	16534.9	11273.8	970.282	35.1158	1980-07-11	2763.09	3	0	0	0	0	0	0	0	3	18
1	1980-07-21	160	150	189	69	69	3843.99	5	2	10	17025.9	11607.7	1080.89	39.119	1980-07-11	2763.09	4	0	1	0	0	0	0	0	5	18
1	1980-07-25	180	150	189	70	70	3956.22	6	2	14	17524.1	11946.4	1193.12	43.1807	1980-07-11	2763.09	4	0	1	0	0	0	0	1	5	18
1	1980-07-29	250	150	189	70	70	3956.22	13	2	18	17524.1	11946.4	1193.12	43.1807	1980-07-11	2763.09	4	0	1	0	0	0	3	5	5	18
1	1980-08-01	250	200	189	70	70	3956.22	13	3	21	17287	11946.4	1193.12	43.1807	1980-07-11	2763.09	4	0	1	0	0	0	3	5	5	18
1	1980-07-15	170	150	190	32	28	726.652	0	1	0	3188.08	2199.54	0	0	1980-07-15	726.652	0	0	0	0	0	0	0	0	0	18
1	1980-07-18	180	150	190	34	35	960.997	0	2	3	4228.34	2906.8	234.345	32.25	1980-07-15	726.652	0	0	0	0	0	0	0	0	0	18
1	1980-07-21	160	150	190	42	38	1291.83	2	2	6	5696.89	3905.24	565.174	77.7778	1980-07-15	726.652	0	0	2	0	0	0	0	0	2	18
1	1980-07-25	180	150	190	44	40	1424.24	5	2	10	6284.66	4304.86	697.586	96	1980-07-15	726.652	3	0	2	0	0	0	0	0	5	18
1	1980-07-29	250	150	190	44	49	1745.78	5	3	14	7712	5275.27	1019.13	140.25	1980-07-15	726.652	3	0	2	0	0	0	0	0	5	18
1	1980-07-15	170	150	191	76	78	4787.02	3	1	0	21212.1	14453.7	0	0	1980-07-15	4787.02	3	0	0	0	0	0	0	0	3	18
1	1980-07-18	180	150	191	77	79	4912.17	6	2	3	21767.6	14831.4	125.146	2.61427	1980-07-15	4787.02	6	0	0	0	0	0	0	0	6	18
1	1980-07-21	160	150	191	78	80	5038.93	6	2	6	22330.3	15214	251.906	5.26227	1980-07-15	4787.02	6	0	0	0	0	0	0	0	6	18
1	1980-07-25	180	150	191	78	81	5102.91	7	2	10	22614.3	15407.1	315.892	6.59892	1980-07-15	4787.02	6	0	0	0	1	0	0	0	6	18
1	1980-07-29	250	150	191	78	91	5764.98	41	2	14	25553.2	17405.2	977.953	20.4292	1980-07-15	4787.02	10	0	0	0	1	0	20	10	10	18
1	1980-08-01	250	200	191	78	81	5102.91	41	3	17	22303.8	15407.1	315.892	6.59892	1980-07-15	4787.02	10	0	0	0	1	0	20	10	10	18
1	1980-07-15	170	150	192	35	34	960.997	0	1	0	4228.34	2906.8	0	0	1980-07-15	960.997	0	0	0	0	0	0	0	0	0	18
1	1980-07-18	180	150	192	46	47	1745.78	1	2	3	7712	5275.27	784.784	81.6635	1980-07-15	960.997	1	0	0	0	0	0	0	0	1	18
1	1980-07-21	160	150	192	49	51	2018.48	1	2	6	8922.49	6098.27	1057.48	110.04	1980-07-15	960.997	1	0	0	0	0	0	0	0	1	18
1	1980-07-25	180	150	192	53	54	2310.96	1	2	10	10220.8	6980.97	1349.96	140.475	1980-07-15	960.997	1	0	0	0	0	0	0	0	1	18
1	1980-07-29	250	150	192	54	56	2442.36	1	2	14	10804.1	7377.54	1481.36	154.148	1980-07-15	960.997	1	0	0	0	0	0	0	0	1	18
1	1980-08-01	250	200	192	54	56	2442.36	91	2	17	10663.9	7377.54	1481.36	154.148	1980-07-15	960.997	1	0	0	90	0	0	0	0	91	18
1	1980-08-04	260	210	192	54	56	2442.36	91	3	20	10663.9	7377.54	1481.36	154.148	1980-07-15	960.997	1	0	0	90	0	0	0	0	91	18
1	1980-07-15	170	150	193	72	67	3899.9	1	1	0	17274.1	11776.4	0	0	1980-07-15	3899.9	1	0	0	0	0	0	0	0	1	19
1	1980-07-18	180	150	193	79	75	4787.02	5	2	3	21212.1	14453.7	887.121	22.7473	1980-07-15	3899.9	1	0	4	0	0	0	0	0	5	19
1	1980-07-21	160	150	193	82	77	5102.91	6	2	6	22614.3	15407.1	1203.01	30.8473	1980-07-15	3899.9	2	0	4	0	0	0	0	0	6	19
1	1980-07-25	180	150	193	82	78	5167.3	16	2	10	22900.1	15601.4	1267.4	32.4983	1980-07-15	3899.9	2	0	4	0	0	0	10	0	6	19
1	1980-07-29	250	150	193	82	78	5167.3	96	2	14	22900.1	15601.4	1267.4	32.4983	1980-07-15	3899.9	2	0	4	0	0	0	15	75	6	19
1	1980-08-01	250	200	193	82	78	5167.3	96	3	17	22585.5	15601.4	1267.4	32.4983	1980-07-15	3899.9	2	0	4	0	0	0	15	75	6	19
1	1980-07-15	170	150	194	47	43	1634.97	0	1	0	7220.09	4940.84	0	0	1980-07-15	1634.97	0	0	0	0	0	0	0	0	0	19
1	1980-07-18	180	150	194	50	47	1899.19	3	2	3	8392.96	5738.25	264.219	16.1605	1980-07-15	1634.97	3	0	0	0	0	0	0	0	3	19
1	1980-07-21	160	150	194	50	48	1938.55	19	2	6	8567.68	5857.04	303.579	18.5679	1980-07-15	1634.97	4	0	0	0	0	0	5	10	4	19
1	1980-07-25	180	150	194	50	48	1938.55	19	3	10	8567.68	5857.04	303.579	18.5679	1980-07-15	1634.97	4	0	0	0	0	0	5	10	4	19
1	1980-07-15	170	150	195	59	53	2531.98	0	1	0	11201.9	7648.02	0	0	1980-07-15	2531.98	0	0	0	0	0	0	0	0	0	19
1	1980-07-18	180	150	195	62	58	2906.61	1	2	3	12864.9	8778.65	374.63	14.7959	1980-07-15	2531.98	1	0	0	0	0	0	0	0	1	19
1	1980-07-21	160	150	195	65	60	3153.87	4	2	6	13962.5	9524.89	621.893	24.5615	1980-07-15	2531.98	4	0	0	0	0	0	0	0	4	19
1	1980-07-25	180	150	195	65	62	3255.6	40	2	10	14414.1	9831.92	723.624	28.5794	1980-07-15	2531.98	10	0	0	0	0	0	25	5	10	19
1	1980-07-29	250	150	195	65	62	3255.6	40	3	14	14414.1	9831.92	723.624	28.5794	1980-07-15	2531.98	10	0	0	0	0	0	25	5	10	19
1	1980-07-15	170	150	196	54	47	2059.05	0	1	0	9102.59	6220.72	0	0	1980-07-15	2059.05	0	0	0	0	0	0	0	0	0	19
1	1980-07-18	180	150	196	63	55	2810.53	0	2	3	12438.4	8488.68	751.479	36.4964	1980-07-15	2059.05	0	0	0	0	0	0	0	0	0	19
1	1980-07-21	160	150	196	66	59	3153.87	1	2	6	13962.5	9524.89	1094.82	53.1713	1980-07-15	2059.05	1	0	0	0	0	0	0	0	1	19
1	1980-07-25	180	150	196	66	59	3153.87	12	2	10	13962.5	9524.89	1094.82	53.1713	1980-07-15	2059.05	3	0	0	0	0	0	5	4	3	19
1	1980-07-29	250	150	196	66	59	3153.87	12	3	14	13962.5	9524.89	1094.82	53.1713	1980-07-15	2059.05	3	0	0	0	0	0	5	4	3	19
2	1980-07-15	170	150	197	40	40	1291.83	0	1	0	5696.89	3905.24	0	0	1980-07-15	1291.83	0	0	0	0	0	0	0	0	0	51
2	1980-07-18	180	150	197	45	47	1708.44	0	2	3	7546.24	5162.58	416.614	32.25	1980-07-15	1291.83	0	0	0	0	0	0	0	0	0	51
2	1980-07-21	160	150	197	47	48	1821.68	0	2	6	8048.89	5504.33	529.85	41.0156	1980-07-15	1291.83	0	0	0	0	0	0	0	0	0	51
2	1980-07-25	180	150	197	47	49	1860.23	70	2	10	8220.03	5620.68	568.403	44	1980-07-15	1291.83	0	0	0	0	0	0	10	60	0	51
2	1980-07-29	250	150	197	47	49	1860.23	70	3	14	8220.03	5620.68	568.403	44	1980-07-15	1291.83	0	0	0	0	0	0	10	60	0	51
1	1980-07-15	170	150	198	67	55	3570.49	0	1	0	15811.9	10782.2	0	0	1980-07-15	3570.49	0	0	0	0	0	0	0	0	0	19
1	1980-07-18	180	150	198	80	66	4663.49	0	2	3	20663.7	14080.9	1093.01	30.6122	1980-07-15	3570.49	0	0	0	0	0	0	0	0	0	19
1	1980-07-21	160	150	198	86	72	5038.93	3	2	6	22330.3	15214	1468.44	41.1273	1980-07-15	3570.49	3	0	0	0	0	0	0	0	3	19
1	1980-07-25	180	150	198	88	72	5833.4	4	2	10	25856.9	17611.7	2262.92	63.3784	1980-07-15	3570.49	3	0	0	0	0	0	0	1	3	19
1	1980-07-29	250	150	198	90	82	5971.47	48	2	14	26469.8	18028.4	2400.98	67.2452	1980-07-15	3570.49	3	0	0	25	0	0	0	20	28	19
1	1980-08-01	250	200	198	90	82	4185.52	48	3	17	18290.2	12638.4	615.03	17.2254	1980-07-15	3570.49	3	0	0	25	0	0	0	20	28	19
1	1980-07-15	170	150	199	55	54	2442.36	1	1	0	10804.1	7377.54	0	0	1980-07-15	2442.36	1	0	0	0	0	0	0	0	1	19
1	1980-07-18	180	150	199	57	55	2577.39	1	2	3	11403.5	7785.08	135.036	5.52893	1980-07-15	2442.36	1	0	0	0	0	0	0	0	1	19
1	1980-07-21	160	150	199	57	56	2577.39	23	2	6	11403.5	7785.08	135.036	5.52893	1980-07-15	2442.36	3	0	0	0	0	0	20	0	3	19
1	1980-07-25	180	150	199	58	56	2623.21	100	2	10	11606.9	7923.37	180.856	7.40496	1980-07-15	2442.36	3	0	0	0	0	0	0	97	3	19
1	1980-07-29	250	150	199	58	56	1745.78	100	3	14	7712	5275.27	-696.577	-28.5207	1980-07-15	2442.36	3	0	0	0	0	0	0	97	3	19
1	1980-07-15	170	150	200	34	35	1165.87	2	1	0	5137.78	3525.11	0	0	1980-07-15	1165.87	0	0	2	0	0	0	0	0	2	19
1	1980-07-18	180	150	200	41	42	1527.79	4	2	3	6744.31	4617.36	361.913	31.0422	1980-07-15	1165.87	4	0	0	0	0	0	0	0	4	19
1	1980-07-21	160	150	200	44	46	1671.5	6	2	6	7382.27	5051.1	505.629	43.3691	1980-07-15	1165.87	4	0	2	0	0	0	0	0	6	19
1	1980-07-25	180	150	200	44	47	1671.5	9	2	10	7382.27	5051.1	505.629	43.3691	1980-07-15	1165.87	5	0	2	0	0	0	2	0	7	19
1	1980-07-29	250	150	200	44	47	1938.55	9	3	14	8567.68	5857.04	772.673	66.2742	1980-07-15	1165.87	5	0	2	0	0	0	2	0	7	19
1	1980-07-15	170	150	201	60	54	3153.87	2	1	0	13962.5	9524.89	0	0	1980-07-15	3153.87	1	0	1	0	0	0	0	0	2	19
1	1980-07-18	180	150	201	71	65	4012.94	3	2	3	17775.9	12117.5	859.064	27.2384	1980-07-15	3153.87	1	0	2	0	0	0	0	0	3	19
1	1980-07-21	160	150	201	74	70	4302.59	3	2	6	19061.7	12991.7	1148.72	36.4224	1980-07-15	3153.87	1	0	2	0	0	0	0	0	3	19
1	1980-07-25	180	150	201	77	72	4481.22	4	2	10	19854.6	13530.8	1327.35	42.0864	1980-07-15	3153.87	1	0	2	0	0	0	0	1	3	19
1	1980-07-29	250	150	201	77	72	4481.22	27	2	14	19854.6	13530.8	1327.35	42.0864	1980-07-15	3153.87	2	0	3	0	0	0	2	20	5	19
1	1980-08-01	250	200	201	77	72	4481.22	10	2	17	19583.9	13530.8	1327.35	42.0864	1980-07-15	3153.87	2	0	3	0	0	0	0	5	5	19
1	1980-08-04	260	210	201	77	72	3255.6	10	3	20	14221.8	9831.92	101.731	3.2256	1980-07-15	3153.87	2	0	3	0	0	0	0	5	5	19
1	1980-07-15	170	150	202	56	50	2486.97	3	1	0	11002.1	7512.17	0	0	1980-07-15	2486.97	2	0	0	0	1	0	0	0	2	19
1	1980-07-18	180	150	202	60	55	2810.53	4	2	3	12438.4	8488.68	323.562	13.0103	1980-07-15	2486.97	3	0	0	0	1	0	0	0	3	19
1	1980-07-21	160	150	202	62	58	3004.3	5	2	6	13298.6	9073.49	517.336	20.8019	1980-07-15	2486.97	4	0	0	0	1	0	0	0	4	19
1	1980-07-25	180	150	202	66	60	3255.6	6	2	10	14414.1	9831.92	768.636	30.9066	1980-07-15	2486.97	5	0	0	0	1	0	0	0	5	19
1	1980-07-29	250	150	202	66	61	3255.6	8	2	14	14414.1	9831.92	768.636	30.9066	1980-07-15	2486.97	5	0	0	0	1	0	2	0	5	19
1	1980-08-01	250	200	202	66	61	2310.96	8	3	17	10089	6980.97	-176.011	-7.07735	1980-07-15	2486.97	5	0	0	0	1	0	2	0	5	19
1	1980-07-15	170	150	203	49	41	2141.4	1	1	0	9468.16	6469.26	0	0	1980-07-15	2141.4	1	0	0	0	0	0	0	0	1	19
1	1980-07-18	180	150	203	62	54	3307.07	2	2	3	14642.6	9987.26	1165.67	54.4349	1980-07-15	2141.4	1	0	1	0	0	0	0	0	2	19
1	1980-07-21	160	150	203	75	66	4243.85	2	2	6	18800.9	12814.4	2102.45	98.1808	1980-07-15	2141.4	1	0	1	0	0	0	0	0	2	19
1	1980-07-25	180	150	203	77	70	4541.58	3	2	10	20122.5	13713	2400.17	112.084	1980-07-15	2141.4	1	0	2	0	0	0	0	0	3	19
1	1980-07-29	250	150	203	80	73	4787.02	3	2	14	21212.1	14453.7	2645.62	123.546	1980-07-15	2141.4	1	0	2	0	0	0	0	0	3	19
1	1980-08-01	250	200	203	80	74	4787.02	3	2	17	20921.8	14453.7	2645.62	123.546	1980-07-15	2141.4	1	0	2	0	0	0	0	0	3	19
1	1980-08-04	260	210	203	82	74	4912.17	47	2	20	21469.3	14831.4	2770.76	129.39	1980-07-15	2141.4	4	0	2	0	1	0	20	20	6	19
1	1980-08-07	240	190	203	82	74	4912.17	96	2	23	21469.3	14831.4	2770.76	129.39	1980-07-15	2141.4	4	0	2	0	1	0	30	59	6	19
1	1980-08-11	220	190	203	82	74	3204.54	96	3	27	13998.4	9677.79	1063.13	49.6465	1980-07-15	2141.4	4	0	2	0	1	0	30	59	6	19
1	1980-07-18	180	150	204	42	44	1783.53	1	1	0	7879.55	5389.19	0	0	1980-07-18	1783.53	1	0	0	0	0	0	0	0	1	19
1	1980-07-21	160	150	204	47	52	2059.05	2	2	3	9102.59	6220.72	275.522	15.4482	1980-07-18	1783.53	2	0	0	0	0	0	0	0	2	19
1	1980-07-25	180	150	204	50	54	2183.19	2	2	7	9653.63	6595.36	399.659	22.4083	1980-07-18	1783.53	2	0	0	0	0	0	0	0	2	19
1	1980-07-29	250	150	204	50	54	2183.19	2	3	11	9653.63	6595.36	399.659	22.4083	1980-07-18	1783.53	2	0	0	0	0	0	0	0	2	20
1	1980-07-18	180	150	205	41	43	1424.24	2	1	0	6284.66	4304.86	0	0	1980-07-18	1424.24	0	0	2	0	0	0	0	0	2	20
1	1980-07-21	160	150	205	47	51	1938.55	3	2	3	8567.68	5857.04	514.308	36.1111	1980-07-18	1424.24	0	0	3	0	0	0	0	0	3	20
1	1980-07-25	180	150	205	52	57	2398.15	3	2	7	10607.9	7244.13	973.916	68.3815	1980-07-18	1424.24	0	0	3	0	0	0	0	0	3	20
1	1980-07-29	250	150	205	54	50	2183.19	3	2	11	9653.63	6595.36	758.948	53.288	1980-07-18	1424.24	0	0	3	0	0	0	0	0	3	20
1	1980-08-01	250	200	205	55	62	2763.09	3	2	14	12067.1	8345.53	1338.86	94.0051	1980-07-18	1424.24	0	0	3	0	0	0	0	0	3	20
1	1980-08-04	260	210	205	56	62	2810.53	14	2	17	12274.6	8488.68	1386.29	97.3356	1980-07-18	1424.24	4	2	3	0	0	0	0	5	9	20
1	1980-08-07	240	190	205	56	62	2810.53	14	3	20	12274.6	8488.68	1386.29	97.3356	1980-07-18	1424.24	4	2	3	0	0	0	0	5	9	20
1	1980-07-21	160	150	206	58	52	2442.36	0	1	0	10804.1	7377.54	0	0	1980-07-21	2442.36	0	0	0	0	0	0	0	0	0	20
1	1980-07-25	180	150	206	75	72	4361.73	0	2	4	19324.2	13170.2	1919.37	78.5868	1980-07-21	2442.36	0	0	0	0	0	0	0	0	0	20
1	1980-07-29	250	150	206	79	80	5102.91	1	2	8	22614.3	15407.1	2660.56	108.934	1980-07-21	2442.36	1	0	0	0	0	0	0	0	1	20
1	1980-08-01	250	200	206	79	81	5167.3	5	2	11	22585.5	15601.4	2724.95	111.57	1980-07-21	2442.36	5	0	0	0	0	0	0	0	5	20
1	1980-08-04	260	210	206	82	84	5562.12	22	2	14	24312.8	16793	3119.76	127.736	1980-07-21	2442.36	20	0	0	0	0	0	0	2	20	20
1	1980-08-07	240	190	206	82	84	5562.12	22	3	17	24312.8	16793	3119.76	127.736	1980-07-21	2442.36	20	0	0	0	0	0	0	2	20	20
1	1980-07-21	160	150	207	73	62	3678.68	0	1	0	16292.1	11108.8	0	0	1980-07-21	3678.68	0	0	0	0	0	0	0	0	0	20
1	1980-07-25	180	150	207	93	65	5038.93	0	2	4	22330.3	15214	1360.25	36.9767	1980-07-21	3678.68	0	0	0	0	0	0	0	0	0	20
1	1980-07-29	250	150	207	99	93	7440.92	1	2	8	32992.7	22463.2	3762.24	102.272	1980-07-21	3678.68	0	0	0	0	1	0	0	0	0	20
1	1980-08-01	250	200	207	99	95	7596.74	6	2	11	33214.3	22933.5	3918.07	106.508	1980-07-21	3678.68	0	0	5	0	1	0	0	0	5	20
1	1980-08-04	260	210	207	102	95	7833.51	15	2	14	34250.2	23648	4154.84	112.944	1980-07-21	3678.68	2	0	5	0	1	0	5	2	7	20
1	1980-08-07	240	190	207	103	95	7913.24	21	2	17	34599	23888.7	4234.56	115.111	1980-07-21	3678.68	5	0	5	0	1	0	5	5	10	20
1	1980-08-11	220	190	207	103	95	7913.24	21	3	21	34599	23888.7	4234.56	115.111	1980-07-21	3678.68	5	0	5	0	1	0	5	5	10	20
1	1980-07-21	160	150	208	50	47	1899.19	1	1	0	8392.96	5738.25	0	0	1980-07-21	1899.19	0	0	1	0	0	0	0	0	1	20
1	1980-07-25	180	150	208	65	65	3411.23	1	2	4	15104.9	10301.6	1512.04	79.6153	1980-07-21	1899.19	0	0	1	0	0	0	0	0	1	20
1	1980-07-29	250	150	208	69	72	4012.94	1	2	8	17775.9	12117.5	2113.75	111.298	1980-07-21	1899.19	0	0	1	0	0	0	0	0	1	20
1	1980-08-01	250	200	208	71	73	4185.52	2	2	11	18290.2	12638.4	2286.33	120.385	1980-07-21	1899.19	1	0	1	0	0	0	0	0	2	20
1	1980-08-04	260	210	208	71	73	4185.52	16	2	14	18290.2	12638.4	2286.33	120.385	1980-07-21	1899.19	3	0	1	0	0	0	8	4	4	20
1	1980-08-07	240	190	208	71	73	4185.52	34	2	17	18290.2	12638.4	2286.33	120.385	1980-07-21	1899.19	3	0	1	0	0	0	5	25	4	20
1	1980-08-11	220	190	208	71	73	4185.52	94	2	21	18290.2	12638.4	2286.33	120.385	1980-07-21	1899.19	3	0	1	0	0	0	40	50	4	20
1	1980-08-14	220	190	208	71	73	4185.52	94	3	24	18290.2	12638.4	2286.33	120.385	1980-07-21	1899.19	3	0	1	0	0	0	40	50	4	20
1	1980-07-21	160	150	209	61	53	2623.21	3	1	0	11606.9	7923.37	0	0	1980-07-21	2623.21	0	0	3	0	0	0	0	0	3	20
1	1980-07-25	180	150	209	68	61	3358.95	3	2	4	14872.8	10143.8	735.735	28.0471	1980-07-21	2623.21	0	0	3	0	0	0	0	0	3	20
1	1980-07-29	250	150	209	71	64	3678.68	4	2	8	16292.1	11108.8	1055.46	40.2355	1980-07-21	2623.21	1	0	3	0	0	0	0	0	4	20
1	1980-08-01	250	200	209	71	64	3678.68	4	3	11	16072.8	11108.8	1055.46	40.2355	1980-07-21	2623.21	1	0	3	0	0	0	0	0	4	20
1	1980-07-25	180	150	210	78	73	4602.33	0	1	0	20392.2	13896.3	0	0	1980-07-25	4602.33	0	0	0	0	0	0	0	0	0	20
1	1980-07-29	250	150	210	89	90	6467.41	0	2	4	28671.3	19525.1	1865.07	40.5245	1980-07-25	4602.33	0	0	0	0	0	0	0	0	0	20
1	1980-08-01	250	200	210	89	90	6467.41	0	3	7	28273.4	19525.1	1865.07	40.5245	1980-07-25	4602.33	0	0	0	0	0	0	0	0	0	20
1	1980-07-25	180	150	211	58	57	2669.44	2	1	0	11812.1	8062.87	0	0	1980-07-25	2669.44	2	0	0	0	0	0	0	0	2	20
1	1980-07-29	250	150	211	60	59	2858.37	6	2	4	12650.8	8633.06	188.93	7.0775	1980-07-25	2669.44	3	3	0	0	0	0	0	0	6	20
1	1980-08-01	250	200	211	63	63	3204.54	23	2	7	13998.4	9677.79	535.099	20.0454	1980-07-25	2669.44	3	3	17	0	0	0	0	0	23	20
1	1980-08-04	260	210	211	63	63	3204.54	23	3	10	13998.4	9677.79	535.099	20.0454	1980-07-25	2669.44	3	3	17	0	0	0	0	0	23	20
1	1980-07-25	180	150	212	76	72	4421.27	0	1	0	19588.5	13349.9	0	0	1980-07-25	4421.27	0	0	0	0	0	0	0	0	0	20
1	1980-07-29	250	150	212	90	85	6181.59	0	2	4	27402.5	18662.5	1760.31	39.8146	1980-07-25	4421.27	0	0	0	0	0	0	0	0	0	20
1	1980-08-01	250	200	212	90	85	6181.59	0	3	7	27023	18662.5	1760.31	39.8146	1980-07-25	4421.27	0	0	0	0	0	0	0	0	0	20
2	1980-07-25	180	150	213	28	29	655.804	0	1	0	2873.58	1985.72	0	0	1980-07-25	655.804	0	0	0	0	0	0	0	0	0	51
2	1980-07-29	250	150	213	28	29	655.804	0	3	4	2873.58	1985.72	0	0	1980-07-25	655.804	0	0	0	0	0	0	0	0	0	51
1	1980-07-25	180	150	214	48	44	1708.44	0	1	0	7546.24	5162.58	0	0	1980-07-25	1708.44	0	0	0	0	0	0	0	0	0	20
1	1980-07-29	250	150	214	66	62	3307.07	1	2	4	14642.6	9987.26	1598.63	93.5728	1980-07-25	1708.44	1	0	0	0	0	0	0	0	1	20
1	1980-08-01	250	200	214	68	64	3517	53	2	7	15365.4	10620.8	1808.56	105.86	1980-07-25	1708.44	1	0	1	50	1	0	0	0	52	20
1	1980-08-04	260	210	214	70	66	3733.38	53	2	10	16312.1	11273.8	2024.94	118.526	1980-07-25	1708.44	1	0	1	50	1	0	0	0	52	20
1	1980-08-07	240	190	214	70	66	3733.38	53	2	13	16312.1	11273.8	2024.94	118.526	1980-07-25	1708.44	1	0	1	50	1	0	0	0	52	20
1	1980-08-11	220	190	214	70	66	3733.38	55	2	17	16312.1	11273.8	2024.94	118.526	1980-07-25	1708.44	1	0	1	50	1	0	0	2	52	20
1	1980-08-14	220	190	214	70	67	3788.48	53	2	20	16553.2	11440.1	2080.04	121.751	1980-07-25	1708.44	1	0	1	50	1	0	0	0	52	20
1	1980-08-18	220	190	214	70	67	3788.48	53	2	24	16553.2	11440.1	2080.04	121.751	1980-07-25	1708.44	1	0	1	50	1	0	0	0	52	20
1	1980-08-21	220	190	214	70	67	3788.48	53	3	27	16553.2	11440.1	2080.04	121.751	1980-07-25	1708.44	1	0	1	50	1	0	0	0	52	20
1	1980-07-25	180	150	215	56	52	2354.35	3	1	0	10413.4	7111.94	0	0	1980-07-25	2354.35	3	0	0	0	0	0	0	0	3	20
1	1980-07-29	250	150	215	57	53	2442.36	3	2	4	10804.1	7377.54	88.0056	3.738	1980-07-25	2354.35	3	0	0	0	0	0	0	0	3	20
1	1980-08-01	250	200	215	57	53	2442.36	3	3	7	10663.9	7377.54	88.0056	3.738	1980-07-25	2354.35	3	0	0	0	0	0	0	0	3	20
1	1980-07-25	180	150	216	60	60	2906.61	0	1	0	12864.9	8778.65	0	0	1980-07-25	2906.61	0	0	0	0	0	0	0	0	0	20
1	1980-07-29	250	150	216	70	69	3899.9	1	2	4	17274.1	11776.4	993.293	34.1736	1980-07-25	2906.61	1	0	0	0	0	0	0	0	1	20
1	1980-08-01	250	200	216	71	69	3956.22	2	2	7	17287	11946.4	1049.61	36.1111	1980-07-25	2906.61	2	0	0	0	0	0	0	0	2	20
1	1980-08-04	260	210	216	72	71	4127.59	4	2	10	18036.7	12463.6	1220.98	42.0069	1980-07-25	2906.61	4	0	0	0	0	0	0	0	4	20
1	1980-08-07	240	190	216	72	72	4185.52	7	2	13	18290.2	12638.4	1278.91	44	1980-07-25	2906.61	4	0	3	0	0	0	0	0	7	20
1	1980-08-11	220	190	216	72	72	4185.52	16	2	17	18290.2	12638.4	1278.91	44	1980-07-25	2906.61	10	0	3	0	0	0	3	0	13	20
1	1980-08-14	220	190	216	73	72	4243.85	38	2	20	18545.4	12814.4	1337.24	46.0069	1980-07-25	2906.61	10	0	3	15	0	0	5	5	28	21
1	1980-08-18	220	190	216	73	72	4243.85	63	2	24	18545.4	12814.4	1337.24	46.0069	1980-07-25	2906.61	10	0	3	15	0	0	0	35	28	21
1	1980-08-21	220	190	216	73	72	4243.85	63	3	27	18545.4	12814.4	1337.24	46.0069	1980-07-25	2906.61	10	0	3	15	0	0	0	35	28	21
1	1980-07-25	180	150	217	62	59	2955.25	0	1	0	13080.8	8925.46	0	0	1980-07-25	2955.25	0	0	0	0	0	0	0	0	0	21
1	1980-07-29	250	150	217	66	63	3358.95	3	2	4	14872.8	10143.8	403.696	13.6603	1980-07-25	2955.25	1	2	0	0	0	0	0	0	3	21
1	1980-08-01	250	200	217	68	64	3517	10	2	7	15365.4	10620.8	561.742	19.0083	1980-07-25	2955.25	8	2	0	0	0	0	0	0	10	21
1	1980-08-04	260	210	217	68	64	3517	41	2	10	15365.4	10620.8	561.742	19.0083	1980-07-25	2955.25	18	2	0	0	0	0	15	6	20	21
1	1980-08-07	240	190	217	68	64	3517	80	2	13	15365.4	10620.8	561.742	19.0083	1980-07-25	2955.25	38	2	0	0	0	0	20	20	40	21
1	1980-08-11	220	190	217	68	64	3517	80	3	17	15365.4	10620.8	561.742	19.0083	1980-07-25	2955.25	38	2	0	0	0	0	20	20	40	21
1	1980-07-25	180	150	218	70	60	3411.23	3	1	0	15104.9	10301.6	0	0	1980-07-25	3411.23	0	0	3	0	0	0	0	0	3	21
1	1980-07-29	250	150	218	85	76	5232.1	3	2	4	23187.7	15797	1820.87	53.3787	1980-07-25	3411.23	0	0	3	0	0	0	0	0	3	21
1	1980-08-01	250	200	218	89	79	5696.95	6	2	7	24902.7	17199.9	2285.72	67.0059	1980-07-25	3411.23	3	0	3	0	0	0	0	0	6	21
1	1980-08-04	260	210	218	89	79	5696.95	7	2	10	24902.7	17199.9	2285.72	67.0059	1980-07-25	3411.23	4	0	3	0	0	0	0	0	7	21
1	1980-08-07	240	190	218	89	79	5696.95	56	2	13	24902.7	17199.9	2285.72	67.0059	1980-07-25	3411.23	7	0	3	46	0	0	0	0	56	21
1	1980-08-11	220	190	218	89	79	5696.95	66	2	17	24902.7	17199.9	2285.72	67.0059	1980-07-25	3411.23	17	0	3	46	0	0	0	0	66	21
1	1980-08-14	220	190	218	89	79	5696.95	66	3	20	24902.7	17199.9	2285.72	67.0059	1980-07-25	3411.23	17	0	3	46	0	0	0	0	66	21
1	1980-07-25	180	150	219	56	50	2267.96	1	1	0	10030	6851.21	0	0	1980-07-25	2267.96	1	0	0	0	0	0	0	0	1	21
1	1980-07-29	250	150	219	71	66	3788.48	2	2	4	16779.5	11440.1	1520.52	67.0434	1980-07-25	2267.96	2	0	0	0	0	0	0	0	2	21
1	1980-08-01	250	200	219	73	66	3899.9	4	2	7	17040.6	11776.4	1631.94	71.9562	1980-07-25	2267.96	4	0	0	0	0	0	0	0	4	21
1	1980-08-04	260	210	219	73	69	4070.06	5	2	10	17785.1	12289.9	1802.1	79.4589	1980-07-25	2267.96	5	0	0	0	0	0	0	0	5	21
1	1980-08-07	240	190	219	75	69	4185.52	15	2	13	18290.2	12638.4	1917.55	84.5497	1980-07-25	2267.96	15	0	0	0	0	0	0	0	15	21
1	1980-08-11	220	190	219	77	69	4302.59	21	2	17	18802.4	12991.7	2034.63	89.7116	1980-07-25	2267.96	15	0	0	0	0	0	5	1	15	21
1	1980-08-14	220	190	219	77	69	4302.59	72	2	20	18802.4	12991.7	2034.63	89.7116	1980-07-25	2267.96	15	0	0	50	1	0	2	4	65	21
1	1980-08-18	220	190	219	77	69	4302.59	94	2	24	18802.4	12991.7	2034.63	89.7116	1980-07-25	2267.96	23	0	0	50	1	0	0	20	73	21
1	1980-08-21	220	190	219	77	69	4302.59	84	2	27	18802.4	12991.7	2034.63	89.7116	1980-07-25	2267.96	23	0	0	50	1	0	0	10	73	21
1	1980-08-26	200	150	219	77	69	4302.59	84	3	32	18802.4	12991.7	2034.63	89.7116	1980-07-25	2267.96	23	0	0	50	1	0	0	10	73	21
1	1980-07-25	180	150	220	61	55	2716.06	3	1	0	12019.1	8203.59	0	0	1980-07-25	2716.06	0	0	3	0	0	0	0	0	3	21
1	1980-07-29	250	150	220	66	60	3204.54	3	2	4	14187.4	9677.79	488.472	17.9845	1980-07-25	2716.06	0	0	3	0	0	0	0	0	3	21
1	1980-08-01	250	200	220	67	61	3307.07	6	2	7	14447	9987.26	591.01	21.7598	1980-07-25	2716.06	2	0	3	0	1	0	0	0	5	21
1	1980-08-04	260	210	220	68	64	3517	36	2	10	15365.4	10620.8	800.932	29.4887	1980-07-25	2716.06	2	20	3	0	1	0	10	0	25	21
1	1980-08-07	240	190	220	68	64	3517	74	2	13	15365.4	10620.8	800.932	29.4887	1980-07-25	2716.06	2	20	3	0	1	0	3	45	25	21
1	1980-08-11	220	190	220	68	64	3517	74	3	17	15365.4	10620.8	800.932	29.4887	1980-07-25	2716.06	2	20	3	0	1	0	3	45	25	21
1	1980-07-25	180	150	221	63	54	2763.09	1	1	0	12227.8	8345.53	0	0	1980-07-25	2763.09	0	0	1	0	0	0	0	0	1	21
1	1980-07-29	250	150	221	71	62	3570.49	3	2	4	15811.9	10782.2	807.391	29.2205	1980-07-25	2763.09	2	0	1	0	0	0	0	0	3	21
1	1980-08-01	250	200	221	79	69	4421.27	3	2	7	19321.6	13349.9	1658.18	60.0117	1980-07-25	2763.09	2	0	1	0	0	0	0	0	3	21
1	1980-08-04	260	210	221	79	70	4481.22	4	2	10	19583.9	13530.8	1718.13	62.1813	1980-07-25	2763.09	3	0	1	0	0	0	0	0	4	21
1	1980-08-07	240	190	221	79	70	4481.22	4	2	13	19583.9	13530.8	1718.13	62.1813	1980-07-25	2763.09	3	0	1	0	0	0	0	0	4	21
1	1980-08-11	220	190	221	79	70	4481.22	4	3	17	19583.9	13530.8	1718.13	62.1813	1980-07-25	2763.09	3	0	1	0	0	0	0	0	4	21
1	1980-07-25	180	150	222	60	57	2763.09	0	1	0	12227.8	8345.53	0	0	1980-07-25	2763.09	0	0	0	0	0	0	0	0	0	21
1	1980-07-29	250	150	222	65	66	3463.91	1	2	4	15338.8	10460.6	700.816	25.3634	1980-07-25	2763.09	1	0	0	0	0	0	0	0	1	21
1	1980-08-01	250	200	222	66	66	3517	3	2	7	15365.4	10620.8	753.902	27.2847	1980-07-25	2763.09	3	0	0	0	0	0	0	0	3	21
1	1980-08-04	260	210	222	67	67	3624.38	12	2	10	15835.2	10944.9	861.285	31.171	1980-07-25	2763.09	12	0	0	0	0	0	0	0	12	21
1	1980-08-07	240	190	222	70	67	3788.48	25	2	13	16553.2	11440.1	1025.39	37.1101	1980-07-25	2763.09	25	0	0	0	0	0	0	0	25	21
1	1980-08-11	220	190	222	70	67	3788.48	25	3	17	16553.2	11440.1	1025.39	37.1101	1980-07-25	2763.09	25	0	0	0	0	0	0	0	25	21
1	1980-07-25	180	150	223	48	46	1783.53	0	1	0	7879.55	5389.19	0	0	1980-07-25	1783.53	0	0	0	0	0	0	0	0	0	21
1	1980-07-29	250	150	223	48	46	1783.53	0	2	4	7879.55	5389.19	0	0	1980-07-25	1783.53	0	0	0	0	0	0	0	0	0	21
1	1980-08-01	250	200	223	57	55	2531.98	0	2	7	11056	7648.02	748.452	41.9647	1980-07-25	1783.53	0	0	0	0	0	0	0	0	0	21
1	1980-08-04	260	210	223	57	55	2531.98	6	2	10	11056	7648.02	748.452	41.9647	1980-07-25	1783.53	3	0	0	0	0	0	3	0	3	21
1	1980-08-07	240	190	223	57	55	2531.98	6	3	13	11056	7648.02	748.452	41.9647	1980-07-25	1783.53	3	0	0	0	0	0	3	0	3	21
1	1980-07-25	180	150	224	40	43	1390.53	0	1	0	6135.03	4203.12	0	0	1980-07-25	1390.53	0	0	0	0	0	0	0	0	0	21
1	1980-07-29	250	150	224	40	43	1390.53	0	3	4	6135.03	4203.12	0	0	1980-07-25	1390.53	0	0	0	0	0	0	0	0	0	21
1	1980-07-25	180	150	225	60	56	2716.06	0	1	0	12019.1	8203.59	0	0	1980-07-25	2716.06	0	0	0	0	0	0	0	0	0	21
1	1980-07-29	250	150	225	65	64	3358.95	2	2	4	14872.8	10143.8	642.885	23.6697	1980-07-25	2716.06	2	0	0	0	0	0	0	0	2	21
1	1980-08-01	250	200	225	66	64	3411.23	3	2	7	14902.7	10301.6	695.164	25.5945	1980-07-25	2716.06	3	0	0	0	0	0	0	0	3	21
1	1980-08-04	260	210	225	66	64	3411.23	9	2	10	14902.7	10301.6	695.164	25.5945	1980-07-25	2716.06	5	0	0	0	0	0	4	0	5	21
1	1980-08-07	240	190	225	66	64	3411.23	40	2	13	14902.7	10301.6	695.164	25.5945	1980-07-25	2716.06	5	0	0	0	0	0	30	5	5	21
1	1980-08-11	220	190	225	66	64	3411.23	40	3	17	14902.7	10301.6	695.164	25.5945	1980-07-25	2716.06	5	0	0	0	0	0	30	5	5	21
1	1980-07-25	180	150	226	66	62	3307.07	1	1	0	14642.6	9987.26	0	0	1980-07-25	3307.07	1	0	0	0	0	0	0	0	1	21
1	1980-07-29	250	150	226	67	65	3517	5	2	4	15574.4	10620.8	209.922	6.34766	1980-07-25	3307.07	5	0	0	0	0	0	0	0	5	21
1	1980-08-01	250	200	226	68	65	3570.49	8	2	7	15599.4	10782.2	263.411	7.96509	1980-07-25	3307.07	8	0	0	0	0	0	0	0	8	21
1	1980-08-04	260	210	226	68	65	3570.49	8	3	10	15599.4	10782.2	263.411	7.96509	1980-07-25	3307.07	8	0	0	0	0	0	0	0	8	21
1	1980-07-25	180	150	227	88	82	5833.4	5	1	0	25856.9	17611.7	0	0	1980-07-25	5833.4	5	0	0	0	0	0	0	0	5	22
1	1980-07-29	250	150	227	88	82	5833.4	11	2	4	25856.9	17611.7	0	0	1980-07-25	5833.4	10	0	0	0	0	0	0	1	10	22
1	1980-08-01	250	200	227	88	82	5833.4	11	3	7	25499.7	17611.7	0	0	1980-07-25	5833.4	10	0	0	0	0	0	0	1	10	22
1	1980-07-25	180	150	228	67	65	3517	0	1	0	15574.4	10620.8	0	0	1980-07-25	3517	0	0	0	0	0	0	0	0	0	22
1	1980-07-29	250	150	228	78	79	4975.35	1	2	4	22048	15022.1	1458.35	41.4658	1980-07-25	3517	1	0	0	0	0	0	0	0	1	22
1	1980-08-01	250	200	228	78	81	5102.91	2	2	7	22303.8	15407.1	1585.92	45.093	1980-07-25	3517	2	0	0	0	0	0	0	0	2	22
1	1980-08-04	260	210	228	79	84	5362.89	5	2	10	23441.2	16191.7	1845.9	52.4851	1980-07-25	3517	5	0	0	0	0	0	0	0	5	22
1	1980-08-07	240	190	228	80	86	5562.12	25	2	13	24312.8	16793	2045.12	58.1497	1980-07-25	3517	10	0	0	0	0	0	15	0	10	22
1	1980-08-11	220	190	228	80	86	5562.12	70	2	17	24312.8	16793	2045.12	58.1497	1980-07-25	3517	10	0	0	0	0	0	20	40	10	22
1	1980-08-14	220	190	228	80	86	5562.12	60	2	20	24312.8	16793	2045.12	58.1497	1980-07-25	3517	10	0	0	0	0	0	0	50	10	22
1	1980-08-18	220	190	228	80	86	5562.12	60	3	24	24312.8	16793	2045.12	58.1497	1980-07-25	3517	10	0	0	0	0	0	0	50	10	22
1	1980-07-25	180	150	229	55	51	2267.96	0	1	0	10030	6851.21	0	0	1980-07-25	2267.96	0	0	0	0	0	0	0	0	0	22
1	1980-07-29	250	150	229	83	80	5362.89	3	2	4	23768.4	16191.7	3094.93	136.463	1980-07-25	2267.96	0	0	2	0	1	0	0	0	2	22
1	1980-08-01	250	200	229	84	81	5495.31	7	2	7	24020.5	16591.3	3227.34	142.302	1980-07-25	2267.96	3	0	3	0	1	0	0	0	6	22
1	1980-08-04	260	210	229	85	82	5629.33	8	2	10	24606.9	16995.8	3361.37	148.211	1980-07-25	2267.96	4	0	3	0	1	0	0	0	7	22
1	1980-08-07	240	190	229	87	83	5833.4	9	2	13	25499.7	17611.7	3565.44	157.209	1980-07-25	2267.96	5	0	3	0	1	0	0	0	8	22
1	1980-08-11	220	190	229	87	83	5833.4	41	2	17	25499.7	17611.7	3565.44	157.209	1980-07-25	2267.96	5	0	3	32	1	0	0	0	40	22
1	1980-08-14	220	190	229	87	83	5833.4	41	3	20	25499.7	17611.7	3565.44	157.209	1980-07-25	2267.96	5	0	3	32	1	0	0	0	40	22
1	1980-07-25	180	150	230	62	68	3411.23	0	1	0	15104.9	10301.6	0	0	1980-07-25	3411.23	0	0	0	0	0	0	0	0	0	22
1	1980-07-29	250	150	230	65	72	3788.48	5	2	4	16779.5	11440.1	377.254	11.0592	1980-07-25	3411.23	3	0	0	0	0	0	2	0	3	22
1	1980-08-01	250	200	230	65	72	3788.48	7	2	7	16553.2	11440.1	377.254	11.0592	1980-07-25	3411.23	5	0	0	0	0	0	2	0	5	22
1	1980-08-04	260	210	230	65	72	3788.48	7	3	10	16553.2	11440.1	377.254	11.0592	1980-07-25	3411.23	5	0	0	0	0	0	2	0	5	22
1	1980-07-25	180	150	231	70	68	3843.99	3	1	0	17025.9	11607.7	0	0	1980-07-25	3843.99	3	0	0	0	0	0	0	0	3	22
1	1980-07-29	250	150	231	76	75	4602.33	18	2	4	20392.2	13896.3	758.342	19.728	1980-07-25	3843.99	3	15	0	0	0	0	0	0	18	22
1	1980-08-01	250	200	231	76	76	4663.49	18	2	7	20381.3	14080.9	819.502	21.3191	1980-07-25	3843.99	3	15	0	0	0	0	0	0	18	22
1	1980-08-04	260	210	231	78	77	4849.39	25	2	10	21194.6	14642	1005.4	26.1552	1980-07-25	3843.99	3	15	0	0	1	0	1	5	18	22
1	1980-08-07	240	190	231	78	77	4849.39	25	3	13	21194.6	14642	1005.4	26.1552	1980-07-25	3843.99	3	15	0	0	1	0	1	5	18	22
1	1980-07-29	250	150	232	93	94	7058.42	2	1	0	31294.8	21308.8	0	0	1980-07-29	7058.42	1	0	0	0	1	0	0	0	1	22
1	1980-08-01	250	200	232	98	99	7833.51	6	2	3	34250.2	23648	775.096	10.9812	1980-07-29	7058.42	3	0	2	0	1	0	0	0	5	22
1	1980-08-04	260	210	232	101	100	8154.85	14	2	6	35656	24617.9	1096.44	15.5338	1980-07-29	7058.42	4	6	2	0	1	0	1	0	12	22
1	1980-08-07	240	190	232	101	100	8154.85	25	2	9	35656	24617.9	1096.44	15.5338	1980-07-29	7058.42	10	10	2	0	1	0	0	2	22	22
1	1980-08-11	220	190	232	101	100	8154.85	33	2	13	35656	24617.9	1096.44	15.5338	1980-07-29	7058.42	18	10	2	0	1	0	0	2	30	22
1	1980-08-14	220	190	232	101	100	8154.85	33	2	16	35656	24617.9	1096.44	15.5338	1980-07-29	7058.42	20	10	2	0	1	0	0	0	32	22
1	1980-08-18	220	190	232	101	100	8154.85	74	2	20	35656	24617.9	1096.44	15.5338	1980-07-29	7058.42	26	10	2	0	1	0	25	10	38	22
1	1980-08-21	220	190	232	101	100	8154.85	83	2	23	35656	24617.9	1096.44	15.5338	1980-07-29	7058.42	30	10	2	0	1	0	20	20	42	22
1	1980-08-26	200	150	232	101	100	8154.85	75	2	28	35656	24617.9	1096.44	15.5338	1980-07-29	7058.42	30	20	2	0	1	0	0	22	52	22
1	1980-08-29	200	160	232	101	100	8154.85	75	3	31	35656	24617.9	1096.44	15.5338	1980-07-29	7058.42	30	20	2	0	1	0	0	22	52	22
1	1980-07-29	250	150	233	42	40	1357.22	1	1	0	5987.19	4102.61	0	0	1980-07-29	1357.22	1	0	0	0	0	0	0	0	1	22
1	1980-08-01	250	200	233	53	46	1978.31	4	2	3	8633.66	5977.05	621.086	45.7615	1980-07-29	1357.22	3	0	1	0	0	0	0	0	4	22
1	1980-08-04	260	210	233	53	49	2100.02	6	2	6	9166.16	6344.38	742.8	54.7293	1980-07-29	1357.22	3	0	2	0	1	0	0	0	5	22
1	1980-08-07	240	190	233	53	50	2141.4	6	2	9	9347.19	6469.26	784.179	57.7781	1980-07-29	1357.22	3	0	2	0	1	0	0	0	5	22
1	1980-08-11	220	190	233	53	50	2141.4	16	2	13	9347.19	6469.26	784.179	57.7781	1980-07-29	1357.22	5	0	2	8	1	0	0	0	15	22
1	1980-08-14	220	190	233	53	50	2141.4	100	2	16	9347.19	6469.26	784.179	57.7781	1980-07-29	1357.22	5	0	2	8	1	0	0	84	15	22
1	1980-08-18	220	190	233	53	50	2141.4	100	3	20	9347.19	6469.26	784.179	57.7781	1980-07-29	1357.22	5	0	2	8	1	0	0	84	15	22
1	1980-07-29	250	150	234	55	55	2442.36	0	1	0	10804.1	7377.54	0	0	1980-07-29	2442.36	0	0	0	0	0	0	0	0	0	22
1	1980-08-01	250	200	234	57	58	2669.44	11	2	3	11657.3	8062.87	227.079	9.29752	1980-07-29	2442.36	1	0	10	0	0	0	0	0	11	22
1	1980-08-04	260	210	234	57	58	2669.44	21	2	6	11657.3	8062.87	227.079	9.29752	1980-07-29	2442.36	3	7	10	0	0	0	1	0	20	22
1	1980-08-07	240	190	234	57	58	2669.44	21	3	9	11657.3	8062.87	227.079	9.29752	1980-07-29	2442.36	3	7	10	0	0	0	1	0	20	22
1	1980-07-29	250	150	235	62	57	2858.37	1	1	0	12650.8	8633.06	0	0	1980-07-29	2858.37	1	0	0	0	0	0	0	0	1	22
1	1980-08-01	250	200	235	71	65	3733.38	6	2	3	16312.1	11273.8	875.01	30.6122	1980-07-29	2858.37	1	0	5	0	0	0	0	0	6	22
1	1980-08-04	260	210	235	71	65	3733.38	8	2	6	16312.1	11273.8	875.01	30.6122	1980-07-29	2858.37	1	0	7	0	0	0	0	0	8	22
1	1980-08-07	240	190	235	72	65	3788.48	9	2	9	16553.2	11440.1	930.115	32.5401	1980-07-29	2858.37	2	0	7	0	0	0	0	0	9	22
1	1980-08-11	220	190	235	73	68	4012.94	15	2	13	17535.1	12117.5	1154.57	40.3926	1980-07-29	2858.37	8	0	7	0	0	0	0	0	15	22
1	1980-08-14	220	190	235	73	68	4012.94	15	3	16	17535.1	12117.5	1154.57	40.3926	1980-07-29	2858.37	8	0	7	0	0	0	0	0	15	22
1	1980-07-29	250	150	236	62	57	2858.37	0	1	0	12650.8	8633.06	0	0	1980-07-29	2858.37	0	0	0	0	0	0	0	0	0	22
1	1980-08-01	250	200	236	67	64	3463.91	18	2	3	15133.2	10460.6	605.543	21.1849	1980-07-29	2858.37	3	15	0	0	0	0	0	0	18	22
1	1980-08-04	260	210	236	68	68	3733.38	30	2	6	16312.1	11273.8	875.01	30.6122	1980-07-29	2858.37	15	15	0	0	0	0	0	0	30	22
1	1980-08-07	240	190	236	68	68	3733.38	30	2	9	16312.1	11273.8	875.01	30.6122	1980-07-29	2858.37	15	15	0	0	0	0	0	0	30	22
1	1980-08-11	220	190	236	68	68	3733.38	50	2	13	16312.1	11273.8	875.01	30.6122	1980-07-29	2858.37	35	15	0	0	0	0	0	0	50	22
1	1980-08-14	220	190	236	68	68	3733.38	62	2	16	16312.1	11273.8	875.01	30.6122	1980-07-29	2858.37	45	15	0	0	0	0	1	1	60	22
1	1980-08-18	220	190	236	68	68	3733.38	63	2	20	16312.1	11273.8	875.01	30.6122	1980-07-29	2858.37	45	15	0	0	0	0	2	1	60	22
1	1980-08-21	220	190	236	68	68	3733.38	96	2	23	16312.1	11273.8	875.01	30.6122	1980-07-29	2858.37	65	15	0	0	0	0	8	8	80	23
1	1980-08-26	200	150	236	68	68	3733.38	96	3	28	16312.1	11273.8	875.01	30.6122	1980-07-29	2858.37	65	15	0	0	0	0	8	8	80	23
1	1980-07-29	250	150	237	81	79	5167.3	2	1	0	22900.1	15601.4	0	0	1980-07-29	5167.3	1	0	1	0	0	0	0	0	2	23
1	1980-08-01	250	200	237	81	79	5167.3	2	3	3	22585.5	15601.4	0	0	1980-07-29	5167.3	1	0	1	0	0	0	0	0	2	23
1	1980-07-29	250	150	238	78	75	4725.06	0	1	0	20937	14266.7	0	0	1980-07-29	4725.06	0	0	0	0	0	0	0	0	0	23
1	1980-08-01	250	200	238	82	80	5297.29	1	2	3	23154.2	15993.7	572.239	12.1107	1980-07-29	4725.06	1	0	0	0	0	0	0	0	1	23
1	1980-08-04	260	210	238	85	82	5629.33	1	2	6	24606.9	16995.8	904.278	19.1379	1980-07-29	4725.06	1	0	0	0	0	0	0	0	1	23
1	1980-08-07	240	190	238	85	83	5696.95	2	2	9	24902.7	17199.9	971.897	20.569	1980-07-29	4725.06	2	0	0	0	0	0	0	0	2	23
1	1980-08-11	220	190	238	85	83	5696.95	9	2	13	24902.7	17199.9	971.897	20.569	1980-07-29	4725.06	4	0	0	0	0	0	5	0	4	23
1	1980-08-14	220	190	238	85	83	5696.95	28	2	16	24902.7	17199.9	971.897	20.569	1980-07-29	4725.06	10	0	0	10	1	0	2	5	20	23
1	1980-08-18	220	190	238	85	84	5764.98	61	2	20	25200.3	17405.2	1039.92	22.0086	1980-07-29	4725.06	10	0	0	10	1	0	25	15	20	23
1	1980-08-21	220	190	238	85	84	5764.98	41	2	23	25200.3	17405.2	1039.92	22.0086	1980-07-29	4725.06	10	0	0	10	1	0	0	20	20	23
1	1980-08-26	200	150	238	85	84	5764.98	41	3	28	25200.3	17405.2	1039.92	22.0086	1980-07-29	4725.06	10	0	0	10	1	0	0	20	20	23
1	1980-07-29	250	150	239	85	81	5562.12	0	1	0	24652.7	16793	0	0	1980-07-29	5562.12	0	0	0	0	0	0	0	0	0	23
1	1980-08-01	250	200	239	93	92	6908.24	15	2	3	30202.1	20855.6	1346.12	24.2016	1980-07-29	5562.12	2	3	10	0	0	0	0	0	15	23
1	1980-08-04	260	210	239	98	95	7518.63	25	2	6	32872.6	22697.7	1956.51	35.1756	1980-07-29	5562.12	12	3	10	0	0	0	0	0	25	23
1	1980-08-07	240	190	239	98	95	7518.63	18	2	9	32872.6	22697.7	1956.51	35.1756	1980-07-29	5562.12	2	3	10	0	0	0	0	3	15	23
1	1980-08-11	220	190	239	98	95	7518.63	18	2	13	32872.6	22697.7	1956.51	35.1756	1980-07-29	5562.12	2	3	10	0	0	0	0	3	15	23
1	1980-08-14	220	190	239	98	95	7518.63	16	2	16	32872.6	22697.7	1956.51	35.1756	1980-07-29	5562.12	2	3	10	0	0	0	0	1	15	23
1	1980-08-18	220	190	239	98	95	7518.63	70	2	20	32872.6	22697.7	1956.51	35.1756	1980-07-29	5562.12	2	3	10	50	0	0	0	5	65	23
1	1980-08-21	220	190	239	98	95	7518.63	65	2	23	32872.6	22697.7	1956.51	35.1756	1980-07-29	5562.12	2	3	10	50	0	0	0	0	65	23
1	1980-08-26	200	150	239	98	95	7518.63	65	3	28	32872.6	22697.7	1956.51	35.1756	1980-07-29	5562.12	2	3	10	50	0	0	0	0	65	23
1	1980-07-29	250	150	240	85	80	5495.31	0	1	0	24356.1	16591.3	0	0	1980-07-29	5495.31	0	0	0	0	0	0	0	0	0	23
1	1980-08-01	250	200	240	89	84	6041.1	1	2	3	26408.4	18238.6	545.796	9.93205	1980-07-29	5495.31	1	0	0	0	0	0	0	0	1	23
1	1980-08-04	260	210	240	92	87	6467.41	5	2	6	28273.4	19525.1	972.099	17.6896	1980-07-29	5495.31	5	0	0	0	0	0	0	0	5	23
1	1980-08-07	240	190	240	94	89	6759.68	8	2	9	29552.2	20407.2	1264.37	23.0083	1980-07-29	5495.31	8	0	0	0	0	0	0	0	8	23
1	1980-08-11	220	190	240	96	89	6908.24	8	2	13	30202.1	20855.6	1412.93	25.7117	1980-07-29	5495.31	8	0	0	0	0	0	0	0	8	23
1	1980-08-14	220	190	240	96	90	6983.13	10	2	16	30529.7	21081.6	1487.82	27.0744	1980-07-29	5495.31	10	0	0	0	0	0	0	0	10	23
1	1980-08-18	220	190	240	96	90	6983.13	14	2	20	30529.7	21081.6	1487.82	27.0744	1980-07-29	5495.31	10	0	0	0	0	0	2	2	10	23
1	1980-08-21	220	190	240	96	90	6983.13	36	2	23	30529.7	21081.6	1487.82	27.0744	1980-07-29	5495.31	28	0	0	0	1	0	5	2	28	23
1	1980-08-26	200	150	240	96	90	6983.13	36	3	28	30529.7	21081.6	1487.82	27.0744	1980-07-29	5495.31	28	0	0	0	1	0	5	2	28	23
1	1980-07-29	250	150	241	65	59	3103.61	1	1	0	13739.4	9373.21	0	0	1980-07-29	3103.61	1	0	0	0	0	0	0	0	1	23
1	1980-08-01	250	200	241	70	63	3570.49	2	2	3	15599.4	10782.2	466.874	15.0429	1980-07-29	3103.61	2	0	0	0	0	0	0	0	2	23
1	1980-08-04	260	210	241	70	63	3570.49	3	2	6	15599.4	10782.2	466.874	15.0429	1980-07-29	3103.61	3	0	0	0	0	0	0	0	3	23
1	1980-08-07	240	190	241	76	66	4070.06	10	2	9	17785.1	12289.9	966.447	31.1394	1980-07-29	3103.61	10	0	0	0	0	0	0	0	10	23
1	1980-08-11	220	190	241	76	69	4243.85	25	2	13	18545.4	12814.4	1140.24	36.7391	1980-07-29	3103.61	25	0	0	0	0	0	0	0	25	23
1	1980-08-14	220	190	241	76	69	4243.85	30	2	16	18545.4	12814.4	1140.24	36.7391	1980-07-29	3103.61	30	0	0	0	0	0	0	0	30	23
1	1980-08-18	220	190	241	76	69	4243.85	30	3	20	18545.4	12814.4	1140.24	36.7391	1980-07-29	3103.61	30	0	0	0	0	0	0	0	30	23
1	1980-07-29	250	150	242	58	63	2955.25	4	1	0	13080.8	8925.46	0	0	1980-07-29	2955.25	0	2	2	0	0	0	0	0	4	23
1	1980-08-01	250	200	242	65	69	3624.38	5	2	3	15835.2	10944.9	669.125	22.6419	1980-07-29	2955.25	0	2	3	0	0	0	0	0	5	23
1	1980-08-04	260	210	242	65	70	3678.68	7	2	6	16072.8	11108.8	723.423	24.4792	1980-07-29	2955.25	1	3	3	0	0	0	0	0	7	23
1	1980-08-07	240	190	242	66	72	3843.99	7	2	9	16796	11607.7	888.736	30.0731	1980-07-29	2955.25	1	3	3	0	0	0	0	0	7	23
1	1980-08-11	220	190	242	69	72	4012.94	8	2	13	17535.1	12117.5	1057.68	35.7899	1980-07-29	2955.25	2	3	3	0	0	0	0	0	8	23
1	1980-08-14	220	190	242	69	72	4012.94	16	2	16	17535.1	12117.5	1057.68	35.7899	1980-07-29	2955.25	10	3	3	0	0	0	0	0	16	23
1	1980-08-18	220	190	242	69	72	4012.94	80	2	20	17535.1	12117.5	1057.68	35.7899	1980-07-29	2955.25	34	3	3	0	0	0	20	20	40	23
1	1980-08-21	220	190	242	69	72	4012.94	80	3	23	17535.1	12117.5	1057.68	35.7899	1980-07-29	2955.25	34	3	3	0	0	0	20	20	40	23
1	1980-07-29	250	150	243	72	67	3899.9	2	1	0	17274.1	11776.4	0	0	1980-07-29	3899.9	0	0	2	0	0	0	0	0	2	23
1	1980-08-01	250	200	243	76	70	4302.59	6	2	3	18802.4	12991.7	402.686	10.3256	1980-07-29	3899.9	4	0	2	0	0	0	0	0	6	23
1	1980-08-04	260	210	243	79	73	4663.49	10	2	6	20381.3	14080.9	763.59	19.5797	1980-07-29	3899.9	8	0	2	0	0	0	0	0	10	23
1	1980-08-07	240	190	243	79	74	4725.06	12	2	9	20650.7	14266.7	825.154	21.1583	1980-07-29	3899.9	10	0	2	0	0	0	0	0	12	23
1	1980-08-11	220	190	243	79	74	4725.06	32	2	13	20650.7	14266.7	825.154	21.1583	1980-07-29	3899.9	30	0	2	0	0	0	0	0	32	23
1	1980-08-14	220	190	243	79	74	4725.06	32	2	16	20650.7	14266.7	825.154	21.1583	1980-07-29	3899.9	30	0	2	0	0	0	0	0	32	23
1	1980-08-18	220	190	243	79	74	4725.06	32	2	20	20650.7	14266.7	825.154	21.1583	1980-07-29	3899.9	30	0	2	0	0	0	0	0	32	23
1	1980-08-21	220	190	243	79	74	4725.06	67	2	23	20650.7	14266.7	825.154	21.1583	1980-07-29	3899.9	30	0	2	0	0	0	20	15	32	23
1	1980-08-26	200	150	243	79	74	4725.06	55	2	28	20650.7	14266.7	825.154	21.1583	1980-07-29	3899.9	30	0	2	0	0	0	0	23	32	23
1	1980-08-29	200	160	243	79	74	4725.06	55	3	31	20650.7	14266.7	825.154	21.1583	1980-07-29	3899.9	30	0	2	0	0	0	0	23	32	23
1	1980-07-29	250	150	245	51	50	2059.05	0	1	0	9102.59	6220.72	0	0	1980-07-29	2059.05	0	0	0	0	0	0	0	0	0	23
1	1980-08-01	250	200	245	56	54	2442.36	5	2	3	10663.9	7377.54	383.309	18.6158	1980-07-29	2059.05	5	0	0	0	0	0	0	0	5	23
1	1980-08-04	260	210	245	56	57	2577.39	10	2	6	11254.7	7785.08	518.345	25.174	1980-07-29	2059.05	10	0	0	0	0	0	0	0	10	23
1	1980-08-07	240	190	245	56	57	2577.39	10	2	9	11254.7	7785.08	518.345	25.174	1980-07-29	2059.05	10	0	0	0	0	0	0	0	10	23
1	1980-08-11	220	190	245	57	57	2623.21	10	2	13	11455.1	7923.37	564.165	27.3993	1980-07-29	2059.05	10	0	0	0	0	0	0	0	10	23
1	1980-08-14	220	190	245	57	57	2623.21	25	2	16	11455.1	7923.37	564.165	27.3993	1980-07-29	2059.05	10	0	0	0	0	0	10	5	10	24
1	1980-08-18	220	190	245	57	57	2623.21	62	2	20	11455.1	7923.37	564.165	27.3993	1980-07-29	2059.05	50	0	0	0	0	0	0	12	50	24
1	1980-08-21	220	190	245	57	57	2623.21	62	3	23	11455.1	7923.37	564.165	27.3993	1980-07-29	2059.05	50	0	0	0	0	0	0	12	50	24
1	1980-07-29	250	150	246	85	74	5102.91	0	1	0	22614.3	15407.1	0	0	1980-07-29	5102.91	0	0	0	0	0	0	0	0	0	24
1	1980-08-01	250	200	246	92	86	6395.35	5	2	3	27958.2	19307.7	1292.43	25.3273	1980-07-29	5102.91	2	0	3	0	0	0	0	0	5	24
1	1980-08-04	260	210	246	96	90	6983.13	5	2	6	30529.7	21081.6	1880.21	36.8459	1980-07-29	5102.91	2	0	3	0	0	0	0	0	5	24
1	1980-08-07	240	190	246	98	91	7210.21	7	2	9	31523.2	21766.9	2107.29	41.2958	1980-07-29	5102.91	3	0	3	0	1	0	0	0	6	24
1	1980-08-11	220	190	246	98	93	7363.61	7	2	13	32194.3	22229.9	2260.7	44.302	1980-07-29	5102.91	3	0	3	0	1	0	0	0	6	24
1	1980-08-14	220	190	246	98	93	7363.61	63	2	16	32194.3	22229.9	2260.7	44.302	1980-07-29	5102.91	3	0	3	56	1	0	0	0	62	24
1	1980-08-18	220	190	246	98	93	7363.61	63	2	20	32194.3	22229.9	2260.7	44.302	1980-07-29	5102.91	3	0	3	56	1	0	0	0	62	24
1	1980-08-21	220	190	246	98	93	7363.61	63	3	23	32194.3	22229.9	2260.7	44.302	1980-07-29	5102.91	3	0	3	56	1	0	0	0	62	24
1	1980-07-29	250	150	247	63	53	2716.06	0	1	0	12019.1	8203.59	0	0	1980-07-29	2716.06	0	0	0	0	0	0	0	0	0	24
1	1980-08-01	250	200	247	81	70	4602.33	3	2	3	20113.8	13896.3	1886.27	69.4486	1980-07-29	2716.06	1	2	0	0	0	0	0	0	3	24
1	1980-08-04	260	210	247	88	77	5495.31	3	2	6	24020.5	16591.3	2779.24	102.326	1980-07-29	2716.06	1	2	0	0	0	0	0	0	3	24
1	1980-08-07	240	190	247	89	79	5696.95	5	2	9	24902.7	17199.9	2980.89	109.75	1980-07-29	2716.06	3	2	0	0	0	0	0	0	5	24
1	1980-08-11	220	190	247	93	81	6111.14	12	2	13	26714.8	18449.9	3395.08	125	1980-07-29	2716.06	10	2	0	0	0	0	0	0	12	24
1	1980-08-14	220	190	247	93	81	6111.14	50	2	16	26714.8	18449.9	3395.08	125	1980-07-29	2716.06	48	2	0	0	0	0	0	0	50	24
1	1980-08-18	220	190	247	93	81	6111.14	50	3	20	26714.8	18449.9	3395.08	125	1980-07-29	2716.06	48	2	0	0	0	0	0	0	50	24
1	1980-07-29	250	150	248	49	50	1978.31	0	1	0	8744.19	5977.05	0	0	1980-07-29	1978.31	0	0	0	0	0	0	0	0	0	24
1	1980-08-01	250	200	248	50	52	2100.02	2	2	3	9166.16	6344.38	121.714	6.15243	1980-07-29	1978.31	2	0	0	0	0	0	0	0	2	24
1	1980-08-04	260	210	248	51	52	2141.4	3	2	6	9347.19	6469.26	163.093	8.24406	1980-07-29	1978.31	3	0	0	0	0	0	0	0	3	24
1	1980-08-07	240	190	248	51	52	2141.4	3	3	9	9347.19	6469.26	163.093	8.24406	1980-07-29	1978.31	3	0	0	0	0	0	0	0	3	24
1	1980-08-01	250	200	249	59	52	2486.97	0	1	0	10859	7512.17	0	0	1980-08-01	2486.97	0	0	0	0	0	0	0	0	0	24
1	1980-08-04	260	210	249	65	59	3103.61	1	2	3	13556.9	9373.21	616.645	24.7951	1980-08-01	2486.97	1	0	0	0	0	0	0	0	1	24
1	1980-08-07	240	190	249	71	60	3463.91	1	2	6	15133.2	10460.6	976.943	39.2825	1980-08-01	2486.97	1	0	0	0	0	0	0	0	1	24
1	1980-08-11	220	190	249	71	61	3517	5	2	10	15365.4	10620.8	1030.03	41.4171	1980-08-01	2486.97	5	0	0	0	0	0	0	0	5	24
1	1980-08-14	220	190	249	71	61	3517	15	2	13	15365.4	10620.8	1030.03	41.4171	1980-08-01	2486.97	13	2	0	0	0	0	0	0	15	24
1	1980-08-18	220	190	249	71	61	3517	62	2	17	15365.4	10620.8	1030.03	41.4171	1980-08-01	2486.97	25	2	0	0	0	0	25	10	27	24
1	1980-08-21	220	190	249	71	61	3517	97	2	20	15365.4	10620.8	1030.03	41.4171	1980-08-01	2486.97	25	2	0	0	0	0	30	40	27	24
1	1980-08-26	200	150	249	71	61	3517	97	3	25	15365.4	10620.8	1030.03	41.4171	1980-08-01	2486.97	25	2	0	0	0	0	30	40	27	24
1	1980-08-01	250	200	250	60	56	2716.06	0	1	0	11861.3	8203.59	0	0	1980-08-01	2716.06	0	0	0	0	0	0	0	0	0	24
1	1980-08-04	260	210	250	74	72	4302.59	2	2	3	18802.4	12991.7	1586.52	58.4126	1980-08-01	2716.06	2	0	0	0	0	0	0	0	2	24
1	1980-08-07	240	190	250	80	75	4849.39	3	2	6	21194.6	14642	2133.33	78.5449	1980-08-01	2716.06	3	0	0	0	0	0	0	0	3	24
1	1980-08-11	220	190	250	82	79	5232.1	4	2	10	22869	15797	2516.03	92.6353	1980-08-01	2716.06	4	0	0	0	0	0	0	0	4	24
1	1980-08-14	220	190	250	82	70	4663.49	5	2	13	20381.3	14080.9	1947.43	71.7004	1980-08-01	2716.06	5	0	0	0	0	0	0	0	5	24
1	1980-08-18	220	190	250	83	80	5362.89	7	2	17	23441.2	16191.7	2646.83	97.451	1980-08-01	2716.06	5	0	0	0	0	0	0	2	5	24
1	1980-08-21	220	190	250	83	80	5362.89	35	2	20	23441.2	16191.7	2646.83	97.451	1980-08-01	2716.06	5	0	0	0	0	0	25	5	5	24
1	1980-08-26	200	150	250	83	80	5362.89	29	2	25	23441.2	16191.7	2646.83	97.451	1980-08-01	2716.06	5	0	0	0	0	0	5	19	5	24
1	1980-08-29	200	160	250	83	80	5362.89	29	3	28	23441.2	16191.7	2646.83	97.451	1980-08-01	2716.06	5	0	0	0	0	0	5	19	5	24
1	1980-08-01	250	200	251	70	59	3358.95	3	1	0	14674	10143.8	0	0	1980-08-01	3358.95	0	0	3	0	0	0	0	0	3	24
1	1980-08-04	260	210	251	80	72	4663.49	7	2	3	20381.3	14080.9	1304.54	38.8378	1980-08-01	3358.95	2	2	3	0	0	0	0	0	7	24
1	1980-08-07	240	190	251	83	74	4975.35	7	2	6	21745.7	15022.1	1616.4	48.1221	1980-08-01	3358.95	2	2	3	0	0	0	0	0	7	24
1	1980-08-11	220	190	251	86	76	5297.29	8	2	10	23154.2	15993.7	1938.34	57.7069	1980-08-01	3358.95	2	3	3	0	0	0	0	0	8	24
1	1980-08-14	220	190	251	86	76	5297.29	21	2	13	23154.2	15993.7	1938.34	57.7069	1980-08-01	3358.95	15	3	3	0	0	0	0	0	21	24
1	1980-08-18	220	190	251	86	76	5297.29	31	2	17	23154.2	15993.7	1938.34	57.7069	1980-08-01	3358.95	25	3	3	0	0	0	0	0	31	24
1	1980-08-21	220	190	251	86	76	5297.29	31	2	20	23154.2	15993.7	1938.34	57.7069	1980-08-01	3358.95	25	3	3	0	0	0	0	0	31	24
1	1980-08-26	200	150	251	86	78	5428.9	56	2	25	23730	16390.9	2069.95	61.6249	1980-08-01	3358.95	25	3	3	0	0	0	10	15	31	24
1	1980-08-29	200	160	251	86	78	5428.9	81	2	28	23730	16390.9	2069.95	61.6249	1980-08-01	3358.95	25	3	3	0	0	0	20	30	31	24
1	1980-09-02	200	160	251	86	78	5428.9	81	3	32	21150.3	16390.9	2069.95	61.6249	1980-08-01	3358.95	25	3	3	0	0	0	20	30	31	24
1	1980-08-01	250	200	252	85	82	5629.33	14	1	0	24606.9	16995.8	0	0	1980-08-01	5629.33	1	0	12	0	1	0	0	0	13	24
1	1980-08-04	260	210	252	88	87	6181.59	14	2	3	27023	18662.5	552.256	9.81032	1980-08-01	5629.33	1	0	12	0	1	0	0	0	13	24
1	1980-08-07	240	190	252	90	88	6395.35	65	2	6	27958.2	19307.7	766.012	13.6075	1980-08-01	5629.33	2	0	12	50	1	0	0	0	64	24
1	1980-08-11	220	190	252	93	88	6612.74	65	2	10	28909.3	19963.7	983.402	17.4693	1980-08-01	5629.33	2	0	12	50	1	0	0	0	64	24
1	1980-08-14	220	190	252	93	89	6686.01	71	2	13	29229.8	20184.9	1056.67	18.7708	1980-08-01	5629.33	3	0	12	50	1	0	5	0	65	24
1	1980-08-18	220	190	252	95	90	6908.24	88	2	17	30202.1	20855.6	1278.91	22.7186	1980-08-01	5629.33	12	0	12	50	1	0	10	3	74	24
1	1980-08-21	220	190	252	95	90	6908.24	100	2	20	30202.1	20855.6	1278.91	22.7186	1980-08-01	5629.33	12	0	12	50	1	0	5	20	74	24
1	1980-08-26	200	150	252	93	90	6759.68	100	3	25	29552.2	20407.2	1130.35	20.0796	1980-08-01	5629.33	12	0	12	50	1	0	5	20	74	24
1	1980-08-01	250	200	253	76	63	3899.9	0	1	0	17040.6	11776.4	0	0	1980-08-01	3899.9	0	0	0	0	0	0	0	0	0	24
1	1980-08-04	260	210	253	91	80	5902.23	31	2	3	25800.8	17819.4	2002.33	51.3431	1980-08-01	3899.9	30	0	0	0	1	0	0	0	30	24
1	1980-08-07	240	190	253	93	84	6323.69	51	2	6	27644.7	19091.4	2423.79	62.15	1980-08-01	3899.9	30	0	0	20	1	0	0	0	50	24
1	1980-08-11	220	190	253	93	84	6323.69	51	2	10	27644.7	19091.4	2423.79	62.15	1980-08-01	3899.9	30	0	0	20	1	0	0	0	50	24
1	1980-08-14	220	190	253	93	84	6323.69	51	2	13	27644.7	19091.4	2423.79	62.15	1980-08-01	3899.9	30	0	0	20	1	0	0	0	50	25
1	1980-08-18	220	190	253	93	84	6323.69	55	2	17	27644.7	19091.4	2423.79	62.15	1980-08-01	3899.9	30	0	0	20	1	0	4	0	50	25
1	1980-08-21	220	190	253	93	84	6323.69	60	2	20	27644.7	19091.4	2423.79	62.15	1980-08-01	3899.9	30	0	0	20	0	0	5	5	50	25
1	1980-08-26	200	150	253	93	84	6323.69	76	2	25	27644.7	19091.4	2423.79	62.15	1980-08-01	3899.9	30	0	0	20	1	0	10	15	50	25
1	1980-08-29	200	160	253	93	84	6323.69	76	3	28	27644.7	19091.4	2423.79	62.15	1980-08-01	3899.9	30	0	0	20	1	0	10	15	50	25
1	1980-08-01	250	200	254	71	60	3463.91	2	1	0	15133.2	10460.6	0	0	1980-08-01	3463.91	2	0	0	0	0	0	0	0	2	25
1	1980-08-04	260	210	254	83	71	4787.02	3	2	3	20921.8	14453.7	1323.11	38.1971	1980-08-01	3463.91	3	0	0	0	0	0	0	0	3	25
1	1980-08-07	240	190	254	85	74	5102.91	3	2	6	22303.8	15407.1	1639	47.3166	1980-08-01	3463.91	3	0	0	0	0	0	0	0	3	25
1	1980-08-11	220	190	254	86	74	5167.3	13	2	10	22585.5	15601.4	1703.39	49.1755	1980-08-01	3463.91	3	0	10	0	0	0	0	0	13	25
1	1980-08-14	220	190	254	86	74	5167.3	80	2	13	22585.5	15601.4	1703.39	49.1755	1980-08-01	3463.91	3	0	10	67	0	0	0	0	80	25
1	1980-08-18	220	190	254	86	74	5167.3	88	2	17	22585.5	15601.4	1703.39	49.1755	1980-08-01	3463.91	11	0	10	67	0	0	0	0	88	25
1	1980-08-21	220	190	254	86	74	5167.3	88	2	20	22585.5	15601.4	1703.39	49.1755	1980-08-01	3463.91	11	0	10	67	0	0	0	0	88	25
1	1980-08-26	200	150	254	86	74	5167.3	100	2	25	22585.5	15601.4	1703.39	49.1755	1980-08-01	3463.91	11	0	10	67	0	0	10	2	88	25
1	1980-08-29	200	160	254	86	74	5167.3	100	3	28	22585.5	15601.4	1703.39	49.1755	1980-08-01	3463.91	11	0	10	67	0	0	10	2	88	25
1	1980-08-01	250	200	255	60	52	2531.98	0	1	0	11056	7648.02	0	0	1980-08-01	2531.98	0	0	0	0	0	0	0	0	0	25
1	1980-08-04	260	210	255	74	65	3899.9	1	2	3	17040.6	11776.4	1367.92	54.0258	1980-08-01	2531.98	1	0	0	0	0	0	0	0	1	25
1	1980-08-07	240	190	255	74	65	3899.9	1	3	6	17040.6	11776.4	1367.92	54.0258	1980-08-01	2531.98	1	0	0	0	0	0	0	0	1	25
1	1980-08-01	250	200	256	54	51	2225.37	0	1	0	9714.55	6722.68	0	0	1980-08-01	2225.37	0	0	0	0	0	0	0	0	0	25
1	1980-08-04	260	210	256	72	69	4012.94	8	2	3	17535.1	12117.5	1787.56	80.3265	1980-08-01	2225.37	4	4	0	0	0	0	0	0	8	25
1	1980-08-07	240	190	256	76	73	4481.22	14	2	6	19583.9	13530.8	2255.85	101.37	1980-08-01	2225.37	10	4	0	0	0	0	0	0	14	25
1	1980-08-11	220	190	256	79	77	4912.17	15	2	10	21469.3	14831.4	2686.8	120.735	1980-08-01	2225.37	10	4	0	0	0	0	0	1	14	25
1	1980-08-14	220	190	256	79	80	5102.91	23	2	13	22303.8	15407.1	2877.54	129.306	1980-08-01	2225.37	13	4	5	0	0	0	0	1	22	25
1	1980-08-18	220	190	256	80	80	5167.3	25	2	17	22585.5	15601.4	2941.93	132.2	1980-08-01	2225.37	15	4	5	0	0	0	0	1	24	25
1	1980-08-21	220	190	256	82	80	5297.29	24	2	20	23154.2	15993.7	3071.92	138.041	1980-08-01	2225.37	15	4	5	0	0	0	0	0	24	25
1	1980-08-26	200	150	256	82	80	5297.29	39	2	25	23154.2	15993.7	3071.92	138.041	1980-08-01	2225.37	20	4	5	0	0	0	10	0	29	25
1	1980-08-29	200	160	256	82	80	5297.29	39	3	28	23154.2	15993.7	3071.92	138.041	1980-08-01	2225.37	20	4	5	0	0	0	10	0	29	25
1	1980-08-01	250	200	257	78	70	4421.27	0	1	0	19321.6	13349.9	0	0	1980-08-01	4421.27	0	0	0	0	0	0	0	0	0	25
1	1980-08-04	260	210	257	86	81	5629.33	1	2	3	24606.9	16995.8	1208.06	27.3238	1980-08-01	4421.27	1	0	0	0	0	0	0	0	1	25
1	1980-08-07	240	190	257	86	84	5833.4	1	2	6	25499.7	17611.7	1412.13	31.9394	1980-08-01	4421.27	1	0	0	0	0	0	0	0	1	25
1	1980-08-11	220	190	257	91	86	6323.69	2	2	10	27644.7	19091.4	1902.42	43.0287	1980-08-01	4421.27	2	0	0	0	0	0	0	0	2	25
1	1980-08-14	220	190	257	91	86	6323.69	3	2	13	27644.7	19091.4	1902.42	43.0287	1980-08-01	4421.27	2	0	0	0	1	0	0	0	2	25
1	1980-08-18	220	190	257	92	86	6395.35	4	2	17	27958.2	19307.7	1974.07	44.6494	1980-08-01	4421.27	3	0	0	0	1	0	0	0	3	25
1	1980-08-21	220	190	257	92	86	6395.35	6	2	20	27958.2	19307.7	1974.07	44.6494	1980-08-01	4421.27	5	0	0	0	1	0	0	0	5	25
1	1980-08-26	200	150	257	92	88	6539.87	21	2	25	28590.5	19743.8	2118.59	47.9182	1980-08-01	4421.27	10	0	0	0	1	0	10	0	10	25
1	1980-08-29	200	160	257	92	88	6539.87	31	2	28	28590.5	19743.8	2118.59	47.9182	1980-08-01	4421.27	18	0	0	0	1	0	10	2	18	25
1	1980-09-02	200	160	257	92	88	6539.87	100	2	32	25484.2	19743.8	2118.59	47.9182	1980-08-01	4421.27	18	0	0	0	1	0	71	10	18	25
1	1980-09-05	200	170	257	92	88	6539.87	100	3	35	25484.2	19743.8	2118.59	47.9182	1980-08-01	4421.27	18	0	0	0	1	0	71	10	18	25
1	1980-08-01	250	200	258	65	59	3103.61	10	1	0	13556.9	9373.21	0	0	1980-08-01	3103.61	10	0	0	0	0	0	0	0	10	25
1	1980-08-04	260	210	258	65	63	3307.07	10	2	3	14447	9987.26	203.463	6.55567	1980-08-01	3103.61	10	0	0	0	0	0	0	0	10	25
1	1980-08-07	240	190	258	65	66	3463.91	10	2	6	15133.2	10460.6	360.298	11.609	1980-08-01	3103.61	10	0	0	0	0	0	0	0	10	25
1	1980-08-11	220	190	258	65	66	3463.91	10	2	10	15133.2	10460.6	360.298	11.609	1980-08-01	3103.61	10	0	0	0	0	0	0	0	10	25
1	1980-08-14	220	190	258	65	67	3517	10	2	13	15365.4	10620.8	413.384	13.3195	1980-08-01	3103.61	10	0	0	0	0	0	0	0	10	25
1	1980-08-18	220	190	258	65	67	3517	10	2	17	15365.4	10620.8	413.384	13.3195	1980-08-01	3103.61	10	0	0	0	0	0	0	0	10	25
1	1980-08-21	220	190	258	65	67	3517	16	2	20	15365.4	10620.8	413.384	13.3195	1980-08-01	3103.61	16	0	0	0	0	0	0	0	16	25
1	1980-08-26	200	150	258	65	67	3517	98	2	25	15365.4	10620.8	413.384	13.3195	1980-08-01	3103.61	38	0	0	0	0	0	12	48	38	25
1	1980-08-29	200	160	258	65	67	3517	80	2	28	15365.4	10620.8	413.384	13.3195	1980-08-01	3103.61	38	0	0	0	0	0	0	42	38	25
1	1980-09-02	200	160	258	65	67	3517	80	3	32	13691.9	10620.8	413.384	13.3195	1980-08-01	3103.61	38	0	0	0	0	0	0	42	38	25
1	1980-08-01	250	200	259	48	43	1671.5	0	1	0	7291.37	5051.1	0	0	1980-08-01	1671.5	0	0	0	0	0	0	0	0	0	25
1	1980-08-04	260	210	259	58	55	2577.39	2	2	3	11254.7	7785.08	905.893	54.1964	1980-08-01	1671.5	2	0	0	0	0	0	0	0	2	25
1	1980-08-07	240	190	259	64	62	3204.54	3	2	6	13998.4	9677.79	1533.03	91.716	1980-08-01	1671.5	3	0	0	0	0	0	0	0	3	25
1	1980-08-11	220	190	259	67	66	3570.49	4	2	10	15599.4	10782.2	1898.98	113.609	1980-08-01	1671.5	4	0	0	0	0	0	0	0	4	25
1	1980-08-14	220	190	259	70	67	3788.48	5	2	13	16553.2	11440.1	2116.98	126.651	1980-08-01	1671.5	5	0	0	0	0	0	0	0	5	25
1	1980-08-18	220	190	259	72	67	3899.9	5	2	17	17040.6	11776.4	2228.4	133.317	1980-08-01	1671.5	5	0	0	0	0	0	0	0	5	25
1	1980-08-21	220	190	259	72	67	3899.9	7	2	20	17040.6	11776.4	2228.4	133.317	1980-08-01	1671.5	7	0	0	0	0	0	0	0	7	25
1	1980-08-26	200	150	259	72	67	3899.9	15	2	25	17040.6	11776.4	2228.4	133.317	1980-08-01	1671.5	15	0	0	0	0	0	0	0	15	25
1	1980-08-29	200	160	259	72	67	3899.9	110	2	28	17040.6	11776.4	2228.4	133.317	1980-08-01	1671.5	64	0	0	0	0	0	0	46	64	25
1	1980-09-02	200	160	259	72	67	3899.9	110	3	32	15185.6	11776.4	2228.4	133.317	1980-08-01	1671.5	64	0	0	0	0	0	0	46	64	25
2	1980-08-01	250	200	260	56	49	2225.37	0	1	0	9714.55	6722.68	0	0	1980-08-01	2225.37	0	0	0	0	0	0	0	0	0	51
2	1980-08-04	260	210	260	66	59	3153.87	5	2	3	13776.7	9524.89	928.5	41.7234	1980-08-01	2225.37	5	0	0	0	0	0	0	0	5	51
2	1980-08-07	240	190	260	69	61	3411.23	10	2	6	14902.7	10301.6	1185.86	53.288	1980-08-01	2225.37	10	0	0	0	0	0	0	0	10	51
2	1980-08-11	220	190	260	69	64	3570.49	25	2	10	15599.4	10782.2	1345.11	60.4444	1980-08-01	2225.37	25	0	0	0	0	0	0	0	25	51
2	1980-08-14	220	190	260	69	64	3570.49	25	2	13	15599.4	10782.2	1345.11	60.4444	1980-08-01	2225.37	25	0	0	0	0	0	0	0	25	51
2	1980-08-18	220	190	260	69	64	3570.49	25	2	17	15599.4	10782.2	1345.11	60.4444	1980-08-01	2225.37	25	0	0	0	0	0	0	0	25	51
2	1980-08-21	220	190	260	70	64	3624.38	25	2	20	15835.2	10944.9	1399.01	62.8662	1980-08-01	2225.37	25	0	0	0	0	0	0	0	25	51
2	1980-08-26	200	150	260	72	65	3788.48	25	2	25	16553.2	11440.1	1563.11	70.2404	1980-08-01	2225.37	25	0	0	0	0	0	0	0	25	51
2	1980-08-29	200	160	260	72	65	3788.48	25	3	28	16553.2	11440.1	1563.11	70.2404	1980-08-01	2225.37	25	0	0	0	0	0	0	0	25	51
1	1980-08-04	260	210	261	88	84	5971.47	3	1	0	26103.7	18028.4	0	0	1980-08-04	5971.47	3	0	0	0	0	0	0	0	3	25
1	1980-08-07	240	190	261	89	84	6041.1	8	2	3	26408.4	18238.6	69.6375	1.16617	1980-08-04	5971.47	8	0	0	0	0	0	0	0	8	25
1	1980-08-11	220	190	261	89	84	6041.1	79	2	7	26408.4	18238.6	69.6375	1.16617	1980-08-04	5971.47	8	0	0	57	0	0	14	0	65	25
1	1980-08-14	220	190	261	89	84	6041.1	79	2	10	26408.4	18238.6	69.6375	1.16617	1980-08-04	5971.47	8	0	0	57	0	0	2	12	65	25
1	1980-08-18	220	190	261	89	84	6041.1	79	3	14	26408.4	18238.6	69.6375	1.16617	1980-08-04	5971.47	8	0	0	57	0	0	2	12	65	26
1	1980-08-04	260	210	262	59	49	2354.35	0	1	0	10278.8	7111.94	0	0	1980-08-04	2354.35	0	0	0	0	0	0	0	0	0	26
1	1980-08-07	240	190	262	79	67	4302.59	1	2	3	18802.4	12991.7	1948.23	82.7503	1980-08-04	2354.35	1	0	0	0	0	0	0	0	1	26
1	1980-08-11	220	190	262	82	70	4663.49	5	2	7	20381.3	14080.9	2309.14	98.0796	1980-08-04	2354.35	5	0	0	0	0	0	0	0	5	26
1	1980-08-14	220	190	262	84	71	4849.39	5	2	10	21194.6	14642	2495.04	105.976	1980-08-04	2354.35	5	0	0	0	0	0	0	0	5	26
1	1980-08-18	220	190	262	85	72	4975.35	6	2	14	21745.7	15022.1	2620.99	111.325	1980-08-04	2354.35	6	0	0	0	0	0	0	0	6	26
1	1980-08-21	220	190	262	85	72	4975.35	20	2	17	21745.7	15022.1	2620.99	111.325	1980-08-04	2354.35	20	0	0	0	0	0	0	0	20	26
1	1980-08-26	200	150	262	85	73	5038.93	55	2	22	22023.9	15214	2684.58	114.026	1980-08-04	2354.35	30	0	0	0	0	0	25	0	30	26
1	1980-08-29	200	160	262	85	73	5038.93	55	3	25	22023.9	15214	2684.58	114.026	1980-08-04	2354.35	30	0	0	0	0	0	25	0	30	26
1	1980-08-04	260	210	263	100	79	6467.41	3	1	0	28273.4	19525.1	0	0	1980-08-04	6467.41	3	0	0	0	0	0	0	0	3	26
1	1980-08-07	240	190	263	108	86	7596.74	5	2	3	33214.3	22933.5	1129.34	17.462	1980-08-04	6467.41	5	0	0	0	0	0	0	0	5	26
1	1980-08-11	220	190	263	113	91	8400.1	10	2	7	36729	25358	1932.69	29.8836	1980-08-04	6467.41	10	0	0	0	0	0	0	0	10	26
1	1980-08-14	220	190	263	115	91	8565.61	10	2	10	37453.1	25857.5	2098.21	32.4428	1980-08-04	6467.41	10	0	0	0	0	0	0	0	10	26
1	1980-08-18	220	190	263	115	94	8816.91	10	2	14	38552.5	26616	2349.51	36.3285	1980-08-04	6467.41	10	0	0	0	0	0	0	0	10	26
1	1980-08-21	220	190	263	115	94	8816.91	12	2	17	38552.5	26616	2349.51	36.3285	1980-08-04	6467.41	10	0	0	0	0	0	0	2	10	26
1	1980-08-26	200	150	263	115	94	8816.91	10	2	22	38552.5	26616	2349.51	36.3285	1980-08-04	6467.41	10	0	0	0	0	0	0	0	10	26
1	1980-08-29	200	160	263	115	94	8816.91	20	2	25	38552.5	26616	2349.51	36.3285	1980-08-04	6467.41	10	0	0	0	0	0	0	10	10	26
1	1980-09-02	200	160	263	115	96	8986.47	22	2	29	35028.3	27127.7	2519.06	38.9501	1980-08-04	6467.41	10	0	0	0	0	0	5	7	10	26
1	1980-09-05	200	170	263	115	98	9157.63	60	2	32	35696.1	27644.2	2690.23	41.5967	1980-08-04	6467.41	10	0	0	0	0	0	30	20	10	26
1	1980-09-08	200	170	263	115	98	9157.63	85	2	35	35696.1	27644.2	2690.23	41.5967	1980-08-04	6467.41	10	0	0	0	0	0	0	75	10	26
1	1980-09-11	190	160	263	115	98	9157.63	85	2	38	35696.1	27644.2	2690.23	41.5967	1980-08-04	6467.41	10	0	0	0	0	0	0	75	10	26
1	1980-09-16	170	140	263	115	98	9157.63	85	3	43	35696.1	27644.2	2690.23	41.5967	1980-08-04	6467.41	10	0	0	0	0	0	0	75	10	26
1	1980-08-04	260	210	264	69	60	3358.95	1	1	0	14674	10143.8	0	0	1980-08-04	3358.95	0	0	1	0	0	0	0	0	1	26
1	1980-08-07	240	190	264	78	68	4302.59	1	2	3	18802.4	12991.7	943.638	28.0933	1980-08-04	3358.95	0	0	1	0	0	0	0	0	1	26
1	1980-08-11	220	190	264	63	71	3624.38	2	2	7	15835.2	10944.9	265.43	7.90217	1980-08-04	3358.95	1	0	1	0	0	0	0	0	2	26
1	1980-08-14	220	190	264	85	73	5038.93	2	2	10	22023.9	15214	1679.98	50.015	1980-08-04	3358.95	1	0	1	0	0	0	0	0	2	26
1	1980-08-18	220	190	264	85	73	5038.93	2	2	14	22023.9	15214	1679.98	50.015	1980-08-04	3358.95	1	0	1	0	0	0	0	0	2	26
1	1980-08-21	220	190	264	85	73	5038.93	2	2	17	22023.9	15214	1679.98	50.015	1980-08-04	3358.95	1	0	1	0	0	0	0	0	2	26
1	1980-08-26	200	150	264	85	74	5102.91	4	2	22	22303.8	15407.1	1743.96	51.92	1980-08-04	3358.95	3	0	1	0	0	0	0	0	4	26
1	1980-08-29	200	160	264	85	74	5102.91	16	2	25	22303.8	15407.1	1743.96	51.92	1980-08-04	3358.95	15	0	1	0	0	0	0	0	16	26
1	1980-09-02	200	160	264	85	74	5102.91	26	2	29	19878.6	15407.1	1743.96	51.92	1980-08-04	3358.95	15	0	1	0	0	0	10	0	16	26
1	1980-09-05	200	170	264	85	74	5102.91	100	2	32	19878.6	15407.1	1743.96	51.92	1980-08-04	3358.95	15	0	1	0	0	0	74	10	16	26
1	1980-09-08	200	170	264	85	74	5102.91	96	2	35	19878.6	15407.1	1743.96	51.92	1980-08-04	3358.95	15	0	1	0	0	0	0	80	16	26
1	1980-09-11	190	160	264	85	74	5102.91	96	3	38	19878.6	15407.1	1743.96	51.92	1980-08-04	3358.95	15	0	1	0	0	0	0	80	16	26
1	1980-08-04	260	210	265	66	60	3204.54	4	1	0	13998.4	9677.79	0	0	1980-08-04	3204.54	4	0	0	0	0	0	0	0	4	26
1	1980-08-07	240	190	265	66	62	3307.07	40	2	3	14447	9987.26	102.539	3.1998	1980-08-04	3204.54	40	0	0	0	0	0	0	0	40	26
1	1980-08-11	220	190	265	66	66	3517	50	2	7	15365.4	10620.8	312.46	9.75057	1980-08-04	3204.54	50	0	0	0	0	0	0	0	50	26
1	1980-08-14	220	190	265	66	66	3517	50	2	10	15365.4	10620.8	312.46	9.75057	1980-08-04	3204.54	50	0	0	0	0	0	0	0	50	26
1	1980-08-18	220	190	265	66	66	3517	50	2	14	15365.4	10620.8	312.46	9.75057	1980-08-04	3204.54	50	0	0	0	0	0	0	0	50	26
1	1980-08-21	220	190	265	66	66	3517	60	2	17	15365.4	10620.8	312.46	9.75057	1980-08-04	3204.54	50	0	0	0	0	0	10	0	50	26
1	1980-08-26	200	150	265	66	66	3517	60	3	22	15365.4	10620.8	312.46	9.75057	1980-08-04	3204.54	50	0	0	0	0	0	10	0	50	26
1	1980-08-04	260	210	266	47	39	1492.87	6	1	0	6509.84	4511.98	0	0	1980-08-04	1492.87	6	0	0	0	0	0	0	0	6	26
1	1980-08-07	240	190	266	47	40	1527.79	6	2	3	6662.61	4617.36	34.9197	2.3391	1980-08-04	1492.87	6	0	0	0	0	0	0	0	6	26
1	1980-08-11	220	190	266	47	40	1527.79	6	3	7	6662.61	4617.36	34.9197	2.3391	1980-08-04	1492.87	6	0	0	0	0	0	0	0	6	26
1	1980-08-04	260	210	267	59	55	2623.21	4	1	0	11455.1	7923.37	0	0	1980-08-04	2623.21	4	0	0	0	0	0	0	0	4	26
1	1980-08-07	240	190	267	59	56	2669.44	10	2	3	11657.3	8062.87	46.2231	1.76208	1980-08-04	2623.21	10	0	0	0	0	0	0	0	10	26
1	1980-08-11	220	190	267	59	57	2716.06	25	2	7	11861.3	8203.59	92.85	3.53955	1980-08-04	2623.21	25	0	0	0	0	0	0	0	25	26
1	1980-08-14	220	190	267	59	57	2716.06	25	2	10	11861.3	8203.59	92.85	3.53955	1980-08-04	2623.21	25	0	0	0	0	0	0	0	25	26
1	1980-08-18	220	190	267	59	57	2716.06	100	2	14	11861.3	8203.59	92.85	3.53955	1980-08-04	2623.21	25	0	0	0	0	0	45	30	25	26
1	1980-08-21	220	190	267	59	57	2716.06	100	3	17	11861.3	8203.59	92.85	3.53955	1980-08-04	2623.21	25	0	0	0	0	0	45	30	25	26
2	1980-08-04	260	210	268	38	33	1017.51	0	1	0	4430.18	3077.37	0	0	1980-08-04	1017.51	0	0	0	0	0	0	0	0	0	51
2	1980-08-07	240	190	268	47	42	1598.84	0	2	3	6973.46	4831.79	581.322	57.1315	1980-08-04	1017.51	0	0	0	0	0	0	0	0	0	51
2	1980-08-11	220	190	268	51	46	1899.19	1	2	7	8287.49	5738.25	881.671	86.6495	1980-08-04	1017.51	0	0	0	0	1	0	0	0	0	51
2	1980-08-14	220	190	268	54	48	2100.02	1	2	10	9166.16	6344.38	1082.51	106.388	1980-08-04	1017.51	0	0	0	0	1	0	0	0	0	51
2	1980-08-18	220	190	268	54	49	2141.4	2	2	14	9347.19	6469.26	1123.89	110.454	1980-08-04	1017.51	1	0	0	0	1	0	0	0	1	51
2	1980-08-21	220	190	268	54	49	2141.4	2	2	17	9347.19	6469.26	1123.89	110.454	1980-08-04	1017.51	1	0	0	0	1	0	0	0	1	51
2	1980-08-26	200	150	268	54	49	2141.4	4	2	22	9347.19	6469.26	1123.89	110.454	1980-08-04	1017.51	3	0	0	0	1	0	0	0	3	51
2	1980-08-29	200	160	268	54	49	2141.4	4	3	25	9347.19	6469.26	1123.89	110.454	1980-08-04	1017.51	3	0	0	0	1	0	0	0	3	51
1	1980-08-04	260	210	269	88	75	5362.89	0	1	0	23441.2	16191.7	0	0	1980-08-04	5362.89	0	0	0	0	0	0	0	0	0	26
1	1980-08-07	240	190	269	97	80	6323.69	0	2	3	27644.7	19091.4	960.796	17.9156	1980-08-04	5362.89	0	0	0	0	0	0	0	0	0	26
1	1980-08-11	220	190	269	100	84	6833.76	1	2	7	29876.2	20630.8	1470.86	27.4267	1980-08-04	5362.89	1	0	0	0	0	0	0	0	1	26
1	1980-08-14	220	190	269	101	84	6908.24	2	2	10	30202.1	20855.6	1545.35	28.8155	1980-08-04	5362.89	2	0	0	0	0	0	0	0	2	26
1	1980-08-18	220	190	269	101	86	7058.42	3	2	14	30859.1	21308.8	1695.52	31.6158	1980-08-04	5362.89	3	0	0	0	0	0	0	0	3	26
1	1980-08-21	220	190	269	101	86	7058.42	3	2	17	30859.1	21308.8	1695.52	31.6158	1980-08-04	5362.89	3	0	0	0	0	0	0	0	3	26
1	1980-08-26	200	150	269	101	86	7058.42	5	2	22	30859.1	21308.8	1695.52	31.6158	1980-08-04	5362.89	4	0	0	0	0	0	0	1	4	26
1	1980-08-29	200	160	269	101	86	7058.42	21	2	25	30859.1	21308.8	1695.52	31.6158	1980-08-04	5362.89	4	0	0	0	1	0	15	1	4	26
1	1980-09-02	200	160	269	102	86	7134.11	26	2	29	27802.3	21537.2	1771.21	33.0272	1980-08-04	5362.89	4	0	0	0	1	0	15	6	4	26
1	1980-09-05	200	170	269	102	86	7134.11	55	2	32	27802.3	21537.2	1771.21	33.0272	1980-08-04	5362.89	4	0	0	0	1	0	20	30	4	26
1	1980-09-08	200	170	269	102	86	7134.11	96	2	35	27802.3	21537.2	1771.21	33.0272	1980-08-04	5362.89	4	0	0	0	1	0	0	91	4	26
1	1980-09-11	190	160	269	102	86	7134.11	96	3	38	27802.3	21537.2	1771.21	33.0272	1980-08-04	5362.89	4	0	0	0	1	0	0	91	4	27
1	1980-08-04	260	210	270	79	65	4185.52	6	1	0	18290.2	12638.4	0	0	1980-08-04	4185.52	1	5	0	0	0	0	0	0	6	27
1	1980-08-07	240	190	270	79	65	4185.52	9	2	3	18290.2	12638.4	0	0	1980-08-04	4185.52	2	7	0	0	0	0	0	0	9	27
1	1980-08-11	220	190	270	79	65	4185.52	72	2	7	18290.2	12638.4	0	0	1980-08-04	4185.52	5	7	0	0	0	0	60	0	12	27
1	1980-08-14	220	190	270	79	65	4185.52	72	3	10	18290.2	12638.4	0	0	1980-08-04	4185.52	5	7	0	0	0	0	60	0	12	27
1	1980-08-04	260	210	271	87	69	4912.17	0	1	0	21469.3	14831.4	0	0	1980-08-04	4912.17	0	0	0	0	0	0	0	0	0	27
1	1980-08-07	240	190	271	110	93	8317.95	0	2	3	36369.6	25110.1	3405.78	69.3335	1980-08-04	4912.17	0	0	0	0	0	0	0	0	0	27
1	1980-08-11	220	190	271	125	105	10677.7	2	2	7	46693.7	32232	5765.58	117.373	1980-08-04	4912.17	1	0	0	0	1	0	0	0	1	27
1	1980-08-14	220	190	271	126	107	10958.1	2	2	10	47920.3	33078.1	6045.95	123.081	1980-08-04	4912.17	1	0	0	0	1	0	0	0	1	27
1	1980-08-18	220	190	271	127	108	11147	3	2	14	48746.9	33648.3	6234.88	126.927	1980-08-04	4912.17	2	0	0	0	1	0	0	0	2	27
1	1980-08-21	220	190	271	128	108	11242.1	4	2	17	49162.8	33935.2	6329.95	128.863	1980-08-04	4912.17	3	0	0	0	1	0	0	0	3	27
1	1980-08-26	200	150	271	128	109	11337.6	54	2	22	49580.5	34223.3	6425.42	130.806	1980-08-04	4912.17	3	0	0	0	1	0	50	0	3	27
1	1980-08-29	200	160	271	129	109	11433.5	75	2	25	50000	34512.7	6521.3	132.758	1980-08-04	4912.17	4	0	0	0	1	0	30	40	4	27
1	1980-09-02	200	160	271	129	109	11433.5	100	2	29	44574.1	34512.7	6521.3	132.758	1980-08-04	4912.17	5	0	0	0	1	0	14	80	5	27
1	1980-09-05	200	170	271	129	109	11433.5	100	3	32	44574.1	34512.7	6521.3	132.758	1980-08-04	4912.17	5	0	0	0	1	0	14	80	5	27
1	1980-08-04	260	210	272	50	49	1978.31	3	1	0	8633.66	5977.05	0	0	1980-08-04	1978.31	3	0	0	0	0	0	0	0	3	27
1	1980-08-07	240	190	272	50	50	2018.48	100	2	3	8809.39	6098.27	40.1677	2.03041	1980-08-04	1978.31	3	0	0	0	0	0	88	9	3	27
1	1980-08-11	220	190	272	50	50	2018.48	100	3	7	8809.39	6098.27	40.1677	2.03041	1980-08-04	1978.31	3	0	0	0	0	0	88	9	3	27
1	1980-08-04	260	210	273	95	79	6111.14	3	1	0	26714.8	18449.9	0	0	1980-08-04	6111.14	2	0	0	0	1	0	0	0	2	27
1	1980-08-07	240	190	273	97	82	6467.41	3	2	3	28273.4	19525.1	356.261	5.8297	1980-08-04	6111.14	2	0	0	0	1	0	0	0	2	27
1	1980-08-11	220	190	273	99	83	6686.01	4	2	7	29229.8	20184.9	574.863	9.40679	1980-08-04	6111.14	3	0	0	0	1	0	0	0	3	27
1	1980-08-14	220	190	273	100	83	6759.68	5	2	10	29552.2	20407.2	648.537	10.6124	1980-08-04	6111.14	4	0	0	0	1	0	0	0	4	27
1	1980-08-18	220	190	273	100	83	6759.68	31	2	14	29552.2	20407.2	648.537	10.6124	1980-08-04	6111.14	30	0	0	0	1	0	0	0	30	27
1	1980-08-21	220	190	273	100	85	6908.24	36	2	17	30202.1	20855.6	797.097	13.0433	1980-08-04	6111.14	30	0	0	0	1	0	0	5	30	27
1	1980-08-26	200	150	273	100	88	7134.11	37	2	22	31190.3	21537.2	1022.96	16.7393	1980-08-04	6111.14	0	30	0	0	1	0	1	5	30	27
1	1980-08-29	200	160	273	100	88	7134.11	51	2	25	31190.3	21537.2	1022.96	16.7393	1980-08-04	6111.14	30	0	0	0	1	0	20	0	30	27
1	1980-09-02	200	160	273	100	88	7134.11	95	2	29	27802.3	21537.2	1022.96	16.7393	1980-08-04	6111.14	30	0	0	0	1	0	24	40	30	27
1	1980-09-05	200	170	273	100	88	7134.11	95	3	32	27802.3	21537.2	1022.96	16.7393	1980-08-04	6111.14	30	0	0	0	1	0	24	40	30	27
1	1980-08-04	260	210	274	61	56	2763.09	3	1	0	12067.1	8345.53	0	0	1980-08-04	2763.09	3	0	0	0	0	0	0	0	3	27
1	1980-08-07	240	190	274	62	58	2906.61	18	2	3	12695	8778.65	143.514	5.19395	1980-08-04	2763.09	3	15	0	0	0	0	0	0	18	27
1	1980-08-11	220	190	274	62	60	3004.3	18	2	7	13122.4	9073.49	241.208	8.72964	1980-08-04	2763.09	3	15	0	0	0	0	0	0	18	27
1	1980-08-14	220	190	274	64	63	3255.6	40	2	10	14221.8	9831.92	492.509	17.8245	1980-08-04	2763.09	15	15	0	0	0	0	10	0	30	27
1	1980-08-18	220	190	274	64	63	3255.6	75	2	14	14221.8	9831.92	492.509	17.8245	1980-08-04	2763.09	35	15	0	0	0	0	0	25	50	27
1	1980-08-21	220	190	274	64	63	3255.6	75	3	17	14221.8	9831.92	492.509	17.8245	1980-08-04	2763.09	35	15	0	0	0	0	0	25	50	27
1	1980-08-04	260	210	275	105	98	8317.95	11	1	0	36369.6	25110.1	0	0	1980-08-04	8317.95	7	3	0	0	1	0	0	0	10	27
1	1980-08-07	240	190	275	105	98	8317.95	11	2	3	36369.6	25110.1	0	0	1980-08-04	8317.95	7	3	0	0	1	0	0	0	10	27
1	1980-08-11	220	190	275	105	98	8317.95	91	2	7	36369.6	25110.1	0	0	1980-08-04	8317.95	7	3	0	70	1	0	10	0	80	27
1	1980-08-14	220	190	275	105	98	8317.95	91	3	10	36369.6	25110.1	0	0	1980-08-04	8317.95	7	3	0	70	1	0	10	0	80	27
2	1980-08-07	240	190	276	51	43	1783.53	0	1	0	7781.48	5389.19	0	0	1980-08-07	1783.53	0	0	0	0	0	0	0	0	0	51
2	1980-08-11	220	190	276	63	58	2955.25	2	2	4	12907.8	8925.46	1171.73	65.6971	1980-08-07	1783.53	2	0	0	0	0	0	0	0	2	51
2	1980-08-14	220	190	276	63	58	2955.25	2	3	7	12907.8	8925.46	1171.73	65.6971	1980-08-07	1783.53	2	0	0	0	0	0	0	0	2	51
1	1980-08-07	240	190	277	93	75	5696.95	0	1	0	24902.7	17199.9	0	0	1980-08-07	5696.95	0	0	0	0	0	0	0	0	0	27
1	1980-08-11	220	190	277	115	93	8732.74	1	2	4	38184.3	26361.9	3035.79	53.288	1980-08-07	5696.95	1	0	0	0	0	0	0	0	1	27
1	1980-08-14	220	190	277	119	97	9417.41	1	2	7	41179.7	28428.3	3720.46	65.3061	1980-08-07	5696.95	1	0	0	0	0	0	0	0	1	27
1	1980-08-18	220	190	277	119	99	9592.61	1	2	11	41946.2	28957	3895.66	68.3815	1980-08-07	5696.95	1	0	0	0	0	0	0	0	1	27
1	1980-08-21	220	190	277	124	99	10037.7	1	2	14	43893.4	30300.3	4340.74	76.194	1980-08-07	5696.95	1	0	0	0	0	0	0	0	1	27
1	1980-08-26	200	150	277	124	99	10037.7	51	2	19	43893.4	30300.3	4340.74	76.194	1980-08-07	5696.95	1	0	0	0	0	0	50	0	1	27
1	1980-08-29	200	160	277	124	100	10127.9	64	2	22	44288.2	30572.6	4430.96	77.7778	1980-08-07	5696.95	2	0	0	0	0	0	50	12	2	27
1	1980-09-02	200	160	277	124	100	10127.9	100	2	26	39481.1	30572.6	4430.96	77.7778	1980-08-07	5696.95	2	0	0	0	0	0	0	98	2	27
1	1980-09-05	200	170	277	124	100	10127.9	100	3	29	39481.1	30572.6	4430.96	77.7778	1980-08-07	5696.95	2	0	0	0	0	0	0	98	2	27
1	1980-08-07	240	190	278	70	60	3411.23	0	1	0	14902.7	10301.6	0	0	1980-08-07	3411.23	0	0	0	0	0	0	0	0	0	27
1	1980-08-11	220	190	278	94	82	6252.44	1	2	4	27333	18876.4	2841.21	83.2899	1980-08-07	3411.23	1	0	0	0	0	0	0	0	1	27
1	1980-08-14	220	190	278	101	85	6983.13	3	2	7	30529.7	21081.6	3571.9	104.71	1980-08-07	3411.23	3	0	0	0	0	0	0	0	3	27
1	1980-08-18	220	190	278	101	86	7058.42	5	2	11	30859.1	21308.8	3647.19	106.917	1980-08-07	3411.23	5	0	0	0	0	0	0	0	5	27
1	1980-08-21	220	190	278	101	86	7058.42	5	2	14	30859.1	21308.8	3647.19	106.917	1980-08-07	3411.23	5	0	0	0	0	0	0	0	5	27
1	1980-08-26	200	150	278	101	87	7134.11	5	2	19	31190.3	21537.2	3722.88	109.136	1980-08-07	3411.23	5	0	0	0	0	0	0	0	5	27
1	1980-08-29	200	160	278	101	88	7210.21	5	2	22	31523.2	21766.9	3798.98	111.367	1980-08-07	3411.23	5	0	0	0	0	0	0	0	5	27
1	1980-09-02	200	160	278	103	88	7363.61	6	2	26	28697.6	22229.9	3952.38	115.864	1980-08-07	3411.23	5	0	1	0	0	0	0	0	6	27
1	1980-09-05	200	170	278	103	88	7363.61	11	2	29	28697.6	22229.9	3952.38	115.864	1980-08-07	3411.23	5	0	1	0	0	0	2	3	6	27
1	1980-09-08	200	170	278	103	89	7440.92	12	2	32	28999.2	22463.2	4029.69	118.13	1980-08-07	3411.23	5	0	1	0	0	0	1	5	6	27
1	1980-09-11	190	160	278	104	89	7518.63	13	2	35	29302.3	22697.7	4107.4	120.408	1980-08-07	3411.23	5	0	1	0	0	0	2	5	6	27
1	1980-09-16	170	140	278	104	89	7518.63	53	2	40	29302.3	22697.7	4107.4	120.408	1980-08-07	3411.23	15	0	3	0	0	0	30	5	18	27
1	1980-09-19	180	150	278	104	89	7518.63	55	2	43	29302.3	22697.7	4107.4	120.408	1980-08-07	3411.23	15	0	3	0	0	0	25	12	18	27
1	1980-09-22	210	150	278	104	89	7518.63	93	2	46	29302.3	22697.7	4107.4	120.408	1980-08-07	3411.23	15	0	3	0	0	0	10	65	18	27
1	1980-09-25	200	160	278	104	89	7518.63	93	3	49	29302.3	22697.7	4107.4	120.408	1980-08-07	3411.23	15	0	3	0	0	0	10	65	18	28
1	1980-08-07	240	190	279	86	69	4849.39	0	1	0	21194.6	14642	0	0	1980-08-07	4849.39	0	0	0	0	0	0	0	0	0	28
1	1980-08-11	220	190	279	105	84	7210.21	1	2	4	31523.2	21766.9	2360.81	48.6826	1980-08-07	4849.39	1	0	0	0	0	0	0	0	1	28
1	1980-08-14	220	190	279	109	87	7754.19	2	2	7	33903.1	23408.6	2904.79	59.9001	1980-08-07	4849.39	2	0	0	0	0	0	0	0	2	28
1	1980-08-18	220	190	279	110	88	7913.24	3	2	11	34599	23888.7	3063.85	63.18	1980-08-07	4849.39	3	0	0	0	0	0	0	0	3	28
1	1980-08-21	220	190	279	110	88	7913.24	3	2	14	34599	23888.7	3063.85	63.18	1980-08-07	4849.39	3	0	0	0	0	0	0	0	3	28
1	1980-08-26	200	150	279	110	89	7993.37	8	2	19	34949.6	24130.5	3143.98	64.8325	1980-08-07	4849.39	3	0	0	0	0	0	5	0	3	28
1	1980-08-29	200	160	279	110	89	7993.37	8	2	22	34949.6	24130.5	3143.98	64.8325	1980-08-07	4849.39	3	0	0	0	0	0	3	2	3	28
1	1980-09-02	200	160	279	110	89	7993.37	6	2	26	31154.3	24130.5	3143.98	64.8325	1980-08-07	4849.39	3	0	0	0	0	0	3	0	3	28
1	1980-09-05	200	170	279	110	89	7993.37	98	2	29	31154.3	24130.5	3143.98	64.8325	1980-08-07	4849.39	3	0	0	0	0	0	0	95	3	28
1	1980-09-08	200	170	279	110	89	7993.37	98	3	32	31154.3	24130.5	3143.98	64.8325	1980-08-07	4849.39	3	0	0	0	0	0	0	95	3	28
1	1980-08-07	240	190	280	56	48	2183.19	0	1	0	9529.99	6595.36	0	0	1980-08-07	2183.19	0	0	0	0	0	0	0	0	0	28
1	1980-08-11	220	190	280	62	53	2669.44	1	2	4	11657.3	8062.87	486.251	22.2726	1980-08-07	2183.19	1	0	0	0	0	0	0	0	1	28
1	1980-08-14	220	190	280	62	55	2763.09	2	2	7	12067.1	8345.53	579.909	26.5625	1980-08-07	2183.19	2	0	0	0	0	0	0	0	2	28
1	1980-08-18	220	190	280	65	56	2955.25	3	2	11	12907.8	8925.46	772.068	35.3643	1980-08-07	2183.19	3	0	0	0	0	0	0	0	3	28
1	1980-08-21	220	190	280	65	56	2955.25	3	2	14	12907.8	8925.46	772.068	35.3643	1980-08-07	2183.19	3	0	0	0	0	0	0	0	3	28
1	1980-08-26	200	150	280	66	57	3053.76	3	2	19	13338.7	9222.74	870.57	39.8761	1980-08-07	2183.19	3	0	0	0	0	0	0	0	3	28
1	1980-08-29	200	160	280	66	57	3053.76	5	2	22	13338.7	9222.74	870.57	39.8761	1980-08-07	2183.19	5	0	0	0	0	0	0	0	5	28
1	1980-09-02	200	160	280	66	57	3053.76	100	2	26	11884.8	9222.74	870.57	39.8761	1980-08-07	2183.19	8	0	0	0	0	0	80	12	8	28
1	1980-09-05	200	170	280	66	57	3053.76	100	3	29	11884.8	9222.74	870.57	39.8761	1980-08-07	2183.19	8	0	0	0	0	0	80	12	8	28
1	1980-08-07	240	190	281	70	58	3307.07	1	1	0	14447	9987.26	0	0	1980-08-07	3307.07	1	0	0	0	0	0	0	0	1	28
1	1980-08-11	220	190	281	77	68	4243.85	2	2	4	18545.4	12814.4	936.776	28.3264	1980-08-07	3307.07	2	0	0	0	0	0	0	0	2	28
1	1980-08-14	220	190	281	77	71	4421.27	7	2	7	19321.6	13349.9	1114.2	33.6914	1980-08-07	3307.07	7	0	0	0	0	0	0	0	7	28
1	1980-08-18	220	190	281	77	71	4421.27	50	2	11	19321.6	13349.9	1114.2	33.6914	1980-08-07	3307.07	50	0	0	0	0	0	0	0	50	28
1	1980-08-21	220	190	281	77	71	4421.27	60	2	14	19321.6	13349.9	1114.2	33.6914	1980-08-07	3307.07	60	0	0	0	0	0	0	0	60	28
1	1980-08-26	200	150	281	77	71	4421.27	100	2	19	19321.6	13349.9	1114.2	33.6914	1980-08-07	3307.07	60	0	0	0	0	0	38	2	60	28
1	1980-08-29	200	160	281	77	71	4421.27	100	3	22	19321.6	13349.9	1114.2	33.6914	1980-08-07	3307.07	60	0	0	0	0	0	38	2	60	28
1	1980-08-07	240	190	282	71	60	3463.91	0	1	0	15133.2	10460.6	0	0	1980-08-07	3463.91	0	0	0	0	0	0	0	0	0	28
1	1980-08-11	220	190	282	88	74	5297.29	5	2	4	23154.2	15993.7	1833.38	52.9282	1980-08-07	3463.91	5	0	0	0	0	0	0	0	5	28
1	1980-08-14	220	190	282	93	78	5902.23	15	2	7	25800.8	17819.4	2438.32	70.3922	1980-08-07	3463.91	15	0	0	0	0	0	0	0	15	28
1	1980-08-18	220	190	282	93	78	5902.23	15	2	11	25800.8	17819.4	2438.32	70.3922	1980-08-07	3463.91	15	0	0	0	0	0	0	0	15	28
1	1980-08-21	220	190	282	94	79	6041.1	20	2	14	26408.4	18238.6	2577.19	74.4013	1980-08-07	3463.91	20	0	0	0	0	0	0	0	20	28
1	1980-08-26	200	150	282	94	79	6041.1	77	2	19	26408.4	18238.6	2577.19	74.4013	1980-08-07	3463.91	25	0	0	0	0	0	50	2	25	28
1	1980-08-29	200	160	282	94	80	6111.14	100	2	22	26714.8	18449.9	2647.23	76.4233	1980-08-07	3463.91	25	0	0	0	0	0	0	75	25	28
1	1980-09-02	200	160	282	94	80	6111.14	100	3	26	23811.7	18449.9	2647.23	76.4233	1980-08-07	3463.91	25	0	0	0	0	0	0	75	25	28
1	1980-08-07	240	190	283	77	63	3956.22	1	1	0	17287	11946.4	0	0	1980-08-07	3956.22	1	0	0	0	0	0	0	0	1	28
1	1980-08-11	220	190	283	93	77	5833.4	3	2	4	25499.7	17611.7	1877.18	47.449	1980-08-07	3956.22	3	0	0	0	0	0	0	0	3	28
1	1980-08-14	220	190	283	95	80	6181.59	5	2	7	27023	18662.5	2225.37	56.25	1980-08-07	3956.22	5	0	0	0	0	0	0	0	5	28
1	1980-08-18	220	190	283	99	80	6467.41	5	2	11	28273.4	19525.1	2511.19	63.4745	1980-08-07	3956.22	5	0	0	0	0	0	0	0	5	28
1	1980-08-21	220	190	283	99	80	6467.41	5	2	14	28273.4	19525.1	2511.19	63.4745	1980-08-07	3956.22	5	0	0	0	0	0	0	0	5	28
1	1980-08-26	200	150	283	99	81	6539.87	88	2	19	28590.5	19743.8	2583.65	65.3061	1980-08-07	3956.22	5	0	0	0	0	0	80	3	5	28
1	1980-08-29	200	160	283	99	81	6539.87	90	2	22	28590.5	19743.8	2583.65	65.3061	1980-08-07	3956.22	7	0	0	0	0	0	80	3	7	28
1	1980-09-02	200	160	283	99	81	6539.87	90	3	26	25484.2	19743.8	2583.65	65.3061	1980-08-07	3956.22	7	0	0	0	0	0	80	3	7	28
1	1980-08-07	240	190	284	42	34	1165.87	0	1	0	5079.24	3525.11	0	0	1980-08-07	1165.87	0	0	0	0	0	0	0	0	0	28
1	1980-08-11	220	190	284	50	40	1634.97	2	2	4	7131.53	4940.84	469.094	40.2355	1980-08-07	1165.87	2	0	0	0	0	0	0	0	2	28
1	1980-08-14	220	190	284	51	42	1745.78	15	2	7	7616.34	5275.27	579.909	49.7403	1980-08-07	1165.87	15	0	0	0	0	0	0	0	15	28
1	1980-08-18	220	190	284	51	42	1745.78	25	2	11	7616.34	5275.27	579.909	49.7403	1980-08-07	1165.87	25	0	0	0	0	0	0	0	25	28
1	1980-08-21	220	190	284	51	42	1745.78	100	2	14	7616.34	5275.27	579.909	49.7403	1980-08-07	1165.87	25	0	0	0	1	0	74	0	25	28
1	1980-08-26	200	150	284	51	42	1745.78	100	3	19	7616.34	5275.27	579.909	49.7403	1980-08-07	1165.87	25	0	0	0	1	0	74	0	25	28
1	1980-08-07	240	190	285	54	45	1978.31	0	1	0	8633.66	5977.05	0	0	1980-08-07	1978.31	0	0	0	0	0	0	0	0	0	28
1	1980-08-11	220	190	285	61	52	2577.39	2	2	4	11254.7	7785.08	599.084	30.2826	1980-08-07	1978.31	2	0	0	0	0	0	0	0	2	28
1	1980-08-14	220	190	285	63	54	2763.09	3	2	7	12067.1	8345.53	784.784	39.6694	1980-08-07	1978.31	3	0	0	0	0	0	0	0	3	28
1	1980-08-18	220	190	285	65	54	2858.37	3	2	11	12483.9	8633.06	880.056	44.4853	1980-08-07	1978.31	3	0	0	0	0	0	0	0	3	28
1	1980-08-21	220	190	285	65	55	2906.61	12	2	14	12695	8778.65	928.298	46.9238	1980-08-07	1978.31	12	0	0	0	0	0	0	0	12	28
1	1980-08-26	200	150	285	65	55	2906.61	32	2	19	12695	8778.65	928.298	46.9238	1980-08-07	1978.31	12	0	0	0	0	0	5	15	12	28
1	1980-08-29	200	160	285	65	55	2906.61	32	3	22	12695	8778.65	928.298	46.9238	1980-08-07	1978.31	12	0	0	0	0	0	5	15	12	28
2	1980-08-11	220	190	286	40	43	1390.53	0	1	0	6062.12	4203.12	0	0	1980-08-11	1390.53	0	0	0	0	0	0	0	0	0	51
2	1980-08-14	220	190	286	42	44	1492.87	50	2	3	6509.84	4511.98	102.337	7.35956	1980-08-11	1390.53	50	0	0	0	0	0	0	0	50	51
2	1980-08-18	220	190	286	42	44	1492.87	50	3	7	6509.84	4511.98	102.337	7.35956	1980-08-11	1390.53	50	0	0	0	0	0	0	0	50	51
1	1980-08-11	220	190	287	74	60	3624.38	0	1	0	15835.2	10944.9	0	0	1980-08-11	3624.38	0	0	0	0	0	0	0	0	0	28
1	1980-08-14	220	190	287	95	78	6041.1	0	2	3	26408.4	18238.6	2416.72	66.6797	1980-08-11	3624.38	0	0	0	0	0	0	0	0	0	28
1	1980-08-18	220	190	287	104	86	7286.71	1	2	7	31857.9	21997.8	3662.33	101.047	1980-08-11	3624.38	1	0	0	0	0	0	0	0	1	28
1	1980-08-21	220	190	287	104	87	7363.61	2	2	10	32194.3	22229.9	3739.23	103.169	1980-08-11	3624.38	2	0	0	0	0	0	0	0	2	28
1	1980-08-26	200	150	287	106	87	7518.63	3	2	15	32872.6	22697.7	3894.25	107.446	1980-08-11	3624.38	3	0	0	0	0	0	0	0	3	28
1	1980-08-29	200	160	287	106	87	7518.63	3	2	18	32872.6	22697.7	3894.25	107.446	1980-08-11	3624.38	3	0	0	0	0	0	0	0	3	29
1	1980-09-02	200	160	287	106	90	7754.19	5	2	22	30221.2	23408.6	4129.81	113.945	1980-08-11	3624.38	5	0	0	0	0	0	0	0	5	29
1	1980-09-05	200	170	287	106	90	7754.19	5	2	25	30221.2	23408.6	4129.81	113.945	1980-08-11	3624.38	5	0	0	0	0	0	0	0	5	29
1	1980-09-08	200	170	287	106	90	7754.19	6	2	28	30221.2	23408.6	4129.81	113.945	1980-08-11	3624.38	6	0	0	0	0	0	0	0	6	29
1	1980-09-11	190	160	287	107	90	7833.51	11	2	31	30530.7	23648	4209.13	116.134	1980-08-11	3624.38	6	0	0	0	0	0	0	5	6	29
1	1980-09-16	170	140	287	107	90	7833.51	23	2	36	30530.7	23648	4209.13	116.134	1980-08-11	3624.38	6	0	0	0	0	0	5	12	6	29
1	1980-09-19	180	150	287	107	90	7833.51	34	2	39	30530.7	23648	4209.13	116.134	1980-08-11	3624.38	9	0	0	0	0	0	10	15	9	29
1	1980-09-22	210	150	287	107	90	7833.51	59	2	42	30530.7	23648	4209.13	116.134	1980-08-11	3624.38	9	0	0	0	0	0	20	30	9	29
1	1980-09-25	200	160	287	107	90	7833.51	59	3	45	30530.7	23648	4209.13	116.134	1980-08-11	3624.38	9	0	0	0	0	0	20	30	9	29
1	1980-08-11	220	190	288	84	69	4725.06	0	1	0	20650.7	14266.7	0	0	1980-08-11	4725.06	0	0	0	0	0	0	0	0	0	29
1	1980-08-14	220	190	288	91	75	5562.12	0	2	3	24312.8	16793	837.063	17.7154	1980-08-11	4725.06	0	0	0	0	0	0	0	0	0	29
1	1980-08-18	220	190	288	91	76	5629.33	2	2	7	24606.9	16995.8	904.278	19.1379	1980-08-11	4725.06	2	0	0	0	0	0	0	0	2	29
1	1980-08-21	220	190	288	92	76	5696.95	8	2	10	24902.7	17199.9	971.897	20.569	1980-08-11	4725.06	8	0	0	0	0	0	0	0	8	29
1	1980-08-26	200	150	288	92	76	5696.95	10	2	15	24902.7	17199.9	971.897	20.569	1980-08-11	4725.06	10	0	0	0	0	0	0	0	10	29
1	1980-08-29	200	160	288	92	76	5696.95	12	2	18	24902.7	17199.9	971.897	20.569	1980-08-11	4725.06	12	0	0	0	0	0	0	0	12	29
1	1980-09-02	200	160	288	94	76	5833.4	100	2	22	22728.2	17611.7	1108.35	23.4568	1980-08-11	4725.06	15	0	0	0	0	0	78	7	15	29
1	1980-09-05	200	170	288	94	76	5833.4	85	2	25	22728.2	17611.7	1108.35	23.4568	1980-08-11	4725.06	15	0	0	0	0	0	0	70	15	29
1	1980-09-08	200	170	288	94	76	5833.4	85	3	28	22728.2	17611.7	1108.35	23.4568	1980-08-11	4725.06	15	0	0	0	0	0	0	70	15	29
1	1980-08-11	220	190	289	69	56	3153.87	0	1	0	13776.7	9524.89	0	0	1980-08-11	3153.87	0	0	0	0	0	0	0	0	0	29
1	1980-08-14	220	190	289	82	67	4481.22	2	2	3	19583.9	13530.8	1327.35	42.0864	1980-08-11	3153.87	2	0	0	0	0	0	0	0	2	29
1	1980-08-18	220	190	289	87	75	5297.29	2	2	7	23154.2	15993.7	2143.42	67.9616	1980-08-11	3153.87	2	0	0	0	0	0	0	0	2	29
1	1980-08-21	220	190	289	91	76	5629.33	4	2	10	24606.9	16995.8	2475.46	78.4896	1980-08-11	3153.87	4	0	0	0	0	0	0	0	4	29
1	1980-08-26	200	150	289	91	76	5629.33	4	3	15	24606.9	16995.8	2475.46	78.4896	1980-08-11	3153.87	4	0	0	0	0	0	0	0	4	29
1	1980-08-11	220	190	290	76	63	3899.9	0	1	0	17040.6	11776.4	0	0	1980-08-11	3899.9	0	0	0	0	0	0	0	0	0	29
1	1980-08-14	220	190	290	92	75	5629.33	1	2	3	24606.9	16995.8	1729.43	44.3455	1980-08-11	3899.9	1	0	0	0	0	0	0	0	1	29
1	1980-08-18	220	190	290	95	80	6181.59	1	2	7	27023	18662.5	2281.69	58.5063	1980-08-11	3899.9	1	0	0	0	0	0	0	0	1	29
1	1980-08-21	220	190	290	98	80	6395.35	5	2	10	27958.2	19307.7	2495.44	63.9874	1980-08-11	3899.9	2	3	0	0	0	0	0	0	5	29
1	1980-08-26	200	150	290	100	83	6759.68	8	2	15	29552.2	20407.2	2859.78	73.3295	1980-08-11	3899.9	3	3	0	0	0	0	0	2	6	29
1	1980-08-29	200	160	290	100	83	6759.68	10	2	18	29552.2	20407.2	2859.78	73.3295	1980-08-11	3899.9	3	3	0	0	0	0	2	2	6	29
1	1980-09-02	200	160	290	100	83	6759.68	12	2	22	26341.6	20407.2	2859.78	73.3295	1980-08-11	3899.9	4	3	0	0	0	0	2	3	7	29
1	1980-09-05	200	170	290	100	84	6833.76	9	2	25	26630.6	20630.8	2933.86	75.229	1980-08-11	3899.9	4	3	0	0	0	0	0	2	7	29
1	1980-09-08	200	170	290	100	84	6833.76	9	2	28	26630.6	20630.8	2933.86	75.229	1980-08-11	3899.9	4	3	0	0	0	0	0	2	7	29
1	1980-09-11	190	160	290	100	84	6833.76	10	2	31	26630.6	20630.8	2933.86	75.229	1980-08-11	3899.9	4	3	0	0	0	0	1	2	7	29
1	1980-09-16	170	140	290	100	84	6833.76	36	2	36	26630.6	20630.8	2933.86	75.229	1980-08-11	3899.9	22	3	0	0	0	0	10	1	25	29
1	1980-09-19	180	150	290	100	84	6833.76	55	2	39	26630.6	20630.8	2933.86	75.229	1980-08-11	3899.9	22	3	0	0	0	0	15	15	25	29
1	1980-09-22	210	150	290	100	84	6833.76	95	2	42	26630.6	20630.8	2933.86	75.229	1980-08-11	3899.9	22	3	0	0	0	0	10	60	25	29
1	1980-09-25	200	160	290	100	84	6833.76	95	3	45	26630.6	20630.8	2933.86	75.229	1980-08-11	3899.9	22	3	0	0	0	0	10	60	25	29
1	1980-08-11	220	190	291	56	46	2100.02	0	1	0	9166.16	6344.38	0	0	1980-08-11	2100.02	0	0	0	0	0	0	0	0	0	29
1	1980-08-14	220	190	291	68	57	3153.87	1	2	3	13776.7	9524.89	1053.85	50.1826	1980-08-11	2100.02	1	0	0	0	0	0	0	0	1	29
1	1980-08-18	220	190	291	72	60	3517	3	2	7	15365.4	10620.8	1416.97	67.474	1980-08-11	2100.02	2	0	0	0	1	0	0	0	2	29
1	1980-08-21	220	190	291	75	62	3788.48	31	2	10	16553.2	11440.1	1688.46	80.4018	1980-08-11	2100.02	5	25	0	0	1	0	0	0	30	29
1	1980-08-26	200	150	291	76	66	4070.06	33	2	15	17785.1	12289.9	1970.03	93.8101	1980-08-11	2100.02	7	25	0	0	1	0	0	0	32	29
1	1980-08-29	200	160	291	78	70	4421.27	33	2	18	19321.6	13349.9	2321.25	110.534	1980-08-11	2100.02	7	25	0	0	1	0	0	0	32	29
1	1980-09-02	200	160	291	78	74	4663.49	33	2	22	18164.4	14080.9	2563.47	122.068	1980-08-11	2100.02	7	25	0	0	1	0	0	0	32	29
1	1980-09-05	200	170	291	78	74	4663.49	60	2	25	18164.4	14080.9	2563.47	122.068	1980-08-11	2100.02	7	25	0	0	1	0	25	2	32	29
1	1980-09-08	200	170	291	78	74	4663.49	100	2	28	18164.4	14080.9	2563.47	122.068	1980-08-11	2100.02	27	25	0	0	1	0	28	19	52	29
1	1980-09-11	190	160	291	78	74	4663.49	100	2	31	18164.4	14080.9	2563.47	122.068	1980-08-11	2100.02	27	25	0	0	1	0	0	47	52	29
1	1980-09-16	170	140	291	78	74	4663.49	100	3	36	18164.4	14080.9	2563.47	122.068	1980-08-11	2100.02	27	25	0	0	1	0	0	47	52	29
1	1980-08-11	220	190	292	52	43	1821.68	0	1	0	7948.38	5504.33	0	0	1980-08-11	1821.68	0	0	0	0	0	0	0	0	0	29
1	1980-08-14	220	190	292	66	55	2955.25	0	2	3	12907.8	8925.46	1133.58	62.2271	1980-08-11	1821.68	0	0	0	0	0	0	0	0	0	29
1	1980-08-18	220	190	292	73	62	3678.68	1	2	7	16072.8	11108.8	1857	101.939	1980-08-11	1821.68	1	0	0	0	0	0	0	0	1	29
1	1980-08-21	220	190	292	74	64	3843.99	1	2	10	16796	11607.7	2022.31	111.014	1980-08-11	1821.68	1	0	0	0	0	0	0	0	1	29
1	1980-08-26	200	150	292	75	64	3899.9	2	2	15	17040.6	11776.4	2078.22	114.083	1980-08-11	1821.68	2	0	0	0	0	0	0	0	2	29
1	1980-08-29	200	160	292	77	65	4070.06	3	2	18	17785.1	12289.9	2248.38	123.424	1980-08-11	1821.68	3	0	0	0	0	0	0	0	3	29
1	1980-09-02	200	160	292	77	65	4070.06	100	2	22	15849.4	12289.9	2248.38	123.424	1980-08-11	1821.68	3	0	3	0	0	0	89	5	6	29
1	1980-09-05	200	170	292	77	65	4070.06	100	3	25	15849.4	12289.9	2248.38	123.424	1980-08-11	1821.68	3	0	3	0	0	0	89	5	6	29
1	1980-08-11	220	190	293	61	51	2531.98	1	1	0	11056	7648.02	0	0	1980-08-11	2531.98	1	0	0	0	0	0	0	0	1	29
1	1980-08-14	220	190	293	62	53	2669.44	2	2	3	11657.3	8062.87	137.458	5.42889	1980-08-11	2531.98	2	0	0	0	0	0	0	0	2	29
1	1980-08-18	220	190	293	64	54	2810.53	5	2	7	12274.6	8488.68	278.55	11.0013	1980-08-11	2531.98	5	0	0	0	0	0	0	0	5	29
1	1980-08-21	220	190	293	64	58	3004.3	40	2	10	13122.4	9073.49	472.324	18.6543	1980-08-11	2531.98	40	0	0	0	0	0	0	0	40	29
1	1980-08-26	200	150	293	64	58	3004.3	85	2	15	13122.4	9073.49	472.324	18.6543	1980-08-11	2531.98	85	0	0	0	0	0	0	0	85	29
1	1980-08-29	200	160	293	64	58	3004.3	95	2	18	13122.4	9073.49	472.324	18.6543	1980-08-11	2531.98	85	0	8	0	0	0	0	2	93	30
1	1980-09-02	200	160	293	64	58	3004.3	95	3	22	11691.9	9073.49	472.324	18.6543	1980-08-11	2531.98	85	0	8	0	0	0	0	2	93	30
1	1980-08-11	220	190	294	62	53	2669.44	0	1	0	11657.3	8062.87	0	0	1980-08-11	2669.44	0	0	0	0	0	0	0	0	0	30
1	1980-08-14	220	190	294	75	64	3899.9	1	2	3	17040.6	11776.4	1230.46	46.0945	1980-08-11	2669.44	1	0	0	0	0	0	0	0	1	30
1	1980-08-18	220	190	294	81	71	4663.49	10	2	7	20381.3	14080.9	1994.05	74.6994	1980-08-11	2669.44	10	0	0	0	0	0	0	0	10	30
1	1980-08-21	220	190	294	83	73	4912.17	15	2	10	21469.3	14831.4	2242.73	84.0151	1980-08-11	2669.44	15	0	0	0	0	0	0	0	15	30
1	1980-08-26	200	150	294	84	73	4975.35	15	2	15	21745.7	15022.1	2305.91	86.3819	1980-08-11	2669.44	15	0	0	0	0	0	0	0	15	30
1	1980-08-29	200	160	294	85	74	5102.91	21	2	18	22303.8	15407.1	2433.48	91.1607	1980-08-11	2669.44	15	0	6	0	0	0	0	0	21	30
1	1980-09-02	200	160	294	85	76	5232.1	24	2	22	20382.5	15797	2562.66	96	1980-08-11	2669.44	18	0	6	0	0	0	0	0	24	30
1	1980-09-05	200	170	294	85	78	5362.89	26	2	25	20892.8	16191.7	2693.46	100.9	1980-08-11	2669.44	20	0	6	0	0	0	0	0	26	30
1	1980-09-08	200	170	294	85	78	5362.89	31	2	28	20892.8	16191.7	2693.46	100.9	1980-08-11	2669.44	20	0	6	0	0	0	5	0	26	30
1	1980-09-11	190	160	294	85	78	5362.89	100	2	31	20892.8	16191.7	2693.46	100.9	1980-08-11	2669.44	24	0	6	0	0	0	63	7	30	30
1	1980-09-16	170	140	294	85	78	5362.89	100	3	36	20892.8	16191.7	2693.46	100.9	1980-08-11	2669.44	24	0	6	0	0	0	63	7	30	30
1	1980-08-11	220	190	295	55	46	2059.05	0	1	0	8986.89	6220.72	0	0	1980-08-11	2059.05	0	0	0	0	0	0	0	0	0	30
1	1980-08-14	220	190	295	70	57	3255.6	2	2	3	14221.8	9831.92	1196.55	58.1119	1980-08-11	2059.05	2	0	0	0	0	0	0	0	2	30
1	1980-08-18	220	190	295	76	62	3843.99	8	2	7	16796	11607.7	1784.94	86.6876	1980-08-11	2059.05	8	0	0	0	0	0	0	0	8	30
1	1980-08-21	220	190	295	78	62	3956.22	20	2	10	17287	11946.4	1897.17	92.138	1980-08-11	2059.05	20	0	0	0	0	0	0	0	20	30
1	1980-08-26	200	150	295	79	65	4185.52	20	2	15	18290.2	12638.4	2126.47	103.274	1980-08-11	2059.05	20	0	0	0	0	0	0	0	20	30
1	1980-08-29	200	160	295	79	66	4243.85	20	2	18	18545.4	12814.4	2184.8	106.107	1980-08-11	2059.05	20	0	0	0	0	0	0	0	20	30
1	1980-09-02	200	160	295	79	66	4243.85	52	2	22	16527.4	12814.4	2184.8	106.107	1980-08-11	2059.05	30	0	0	0	0	0	20	2	30	30
1	1980-09-05	200	170	295	79	66	4243.85	80	2	25	16527.4	12814.4	2184.8	106.107	1980-08-11	2059.05	30	0	0	0	0	0	25	25	30	30
1	1980-09-08	200	170	295	80	66	4302.59	90	2	28	16756.5	12991.7	2243.54	108.96	1980-08-11	2059.05	30	0	0	0	0	0	10	50	30	30
1	1980-09-11	190	160	295	80	66	4302.59	90	3	31	16756.5	12991.7	2243.54	108.96	1980-08-11	2059.05	30	0	0	0	0	0	10	50	30	30
1	1980-08-11	220	190	296	89	71	5167.3	2	1	0	22585.5	15601.4	0	0	1980-08-11	5167.3	1	0	0	0	1	0	0	0	1	30
1	1980-08-14	220	190	296	94	75	5764.98	3	2	3	25200.3	17405.2	597.671	11.5664	1980-08-11	5167.3	2	0	0	0	1	0	0	0	2	30
1	1980-08-18	220	190	296	96	77	6041.1	3	2	7	26408.4	18238.6	873.799	16.9102	1980-08-11	5167.3	2	0	0	0	1	0	0	0	2	30
1	1980-08-21	220	190	296	97	77	6111.14	3	2	10	26714.8	18449.9	943.84	18.2656	1980-08-11	5167.3	2	0	0	0	1	0	0	0	2	30
1	1980-08-26	200	150	296	99	78	6323.69	4	2	15	27644.7	19091.4	1156.39	22.3789	1980-08-11	5167.3	3	0	0	0	1	0	0	0	3	30
1	1980-08-29	200	160	296	99	78	6323.69	18	2	18	27644.7	19091.4	1156.39	22.3789	1980-08-11	5167.3	5	0	0	0	1	0	10	2	5	30
1	1980-09-02	200	160	296	99	78	6323.69	100	2	22	24640.8	19091.4	1156.39	22.3789	1980-08-11	5167.3	5	0	0	0	1	0	64	30	5	30
1	1980-09-05	200	170	296	99	78	6323.69	100	3	25	24640.8	19091.4	1156.39	22.3789	1980-08-11	5167.3	5	0	0	0	1	0	64	30	5	30
1	1980-08-11	220	190	297	99	78	6323.69	4	1	0	27644.7	19091.4	0	0	1980-08-11	6323.69	3	0	0	0	1	0	0	0	3	30
1	1980-08-14	220	190	297	101	80	6612.74	4	2	3	28909.3	19963.7	289.046	4.57084	1980-08-11	6323.69	3	0	0	0	1	0	0	0	3	30
1	1980-08-18	220	190	297	103	83	6983.13	6	2	7	30529.7	21081.6	659.437	10.428	1980-08-11	6323.69	5	0	0	0	1	0	0	0	5	30
1	1980-08-21	220	190	297	103	85	7134.11	6	2	10	31190.3	21537.2	810.419	12.8156	1980-08-11	6323.69	5	0	0	0	1	0	0	0	5	30
1	1980-08-26	200	150	297	103	85	7134.11	13	2	15	31190.3	21537.2	810.419	12.8156	1980-08-11	6323.69	12	0	0	0	1	0	0	0	12	30
1	1980-08-29	200	160	297	103	88	7363.61	26	2	18	32194.3	22229.9	1039.92	16.4448	1980-08-11	6323.69	25	0	0	0	1	0	0	0	25	30
1	1980-09-02	200	160	297	103	88	7363.61	26	2	22	28697.6	22229.9	1039.92	16.4448	1980-08-11	6323.69	25	0	0	0	1	0	0	0	25	30
1	1980-09-05	200	170	297	103	88	7363.61	46	2	25	28697.6	22229.9	1039.92	16.4448	1980-08-11	6323.69	25	0	0	0	1	0	15	5	25	30
1	1980-09-08	200	170	297	103	88	7363.61	100	2	28	28697.6	22229.9	1039.92	16.4448	1980-08-11	6323.69	25	0	0	0	1	0	49	25	25	30
1	1980-09-11	190	160	297	103	88	7363.61	95	2	31	28697.6	22229.9	1039.92	16.4448	1980-08-11	6323.69	25	0	0	0	1	0	19	50	25	30
1	1980-09-16	170	140	297	103	88	7363.61	95	3	36	28697.6	22229.9	1039.92	16.4448	1980-08-11	6323.69	25	0	0	0	1	0	19	50	25	30
2	1980-08-11	220	190	298	39	38	1196.76	3	1	0	5214.36	3618.31	0	0	1980-08-11	1196.76	3	0	0	0	0	0	0	0	3	51
2	1980-08-14	220	190	298	54	47	2059.05	3	2	3	8986.89	6220.72	862.294	72.0526	1980-08-11	1196.76	3	0	0	0	0	0	0	0	3	51
2	1980-08-18	220	190	298	60	52	2531.98	12	2	7	11056	7648.02	1335.22	111.57	1980-08-11	1196.76	12	0	0	0	0	0	0	0	12	51
2	1980-08-21	220	190	298	61	52	2577.39	25	2	10	11254.7	7785.08	1380.64	115.365	1980-08-11	1196.76	25	0	0	0	0	0	0	0	25	51
2	1980-08-26	200	150	298	63	54	2763.09	30	2	15	12067.1	8345.53	1566.34	130.882	1980-08-11	1196.76	30	0	0	0	0	0	0	0	30	51
2	1980-08-29	200	160	298	63	58	2955.25	30	2	18	12907.8	8925.46	1758.5	146.939	1980-08-11	1196.76	30	0	0	0	0	0	0	0	30	51
2	1980-09-02	200	160	298	66	58	3103.61	40	2	22	12079.3	9373.21	1906.86	159.335	1980-08-11	1196.76	40	0	0	0	0	0	0	0	40	51
2	1980-09-05	200	170	298	66	58	3103.61	40	2	25	12079.3	9373.21	1906.86	159.335	1980-08-11	1196.76	40	0	0	0	0	0	0	0	40	51
2	1980-09-08	200	170	298	66	58	3103.61	40	2	28	12079.3	9373.21	1906.86	159.335	1980-08-11	1196.76	40	0	0	0	0	0	0	0	40	51
2	1980-09-11	190	160	298	66	58	3103.61	53	2	31	12079.3	9373.21	1906.86	159.335	1980-08-11	1196.76	50	0	0	0	0	0	0	3	50	51
2	1980-09-16	170	140	298	66	58	3103.61	53	3	36	12079.3	9373.21	1906.86	159.335	1980-08-11	1196.76	50	0	0	0	0	0	0	3	50	51
1	1980-08-14	220	190	299	85	70	4849.39	0	1	0	21194.6	14642	0	0	1980-08-14	4849.39	0	0	0	0	0	0	0	0	0	30
1	1980-08-18	220	190	299	95	80	6181.59	1	2	4	27023	18662.5	1332.2	27.4714	1980-08-14	4849.39	1	0	0	0	0	0	0	0	1	30
1	1980-08-21	220	190	299	108	91	7993.37	3	2	7	34949.6	24130.5	3143.98	64.8325	1980-08-14	4849.39	3	0	0	0	0	0	0	0	3	30
1	1980-08-26	200	150	299	110	92	8236.2	5	2	12	36011.9	24863.4	3386.8	69.8398	1980-08-14	4849.39	5	0	0	0	0	0	0	0	5	30
1	1980-08-29	200	160	299	111	94	8482.65	6	2	15	37090.2	25607.2	3633.26	74.922	1980-08-14	4849.39	6	0	0	0	0	0	0	0	6	30
1	1980-09-02	200	160	299	111	96	8648.98	7	2	19	33711.8	26109.1	3799.58	78.3517	1980-08-14	4849.39	6	0	0	0	0	0	1	0	6	30
1	1980-09-05	200	170	299	111	97	8732.74	7	2	22	34038.6	26361.9	3883.35	80.0791	1980-08-14	4849.39	6	0	0	0	0	0	0	1	6	30
1	1980-09-08	200	170	299	111	98	8816.91	7	2	25	34366.9	26616	3967.52	81.8148	1980-08-14	4849.39	7	0	0	0	0	0	0	0	7	30
1	1980-09-11	190	160	299	111	98	8816.91	7	2	28	34366.9	26616	3967.52	81.8148	1980-08-14	4849.39	7	0	0	0	0	0	0	0	7	30
1	1980-09-16	170	140	299	115	98	9157.63	12	2	33	35696.1	27644.2	4308.24	88.8408	1980-08-14	4849.39	7	0	0	0	0	0	3	2	7	30
1	1980-09-19	180	150	299	115	98	9157.63	24	2	36	35696.1	27644.2	4308.24	88.8408	1980-08-14	4849.39	7	0	0	0	0	0	10	7	7	30
1	1980-09-22	210	150	299	115	98	9157.63	99	2	39	35696.1	27644.2	4308.24	88.8408	1980-08-14	4849.39	7	0	0	0	0	0	15	77	7	30
1	1980-09-25	200	160	299	115	98	9157.63	99	3	42	35696.1	27644.2	4308.24	88.8408	1980-08-14	4849.39	7	0	0	0	0	0	15	77	7	30
1	1980-08-14	220	190	300	86	71	4975.35	2	1	0	21745.7	15022.1	0	0	1980-08-14	4975.35	1	0	1	0	0	0	0	0	2	30
1	1980-08-18	220	190	300	99	82	6612.74	3	2	4	28909.3	19963.7	1637.39	32.9101	1980-08-14	4975.35	1	0	1	0	1	0	0	0	2	30
1	1980-08-21	220	190	300	102	85	7058.42	3	2	7	30859.1	21308.8	2083.07	41.8678	1980-08-14	4975.35	1	0	1	0	1	0	0	0	2	30
1	1980-08-26	200	150	300	102	87	7210.21	3	2	12	31523.2	21766.9	2234.86	44.9187	1980-08-14	4975.35	1	0	1	0	1	0	0	0	2	30
1	1980-08-29	200	160	300	103	88	7363.61	3	2	15	32194.3	22229.9	2388.26	48.0019	1980-08-14	4975.35	1	0	1	0	1	0	0	0	2	30
1	1980-09-02	200	160	300	104	89	7518.63	3	2	19	29302.3	22697.7	2543.28	51.1177	1980-08-14	4975.35	1	0	1	0	1	0	0	0	2	30
1	1980-09-05	200	170	300	104	89	7518.63	28	2	22	29302.3	22697.7	2543.28	51.1177	1980-08-14	4975.35	1	0	1	0	1	0	25	0	2	31
1	1980-09-08	200	170	300	104	89	7518.63	100	2	25	29302.3	22697.7	2543.28	51.1177	1980-08-14	4975.35	2	0	1	0	1	0	61	35	3	31
1	1980-09-11	190	160	300	104	89	7518.63	100	2	28	29302.3	22697.7	2543.28	51.1177	1980-08-14	4975.35	2	0	1	0	1	0	0	96	3	31
1	1980-09-16	170	140	300	104	89	7518.63	100	3	33	29302.3	22697.7	2543.28	51.1177	1980-08-14	4975.35	2	0	1	0	1	0	0	96	3	31
1	1980-08-14	220	190	301	57	56	2577.39	1	1	0	11254.7	7785.08	0	0	1980-08-14	2577.39	1	0	0	0	0	0	0	0	1	31
1	1980-08-18	220	190	301	57	56	2577.39	10	2	4	11254.7	7785.08	0	0	1980-08-14	2577.39	10	0	0	0	0	0	0	0	10	31
1	1980-08-21	220	190	301	59	56	2669.44	50	2	7	11657.3	8062.87	92.0426	3.57115	1980-08-14	2577.39	50	0	0	0	0	0	0	0	50	31
1	1980-08-26	200	150	301	59	56	2669.44	60	2	12	11657.3	8062.87	92.0426	3.57115	1980-08-14	2577.39	60	0	0	0	0	0	0	0	60	31
1	1980-08-29	200	160	301	59	56	2669.44	60	3	15	11657.3	8062.87	92.0426	3.57115	1980-08-14	2577.39	60	0	0	0	0	0	0	0	60	31
1	1980-08-14	220	190	302	79	64	4127.59	0	1	0	18036.7	12463.6	0	0	1980-08-14	4127.59	0	0	0	0	0	0	0	0	0	31
1	1980-08-18	220	190	302	89	75	5428.9	1	2	4	23730	16390.9	1301.31	31.5272	1980-08-14	4127.59	1	0	0	0	0	0	0	0	1	31
1	1980-08-21	220	190	302	91	76	5629.33	1	2	7	24606.9	16995.8	1501.75	36.3832	1980-08-14	4127.59	1	0	0	0	0	0	0	0	1	31
1	1980-08-26	200	150	302	95	79	6111.14	2	2	12	26714.8	18449.9	1983.56	48.0561	1980-08-14	4127.59	2	0	0	0	0	0	0	0	2	31
1	1980-08-29	200	160	302	95	79	6111.14	3	2	15	26714.8	18449.9	1983.56	48.0561	1980-08-14	4127.59	3	0	0	0	0	0	0	0	3	31
1	1980-09-02	200	160	302	95	79	6111.14	3	2	19	23811.7	18449.9	1983.56	48.0561	1980-08-14	4127.59	3	0	0	0	0	0	0	0	3	31
1	1980-09-05	200	170	302	95	79	6111.14	3	2	22	23811.7	18449.9	1983.56	48.0561	1980-08-14	4127.59	3	0	0	0	0	0	0	0	3	31
1	1980-09-08	200	170	302	95	79	6111.14	3	2	25	23811.7	18449.9	1983.56	48.0561	1980-08-14	4127.59	3	0	0	0	0	0	0	0	3	31
1	1980-09-11	190	160	302	95	80	6181.59	3	2	28	24086.5	18662.5	2054	49.7628	1980-08-14	4127.59	3	0	0	0	0	0	0	0	3	31
1	1980-09-16	170	140	302	95	80	6181.59	16	2	33	24086.5	18662.5	2054	49.7628	1980-08-14	4127.59	3	0	0	0	0	0	12	1	3	31
1	1980-09-19	180	150	302	95	80	6181.59	17	2	36	24086.5	18662.5	2054	49.7628	1980-08-14	4127.59	3	0	0	0	0	0	2	12	3	31
1	1980-09-22	210	150	302	95	80	6181.59	17	3	39	24086.5	18662.5	2054	49.7628	1980-08-14	4127.59	3	0	0	0	0	0	2	12	3	31
1	1980-08-14	220	190	303	85	72	4975.35	5	1	0	21745.7	15022.1	0	0	1980-08-14	4975.35	5	0	0	0	0	0	0	0	5	31
1	1980-08-18	220	190	303	87	77	5428.9	7	2	4	23730	16390.9	453.552	9.11599	1980-08-14	4975.35	7	0	0	0	0	0	0	0	7	31
1	1980-08-21	220	190	303	89	77	5562.12	10	2	7	24312.8	16793	586.772	11.7936	1980-08-14	4975.35	10	0	0	0	0	0	0	0	10	31
1	1980-08-26	200	150	303	92	80	5971.47	15	2	12	26103.7	18028.4	996.119	20.0211	1980-08-14	4975.35	15	0	0	0	0	0	0	0	15	31
1	1980-08-29	200	160	303	92	80	5971.47	28	2	15	26103.7	18028.4	996.119	20.0211	1980-08-14	4975.35	18	0	0	0	0	0	10	0	18	31
1	1980-09-02	200	160	303	92	80	5971.47	100	2	19	23266.8	18028.4	996.119	20.0211	1980-08-14	4975.35	18	0	0	0	0	0	70	12	18	31
1	1980-09-05	200	170	303	92	80	5971.47	100	3	22	23266.8	18028.4	996.119	20.0211	1980-08-14	4975.35	18	0	0	0	0	0	70	12	18	31
1	1980-08-14	220	190	304	61	51	2531.98	1	1	0	11056	7648.02	0	0	1980-08-14	2531.98	1	0	0	0	0	0	0	0	1	31
1	1980-08-18	220	190	304	67	62	3358.95	16	2	4	14674	10143.8	826.97	32.661	1980-08-14	2531.98	1	0	15	0	0	0	0	0	16	31
1	1980-08-21	220	190	304	67	62	3358.95	16	2	7	14674	10143.8	826.97	32.661	1980-08-14	2531.98	1	0	15	0	0	0	0	0	16	31
1	1980-08-26	200	150	304	67	64	3463.91	16	2	12	15133.2	10460.6	931.931	36.8064	1980-08-14	2531.98	1	0	15	0	0	0	0	0	16	31
1	1980-08-29	200	160	304	69	64	3570.49	17	2	15	15599.4	10782.2	1038.51	41.0156	1980-08-14	2531.98	2	0	15	0	0	0	0	0	17	31
1	1980-09-02	200	160	304	69	66	3678.68	17	2	19	14322.6	11108.8	1146.7	45.2886	1980-08-14	2531.98	2	0	15	0	0	0	0	0	17	31
1	1980-09-05	200	170	304	69	67	3733.38	26	2	22	14536	11273.8	1201.4	47.449	1980-08-14	2531.98	10	0	15	0	0	0	0	1	25	31
1	1980-09-08	200	170	304	69	67	3733.38	100	2	25	14536	11273.8	1201.4	47.449	1980-08-14	2531.98	30	0	15	0	0	0	0	55	45	31
1	1980-09-11	190	160	304	69	67	3733.38	100	3	28	14536	11273.8	1201.4	47.449	1980-08-14	2531.98	30	0	15	0	0	0	0	55	45	31
2	1980-08-18	220	190	305	37	33	989.054	0	1	0	4305.66	2991.47	0	0	1980-08-18	989.054	0	0	0	0	0	0	0	0	0	51
2	1980-08-21	220	190	305	42	38	1291.83	1	2	3	5630.29	3905.24	302.772	30.6122	1980-08-18	989.054	1	0	0	0	0	0	0	0	1	51
2	1980-08-26	200	150	305	47	42	1598.84	1	2	8	6973.46	4831.79	609.782	61.6531	1980-08-18	989.054	1	0	0	0	0	0	0	0	1	51
2	1980-08-29	200	160	305	50	43	1745.78	2	2	11	7616.34	5275.27	756.727	76.5102	1980-08-18	989.054	1	0	1	0	0	0	0	0	2	51
2	1980-09-02	200	160	305	50	48	1938.55	6	2	15	7534.4	5857.04	949.492	96	1980-08-18	989.054	5	0	1	0	0	0	0	0	6	51
2	1980-09-05	200	170	305	50	48	1938.55	26	2	18	7534.4	5857.04	949.492	96	1980-08-18	989.054	25	0	1	0	0	0	0	0	26	51
2	1980-09-08	200	170	305	50	48	1938.55	76	2	21	7534.4	5857.04	949.492	96	1980-08-18	989.054	25	0	1	50	0	0	0	0	76	52
2	1980-09-11	190	160	305	50	48	1938.55	76	3	24	7534.4	5857.04	949.492	96	1980-08-18	989.054	25	0	1	50	0	0	0	0	76	52
2	1980-08-18	220	190	306	45	41	1492.87	1	1	0	6509.84	4511.98	0	0	1980-08-18	1492.87	1	0	0	0	0	0	0	0	1	52
2	1980-08-21	220	190	306	48	44	1708.44	1	2	3	7452.97	5162.58	215.573	14.4402	1980-08-18	1492.87	1	0	0	0	0	0	0	0	1	52
2	1980-08-26	200	150	306	50	47	1899.19	2	2	8	8287.49	5738.25	406.32	27.2174	1980-08-18	1492.87	2	0	0	0	0	0	0	0	2	52
2	1980-08-29	200	160	306	52	49	2059.05	4	2	11	8986.89	6220.72	566.183	37.9259	1980-08-18	1492.87	4	0	0	0	0	0	0	0	4	52
2	1980-09-02	200	160	306	52	49	2059.05	17	2	15	8004.48	6220.72	566.183	37.9259	1980-08-18	1492.87	17	0	0	0	0	0	0	0	17	52
2	1980-09-05	200	170	306	54	54	2354.35	50	2	18	9156.46	7111.94	861.486	57.7069	1980-08-18	1492.87	35	0	15	0	0	0	0	0	50	52
2	1980-09-08	200	170	306	54	54	2354.35	70	2	21	9156.46	7111.94	861.486	57.7069	1980-08-18	1492.87	45	0	15	0	0	0	10	0	60	52
2	1980-09-11	190	160	306	54	54	2354.35	100	2	24	9156.46	7111.94	861.486	57.7069	1980-08-18	1492.87	60	0	15	0	0	0	0	25	75	52
2	1980-09-16	170	140	306	54	54	2354.35	100	3	29	9156.46	7111.94	861.486	57.7069	1980-08-18	1492.87	60	0	15	0	0	0	0	25	75	52
2	1980-08-18	220	190	307	32	32	826.769	1	1	0	3595.66	2501.69	0	0	1980-08-18	826.769	1	0	0	0	0	0	0	0	1	52
2	1980-08-21	220	190	307	32	35	906.095	1	2	3	3942.71	2741.1	79.3262	9.59473	1980-08-18	826.769	1	0	0	0	0	0	0	0	1	52
2	1980-08-26	200	150	307	36	37	1075.65	3	2	8	4684.51	3252.81	248.878	30.1025	1980-08-18	826.769	3	0	0	0	0	0	0	0	3	52
2	1980-08-29	200	160	307	36	39	1135.39	5	2	11	4945.9	3433.12	308.625	37.3291	1980-08-18	826.769	5	0	0	0	0	0	0	0	5	52
2	1980-09-02	200	160	307	36	39	1135.39	80	2	15	4401.3	3433.12	308.625	37.3291	1980-08-18	826.769	80	0	0	0	0	0	0	0	80	52
2	1980-09-05	200	170	307	36	39	1135.39	80	2	18	4401.3	3433.12	308.625	37.3291	1980-08-18	826.769	80	0	0	0	0	0	0	0	80	52
2	1980-09-08	200	170	307	36	39	1135.39	90	2	21	4401.3	3433.12	308.625	37.3291	1980-08-18	826.769	90	0	0	0	0	0	0	0	90	52
2	1980-09-11	190	160	307	36	39	1135.39	95	2	24	4401.3	3433.12	308.625	37.3291	1980-08-18	826.769	95	0	0	0	0	0	0	0	95	52
2	1980-09-16	170	140	307	36	39	1135.39	95	3	29	4401.3	3433.12	308.625	37.3291	1980-08-18	826.769	95	0	0	0	0	0	0	0	95	52
1	1980-08-18	220	190	308	74	60	3624.38	0	1	0	15835.2	10944.9	0	0	1980-08-18	3624.38	0	0	0	0	0	0	0	0	0	31
1	1980-08-21	220	190	308	89	74	5362.89	1	2	3	23441.2	16191.7	1738.52	47.9673	1980-08-18	3624.38	1	0	0	0	0	0	0	0	1	31
1	1980-08-26	200	150	308	101	82	6759.68	1	2	8	29552.2	20407.2	3135.3	86.5059	1980-08-18	3624.38	1	0	0	0	0	0	0	0	1	31
1	1980-08-29	200	160	308	102	84	6983.13	2	2	11	30529.7	21081.6	3358.75	92.671	1980-08-18	3624.38	2	0	0	0	0	0	0	0	2	31
1	1980-09-02	200	160	308	103	85	7134.11	2	2	15	27802.3	21537.2	3509.73	96.8367	1980-08-18	3624.38	2	0	0	0	0	0	0	0	2	31
1	1980-09-05	200	170	308	103	85	7134.11	2	2	18	27802.3	21537.2	3509.73	96.8367	1980-08-18	3624.38	2	0	0	0	0	0	0	0	2	31
1	1980-09-08	200	170	308	104	85	7210.21	3	2	21	28099.1	21766.9	3585.83	98.9363	1980-08-18	3624.38	3	0	0	0	0	0	0	0	3	31
1	1980-09-11	190	160	308	105	85	7286.71	6	2	24	28397.6	21997.8	3662.33	101.047	1980-08-18	3624.38	5	0	0	0	0	0	0	1	5	31
1	1980-09-16	170	140	308	105	85	7286.71	7	2	29	28397.6	21997.8	3662.33	101.047	1980-08-18	3624.38	6	0	0	0	0	0	1	0	6	31
1	1980-09-19	180	150	308	105	86	7363.61	8	2	32	28697.6	22229.9	3739.23	103.169	1980-08-18	3624.38	6	0	0	0	0	0	1	1	6	31
1	1980-09-22	210	150	308	105	86	7363.61	9	2	35	28697.6	22229.9	3739.23	103.169	1980-08-18	3624.38	7	0	0	0	0	0	1	1	7	31
1	1980-09-25	200	160	308	105	86	7363.61	11	2	38	28697.6	22229.9	3739.23	103.169	1980-08-18	3624.38	7	0	0	0	0	0	1	3	7	31
1	1980-09-29	200	150	308	105	86	7363.61	12	2	42	28697.6	22229.9	3739.23	103.169	1980-08-18	3624.38	8	0	0	0	0	0	1	3	8	31
1	1980-10-02	180	140	308	105	86	7363.61	18	2	45	24911.4	22229.9	3739.23	103.169	1980-08-18	3624.38	10	0	0	0	0	1	2	5	10	31
1	1980-10-06	160	120	308	105	86	7363.61	34	2	49	24911.4	22229.9	3739.23	103.169	1980-08-18	3624.38	12	0	0	0	0	2	15	5	12	31
1	1980-10-09	140	70	308	105	86	7363.61	58	2	52	24911.4	22229.9	3739.23	103.169	1980-08-18	3624.38	12	0	0	0	0	6	20	20	12	31
1	1980-10-13	130	80	308	105	86	7363.61	72	2	56	24911.4	22229.9	3739.23	103.169	1980-08-18	3624.38	12	0	0	0	0	6	0	54	12	31
1	1980-10-16	140	80	308	105	86	7363.61	72	3	59	24911.4	22229.9	3739.23	103.169	1980-08-18	3624.38	12	0	0	0	0	6	0	54	12	31
1	1980-08-18	220	190	309	85	71	4912.17	0	1	0	21469.3	14831.4	0	0	1980-08-18	4912.17	0	0	0	0	0	0	0	0	0	31
1	1980-08-21	220	190	309	95	80	6181.59	1	2	3	27023	18662.5	1269.42	25.8424	1980-08-18	4912.17	1	0	0	0	0	0	0	0	1	31
1	1980-08-26	200	150	309	99	83	6686.01	1	2	8	29229.8	20184.9	1773.84	36.1111	1980-08-18	4912.17	1	0	0	0	0	0	0	0	1	31
1	1980-08-29	200	160	309	100	83	6759.68	2	2	11	29552.2	20407.2	1847.51	37.6109	1980-08-18	4912.17	2	0	0	0	0	0	0	0	2	31
1	1980-09-02	200	160	309	101	84	6908.24	3	2	15	26921.2	20855.6	1996.07	40.6353	1980-08-18	4912.17	3	0	0	0	0	0	0	0	3	31
1	1980-09-05	200	170	309	101	85	6983.13	3	2	18	27213.3	21081.6	2070.96	42.1598	1980-08-18	4912.17	3	0	0	0	0	0	0	0	3	31
1	1980-09-08	200	170	309	101	85	6983.13	4	2	21	27213.3	21081.6	2070.96	42.1598	1980-08-18	4912.17	4	0	0	0	0	0	0	0	4	32
1	1980-09-11	190	160	309	101	85	6983.13	21	2	24	27213.3	21081.6	2070.96	42.1598	1980-08-18	4912.17	18	0	0	0	0	0	3	0	18	32
1	1980-09-16	170	140	309	101	85	6983.13	45	2	29	27213.3	21081.6	2070.96	42.1598	1980-08-18	4912.17	18	0	0	0	0	0	25	2	18	32
1	1980-09-19	180	150	309	101	85	6983.13	73	2	32	27213.3	21081.6	2070.96	42.1598	1980-08-18	4912.17	18	0	0	0	0	0	50	5	18	32
1	1980-09-22	210	150	309	101	85	6983.13	73	2	35	27213.3	21081.6	2070.96	42.1598	1980-08-18	4912.17	18	0	0	0	0	0	20	35	18	32
1	1980-09-25	200	160	309	101	85	6983.13	78	2	38	27213.3	21081.6	2070.96	42.1598	1980-08-18	4912.17	18	0	0	0	0	0	10	50	18	32
1	1980-09-29	200	150	309	101	85	6983.13	98	2	42	27213.3	21081.6	2070.96	42.1598	1980-08-18	4912.17	18	0	0	0	0	0	30	50	18	32
1	1980-10-02	180	140	309	101	85	6983.13	98	3	45	23623.1	21081.6	2070.96	42.1598	1980-08-18	4912.17	18	0	0	0	0	0	30	50	18	32
1	1980-08-18	220	190	310	57	50	2310.96	0	1	0	10089	6980.97	0	0	1980-08-18	2310.96	0	0	0	0	0	0	0	0	0	32
1	1980-08-21	220	190	310	61	52	2577.39	2	2	3	11254.7	7785.08	266.439	11.5294	1980-08-18	2310.96	1	0	1	0	0	0	0	0	2	32
1	1980-08-26	200	150	310	65	55	2906.61	3	2	8	12695	8778.65	595.653	25.7752	1980-08-18	2310.96	1	0	2	0	0	0	0	0	3	32
1	1980-08-29	200	160	310	65	56	2955.25	3	2	11	12907.8	8925.46	644.298	27.8802	1980-08-18	2310.96	1	0	2	0	0	0	0	0	3	32
1	1980-09-02	200	160	310	6	56	775.903	4	2	15	2998.93	2348.18	-1535.05	-66.425	1980-08-18	2310.96	1	0	3	0	0	0	0	0	4	32
1	1980-09-05	200	170	310	66	56	3004.3	4	2	18	11691.9	9073.49	693.347	30.0026	1980-08-18	2310.96	1	0	3	0	0	0	0	0	4	32
1	1980-09-08	200	170	310	66	56	3004.3	5	2	21	11691.9	9073.49	693.347	30.0026	1980-08-18	2310.96	1	0	3	0	0	0	0	1	4	32
1	1980-09-11	190	160	310	67	58	3153.87	6	2	24	12275.4	9524.89	842.916	36.4748	1980-08-18	2310.96	2	0	3	0	0	0	0	1	5	32
1	1980-09-16	170	140	310	67	58	3153.87	6	3	29	12275.4	9524.89	842.916	36.4748	1980-08-18	2310.96	2	0	3	0	0	0	0	1	5	32
1	1980-08-18	220	190	311	65	55	2906.61	0	1	0	12695	8778.65	0	0	1980-08-18	2906.61	0	0	0	0	0	0	0	0	0	32
1	1980-08-21	220	190	311	81	67	4421.27	2	2	3	19321.6	13349.9	1514.67	52.1111	1980-08-18	2906.61	2	0	0	0	0	0	0	0	2	32
1	1980-08-26	200	150	311	86	71	4975.35	3	2	8	21745.7	15022.1	2068.74	71.1736	1980-08-18	2906.61	3	0	0	0	0	0	0	0	3	32
1	1980-08-29	200	160	311	86	73	5102.91	3	2	11	22303.8	15407.1	2196.31	75.5625	1980-08-18	2906.61	3	0	0	0	0	0	0	0	3	32
1	1980-09-02	200	160	311	90	73	5362.89	5	2	15	20892.8	16191.7	2456.29	84.5069	1980-08-18	2906.61	5	0	0	0	0	0	0	0	5	32
1	1980-09-05	200	170	311	90	73	5362.89	8	2	18	20892.8	16191.7	2456.29	84.5069	1980-08-18	2906.61	5	0	0	0	0	0	1	2	5	32
1	1980-09-08	200	170	311	90	75	5495.31	7	2	21	21409.3	16591.3	2588.7	89.0625	1980-08-18	2906.61	0	0	5	0	0	0	0	2	5	32
1	1980-09-11	190	160	311	90	75	5495.31	35	2	24	21409.3	16591.3	2588.7	89.0625	1980-08-18	2906.61	5	0	0	0	0	0	15	15	5	32
1	1980-09-16	170	140	311	90	75	5495.31	45	2	29	21409.3	16591.3	2588.7	89.0625	1980-08-18	2906.61	5	0	0	0	0	0	15	25	5	32
1	1980-09-19	180	150	311	90	75	5495.31	45	3	32	21409.3	16591.3	2588.7	89.0625	1980-08-18	2906.61	5	0	0	0	0	0	15	25	5	32
1	1980-08-18	220	190	312	67	59	3204.54	0	1	0	13998.4	9677.79	0	0	1980-08-18	3204.54	0	0	0	0	0	0	0	0	0	32
1	1980-08-21	220	190	312	70	63	3570.49	2	2	3	15599.4	10782.2	365.95	11.4198	1980-08-18	3204.54	2	0	0	0	0	0	0	0	2	32
1	1980-08-26	200	150	312	72	65	3788.48	2	2	8	16553.2	11440.1	583.946	18.2225	1980-08-18	3204.54	2	0	0	0	0	0	0	0	2	32
1	1980-08-29	200	160	312	74	65	3899.9	2	2	11	17040.6	11776.4	695.366	21.6994	1980-08-18	3204.54	2	0	0	0	0	0	0	0	2	32
1	1980-09-02	200	160	312	75	66	4012.94	3	2	15	15626.6	12117.5	808.4	25.2268	1980-08-18	3204.54	3	0	0	0	0	0	0	0	3	32
1	1980-09-05	200	170	312	75	66	4012.94	20	2	18	15626.6	12117.5	808.4	25.2268	1980-08-18	3204.54	20	0	0	0	0	0	0	0	20	32
1	1980-09-08	200	170	312	75	66	4012.94	30	2	21	15626.6	12117.5	808.4	25.2268	1980-08-18	3204.54	30	0	0	0	0	0	0	0	30	32
1	1980-09-11	190	160	312	75	66	4012.94	39	2	24	15626.6	12117.5	808.4	25.2268	1980-08-18	3204.54	35	0	0	0	0	0	2	2	35	32
1	1980-09-16	170	140	312	75	66	4012.94	81	2	29	15626.6	12117.5	808.4	25.2268	1980-08-18	3204.54	80	0	0	0	0	0	0	1	80	32
1	1980-09-19	180	150	312	75	66	4012.94	95	2	32	15626.6	12117.5	808.4	25.2268	1980-08-18	3204.54	80	0	0	0	0	0	7	8	80	32
1	1980-09-22	210	150	312	75	66	4012.94	95	3	35	15626.6	12117.5	808.4	25.2268	1980-08-18	3204.54	80	0	0	0	0	0	7	8	80	32
1	1980-08-18	220	190	313	81	65	4302.59	3	1	0	18802.4	12991.7	0	0	1980-08-18	4302.59	3	0	0	0	0	0	0	0	3	32
1	1980-08-21	220	190	313	85	69	4787.02	12	2	3	20921.8	14453.7	484.435	11.2591	1980-08-18	4302.59	12	0	0	0	0	0	0	0	12	32
1	1980-08-26	200	150	313	86	70	4912.17	12	2	8	21469.3	14831.4	609.58	14.1678	1980-08-18	4302.59	12	0	0	0	0	0	0	0	12	32
1	1980-08-29	200	160	313	86	72	5038.93	12	2	11	22023.9	15214	736.341	17.1139	1980-08-18	4302.59	12	0	0	0	0	0	0	0	12	32
[truncated: 1,145 more rows]

## Sheet: Description
BS1 1980
A	leaf type: 1=normal, 2=from flower stem
B	date
C	maximum water temperature
D	minimum water temperature
E	leaf number
F	leaf length
G	leaf width
H	leaf surface; H = 1.028*3.1416*((F+G)/4)*((F+G)/4)
I	% total damage; I = R+S+T+U+V+W+X+Y
J	status: 1=first observation of new leaf, 2=next observation, 3=last observation; J = IF(E(x)=E(x+1),(IF(AND(E(x)<>E(x-1),B(x)<>28636.5), 1,2)),3)
K	leaf age; K = B-P
L	potential biomass / month; L = (3.018+H)+6.506
M	potential biomass - overall; TODO???
N	absolute growth since day of first occurrence; N = H-Q
O	relative growth since day of first occurrence; O = (H-Q)/Q*100
P	date of first occurrence; P = IF(E(x)=E(x-1),P(x-1),B(x))
Q	begin surface of leaf; Q = IF(E(x)=E(x-1),Q(x-1),H(x))
R	% damage Cricotopus
S	% damage Elophyla
T	% danage snails
U	% damage Fulica atra consumption
V	% damage Fulica atra beak
W	% damage Septoria villarsiae Desm.
X	% damage yellow
Y	% damage decay
Z	% damage sum fauna; Z = R+S+T+U
