# Supplementary material for: Initial decomposition of floating leaf blades of Nymphoides peltata (S.G. Gmel.) O. Kuntze (Menyanthaceae): causes, impact and succession
Source: PeerJ. 2023 Dec 21;11:e16689. doi: 10.7717/peerj.16689 (PMC10749093; doi:10.7717/peerj.16689)
Supplement: Supplemental Information 4 [file peerj-11-16689-s004.xlsx]

## Sheet: Basic data
Basic data: leaf type, date, leaf nr, leaf length, leaf width, surface, tot % damage, leaf status, leaf age, damage types of plts CB-1 1978-1979, CB-2 1978-1979, BS-1 1980, BS-2 1980
Leaf type	Date	Max temp	Min temp	Leaf #	Length	Width	Surface	Tot % dam	Status	Age	Pot Biom/m	Pot Biom/a	Abs grow	Rel grow	Crea date	Begin surf	Cricotopus	Elophila	snails	Fulica cons	Fulica beak	Septoria	yellow	decayed	sum fauna
Plot 6, Nymphoides peltata, Bemmelse Strang 2, 1980
1	1980-05-19	200	170	1	43	43	1492.87	75	2	0	4511.98	898	0	0	1980-05-19	1492.87	75	0	0	0	0	0	0	0	75	1
1	1980-05-22	210	160	1	43	43	1492.87	75	2	3	4511.98	898	0	0	1980-05-19	1492.87	75	0	0	0	0	0	0	0	75	1
1	1980-05-27	190	140	1	43	43	1492.87	80	2	8	4511.98	899	0	0	1980-05-19	1492.87	80	0	0	0	0	0	0	0	80	1
1	1980-05-29	200	160	1	43	43	1492.87	80	3	10	4511.98	900	0	0	1980-05-19	1492.87	80	0	0	0	0	0	0	0	80	1
1	1980-05-19	200	170	2	40	40	1291.83	5	1	0	3905.24	901	0	0	1980-05-19	1291.83	5	0	0	0	0	0	0	0	5	1
1	1980-05-22	210	160	2	40	40	1291.83	5	3	3	3905.24	902	0	0	1980-05-19	1291.83	5	0	0	0	0	0	0	0	5	1
1	1980-05-19	200	170	3	37	39	1165.87	40	1	0	3525.11	903	0	0	1980-05-19	1165.87	40	0	0	0	0	0	0	0	40	1
1	1980-05-22	210	160	3	37	39	1165.87	40	3	3	3525.11	904	0	0	1980-05-19	1165.87	40	0	0	0	0	0	0	0	40	1
1	1980-05-19	200	170	4	31	29	726.652	15	1	0	2199.54	905	0	0	1980-05-19	726.652	15	0	0	0	0	0	0	0	15	1
1	1980-05-22	210	160	4	31	29	726.652	15	3	3	2199.54	906	0	0	1980-05-19	726.652	15	0	0	0	0	0	0	0	15	1
1	1980-05-19	200	170	5	49	47	1860.23	5	1	0	5620.68	907	0	0	1980-05-19	1860.23	5	0	0	0	0	0	0	0	5	1
1	1980-05-22	210	160	5	49	47	1860.23	5	3	3	5620.68	908	0	0	1980-05-19	1860.23	5	0	0	0	0	0	0	0	5	1
1	1980-05-22	210	160	7	54	50	2183.19	5	1	0	6595.36	909	0	0	1980-05-22	2183.19	5	0	0	0	0	0	0	0	5	1
1	1980-05-27	190	140	7	58	55	2577.39	10	2	5	7785.08	910	394.209	18.0566	1980-05-22	2183.19	10	0	0	0	0	0	0	0	10	1
1	1980-05-29	200	160	7	58	55	2577.39	25	2	7	7785.08	911	394.209	18.0566	1980-05-22	2183.19	25	0	0	0	0	0	0	0	25	1
1	1980-06-02	200	150	7	59	55	2623.21	25	2	11	7923.37	912	440.028	20.1553	1980-05-22	2183.19	25	0	0	0	0	0	0	0	25	1
1	1980-06-05	190	150	7	59	60	2858.37	30	2	14	8633.06	913	675.181	30.9264	1980-05-22	2183.19	30	0	0	0	0	0	0	0	30	1
1	1980-06-09	270	180	7	59	62	2955.25	30	2	18	8925.46	914	772.068	35.3643	1980-05-22	2183.19	30	0	0	0	0	0	0	0	30	1
1	1980-06-12	220	190	7	59	62	2955.25	100	2	21	8925.46	915	772.068	35.3643	1980-05-22	2183.19	30	0	0	0	0	0	20	50	30	1
1	1980-06-16	250	190	7	59	62	2955.25	100	3	25	8925.46	916	772.068	35.3643	1980-05-22	2183.19	30	0	0	0	0	0	20	50	30	1
1	1980-05-22	210	160	8	50	50	2018.48	0	1	0	6098.27	917	0	0	1980-05-22	2018.48	0	0	0	0	0	0	0	0	0	1
1	1980-05-27	190	140	8	58	60	2810.53	0	2	5	8488.68	918	792.051	39.24	1980-05-22	2018.48	0	0	0	0	0	0	0	0	0	1
1	1980-05-29	200	160	8	58	60	2810.53	0	2	7	8488.68	919	792.051	39.24	1980-05-22	2018.48	0	0	0	0	0	0	0	0	0	1
1	1980-06-02	200	150	8	60	60	2906.61	5	2	11	8778.65	920	888.13	44	1980-05-22	2018.48	5	0	0	0	0	0	0	0	5	1
1	1980-06-05	190	150	8	61	60	2955.25	5	2	14	8925.46	921	936.776	46.41	1980-05-22	2018.48	5	0	0	0	0	0	0	0	5	1
1	1980-06-09	270	180	8	61	60	2955.25	10	2	18	8925.46	922	936.776	46.41	1980-05-22	2018.48	10	0	0	0	0	0	0	0	10	1
1	1980-06-12	220	190	8	61	60	2955.25	100	2	21	8925.46	923	936.776	46.41	1980-05-22	2018.48	25	0	0	0	0	0	65	10	25	1
1	1980-06-16	250	190	8	61	60	2955.25	100	3	25	8925.46	924	936.776	46.41	1980-05-22	2018.48	25	0	0	0	0	0	65	10	25	1
1	1980-05-22	210	160	9	58	55	2577.39	5	1	0	7785.08	925	0	0	1980-05-22	2577.39	5	0	0	0	0	0	0	0	5	1
1	1980-05-27	190	140	9	64	60	3103.61	5	2	5	9373.21	926	526.217	20.4166	1980-05-22	2577.39	5	0	0	0	0	0	0	0	5	1
1	1980-05-29	200	160	9	64	60	3103.61	15	2	7	9373.21	927	526.217	20.4166	1980-05-22	2577.39	15	0	0	0	0	0	0	0	15	1
1	1980-06-02	200	150	9	66	62	3307.07	20	2	11	9987.26	928	729.68	28.3108	1980-05-22	2577.39	20	0	0	0	0	0	0	0	20	1
1	1980-06-05	190	150	9	66	62	3307.07	20	2	14	9987.26	929	729.68	28.3108	1980-05-22	2577.39	20	0	0	0	0	0	0	0	20	1
1	1980-06-09	270	180	9	66	64	3411.23	25	2	18	10301.6	930	833.833	32.3518	1980-05-22	2577.39	25	0	0	0	0	0	0	0	25	1
1	1980-06-12	220	190	9	66	66	3517	45	2	21	10620.8	931	939.602	36.4555	1980-05-22	2577.39	40	0	0	0	0	0	0	5	40	1
1	1980-06-16	250	190	9	66	66	3517	45	3	25	10620.8	932	939.602	36.4555	1980-05-22	2577.39	40	0	0	0	0	0	0	5	40	1
1	1980-05-22	210	160	10	52	50	2100.02	30	1	0	6344.38	933	0	0	1980-05-22	2100.02	30	0	0	0	0	0	0	0	30	1
1	1980-05-27	190	140	10	55	54	2398.15	35	2	5	7244.13	934	298.129	14.1965	1980-05-22	2100.02	35	0	0	0	0	0	0	0	35	1
1	1980-05-29	200	160	10	56	58	2623.21	35	2	7	7923.37	935	523.189	24.9135	1980-05-22	2100.02	35	0	0	0	0	0	0	0	35	1
1	1980-06-02	200	150	10	59	58	2763.09	35	2	11	8345.53	936	663.07	31.5744	1980-05-22	2100.02	35	0	0	0	0	0	0	0	35	1
1	1980-06-05	190	150	10	59	58	2763.09	35	2	14	8345.53	937	663.07	31.5744	1980-05-22	2100.02	35	0	0	0	0	0	0	0	35	1
1	1980-06-09	270	180	10	59	58	2763.09	35	2	18	8345.53	938	663.07	31.5744	1980-05-22	2100.02	35	0	0	0	0	0	0	0	35	1
1	1980-06-12	220	190	10	59	58	2763.09	75	2	21	8345.53	939	663.07	31.5744	1980-05-22	2100.02	50	0	0	0	0	0	25	0	50	1
1	1980-06-16	250	190	10	59	58	2763.09	75	3	25	8345.53	940	663.07	31.5744	1980-05-22	2100.02	50	0	0	0	0	0	25	0	50	1
1	1980-05-22	210	160	11	40	40	1291.83	5	1	0	3905.24	941	0	0	1980-05-22	1291.83	5	0	0	0	0	0	0	0	5	1
1	1980-05-27	190	140	11	48	45	1745.78	30	2	5	5275.27	942	453.956	35.1406	1980-05-22	1291.83	30	0	0	0	0	0	0	0	30	1
1	1980-05-29	200	160	11	48	45	1745.78	30	2	7	5275.27	943	453.956	35.1406	1980-05-22	1291.83	30	0	0	0	0	0	0	0	30	1
1	1980-06-02	200	150	11	48	48	1860.23	30	2	11	5620.68	944	568.403	44	1980-05-22	1291.83	30	0	0	0	0	0	0	0	30	1
1	1980-06-05	190	150	11	48	50	1938.55	30	2	14	5857.04	945	646.72	50.0625	1980-05-22	1291.83	30	0	0	0	0	0	0	0	30	1
1	1980-06-09	270	180	11	48	50	1938.55	30	2	18	5857.04	946	646.72	50.0625	1980-05-22	1291.83	30	0	0	0	0	0	0	0	30	1
1	1980-06-12	220	190	11	48	50	1938.55	100	2	21	5857.04	947	646.72	50.0625	1980-05-22	1291.83	40	0	0	0	0	0	60	0	40	1
1	1980-06-16	250	190	11	48	50	1938.55	100	3	25	5857.04	948	646.72	50.0625	1980-05-22	1291.83	40	0	0	0	0	0	60	0	40	1
1	1980-05-27	190	140	12	75	70	4243.85	25	1	0	12814.4	949	0	0	1980-05-27	4243.85	25	0	0	0	0	0	0	0	25	1
1	1980-05-29	200	160	12	76	70	4302.59	30	2	2	12991.7	950	58.7377	1.38407	1980-05-27	4243.85	25	0	5	0	0	0	0	0	30	1
1	1980-06-02	200	150	12	78	70	4421.27	35	2	6	13349.9	951	177.424	4.18074	1980-05-27	4243.85	25	0	10	0	0	0	0	0	35	1
1	1980-06-05	190	150	12	79	70	4481.22	35	2	9	13530.8	952	237.373	5.59334	1980-05-27	4243.85	25	0	10	0	0	0	0	0	35	1
1	1980-06-09	270	180	12	82	70	4663.49	45	2	13	14080.9	953	419.642	9.88823	1980-05-27	4243.85	25	0	10	0	0	0	10	0	35	1
1	1980-06-12	220	190	12	82	70	4663.49	50	2	16	14080.9	954	419.642	9.88823	1980-05-27	4243.85	30	0	10	0	0	0	10	0	40	1
1	1980-06-16	250	190	12	82	70	4663.49	97	2	20	14080.9	955	419.642	9.88823	1980-05-27	4243.85	65	0	10	0	0	0	20	2	75	1
1	1980-06-23	170	150	12	82	70	4663.49	97	3	27	14080.9	956	419.642	9.88823	1980-05-27	4243.85	65	0	10	0	0	0	20	2	75	2
1	1980-05-27	190	140	13	68	56	3103.61	0	1	0	9373.21	957	0	0	1980-05-27	3103.61	0	0	0	0	0	0	0	0	0	2
1	1980-05-29	200	160	13	79	69	4421.27	0	2	2	13349.9	958	1317.66	42.4558	1980-05-27	3103.61	0	0	0	0	0	0	0	0	0	2
1	1980-06-02	200	150	13	86	74	5167.3	0	2	6	15601.4	959	2063.69	66.4932	1980-05-27	3103.61	0	0	0	0	0	0	0	0	0	2
1	1980-06-05	190	150	13	86	76	5297.29	1	2	9	15993.7	960	2193.68	70.6816	1980-05-27	3103.61	1	0	0	0	0	0	0	0	1	2
1	1980-06-09	270	180	13	88	77	5495.31	1	2	13	16591.3	961	2391.69	77.0617	1980-05-27	3103.61	1	0	0	0	0	0	0	0	1	2
1	1980-06-12	220	190	13	88	77	5495.31	5	2	16	16591.3	962	2391.69	77.0617	1980-05-27	3103.61	5	0	0	0	0	0	0	0	5	2
1	1980-06-16	250	190	13	89	77	5562.12	35	2	20	16793	963	2458.51	79.2144	1980-05-27	3103.61	35	0	0	0	0	0	0	0	35	2
1	1980-06-23	170	150	13	89	77	5562.12	95	2	27	16793	964	2458.51	79.2144	1980-05-27	3103.61	90	0	0	0	0	0	0	5	90	2
1	1980-06-26	170	150	13	89	77	5562.12	100	2	30	16793	965	2458.51	79.2144	1980-05-27	3103.61	90	0	0	0	0	0	4	6	90	2
1	1980-06-30	180	150	13	89	77	5562.12	100	2	34	16793	966	2458.51	79.2144	1980-05-27	3103.61	90	0	0	0	0	0	4	6	90	2
1	1980-07-03	180	150	13	89	77	5562.12	100	3	37	16793	967	2458.51	79.2144	1980-05-27	3103.61	90	0	0	0	0	0	4	6	90	2
1	1980-05-27	190	140	14	62	52	2623.21	0	1	0	7923.37	968	0	0	1980-05-27	2623.21	0	0	0	0	0	0	0	0	0	2
1	1980-05-29	200	160	14	72	62	3624.38	0	2	2	10944.9	969	1001.17	38.1656	1980-05-27	2623.21	0	0	0	0	0	0	0	0	0	2
1	1980-06-02	200	150	14	79	69	4421.27	0	2	6	13349.9	970	1798.06	68.5442	1980-05-27	2623.21	0	0	0	0	0	0	0	0	0	2
1	1980-06-05	190	150	14	79	69	4421.27	0	2	9	13349.9	971	1798.06	68.5442	1980-05-27	2623.21	0	0	0	0	0	0	0	0	0	2
1	1980-06-09	270	180	14	81	72	4725.06	5	2	13	14266.7	972	2101.84	80.1247	1980-05-27	2623.21	5	0	0	0	0	0	0	0	5	2
1	1980-06-12	220	190	14	81	72	4725.06	5	2	16	14266.7	973	2101.84	80.1247	1980-05-27	2623.21	5	0	0	0	0	0	0	0	5	2
1	1980-06-16	250	190	14	81	72	4725.06	30	2	20	14266.7	974	2101.84	80.1247	1980-05-27	2623.21	30	0	0	0	0	0	0	0	30	2
1	1980-06-23	170	150	14	81	72	4725.06	30	3	27	14266.7	975	2101.84	80.1247	1980-05-27	2623.21	30	0	0	0	0	0	0	0	30	2
1	1980-05-27	190	140	15	64	60	3103.61	0	1	0	9373.21	976	0	0	1980-05-27	3103.61	0	0	0	0	0	0	0	0	0	2
1	1980-05-29	200	160	15	67	62	3358.95	5	2	2	10143.8	977	255.337	8.22711	1980-05-27	3103.61	5	0	0	0	0	0	0	0	5	2
1	1980-06-02	200	150	15	69	64	3570.49	5	2	6	10782.2	978	466.874	15.0429	1980-05-27	3103.61	5	0	0	0	0	0	0	0	5	2
1	1980-06-05	190	150	15	70	66	3733.38	5	2	9	11273.8	979	629.765	20.2914	1980-05-27	3103.61	5	0	0	0	0	0	0	0	5	2
1	1980-06-09	270	180	15	70	67	3788.48	5	2	13	11440.1	980	684.87	22.0669	1980-05-27	3103.61	5	0	0	0	0	0	0	0	5	2
1	1980-06-12	220	190	15	70	67	3788.48	10	2	16	11440.1	981	684.87	22.0669	1980-05-27	3103.61	10	0	0	0	0	0	0	0	10	2
1	1980-06-16	250	190	15	70	67	3788.48	50	2	20	11440.1	982	684.87	22.0669	1980-05-27	3103.61	35	0	0	0	0	0	10	5	35	2
1	1980-06-23	170	150	15	70	67	3788.48	50	3	27	11440.1	983	684.87	22.0669	1980-05-27	3103.61	35	0	0	0	0	0	10	5	35	2
1	1980-05-27	190	140	16	42	40	1357.22	5	1	0	4102.61	984	0	0	1980-05-27	1357.22	5	0	0	0	0	0	0	0	5	2
1	1980-05-29	200	160	16	42	42	1424.24	10	2	2	4304.86	985	67.0135	4.93754	1980-05-27	1357.22	10	0	0	0	0	0	0	0	10	2
1	1980-06-02	200	150	16	44	42	1492.87	10	2	6	4511.98	986	135.642	9.99405	1980-05-27	1357.22	10	0	0	0	0	0	0	0	10	2
1	1980-06-05	190	150	16	44	42	1492.87	10	2	9	4511.98	987	135.642	9.99405	1980-05-27	1357.22	10	0	0	0	0	0	0	0	10	2
1	1980-06-09	270	180	16	45	44	1598.84	15	2	13	4831.79	988	241.612	17.8019	1980-05-27	1357.22	15	0	0	0	0	0	0	0	15	2
1	1980-06-12	220	190	16	45	44	1598.84	100	2	16	4831.79	989	241.612	17.8019	1980-05-27	1357.22	40	0	0	0	0	0	55	5	40	2
1	1980-06-16	250	190	16	45	44	1598.84	100	3	20	4831.79	990	241.612	17.8019	1980-05-27	1357.22	40	0	0	0	0	0	55	5	40	2
1	1980-05-27	190	140	17	70	66	3733.38	5	1	0	11273.8	991	0	0	1980-05-27	3733.38	5	0	0	0	0	0	0	0	5	2
1	1980-05-29	200	160	17	70	66	3733.38	5	2	2	11273.8	992	0	0	1980-05-27	3733.38	5	0	0	0	0	0	0	0	5	2
1	1980-06-02	200	150	17	71	67	3843.99	8	2	6	11607.7	993	110.613	2.9628	1980-05-27	3733.38	8	0	0	0	0	0	0	0	8	2
1	1980-06-05	190	150	17	71	69	3956.22	8	2	9	11946.4	994	222.84	5.96886	1980-05-27	3733.38	8	0	0	0	0	0	0	0	8	2
1	1980-06-09	270	180	17	74	69	4127.59	10	2	13	12463.6	995	394.209	10.559	1980-05-27	3733.38	10	0	0	0	0	0	0	0	10	2
1	1980-06-12	220	190	17	74	69	4127.59	25	2	16	12463.6	996	394.209	10.559	1980-05-27	3733.38	25	0	0	0	0	0	0	0	25	2
1	1980-06-16	250	190	17	74	69	4127.59	70	2	20	12463.6	997	394.209	10.559	1980-05-27	3733.38	60	0	0	0	0	0	10	0	60	2
1	1980-06-23	170	150	17	74	69	4127.59	70	3	27	12463.6	998	394.209	10.559	1980-05-27	3733.38	60	0	0	0	0	0	10	0	60	2
1	1980-05-27	190	140	18	60	54	2623.21	0	1	0	7923.37	999	0	0	1980-05-27	2623.21	0	0	0	0	0	0	0	0	0	2
1	1980-05-29	200	160	18	64	58	3004.3	0	2	2	9073.49	1000	381.089	14.5275	1980-05-27	2623.21	0	0	0	0	0	0	0	0	0	2
1	1980-06-02	200	150	18	65	58	3053.76	0	2	6	9222.74	1001	430.541	16.4127	1980-05-27	2623.21	0	0	0	0	0	0	0	0	0	2
1	1980-06-05	190	150	18	67	60	3255.6	3	2	9	9831.92	1002	632.389	24.1074	1980-05-27	2623.21	3	0	0	0	0	0	0	0	3	2
1	1980-06-09	270	180	18	68	61	3358.95	3	2	13	10143.8	1003	735.735	28.0471	1980-05-27	2623.21	3	0	0	0	0	0	0	0	3	2
1	1980-06-12	220	190	18	68	61	3358.95	10	2	16	10143.8	1004	735.735	28.0471	1980-05-27	2623.21	10	0	0	0	0	0	0	0	10	2
1	1980-06-16	250	190	18	68	61	3358.95	20	2	20	10143.8	1005	735.735	28.0471	1980-05-27	2623.21	20	0	0	0	0	0	0	0	20	2
1	1980-06-23	170	150	18	68	61	3358.95	20	3	27	10143.8	1006	735.735	28.0471	1980-05-27	2623.21	20	0	0	0	0	0	0	0	20	2
1	1980-05-27	190	140	19	65	58	3053.76	0	1	0	9222.74	1007	0	0	1980-05-27	3053.76	0	0	0	0	0	0	0	0	0	2
1	1980-05-29	200	160	19	70	64	3624.38	0	2	2	10944.9	1008	570.624	18.686	1980-05-27	3053.76	0	0	0	0	0	0	0	0	0	2
1	1980-06-02	200	150	19	74	66	3956.22	0	2	6	11946.4	1009	902.462	29.5525	1980-05-27	3053.76	0	0	0	0	0	0	0	0	0	2
1	1980-06-05	190	150	19	76	67	4127.59	0	2	9	12463.6	1010	1073.83	35.1643	1980-05-27	3053.76	0	0	0	0	0	0	0	0	0	2
1	1980-06-09	270	180	19	78	70	4421.27	1	2	13	13349.9	1011	1367.52	44.7815	1980-05-27	3053.76	1	0	0	0	0	0	0	0	1	2
1	1980-06-12	220	190	19	78	70	4421.27	5	2	16	13349.9	1012	1367.52	44.7815	1980-05-27	3053.76	5	0	0	0	0	0	0	0	5	2
1	1980-06-16	250	190	19	78	70	4421.27	30	2	20	13349.9	1013	1367.52	44.7815	1980-05-27	3053.76	25	0	0	0	0	0	5	0	25	2
1	1980-06-23	170	150	19	78	70	4421.27	30	3	27	13349.9	1014	1367.52	44.7815	1980-05-27	3053.76	25	0	0	0	0	0	5	0	25	2
1	1980-05-27	190	140	20	35	40	1135.39	40	1	0	3433.12	1015	0	0	1980-05-27	1135.39	40	0	0	0	0	0	0	0	40	2
1	1980-05-29	200	160	20	38	40	1228.04	40	2	2	3712.74	1016	92.6481	8.16	1980-05-27	1135.39	40	0	0	0	0	0	0	0	40	2
1	1980-06-02	200	150	20	40	40	1291.83	40	2	6	3905.24	1017	156.432	13.7778	1980-05-27	1135.39	40	0	0	0	0	0	0	0	40	3
1	1980-06-05	190	150	20	40	40	1291.83	40	2	9	3905.24	1018	156.432	13.7778	1980-05-27	1135.39	40	0	0	0	0	0	0	0	40	3
1	1980-06-09	270	180	20	40	40	1291.83	40	3	13	3905.24	1019	156.432	13.7778	1980-05-27	1135.39	40	0	0	0	0	0	0	0	40	3
1	1980-05-27	190	140	21	56	51	2310.96	0	1	0	6980.97	1020	0	0	1980-05-27	2310.96	0	0	0	0	0	0	0	0	0	3
1	1980-05-29	200	160	21	60	57	2763.09	0	2	2	8345.53	1021	452.139	19.565	1980-05-27	2310.96	0	0	0	0	0	0	0	0	0	3
1	1980-06-02	200	150	21	62	57	2858.37	0	2	6	8633.06	1022	547.411	23.6877	1980-05-27	2310.96	0	0	0	0	0	0	0	0	0	3
1	1980-06-05	190	150	21	62	58	2906.61	0	2	9	8778.65	1023	595.653	25.7752	1980-05-27	2310.96	0	0	0	0	0	0	0	0	0	3
1	1980-06-09	270	180	21	63	59	3004.3	5	2	13	9073.49	1024	693.347	30.0026	1980-05-27	2310.96	5	0	0	0	0	0	0	0	5	3
1	1980-06-12	220	190	21	63	59	3004.3	25	2	16	9073.49	1025	693.347	30.0026	1980-05-27	2310.96	25	0	0	0	0	0	0	0	25	3
1	1980-06-16	250	190	21	63	63	3204.54	70	2	20	9677.79	1026	893.58	38.6671	1980-05-27	2310.96	55	0	0	0	0	0	10	5	55	3
1	1980-06-23	170	150	21	63	63	3204.54	70	3	27	9677.79	1027	893.58	38.6671	1980-05-27	2310.96	55	0	0	0	0	0	10	5	55	3
1	1980-05-29	200	160	22	60	46	2267.96	0	1	0	6851.21	1028	0	0	1980-05-29	2267.96	0	0	0	0	0	0	0	0	0	3
1	1980-06-02	200	150	22	71	59	3411.23	0	2	4	10301.6	1029	1143.27	50.4094	1980-05-29	2267.96	0	0	0	0	0	0	0	0	0	3
1	1980-06-05	190	150	22	77	63	3956.22	0	2	7	11946.4	1030	1688.25	74.4393	1980-05-29	2267.96	0	0	0	0	0	0	0	0	0	3
1	1980-06-09	270	180	22	79	65	4185.52	5	2	11	12638.4	1031	1917.55	84.5497	1980-05-29	2267.96	5	0	0	0	0	0	0	0	5	3
1	1980-06-12	220	190	22	86	75	5232.1	5	2	14	15797	1032	2964.13	130.696	1980-05-29	2267.96	5	0	0	0	0	0	0	0	5	3
1	1980-06-16	250	190	22	86	75	5232.1	25	2	18	15797	1033	2964.13	130.696	1980-05-29	2267.96	25	0	0	0	0	0	0	0	25	3
1	1980-06-23	170	150	22	86	75	5232.1	25	3	25	15797	1034	2964.13	130.696	1980-05-29	2267.96	25	0	0	0	0	0	0	0	25	3
1	1980-05-29	200	160	23	73	64	3788.48	0	1	0	11440.1	1035	0	0	1980-05-29	3788.48	0	0	0	0	0	0	0	0	0	3
1	1980-06-02	200	150	23	82	70	4663.49	0	2	4	14080.9	1036	875.01	23.0966	1980-05-29	3788.48	0	0	0	0	0	0	0	0	0	3
1	1980-06-05	190	150	23	85	74	5102.91	0	2	7	15407.1	1037	1314.43	34.6955	1980-05-29	3788.48	0	0	0	0	0	0	0	0	0	3
1	1980-06-09	270	180	23	85	75	5167.3	1	2	11	15601.4	1038	1378.82	36.3951	1980-05-29	3788.48	1	0	0	0	0	0	0	0	1	3
1	1980-06-12	220	190	23	86	75	5232.1	5	2	14	15797	1039	1443.62	38.1054	1980-05-29	3788.48	5	0	0	0	0	0	0	0	5	3
1	1980-06-16	250	190	23	86	76	5297.29	25	2	18	15993.7	1040	1508.81	39.8263	1980-05-29	3788.48	20	0	0	0	0	0	5	0	20	3
1	1980-06-23	170	150	23	86	76	5297.29	25	3	25	15993.7	1041	1508.81	39.8263	1980-05-29	3788.48	20	0	0	0	0	0	5	0	20	3
1	1980-05-29	200	160	24	73	63	3733.38	5	1	0	11273.8	1042	0	0	1980-05-29	3733.38	5	0	0	0	0	0	0	0	5	3
1	1980-06-02	200	150	24	75	64	3899.9	5	2	4	11776.4	1043	166.524	4.46042	1980-05-29	3733.38	5	0	0	0	0	0	0	0	5	3
1	1980-06-05	190	150	24	75	65	3956.22	7	2	7	11946.4	1044	222.84	5.96886	1980-05-29	3733.38	7	0	0	0	0	0	0	0	7	3
1	1980-06-09	270	180	24	77	66	4127.59	10	2	11	12463.6	1045	394.209	10.559	1980-05-29	3733.38	10	0	0	0	0	0	0	0	10	3
1	1980-06-12	220	190	24	77	66	4127.59	15	2	14	12463.6	1046	394.209	10.559	1980-05-29	3733.38	15	0	0	0	0	0	0	0	15	3
1	1980-06-16	250	190	24	77	66	4127.59	60	2	18	12463.6	1047	394.209	10.559	1980-05-29	3733.38	40	0	0	0	0	0	15	5	40	3
1	1980-06-23	170	150	24	77	66	4127.59	60	3	25	12463.6	1048	394.209	10.559	1980-05-29	3733.38	40	0	0	0	0	0	15	5	40	3
1	1980-06-02	200	150	25	49	49	1938.55	10	1	0	5857.04	1049	0	0	1980-06-02	1938.55	10	0	0	0	0	0	0	0	10	3
1	1980-06-05	190	150	25	49	49	1938.55	10	3	3	5857.04	1050	0	0	1980-06-02	1938.55	10	0	0	0	0	0	0	0	10	3
1	1980-06-02	200	150	26	69	64	3570.49	0	1	0	10782.2	1051	0	0	1980-06-02	3570.49	0	0	0	0	0	0	0	0	0	3
1	1980-06-05	190	150	26	78	67	4243.85	0	2	3	12814.4	1052	673.364	18.8592	1980-06-02	3570.49	0	0	0	0	0	0	0	0	0	3
1	1980-06-09	270	180	26	82	67	4481.22	0	2	7	13530.8	1053	910.737	25.5074	1980-06-02	3570.49	0	0	0	0	0	0	0	0	0	3
1	1980-06-12	220	190	26	82	69	4602.33	10	2	10	13896.3	1054	1031.85	28.8993	1980-06-02	3570.49	10	0	0	0	0	0	0	0	10	3
1	1980-06-16	250	190	26	82	69	4602.33	20	2	14	13896.3	1055	1031.85	28.8993	1980-06-02	3570.49	20	0	0	0	0	0	0	0	20	3
1	1980-06-23	170	150	26	82	69	4602.33	20	3	21	13896.3	1056	1031.85	28.8993	1980-06-02	3570.49	20	0	0	0	0	0	0	0	20	3
1	1980-06-02	200	150	27	69	52	2955.25	0	1	0	8925.46	1057	0	0	1980-06-02	2955.25	0	0	0	0	0	0	0	0	0	3
1	1980-06-05	190	150	27	74	60	3624.38	0	2	3	10944.9	1058	669.125	22.6419	1980-06-02	2955.25	0	0	0	0	0	0	0	0	0	3
1	1980-06-09	270	180	27	80	65	4243.85	2	2	7	12814.4	1059	1288.6	43.6036	1980-06-02	2955.25	2	0	0	0	0	0	0	0	2	3
1	1980-06-12	220	190	27	83	75	5038.93	5	2	10	15214	1060	2083.67	70.5075	1980-06-02	2955.25	5	0	0	0	0	0	0	0	5	3
1	1980-06-16	250	190	27	83	75	5038.93	20	2	14	15214	1061	2083.67	70.5075	1980-06-02	2955.25	20	0	0	0	0	0	0	0	20	3
1	1980-06-23	170	150	27	83	75	5038.93	20	3	21	15214	1062	2083.67	70.5075	1980-06-02	2955.25	20	0	0	0	0	0	0	0	20	3
1	1980-06-02	200	150	28	66	58	3103.61	0	1	0	9373.21	1063	0	0	1980-06-02	3103.61	0	0	0	0	0	0	0	0	0	3
1	1980-06-05	190	150	28	70	61	3463.91	0	2	3	10460.6	1064	360.298	11.609	1980-06-02	3103.61	0	0	0	0	0	0	0	0	0	3
1	1980-06-09	270	180	28	71	63	3624.38	0	2	7	10944.9	1065	520.767	16.7794	1980-06-02	3103.61	0	0	0	0	0	0	0	0	0	3
1	1980-06-12	220	190	28	71	63	3624.38	5	2	10	10944.9	1066	520.767	16.7794	1980-06-02	3103.61	5	0	0	0	0	0	0	0	5	3
1	1980-06-16	250	190	28	73	65	3843.99	10	2	14	11607.7	1067	740.378	23.8554	1980-06-02	3103.61	10	0	0	0	0	0	0	0	10	3
1	1980-06-23	170	150	28	73	65	3843.99	10	3	21	11607.7	1068	740.378	23.8554	1980-06-02	3103.61	10	0	0	0	0	0	0	0	10	3
1	1980-06-02	200	150	29	81	63	4185.52	0	1	0	12638.4	1069	0	0	1980-06-02	4185.52	0	0	0	0	0	0	0	0	0	3
1	1980-06-05	190	150	29	87	68	4849.39	1	2	3	14642	1070	663.877	15.8613	1980-06-02	4185.52	1	0	0	0	0	0	0	0	1	3
1	1980-06-09	270	180	29	93	73	5562.12	2	2	7	16793	1071	1376.6	32.8897	1980-06-02	4185.52	2	0	0	0	0	0	0	0	2	3
1	1980-06-12	220	190	29	93	73	5562.12	3	2	10	16793	1072	1376.6	32.8897	1980-06-02	4185.52	3	0	0	0	0	0	0	0	3	3
1	1980-06-16	250	190	29	94	74	5696.95	15	2	14	17199.9	1073	1511.44	36.1111	1980-06-02	4185.52	15	0	0	0	0	0	0	0	15	3
1	1980-06-23	170	150	29	94	74	5696.95	20	2	21	17199.9	1074	1511.44	36.1111	1980-06-02	4185.52	20	0	0	0	0	0	0	0	20	3
1	1980-06-26	170	150	29	94	74	5696.95	100	2	24	17199.9	1075	1511.44	36.1111	1980-06-02	4185.52	25	0	0	0	0	0	72	3	25	3
1	1980-06-30	180	150	29	94	74	5696.95	100	3	28	17199.9	1076	1511.44	36.1111	1980-06-02	4185.52	25	0	0	0	0	0	72	3	25	3
1	1980-06-02	200	150	30	74	64	3843.99	0	1	0	11607.7	1077	0	0	1980-06-02	3843.99	0	0	0	0	0	0	0	0	0	3
1	1980-06-05	190	150	30	80	70	4541.58	1	2	3	13713	1078	697.586	18.1474	1980-06-02	3843.99	1	0	0	0	0	0	0	0	1	4
1	1980-06-09	270	180	30	81	72	4725.06	5	2	7	14266.7	1079	881.066	22.9206	1980-06-02	3843.99	5	0	0	0	0	0	0	0	5	4
1	1980-06-12	220	190	30	83	72	4849.39	15	2	10	14642	1080	1005.4	26.1552	1980-06-02	3843.99	15	0	0	0	0	0	0	0	15	4
1	1980-06-16	250	190	30	83	72	4849.39	35	2	14	14642	1081	1005.4	26.1552	1980-06-02	3843.99	35	0	0	0	0	0	0	0	35	4
1	1980-06-23	170	150	30	83	72	4849.39	50	2	21	14642	1082	1005.4	26.1552	1980-06-02	3843.99	50	0	0	0	0	0	0	0	50	4
1	1980-06-26	170	150	30	83	72	4849.39	80	2	24	14642	1083	1005.4	26.1552	1980-06-02	3843.99	80	0	0	0	0	0	0	0	80	4
1	1980-06-30	180	150	30	83	72	4849.39	80	3	28	14642	1084	1005.4	26.1552	1980-06-02	3843.99	80	0	0	0	0	0	0	0	80	4
1	1980-06-02	200	150	31	72	59	3463.91	0	1	0	10460.6	1085	0	0	1980-06-02	3463.91	0	0	0	0	0	0	0	0	0	4
1	1980-06-05	190	150	31	79	64	4127.59	0	2	3	12463.6	1086	663.676	19.1597	1980-06-02	3463.91	0	0	0	0	0	0	0	0	0	4
1	1980-06-09	270	180	31	80	67	4361.73	3	2	7	13170.2	1087	897.819	25.9192	1980-06-02	3463.91	3	0	0	0	0	0	0	0	3	4
1	1980-06-12	220	190	31	80	67	4361.73	10	2	10	13170.2	1088	897.819	25.9192	1980-06-02	3463.91	10	0	0	0	0	0	0	0	10	4
1	1980-06-16	250	190	31	81	67	4421.27	25	2	14	13349.9	1089	957.364	27.6382	1980-06-02	3463.91	25	0	0	0	0	0	0	0	25	4
1	1980-06-23	170	150	31	81	67	4421.27	25	3	21	13349.9	1090	957.364	27.6382	1980-06-02	3463.91	25	0	0	0	0	0	0	0	25	4
1	1980-06-05	190	150	32	68	55	3053.76	5	1	0	9222.74	1091	0	0	1980-06-05	3053.76	5	0	0	0	0	0	0	0	5	4
1	1980-06-09	270	180	32	78	65	4127.59	10	2	4	12463.6	1092	1073.83	35.1643	1980-06-05	3053.76	10	0	0	0	0	0	0	0	10	4
1	1980-06-12	220	190	32	78	66	4185.52	35	2	7	12638.4	1093	1131.76	37.0613	1980-06-05	3053.76	35	0	0	0	0	0	0	0	35	4
1	1980-06-16	250	190	32	80	66	4302.59	40	2	11	12991.7	1094	1248.83	40.895	1980-06-05	3053.76	35	0	0	0	0	0	5	0	35	4
1	1980-06-23	170	150	32	80	66	4302.59	40	3	18	12991.7	1095	1248.83	40.895	1980-06-05	3053.76	35	0	0	0	0	0	5	0	35	4
1	1980-06-05	190	150	33	73	57	3411.23	2	1	0	10301.6	1096	0	0	1980-06-05	3411.23	2	0	0	0	0	0	0	0	2	4
1	1980-06-09	270	180	33	79	62	4012.94	2	2	4	12117.5	1097	601.708	17.6391	1980-06-05	3411.23	2	0	0	0	0	0	0	0	2	4
1	1980-06-12	220	190	33	79	62	4012.94	5	2	7	12117.5	1098	601.708	17.6391	1980-06-05	3411.23	5	0	0	0	0	0	0	0	5	4
1	1980-06-16	250	190	33	79	63	4070.06	20	2	11	12289.9	1099	658.831	19.3136	1980-06-05	3411.23	20	0	0	0	0	0	0	0	20	4
1	1980-06-23	170	150	33	79	63	4070.06	20	3	18	12289.9	1100	658.831	19.3136	1980-06-05	3411.23	20	0	0	0	0	0	0	0	20	4
1	1980-06-05	190	150	34	62	51	2577.39	1	1	0	7785.08	1101	0	0	1980-06-05	2577.39	1	0	0	0	0	0	0	0	1	4
1	1980-06-09	270	180	34	72	61	3570.49	15	2	4	10782.2	1102	993.091	38.5308	1980-06-05	2577.39	15	0	0	0	0	0	0	0	15	4
1	1980-06-12	220	190	34	72	62	3624.38	20	2	7	10944.9	1103	1046.98	40.6218	1980-06-05	2577.39	20	0	0	0	0	0	0	0	20	4
1	1980-06-16	250	190	34	72	62	3624.38	20	2	11	10944.9	1104	1046.98	40.6218	1980-06-05	2577.39	20	0	0	0	0	0	0	0	20	4
1	1980-06-23	170	150	34	72	62	3624.38	20	3	18	10944.9	1105	1046.98	40.6218	1980-06-05	2577.39	20	0	0	0	0	0	0	0	20	4
1	1980-06-09	270	180	35	88	71	5102.91	5	1	0	15407.1	1106	0	0	1980-06-09	5102.91	5	0	0	0	0	0	0	0	5	4
1	1980-06-12	220	190	35	93	72	5495.31	15	2	3	16591.3	1107	392.392	7.68957	1980-06-09	5102.91	15	0	0	0	0	0	0	0	15	4
1	1980-06-16	250	190	35	93	76	5764.98	20	2	7	17405.2	1108	662.061	12.9742	1980-06-09	5102.91	20	0	0	0	0	0	0	0	20	4
1	1980-06-23	170	150	35	93	76	5764.98	20	2	14	17405.2	1109	662.061	12.9742	1980-06-09	5102.91	20	0	0	0	0	0	0	0	20	4
1	1980-06-26	170	150	35	93	76	5764.98	30	2	17	17405.2	1110	662.061	12.9742	1980-06-09	5102.91	20	0	0	0	0	0	5	5	20	4
1	1980-06-30	180	150	35	93	76	5764.98	30	3	21	17405.2	1111	662.061	12.9742	1980-06-09	5102.91	20	0	0	0	0	0	5	5	20	4
1	1980-06-09	270	180	36	79	62	4012.94	8	1	0	12117.5	1112	0	0	1980-06-09	4012.94	8	0	0	0	0	0	0	0	8	4
1	1980-06-12	220	190	36	80	66	4302.59	15	2	3	12991.7	1113	289.652	7.21795	1980-06-09	4012.94	15	0	0	0	0	0	0	0	15	4
1	1980-06-16	250	190	36	85	74	5102.91	25	2	7	15407.1	1114	1089.98	27.1616	1980-06-09	4012.94	25	0	0	0	0	0	0	0	25	4
1	1980-06-23	170	150	36	85	74	5102.91	25	3	14	15407.1	1115	1089.98	27.1616	1980-06-09	4012.94	25	0	0	0	0	0	0	0	25	4
1	1980-06-09	270	180	37	66	54	2906.61	1	1	0	8778.65	1116	0	0	1980-06-09	2906.61	1	0	0	0	0	0	0	0	1	4
1	1980-06-12	220	190	37	66	55	2955.25	10	2	3	8925.46	1117	48.6453	1.67361	1980-06-09	2906.61	10	0	0	0	0	0	0	0	10	4
1	1980-06-16	250	190	37	66	55	2955.25	30	2	7	8925.46	1118	48.6453	1.67361	1980-06-09	2906.61	30	0	0	0	0	0	0	0	30	4
1	1980-06-23	170	150	37	66	55	2955.25	30	3	14	8925.46	1119	48.6453	1.67361	1980-06-09	2906.61	30	0	0	0	0	0	0	0	30	4
1	1980-06-09	270	180	38	67	56	3053.76	1	1	0	9222.74	1120	0	0	1980-06-09	3053.76	1	0	0	0	0	0	0	0	1	4
1	1980-06-12	220	190	38	76	64	3956.22	2	2	3	11946.4	1121	902.462	29.5525	1980-06-09	3053.76	2	0	0	0	0	0	0	0	2	4
1	1980-06-16	250	190	38	84	70	4787.02	5	2	7	14453.7	1122	1733.27	56.7585	1980-06-09	3053.76	5	0	0	0	0	0	0	0	5	4
1	1980-06-23	170	150	38	87	72	5102.91	5	2	14	15407.1	1123	2049.16	67.1029	1980-06-09	3053.76	5	0	0	0	0	0	0	0	5	4
1	1980-06-26	170	150	38	89	74	5362.89	100	2	17	16191.7	1124	2309.14	75.6164	1980-06-09	3053.76	7	0	0	0	0	0	93	0	7	4
1	1980-06-30	180	150	38	89	74	5362.89	100	3	21	16191.7	1125	2309.14	75.6164	1980-06-09	3053.76	7	0	0	0	0	0	93	0	7	4
1	1980-06-09	270	180	39	66	55	2955.25	2	1	0	8925.46	1126	0	0	1980-06-09	2955.25	2	0	0	0	0	0	0	0	2	4
1	1980-06-12	220	190	39	68	57	3153.87	3	2	3	9524.89	1127	198.618	6.72085	1980-06-09	2955.25	3	0	0	0	0	0	0	0	3	4
1	1980-06-16	250	190	39	68	62	3411.23	15	2	7	10301.6	1128	455.974	15.4293	1980-06-09	2955.25	15	0	0	0	0	0	0	0	15	4
1	1980-06-23	170	150	39	68	62	3411.23	15	3	14	10301.6	1129	455.974	15.4293	1980-06-09	2955.25	15	0	0	0	0	0	0	0	15	4
1	1980-06-09	270	180	40	75	58	3570.49	3	1	0	10782.2	1130	0	0	1980-06-09	3570.49	3	0	0	0	0	0	0	0	3	4
1	1980-06-12	220	190	40	76	59	3678.68	5	2	3	11108.8	1131	108.19	3.03013	1980-06-09	3570.49	5	0	0	0	0	0	0	0	5	4
1	1980-06-16	250	190	40	76	61	3788.48	18	2	7	11440.1	1132	217.996	6.10549	1980-06-09	3570.49	18	0	0	0	0	0	0	0	18	4
1	1980-06-23	170	150	40	76	61	3788.48	18	3	14	11440.1	1133	217.996	6.10549	1980-06-09	3570.49	18	0	0	0	0	0	0	0	18	4
1	1980-06-09	270	180	41	71	57	3307.07	3	1	0	9987.26	1134	0	0	1980-06-09	3307.07	3	0	0	0	0	0	0	0	3	4
1	1980-06-12	220	190	41	74	60	3624.38	7	2	3	10944.9	1135	317.305	9.59473	1980-06-09	3307.07	7	0	0	0	0	0	0	0	7	4
1	1980-06-16	250	190	41	76	60	3733.38	15	2	7	11273.8	1136	426.303	12.8906	1980-06-09	3307.07	15	0	0	0	0	0	0	0	15	4
1	1980-06-23	170	150	41	76	60	3733.38	15	3	14	11273.8	1137	426.303	12.8906	1980-06-09	3307.07	15	0	0	0	0	0	0	0	15	4
1	1980-06-09	270	180	42	68	55	3053.76	2	1	0	9222.74	1138	0	0	1980-06-09	3053.76	2	0	0	0	0	0	0	0	2	4
1	1980-06-12	220	190	42	79	63	4070.06	10	2	3	12289.9	1139	1016.3	33.2805	1980-06-09	3053.76	2	8	0	0	0	0	0	0	10	5
1	1980-06-16	250	190	42	84	70	4787.02	15	2	7	14453.7	1140	1733.27	56.7585	1980-06-09	3053.76	5	10	0	0	0	0	0	0	15	5
1	1980-06-23	170	150	42	84	70	4787.02	15	3	14	14453.7	1141	1733.27	56.7585	1980-06-09	3053.76	5	10	0	0	0	0	0	0	15	5
1	1980-06-09	270	180	43	79	63	4070.06	1	1	0	12289.9	1142	0	0	1980-06-09	4070.06	1	0	0	0	0	0	0	0	1	5
1	1980-06-12	220	190	43	82	65	4361.73	5	2	3	13170.2	1143	291.67	7.16624	1980-06-09	4070.06	5	0	0	0	0	0	0	0	5	5
1	1980-06-16	250	190	43	85	70	4849.39	15	2	7	14642	1144	779.334	19.148	1980-06-09	4070.06	15	0	0	0	0	0	0	0	15	5
1	1980-06-23	170	150	43	85	70	4849.39	15	3	14	14642	1145	779.334	19.148	1980-06-09	4070.06	15	0	0	0	0	0	0	0	15	5
1	1980-06-09	270	180	44	75	64	3899.9	1	1	0	11776.4	1146	0	0	1980-06-09	3899.9	1	0	0	0	0	0	0	0	1	5
1	1980-06-12	220	190	44	83	73	4912.17	3	2	3	14831.4	1147	1012.27	25.9562	1980-06-09	3899.9	3	0	0	0	0	0	0	0	3	5
1	1980-06-16	250	190	44	90	78	5696.95	5	2	7	17199.9	1148	1797.05	46.0794	1980-06-09	3899.9	5	0	0	0	0	0	0	0	5	5
1	1980-06-23	170	150	44	92	82	6111.14	5	2	14	18449.9	1149	2211.24	56.7	1980-06-09	3899.9	5	0	0	0	0	0	0	0	5	5
1	1980-06-26	170	150	44	92	81	6041.1	5	2	17	18238.6	1150	2141.2	54.904	1980-06-09	3899.9	5	0	0	0	0	0	0	0	5	5
1	1980-06-30	180	150	44	92	82	6111.14	55	2	21	18449.9	1151	2211.24	56.7	1980-06-09	3899.9	5	0	0	0	0	0	50	0	5	5
1	1980-07-03	180	150	44	92	82	6111.14	100	2	24	18449.9	1152	2211.24	56.7	1980-06-09	3899.9	5	0	0	0	0	0	45	50	5	5
1	1980-07-07	200	160	44	92	82	6111.14	100	3	28	18449.9	1153	2211.24	56.7	1980-06-09	3899.9	5	0	0	0	0	0	45	50	5	5
1	1980-06-09	270	180	45	73	61	3624.38	2	1	0	10944.9	1154	0	0	1980-06-09	3624.38	2	0	0	0	0	0	0	0	2	5
1	1980-06-12	220	190	45	75	64	3899.9	2	2	3	11776.4	1155	275.522	7.60192	1980-06-09	3624.38	2	0	0	0	0	0	0	0	2	5
1	1980-06-16	250	190	45	81	67	4421.27	8	2	7	13349.9	1156	796.895	21.9871	1980-06-09	3624.38	8	0	0	0	0	0	0	0	8	5
1	1980-06-23	170	150	45	81	67	4421.27	8	3	14	13349.9	1157	796.895	21.9871	1980-06-09	3624.38	8	0	0	0	0	0	0	0	8	5
1	1980-06-09	270	180	46	54	46	2018.48	3	1	0	6098.27	1158	0	0	1980-06-09	2018.48	3	0	0	0	0	0	0	0	3	5
1	1980-06-12	220	190	46	57	48	2225.37	20	2	3	6722.68	1159	206.894	10.25	1980-06-09	2018.48	20	0	0	0	0	0	0	0	20	5
1	1980-06-16	250	190	46	57	48	2225.37	40	2	7	6722.68	1160	206.894	10.25	1980-06-09	2018.48	40	0	0	0	0	0	0	0	40	5
1	1980-06-23	170	150	46	57	48	2225.37	40	3	14	6722.68	1161	206.894	10.25	1980-06-09	2018.48	40	0	0	0	0	0	0	0	40	5
1	1980-06-12	220	190	47	66	58	3103.61	5	1	0	9373.21	1162	0	0	1980-06-12	3103.61	5	0	0	0	0	0	0	0	5	5
1	1980-06-16	250	190	47	69	60	3358.95	10	2	4	10143.8	1163	255.337	8.22711	1980-06-12	3103.61	10	0	0	0	0	0	0	0	10	5
1	1980-06-23	170	150	47	69	60	3358.95	10	3	11	10143.8	1164	255.337	8.22711	1980-06-12	3103.61	10	0	0	0	0	0	0	0	10	5
1	1980-06-12	220	190	48	70	56	3204.54	3	1	0	9677.79	1165	0	0	1980-06-12	3204.54	3	0	0	0	0	0	0	0	3	5
1	1980-06-16	250	190	48	75	63	3843.99	15	2	4	11607.7	1166	639.454	19.9546	1980-06-12	3204.54	15	0	0	0	0	0	0	0	15	5
1	1980-06-23	170	150	48	80	63	4127.59	15	2	11	12463.6	1167	923.05	28.8045	1980-06-12	3204.54	15	0	0	0	0	0	0	0	15	5
1	1980-06-26	170	150	48	80	65	4243.85	100	2	14	12814.4	1168	1039.31	32.4326	1980-06-12	3204.54	18	0	0	0	0	0	82	0	18	5
1	1980-06-30	180	150	48	80	65	4243.85	100	3	18	12814.4	1169	1039.31	32.4326	1980-06-12	3204.54	18	0	0	0	0	0	82	0	18	5
1	1980-06-12	220	190	49	71	60	3463.91	3	1	0	10460.6	1170	0	0	1980-06-12	3463.91	3	0	0	0	0	0	0	0	3	5
1	1980-06-16	250	190	49	80	68	4421.27	10	2	4	13349.9	1171	957.364	27.6382	1980-06-12	3463.91	10	0	0	0	0	0	0	0	10	5
1	1980-06-23	170	150	49	83	70	4725.06	30	2	11	14266.7	1172	1261.15	36.4081	1980-06-12	3463.91	25	0	0	0	0	0	5	0	25	5
1	1980-06-26	170	150	49	83	70	4725.06	45	2	14	14266.7	1173	1261.15	36.4081	1980-06-12	3463.91	30	0	0	0	0	0	10	5	30	5
1	1980-06-30	180	150	49	83	70	4725.06	60	2	18	14266.7	1174	1261.15	36.4081	1980-06-12	3463.91	30	0	0	0	0	0	10	20	30	5
1	1980-07-03	180	150	49	83	70	4725.06	70	2	21	14266.7	1175	1261.15	36.4081	1980-06-12	3463.91	35	0	0	0	0	0	5	30	35	5
1	1980-07-07	200	160	49	83	70	4725.06	85	2	25	14266.7	1176	1261.15	36.4081	1980-06-12	3463.91	35	0	0	0	0	0	5	45	35	5
1	1980-07-11	180	160	49	83	70	4725.06	85	3	29	14266.7	1177	1261.15	36.4081	1980-06-12	3463.91	35	0	0	0	0	0	5	45	35	5
1	1980-06-16	250	190	50	61	62	3053.76	1	1	0	9222.74	1178	0	0	1980-06-16	3053.76	1	0	0	0	0	0	0	0	1	5
1	1980-06-23	170	150	50	68	66	3624.38	1	2	7	10944.9	1179	570.624	18.686	1980-06-16	3053.76	1	0	0	0	0	0	0	0	1	5
1	1980-06-26	170	150	50	75	71	4302.59	2	2	10	12991.7	1180	1248.83	40.895	1980-06-16	3053.76	2	0	0	0	0	0	0	0	2	5
1	1980-06-30	180	150	50	75	71	4302.59	2	3	14	12991.7	1181	1248.83	40.895	1980-06-16	3053.76	2	0	0	0	0	0	0	0	2	5
1	1980-06-16	250	190	51	55	50	2225.37	3	1	0	6722.68	1182	0	0	1980-06-16	2225.37	3	0	0	0	0	0	0	0	3	5
1	1980-06-23	170	150	51	62	56	2810.53	5	2	7	8488.68	1183	585.157	26.2948	1980-06-16	2225.37	5	0	0	0	0	0	0	0	5	5
1	1980-06-26	170	150	51	69	62	3463.91	30	2	10	10460.6	1184	1238.54	55.6553	1980-06-16	2225.37	10	0	20	0	0	0	0	0	30	5
1	1980-06-30	180	150	51	76	70	4302.59	35	2	14	12991.7	1185	2077.22	93.3424	1980-06-16	2225.37	15	0	20	0	0	0	0	0	35	5
1	1980-07-03	180	150	51	76	70	4302.59	35	2	17	12991.7	1186	2077.22	93.3424	1980-06-16	2225.37	15	0	20	0	0	0	0	0	35	5
1	1980-07-07	200	160	51	76	70	4302.59	35	3	21	12991.7	1187	2077.22	93.3424	1980-06-16	2225.37	15	0	20	0	0	0	0	0	35	5
1	1980-06-16	250	190	52	55	49	2183.19	2	1	0	6595.36	1188	0	0	1980-06-16	2183.19	2	0	0	0	0	0	0	0	2	5
1	1980-06-23	170	150	52	68	61	3358.95	10	2	7	10143.8	1189	1175.76	53.8554	1980-06-16	2183.19	10	0	0	0	0	0	0	0	10	5
1	1980-06-26	170	150	52	68	61	3358.95	15	2	10	10143.8	1190	1175.76	53.8554	1980-06-16	2183.19	15	0	0	0	0	0	0	0	15	5
1	1980-06-30	180	150	52	68	61	3358.95	15	3	14	10143.8	1191	1175.76	53.8554	1980-06-16	2183.19	15	0	0	0	0	0	0	0	15	5
1	1980-06-16	250	190	53	65	56	2955.25	3	1	0	8925.46	1192	0	0	1980-06-16	2955.25	3	0	0	0	0	0	0	0	3	5
1	1980-06-23	170	150	53	79	68	4361.73	15	2	7	13170.2	1193	1406.48	47.5924	1980-06-16	2955.25	15	0	0	0	0	0	0	0	15	5
1	1980-06-26	170	150	53	81	70	4602.33	20	2	10	13896.3	1194	1647.08	55.7339	1980-06-16	2955.25	20	0	0	0	0	0	0	0	20	5
1	1980-06-30	180	150	53	81	70	4602.33	62	2	14	13896.3	1195	1647.08	55.7339	1980-06-16	2955.25	60	0	0	0	0	0	2	0	60	5
1	1980-07-03	180	150	53	81	70	4602.33	62	2	17	13896.3	1196	1647.08	55.7339	1980-06-16	2955.25	60	0	0	0	0	0	2	0	60	5
1	1980-07-07	200	160	53	81	70	4602.33	63	2	21	13896.3	1197	1647.08	55.7339	1980-06-16	2955.25	60	0	0	0	0	0	3	0	60	5
1	1980-07-11	180	160	53	81	70	4602.33	73	2	25	13896.3	1198	1647.08	55.7339	1980-06-16	2955.25	60	0	0	0	0	1	2	10	60	5
1	1980-07-15	170	150	53	81	70	4602.33	100	2	29	13896.3	1199	1647.08	55.7339	1980-06-16	2955.25	60	0	0	0	0	1	2	37	60	5
1	1980-07-18	180	150	53	81	70	4602.33	100	3	32	13896.3	1200	1647.08	55.7339	1980-06-16	2955.25	60	0	0	0	0	1	2	37	60	6
1	1980-06-16	250	190	54	73	62	3678.68	5	1	0	11108.8	1201	0	0	1980-06-16	3678.68	5	0	0	0	0	0	0	0	5	6
1	1980-06-23	170	150	54	78	66	4185.52	5	2	7	12638.4	1202	506.84	13.7778	1980-06-16	3678.68	5	0	0	0	0	0	0	0	5	6
1	1980-06-26	170	150	54	78	68	4302.59	5	2	10	12991.7	1203	623.912	16.9602	1980-06-16	3678.68	5	0	0	0	0	0	0	0	5	6
1	1980-06-30	180	150	54	79	68	4361.73	85	2	14	13170.2	1204	683.053	18.5679	1980-06-16	3678.68	5	0	0	0	0	0	75	5	5	6
1	1980-07-03	180	150	54	79	68	4361.73	85	3	17	13170.2	1205	683.053	18.5679	1980-06-16	3678.68	5	0	0	0	0	0	75	5	5	6
1	1980-06-16	250	190	55	74	61	3678.68	2	1	0	11108.8	1206	0	0	1980-06-16	3678.68	2	0	0	0	0	0	0	0	2	6
1	1980-06-23	170	150	55	74	61	3678.68	2	3	7	11108.8	1207	0	0	1980-06-16	3678.68	2	0	0	0	0	0	0	0	2	6
1	1980-06-16	250	190	56	83	69	4663.49	5	1	0	14080.9	1208	0	0	1980-06-16	4663.49	5	0	0	0	0	0	0	0	5	6
1	1980-06-23	170	150	56	91	79	5833.4	5	2	7	17611.7	1209	1169.91	25.0866	1980-06-16	4663.49	5	0	0	0	0	0	0	0	5	6
1	1980-06-26	170	150	56	91	79	5833.4	5	2	10	17611.7	1210	1169.91	25.0866	1980-06-16	4663.49	5	0	0	0	0	0	0	0	5	6
1	1980-06-30	180	150	56	91	79	5833.4	5	2	14	17611.7	1211	1169.91	25.0866	1980-06-16	4663.49	5	0	0	0	0	0	0	0	5	6
1	1980-07-03	180	150	56	91	80	5902.23	65	2	17	17819.4	1212	1238.74	26.5625	1980-06-16	4663.49	10	0	0	0	0	0	50	5	10	6
1	1980-07-07	200	160	56	91	80	5902.23	65	3	21	17819.4	1213	1238.74	26.5625	1980-06-16	4663.49	10	0	0	0	0	0	50	5	10	6
1	1980-06-16	250	190	57	80	66	4302.59	3	1	0	12991.7	1214	0	0	1980-06-16	4302.59	3	0	0	0	0	0	0	0	3	6
1	1980-06-23	170	150	57	84	70	4787.02	5	2	7	14453.7	1215	484.435	11.2591	1980-06-16	4302.59	5	0	0	0	0	0	0	0	5	6
1	1980-06-26	170	150	57	84	70	4787.02	8	2	10	14453.7	1216	484.435	11.2591	1980-06-16	4302.59	8	0	0	0	0	0	0	0	8	6
1	1980-06-30	180	150	57	85	71	4912.17	8	2	14	14831.4	1217	609.58	14.1678	1980-06-16	4302.59	8	0	0	0	0	0	0	0	8	6
1	1980-07-03	180	150	57	85	71	4912.17	8	2	17	14831.4	1218	609.58	14.1678	1980-06-16	4302.59	8	0	0	0	0	0	0	0	8	6
1	1980-07-07	200	160	57	66	73	3899.9	8	2	21	11776.4	1219	-402.686	-9.35917	1980-06-16	4302.59	8	0	0	0	0	0	0	0	8	6
1	1980-07-11	180	160	57	66	73	3899.9	83	2	25	11776.4	1220	-402.686	-9.35917	1980-06-16	4302.59	8	0	0	0	0	0	50	25	8	6
1	1980-07-15	170	150	57	66	73	3899.9	83	3	29	11776.4	1221	-402.686	-9.35917	1980-06-16	4302.59	8	0	0	0	0	0	50	25	8	6
1	1980-06-16	250	190	58	81	68	4481.22	15	1	0	13530.8	1222	0	0	1980-06-16	4481.22	15	0	0	0	0	0	0	0	15	6
1	1980-06-23	170	150	58	81	68	4481.22	20	2	7	13530.8	1223	0	0	1980-06-16	4481.22	20	0	0	0	0	0	0	0	20	6
1	1980-06-26	170	150	58	82	72	4787.02	20	2	10	14453.7	1224	305.799	6.82402	1980-06-16	4481.22	20	0	0	0	0	0	0	0	20	6
1	1980-06-30	180	150	58	82	72	4787.02	50	2	14	14453.7	1225	305.799	6.82402	1980-06-16	4481.22	25	0	0	0	0	0	25	0	25	6
1	1980-07-03	180	150	58	83	72	4849.39	65	2	17	14642	1226	368.17	8.21585	1980-06-16	4481.22	25	0	0	0	0	0	30	10	25	6
1	1980-07-07	200	160	58	83	72	4849.39	85	2	21	14642	1227	368.17	8.21585	1980-06-16	4481.22	25	0	0	0	0	0	30	30	25	6
1	1980-07-11	180	160	58	83	72	4849.39	85	3	25	14642	1228	368.17	8.21585	1980-06-16	4481.22	25	0	0	0	0	0	30	30	25	6
1	1980-06-16	250	190	59	81	66	4361.73	5	1	0	13170.2	1229	0	0	1980-06-16	4361.73	5	0	0	0	0	0	0	0	5	6
1	1980-06-23	170	150	59	83	66	4481.22	5	2	7	13530.8	1230	119.494	2.7396	1980-06-16	4361.73	5	0	0	0	0	0	0	0	5	6
1	1980-06-26	170	150	59	83	66	4481.22	5	3	10	13530.8	1231	119.494	2.7396	1980-06-16	4361.73	5	0	0	0	0	0	0	0	5	6
1	1980-06-16	250	190	60	41	38	1259.73	2	1	0	3808.38	1232	0	0	1980-06-16	1259.73	2	0	0	0	0	0	0	0	2	6
1	1980-06-23	170	150	60	41	38	1259.73	2	3	7	3808.38	1233	0	0	1980-06-16	1259.73	2	0	0	0	0	0	0	0	2	6
1	1980-06-16	250	190	61	60	49	2398.15	2	1	0	7244.13	1234	0	0	1980-06-16	2398.15	2	0	0	0	0	0	0	0	2	6
1	1980-06-23	170	150	61	64	54	2810.53	5	2	7	8488.68	1235	412.375	17.1955	1980-06-16	2398.15	5	0	0	0	0	0	0	0	5	6
1	1980-06-26	170	150	61	69	60	3358.95	25	2	10	10143.8	1236	960.796	40.064	1980-06-16	2398.15	25	0	0	0	0	0	0	0	25	6
1	1980-06-30	180	150	61	70	60	3411.23	40	2	14	10301.6	1237	1013.07	42.2439	1980-06-16	2398.15	30	0	0	0	0	0	10	0	30	6
1	1980-07-03	180	150	61	70	60	3411.23	40	3	17	10301.6	1238	1013.07	42.2439	1980-06-16	2398.15	30	0	0	0	0	0	10	0	30	6
1	1980-06-16	250	190	62	46	42	1563.11	1	1	0	4723.97	1239	0	0	1980-06-16	1563.11	1	0	0	0	0	0	0	0	1	6
1	1980-06-23	170	150	62	46	42	1563.11	1	3	7	4723.97	1240	0	0	1980-06-16	1563.11	1	0	0	0	0	0	0	0	1	6
1	1980-06-16	250	190	63	71	58	3358.95	10	1	0	10143.8	1241	0	0	1980-06-16	3358.95	2	0	8	0	0	0	0	0	10	6
1	1980-06-23	170	150	63	71	58	3358.95	10	3	7	10143.8	1242	0	0	1980-06-16	3358.95	2	0	8	0	0	0	0	0	10	6
1	1980-06-23	170	150	64	73	61	3624.38	1	1	0	10944.9	1243	0	0	1980-06-23	3624.38	0	0	1	0	0	0	0	0	1	6
1	1980-06-26	170	150	64	82	67	4481.22	2	2	3	13530.8	1244	856.844	23.6411	1980-06-23	3624.38	0	0	2	0	0	0	0	0	2	6
1	1980-06-30	180	150	64	87	72	5102.91	2	2	7	15407.1	1245	1478.54	40.7942	1980-06-23	3624.38	0	0	2	0	0	0	0	0	2	6
1	1980-07-03	180	150	64	91	76	5629.33	3	2	10	16995.8	1246	2004.95	55.3186	1980-06-23	3624.38	1	0	2	0	0	0	0	0	3	6
1	1980-07-07	200	160	64	94	77	5902.23	4	2	14	17819.4	1247	2277.85	62.8481	1980-06-23	3624.38	2	0	2	0	0	0	0	0	4	6
1	1980-07-11	180	160	64	94	78	5971.47	5	2	18	18028.4	1248	2347.09	64.7583	1980-06-23	3624.38	3	0	2	0	0	0	0	0	5	6
1	1980-07-15	170	150	64	94	79	6041.1	6	2	22	18238.6	1249	2416.72	66.6797	1980-06-23	3624.38	4	0	2	0	0	0	0	0	6	6
1	1980-07-18	180	150	64	94	80	6111.14	14	2	25	18449.9	1250	2486.76	68.6122	1980-06-23	3624.38	7	0	3	0	0	0	2	2	10	6
1	1980-07-21	160	150	64	94	80	6111.14	27	2	28	18449.9	1251	2486.76	68.6122	1980-06-23	3624.38	7	0	3	0	0	0	7	10	10	6
1	1980-07-25	180	150	64	95	80	6181.59	70	2	32	18662.5	1252	2557.21	70.5558	1980-06-23	3624.38	7	0	3	0	0	0	25	35	10	6
1	1980-07-29	250	150	64	95	80	6181.59	70	3	36	18662.5	1253	2557.21	70.5558	1980-06-23	3624.38	7	0	3	0	0	0	25	35	10	6
1	1980-06-23	170	150	65	49	55	2183.19	2	1	0	6595.36	1254	0	0	1980-06-23	2183.19	0	0	2	0	0	0	0	0	2	6
1	1980-06-26	170	150	65	51	57	2354.35	2	2	3	7111.94	1255	171.167	7.84024	1980-06-23	2183.19	0	0	2	0	0	0	0	0	2	6
1	1980-06-30	180	150	65	55	58	2577.39	5	2	7	7785.08	1256	394.209	18.0566	1980-06-23	2183.19	3	0	2	0	0	0	0	0	5	6
1	1980-07-03	180	150	65	56	59	2669.44	8	2	10	8062.87	1257	486.251	22.2726	1980-06-23	2183.19	6	0	2	0	0	0	0	0	8	6
1	1980-07-07	200	160	65	58	63	2955.25	15	2	14	8925.46	1258	772.068	35.3643	1980-06-23	2183.19	13	0	2	0	0	0	0	0	15	6
1	1980-07-11	180	160	65	58	63	2955.25	65	2	18	8925.46	1259	772.068	35.3643	1980-06-23	2183.19	13	0	2	0	0	0	25	25	15	6
1	1980-07-15	170	150	65	58	63	2955.25	65	3	22	8925.46	1260	772.068	35.3643	1980-06-23	2183.19	13	0	2	0	0	0	25	25	15	6
1	1980-06-23	170	150	66	54	50	2183.19	2	1	0	6595.36	1261	0	0	1980-06-23	2183.19	0	0	2	0	0	0	0	0	2	7
1	1980-06-26	170	150	66	55	51	2267.96	5	2	3	6851.21	1262	84.7761	3.88314	1980-06-23	2183.19	0	0	5	0	0	0	0	0	5	7
1	1980-06-30	180	150	66	55	52	2310.96	5	2	7	6980.97	1263	127.77	5.85244	1980-06-23	2183.19	0	0	5	0	0	0	0	0	5	7
1	1980-07-03	180	150	66	58	53	2486.97	5	2	10	7512.17	1264	303.781	13.9146	1980-06-23	2183.19	0	0	5	0	0	0	0	0	5	7
1	1980-07-07	200	160	66	58	53	2486.97	20	2	14	7512.17	1265	303.781	13.9146	1980-06-23	2183.19	5	0	5	0	0	0	5	5	10	7
1	1980-07-11	180	160	66	58	53	2486.97	20	3	18	7512.17	1266	303.781	13.9146	1980-06-23	2183.19	5	0	5	0	0	0	5	5	10	7
1	1980-06-23	170	150	67	63	54	2763.09	1	1	0	8345.53	1267	0	0	1980-06-23	2763.09	1	0	0	0	0	0	0	0	1	7
1	1980-06-26	170	150	67	64	54	2810.53	2	2	3	8488.68	1268	47.4342	1.71671	1980-06-23	2763.09	2	0	0	0	0	0	0	0	2	7
1	1980-06-30	180	150	67	65	55	2906.61	3	2	7	8778.65	1269	143.514	5.19395	1980-06-23	2763.09	3	0	0	0	0	0	0	0	3	7
1	1980-07-03	180	150	67	65	55	2906.61	13	2	10	8778.65	1270	143.514	5.19395	1980-06-23	2763.09	8	0	0	0	0	0	0	5	8	7
1	1980-07-07	200	160	67	65	56	2955.25	15	2	14	8925.46	1271	192.159	6.95449	1980-06-23	2763.09	8	0	0	0	0	0	0	7	8	7
1	1980-07-11	180	160	67	65	56	2955.25	15	3	18	8925.46	1272	192.159	6.95449	1980-06-23	2763.09	8	0	0	0	0	0	0	7	8	7
1	1980-06-26	170	150	68	81	65	4302.59	5	1	0	12991.7	1273	0	0	1980-06-26	4302.59	0	0	5	0	0	0	0	0	5	7
1	1980-06-30	180	150	68	97	81	6395.35	7	2	4	19307.7	1274	2092.76	48.6395	1980-06-26	4302.59	2	0	5	0	0	0	0	0	7	7
1	1980-07-03	180	150	68	103	85	7134.11	7	2	7	21537.2	1275	2831.52	65.8097	1980-06-26	4302.59	2	0	5	0	0	0	0	0	7	7
1	1980-07-07	200	160	68	106	89	7675.26	12	2	11	23170.4	1276	3372.67	78.3871	1980-06-26	4302.59	7	0	5	0	0	0	0	0	12	7
1	1980-07-11	180	160	68	107	91	7913.24	13	2	15	23888.7	1277	3610.65	83.9182	1980-06-26	4302.59	8	0	5	0	0	0	0	0	13	7
1	1980-07-15	170	150	68	108	90	7913.24	15	2	19	23888.7	1278	3610.65	83.9182	1980-06-26	4302.59	9	0	6	0	0	0	0	0	15	7
1	1980-07-18	180	150	68	108	91	7993.37	48	2	22	24130.5	1279	3690.79	85.7806	1980-06-26	4302.59	14	0	6	0	0	0	25	3	20	7
1	1980-07-21	160	150	68	108	93	8154.85	55	2	25	24617.9	1280	3852.27	89.5337	1980-06-26	4302.59	14	0	6	0	0	0	10	25	20	7
1	1980-07-25	180	150	68	108	92	8073.91	80	2	29	24373.6	1281	3771.32	87.6525	1980-06-26	4302.59	14	0	6	0	0	0	10	50	20	7
1	1980-07-29	250	150	68	108	92	8073.91	80	3	33	24373.6	1282	3771.32	87.6525	1980-06-26	4302.59	14	0	6	0	0	0	10	50	20	7
1	1980-06-26	170	150	69	53	47	2018.48	1	1	0	6098.27	1283	0	0	1980-06-26	2018.48	0	0	1	0	0	0	0	0	1	7
1	1980-06-30	180	150	69	61	53	2623.21	2	2	4	7923.37	1284	604.736	29.96	1980-06-26	2018.48	0	0	2	0	0	0	0	0	2	7
1	1980-07-03	180	150	69	62	55	2763.09	5	2	7	8345.53	1285	744.617	36.89	1980-06-26	2018.48	3	0	2	0	0	0	0	0	5	7
1	1980-07-07	200	160	69	65	56	2955.25	12	2	11	8925.46	1286	936.776	46.41	1980-06-26	2018.48	10	0	2	0	0	0	0	0	12	7
1	1980-07-11	180	160	69	65	60	3153.87	12	2	15	9524.89	1287	1135.39	56.25	1980-06-26	2018.48	10	0	2	0	0	0	0	0	12	7
1	1980-07-15	170	150	69	65	61	3204.54	17	2	19	9677.79	1288	1186.06	58.76	1980-06-26	2018.48	10	0	2	0	0	0	5	0	12	7
1	1980-07-18	180	150	69	65	61	3204.54	17	3	22	9677.79	1289	1186.06	58.76	1980-06-26	2018.48	10	0	2	0	0	0	5	0	12	7
1	1980-06-26	170	150	70	68	60	3307.07	1	1	0	9987.26	1290	0	0	1980-06-26	3307.07	0	0	1	0	0	0	0	0	1	7
1	1980-06-30	180	150	70	81	69	4541.58	3	2	4	13713	1291	1234.5	37.3291	1980-06-26	3307.07	2	0	1	0	0	0	0	0	3	7
1	1980-07-03	180	150	70	86	73	5102.91	6	2	7	15407.1	1292	1795.84	54.303	1980-06-26	3307.07	3	0	3	0	0	0	0	0	6	7
1	1980-07-07	200	160	70	88	76	5428.9	12	2	11	16390.9	1293	2121.82	64.1602	1980-06-26	3307.07	7	0	5	0	0	0	0	0	12	7
1	1980-07-11	180	160	70	92	77	5764.98	12	2	15	17405.2	1294	2457.9	74.3225	1980-06-26	3307.07	7	0	5	0	0	0	0	0	12	7
1	1980-07-15	170	150	70	92	77	5764.98	12	2	19	17405.2	1295	2457.9	74.3225	1980-06-26	3307.07	7	0	5	0	0	0	0	0	12	7
1	1980-07-18	180	150	70	92	77	5764.98	12	2	22	17405.2	1296	2457.9	74.3225	1980-06-26	3307.07	7	0	5	0	0	0	0	0	12	7
1	1980-07-21	160	150	70	92	78	5833.4	13	2	25	17611.7	1297	2526.33	76.3916	1980-06-26	3307.07	7	0	5	0	0	0	0	1	12	7
1	1980-07-25	180	150	70	92	78	5833.4	22	2	29	17611.7	1298	2526.33	76.3916	1980-06-26	3307.07	10	0	5	0	0	0	4	3	15	7
1	1980-07-29	250	150	70	92	80	5971.47	22	2	33	18028.4	1299	2664.39	80.5664	1980-06-26	3307.07	10	0	5	0	0	0	2	5	15	7
1	1980-08-01	250	200	70	92	80	5971.47	70	2	36	18028.4	1300	2664.39	80.5664	1980-06-26	3307.07	10	0	5	0	0	0	30	25	15	7
1	1980-08-04	260	210	70	92	80	5971.47	70	3	39	18028.4	1301	2664.39	80.5664	1980-06-26	3307.07	10	0	5	0	0	0	30	25	15	7
1	1980-06-26	170	150	71	61	56	2763.09	2	1	0	8345.53	1302	0	0	1980-06-26	2763.09	0	0	2	0	0	0	0	0	2	7
1	1980-06-30	180	150	71	71	65	3733.38	8	2	4	11273.8	1303	970.282	35.1158	1980-06-26	2763.09	6	0	2	0	0	0	0	0	8	7
1	1980-07-03	180	150	71	75	65	3956.22	12	2	7	11946.4	1304	1193.12	43.1807	1980-06-26	2763.09	10	0	2	0	0	0	0	0	12	7
1	1980-07-07	200	160	71	77	69	4302.59	22	2	11	12991.7	1305	1539.49	55.7163	1980-06-26	2763.09	20	0	2	0	0	0	0	0	22	7
1	1980-07-11	180	160	71	78	70	4421.27	22	2	15	13349.9	1306	1658.18	60.0117	1980-06-26	2763.09	20	0	2	0	0	0	0	0	22	7
1	1980-07-15	170	150	71	78	70	4421.27	22	2	19	13349.9	1307	1658.18	60.0117	1980-06-26	2763.09	20	0	2	0	0	0	0	0	22	7
1	1980-07-18	180	150	71	78	70	4421.27	45	2	22	13349.9	1308	1658.18	60.0117	1980-06-26	2763.09	20	0	2	0	0	0	20	3	22	7
1	1980-07-21	160	150	71	78	70	4421.27	45	3	25	13349.9	1309	1658.18	60.0117	1980-06-26	2763.09	20	0	2	0	0	0	20	3	22	7
1	1980-06-26	170	150	72	65	59	3103.61	5	1	0	9373.21	1310	0	0	1980-06-26	3103.61	5	0	0	0	0	0	0	0	5	7
1	1980-06-30	180	150	72	66	63	3358.95	15	2	4	10143.8	1311	255.337	8.22711	1980-06-26	3103.61	15	0	0	0	0	0	0	0	15	7
1	1980-07-03	180	150	72	68	70	3843.99	15	2	7	11607.7	1312	740.378	23.8554	1980-06-26	3103.61	15	0	0	0	0	0	0	0	15	7
1	1980-07-07	200	160	72	72	70	4070.06	25	2	11	12289.9	1313	966.447	31.1394	1980-06-26	3103.61	25	0	0	0	0	0	0	0	25	7
1	1980-07-11	180	160	72	72	72	4185.52	25	2	15	12638.4	1314	1081.9	34.8595	1980-06-26	3103.61	25	0	0	0	0	0	0	0	25	7
1	1980-07-15	170	150	72	72	72	4185.52	30	2	19	12638.4	1315	1081.9	34.8595	1980-06-26	3103.61	30	0	0	0	0	0	0	0	30	7
1	1980-07-18	180	150	72	72	72	4185.52	70	2	22	12638.4	1316	1081.9	34.8595	1980-06-26	3103.61	30	0	0	0	0	0	25	15	30	7
1	1980-07-21	160	150	72	72	72	4185.52	70	3	25	12638.4	1317	1081.9	34.8595	1980-06-26	3103.61	30	0	0	0	0	0	25	15	30	7
1	1980-06-26	170	150	73	52	55	2310.96	10	1	0	6980.97	1318	0	0	1980-06-26	2310.96	10	0	0	0	0	0	0	0	10	7
1	1980-06-30	180	150	73	52	55	2310.96	10	2	4	6980.97	1319	0	0	1980-06-26	2310.96	10	0	0	0	0	0	0	0	10	7
1	1980-07-03	180	150	73	56	55	2486.97	20	2	7	7512.17	1320	176.011	7.61639	1980-06-26	2310.96	15	0	0	0	0	0	5	0	15	7
1	1980-07-07	200	160	73	60	55	2669.44	33	2	11	8062.87	1321	358.482	15.5123	1980-06-26	2310.96	15	0	0	0	0	0	10	8	15	7
1	1980-07-11	180	160	73	60	55	2669.44	33	3	15	8062.87	1322	358.482	15.5123	1980-06-26	2310.96	15	0	0	0	0	0	10	8	15	8
1	1980-06-26	170	150	74	55	52	2310.96	1	1	0	6980.97	1323	0	0	1980-06-26	2310.96	0	0	1	0	0	0	0	0	1	8
1	1980-06-30	180	150	74	65	63	3307.07	1	2	4	9987.26	1324	996.119	43.1042	1980-06-26	2310.96	0	0	1	0	0	0	0	0	1	8
1	1980-07-03	180	150	74	68	67	3678.68	1	2	7	11108.8	1325	1367.72	59.1842	1980-06-26	2310.96	0	0	1	0	0	0	0	0	1	8
1	1980-07-07	200	160	74	68	67	3678.68	1	3	11	11108.8	1326	1367.72	59.1842	1980-06-26	2310.96	0	0	1	0	0	0	0	0	1	8
1	1980-06-30	180	150	75	85	69	4787.02	3	1	0	14453.7	1327	0	0	1980-06-30	4787.02	3	0	0	0	0	0	0	0	3	8
1	1980-07-03	180	150	75	86	73	5102.91	3	2	3	15407.1	1328	315.892	6.59892	1980-06-30	4787.02	3	0	0	0	0	0	0	0	3	8
1	1980-07-07	200	160	75	86	73	5102.91	3	3	7	15407.1	1329	315.892	6.59892	1980-06-30	4787.02	3	0	0	0	0	0	0	0	3	8
1	1980-06-30	180	150	76	58	57	2669.44	0	1	0	8062.87	1330	0	0	1980-06-30	2669.44	0	0	0	0	0	0	0	0	0	8
1	1980-07-03	180	150	76	70	65	3678.68	1	2	3	11108.8	1331	1009.24	37.8072	1980-06-30	2669.44	1	0	0	0	0	0	0	0	1	8
1	1980-07-07	200	160	76	77	71	4421.27	8	2	7	13349.9	1332	1751.84	65.6257	1980-06-30	2669.44	8	0	0	0	0	0	0	0	8	8
1	1980-07-11	180	160	76	79	73	4663.49	8	2	11	14080.9	1333	1994.05	74.6994	1980-06-30	2669.44	8	0	0	0	0	0	0	0	8	8
1	1980-07-15	170	150	76	81	75	4912.17	8	2	15	14831.4	1334	2242.73	84.0151	1980-06-30	2669.44	8	0	0	0	0	0	0	0	8	8
1	1980-07-18	180	150	76	82	75	4975.35	8	2	18	15022.1	1335	2305.91	86.3819	1980-06-30	2669.44	8	0	0	0	0	0	0	0	8	8
1	1980-07-21	160	150	76	83	76	5102.91	8	2	21	15407.1	1336	2433.48	91.1607	1980-06-30	2669.44	8	0	0	0	0	0	0	0	8	8
1	1980-07-25	180	150	76	83	77	5167.3	10	2	25	15601.4	1337	2497.87	93.5728	1980-06-30	2669.44	10	0	0	0	0	0	0	0	10	8
1	1980-07-29	250	150	76	83	77	5167.3	15	2	29	15601.4	1338	2497.87	93.5728	1980-06-30	2669.44	10	0	0	0	0	0	5	0	10	8
1	1980-08-01	250	200	76	83	77	5167.3	15	3	32	15601.4	1339	2497.87	93.5728	1980-06-30	2669.44	10	0	0	0	0	0	5	0	10	8
1	1980-07-03	180	150	77	101	89	7286.71	1	1	0	21997.8	1340	0	0	1980-07-03	7286.71	1	0	0	0	0	0	0	0	1	8
1	1980-07-07	200	160	77	105	94	7993.37	4	2	4	24130.5	1341	706.669	9.69806	1980-07-03	7286.71	4	0	0	0	0	0	0	0	4	8
1	1980-07-11	180	160	77	107	95	8236.2	7	2	8	24863.4	1342	949.492	13.0305	1980-07-03	7286.71	7	0	0	0	0	0	0	0	7	8
1	1980-07-15	170	150	77	108	97	8482.65	10	2	12	25607.2	1343	1195.95	16.4127	1980-07-03	7286.71	10	0	0	0	0	0	0	0	10	8
1	1980-07-18	180	150	77	108	97	8482.65	10	2	15	25607.2	1344	1195.95	16.4127	1980-07-03	7286.71	10	0	0	0	0	0	0	0	10	8
1	1980-07-21	160	150	77	110	99	8816.91	22	2	18	26616	1345	1530.21	21	1980-07-03	7286.71	15	0	0	0	0	0	4	3	15	8
1	1980-07-25	180	150	77	110	100	8901.49	35	2	22	26871.2	1346	1614.78	22.1607	1980-07-03	7286.71	15	0	0	0	0	0	10	10	15	8
1	1980-07-29	250	150	77	110	100	8901.49	35	3	26	26871.2	1347	1614.78	22.1607	1980-07-03	7286.71	15	0	0	0	0	0	10	10	15	8
1	1980-07-03	180	150	78	76	63	3899.9	0	1	0	11776.4	1348	0	0	1980-07-03	3899.9	0	0	0	0	0	0	0	0	0	8
1	1980-07-07	200	160	78	102	83	6908.24	0	2	4	20855.6	1349	3008.34	77.1389	1980-07-03	3899.9	0	0	0	0	0	0	0	0	0	8
1	1980-07-11	180	160	78	107	94	8154.85	3	2	8	24617.9	1350	4254.95	109.104	1980-07-03	3899.9	3	0	0	0	0	0	0	0	3	8
1	1980-07-15	170	150	78	115	96	8986.47	5	2	12	27127.7	1351	5086.56	130.428	1980-07-03	3899.9	5	0	0	0	0	0	0	0	5	8
1	1980-07-18	180	150	78	115	96	8986.47	5	2	15	27127.7	1352	5086.56	130.428	1980-07-03	3899.9	5	0	0	0	0	0	0	0	5	8
1	1980-07-21	160	150	78	118	99	9504.81	7	2	18	28692	1353	5604.91	143.719	1980-07-03	3899.9	7	0	0	0	0	0	0	0	7	8
1	1980-07-25	180	150	78	118	100	9592.61	14	2	22	28957	1354	5692.71	145.971	1980-07-03	3899.9	14	0	0	0	0	0	0	0	14	8
1	1980-07-29	250	150	78	118	100	9592.61	20	2	26	28957	1355	5692.71	145.971	1980-07-03	3899.9	20	0	0	0	0	0	0	0	20	8
1	1980-08-01	250	200	78	118	100	9592.61	20	3	29	28957	1356	5692.71	145.971	1980-07-03	3899.9	20	0	0	0	0	0	0	0	20	8
1	1980-07-03	180	150	79	63	63	3204.54	1	1	0	9677.79	1357	0	0	1980-07-03	3204.54	1	0	0	0	0	0	0	0	1	8
1	1980-07-07	200	160	79	77	77	4787.02	1	2	4	14453.7	1358	1582.49	49.3827	1980-07-03	3204.54	1	0	0	0	0	0	0	0	1	8
1	1980-07-11	180	160	79	77	77	4787.02	1	3	8	14453.7	1359	1582.49	49.3827	1980-07-03	3204.54	1	0	0	0	0	0	0	0	1	8
1	1980-07-03	180	150	80	35	35	989.054	10	1	0	2991.47	1360	0	0	1980-07-03	989.054	0	0	10	0	0	0	0	0	10	8
1	1980-07-07	200	160	80	35	35	989.054	10	3	4	2991.47	1361	0	0	1980-07-03	989.054	0	0	10	0	0	0	0	0	10	8
1	1980-07-03	180	150	81	71	62	3570.49	0	1	0	10782.2	1362	0	0	1980-07-03	3570.49	0	0	0	0	0	0	0	0	0	8
1	1980-07-07	200	160	81	75	73	4421.27	3	2	4	13349.9	1363	850.788	23.8284	1980-07-03	3570.49	3	0	0	0	0	0	0	0	3	8
1	1980-07-11	180	160	81	88	77	5495.31	3	2	8	16591.3	1364	1924.82	53.9092	1980-07-03	3570.49	3	0	0	0	0	0	0	0	3	8
1	1980-07-15	170	150	81	90	78	5696.95	3	2	12	17199.9	1365	2126.47	59.5568	1980-07-03	3570.49	3	0	0	0	0	0	0	0	3	8
1	1980-07-18	180	150	81	90	79	5764.98	5	2	15	17405.2	1366	2194.49	61.4619	1980-07-03	3570.49	5	0	0	0	0	0	0	0	5	8
1	1980-07-21	160	150	81	91	80	5902.23	8	2	18	17819.4	1367	2331.75	65.3061	1980-07-03	3570.49	8	0	0	0	0	0	0	0	8	8
1	1980-07-25	180	150	81	92	80	5971.47	12	2	22	18028.4	1368	2400.98	67.2452	1980-07-03	3570.49	12	0	0	0	0	0	0	0	12	8
1	1980-07-29	250	150	81	93	80	6041.1	15	2	26	18238.6	1369	2470.62	69.1955	1980-07-03	3570.49	15	0	0	0	0	0	0	0	15	8
1	1980-08-01	250	200	81	93	81	6111.14	29	2	29	18449.9	1370	2540.66	71.1572	1980-07-03	3570.49	25	0	0	0	0	0	1	3	25	8
1	1980-08-04	260	210	81	93	82	6181.59	32	2	32	18662.5	1371	2611.1	73.1302	1980-07-03	3570.49	25	0	0	0	0	0	2	5	25	8
1	1980-08-07	240	190	81	93	82	6181.59	80	2	35	18662.5	1372	2611.1	73.1302	1980-07-03	3570.49	25	0	0	0	0	0	40	15	25	8
1	1980-08-11	220	190	81	93	82	6181.59	100	2	39	18662.5	1373	2611.1	73.1302	1980-07-03	3570.49	25	0	0	0	0	0	0	75	25	8
1	1980-08-14	220	190	81	93	82	6181.59	100	3	42	18662.5	1374	2611.1	73.1302	1980-07-03	3570.49	25	0	0	0	0	0	0	75	25	8
1	1980-07-03	180	150	82	75	66	4012.94	1	1	0	12117.5	1375	0	0	1980-07-03	4012.94	1	0	0	0	0	0	0	0	1	8
1	1980-07-07	200	160	82	70	70	3956.22	5	2	4	11946.4	1376	-56.7192	-1.41341	1980-07-03	4012.94	5	0	0	0	0	0	0	0	5	8
1	1980-07-11	180	160	82	71	71	4070.06	5	2	8	12289.9	1377	57.1229	1.42347	1980-07-03	4012.94	5	0	0	0	0	0	0	0	5	8
1	1980-07-15	170	150	82	80	71	4602.33	5	2	12	13896.3	1378	589.396	14.6874	1980-07-03	4012.94	5	0	0	0	0	0	0	0	5	8
1	1980-07-18	180	150	82	81	71	4663.49	5	2	15	14080.9	1379	650.555	16.2115	1980-07-03	4012.94	5	0	0	0	0	0	0	0	5	8
1	1980-07-21	160	150	82	81	72	4725.06	13	2	18	14266.7	1380	712.119	17.7456	1980-07-03	4012.94	10	0	0	0	0	0	2	1	10	8
1	1980-07-25	180	150	82	82	72	4787.02	32	2	22	14453.7	1381	774.086	19.2898	1980-07-03	4012.94	10	0	0	0	0	0	15	7	10	8
1	1980-07-29	250	150	82	82	72	4787.02	32	3	26	14453.7	1382	774.086	19.2898	1980-07-03	4012.94	10	0	0	0	0	0	15	7	10	8
1	1980-07-07	200	160	83	93	82	6181.59	2	1	0	18662.5	1383	0	0	1980-07-07	6181.59	2	0	0	0	0	0	0	0	2	9
1	1980-07-11	180	160	83	95	83	6395.35	3	2	4	19307.7	1384	213.757	3.45796	1980-07-07	6181.59	3	0	0	0	0	0	0	0	3	9
1	1980-07-15	170	150	83	97	85	6686.01	5	2	8	20184.9	1385	504.418	8.16	1980-07-07	6181.59	5	0	0	0	0	0	0	0	5	9
1	1980-07-18	180	150	83	97	85	6686.01	5	2	11	20184.9	1386	504.418	8.16	1980-07-07	6181.59	5	0	0	0	0	0	0	0	5	9
1	1980-07-21	160	150	83	97	85	6686.01	8	2	14	20184.9	1387	504.418	8.16	1980-07-07	6181.59	8	0	0	0	0	0	0	0	8	9
1	1980-07-25	180	150	83	98	86	6833.76	11	2	18	20630.8	1388	652.17	10.5502	1980-07-07	6181.59	8	0	0	0	0	0	0	3	8	9
1	1980-07-29	250	150	83	98	87	6908.24	23	2	22	20855.6	1389	726.652	11.7551	1980-07-07	6181.59	8	0	0	0	0	0	10	5	8	9
1	1980-08-01	250	200	83	98	87	6908.24	38	2	25	20855.6	1390	726.652	11.7551	1980-07-07	6181.59	8	0	0	0	0	0	20	10	8	9
1	1980-08-04	260	210	83	98	87	6908.24	38	3	28	20855.6	1391	726.652	11.7551	1980-07-07	6181.59	8	0	0	0	0	0	20	10	8	9
1	1980-07-07	200	160	84	82	75	4975.35	1	1	0	15022.1	1392	0	0	1980-07-07	4975.35	1	0	0	0	0	0	0	0	1	9
1	1980-07-11	180	160	84	87	80	5629.33	10	2	4	16995.8	1393	653.987	13.1445	1980-07-07	4975.35	10	0	0	0	0	0	0	0	10	9
1	1980-07-15	170	150	84	92	85	6323.69	10	2	8	19091.4	1394	1348.34	27.1005	1980-07-07	4975.35	10	0	0	0	0	0	0	0	10	9
1	1980-07-18	180	150	84	92	86	6395.35	17	2	11	19307.7	1395	1420	28.5407	1980-07-07	4975.35	17	0	0	0	0	0	0	0	17	9
1	1980-07-21	160	150	84	95	88	6759.68	25	2	14	20407.2	1396	1784.33	35.8635	1980-07-07	4975.35	25	0	0	0	0	0	0	0	25	9
1	1980-07-25	180	150	84	95	88	6759.68	25	2	18	20407.2	1397	1784.33	35.8635	1980-07-07	4975.35	25	0	0	0	0	0	0	0	25	9
1	1980-07-29	250	150	84	95	88	6759.68	30	2	22	20407.2	1398	1784.33	35.8635	1980-07-07	4975.35	30	0	0	0	0	0	0	0	30	9
1	1980-08-01	250	200	84	95	88	6759.68	43	2	25	20407.2	1399	1784.33	35.8635	1980-07-07	4975.35	35	0	0	0	0	0	8	0	35	9
1	1980-08-04	260	210	84	95	88	6759.68	71	2	28	20407.2	1400	1784.33	35.8635	1980-07-07	4975.35	35	0	0	0	0	0	24	12	35	9
1	1980-08-07	240	190	84	95	88	6759.68	71	3	31	20407.2	1401	1784.33	35.8635	1980-07-07	4975.35	35	0	0	0	0	0	24	12	35	9
1	1980-07-07	200	160	85	68	59	3255.6	0	1	0	9831.92	1402	0	0	1980-07-07	3255.6	0	0	0	0	0	0	0	0	0	9
1	1980-07-11	180	160	85	83	75	5038.93	1	2	4	15214	1403	1783.33	54.7771	1980-07-07	3255.6	1	0	0	0	0	0	0	0	1	9
1	1980-07-15	170	150	85	87	77	5428.9	3	2	8	16390.9	1404	2173.3	66.7555	1980-07-07	3255.6	3	0	0	0	0	0	0	0	3	9
1	1980-07-18	180	150	85	88	78	5562.12	3	2	11	16793	1405	2306.51	70.8475	1980-07-07	3255.6	3	0	0	0	0	0	0	0	3	9
1	1980-07-21	160	150	85	90	81	5902.23	5	2	14	17819.4	1406	2646.63	81.2946	1980-07-07	3255.6	5	0	0	0	0	0	0	0	5	9
1	1980-07-25	180	150	85	91	82	6041.1	6	2	18	18238.6	1407	2785.5	85.5602	1980-07-07	3255.6	6	0	0	0	0	0	0	0	6	9
1	1980-07-29	250	150	85	92	82	6111.14	8	2	22	18449.9	1408	2855.54	87.7116	1980-07-07	3255.6	8	0	0	0	0	0	0	0	8	9
1	1980-08-01	250	200	85	92	83	6181.59	9	2	25	18662.5	1409	2925.99	89.8754	1980-07-07	3255.6	8	0	0	0	0	0	0	1	8	9
1	1980-08-04	260	210	85	92	83	6181.59	50	2	28	18662.5	1410	2925.99	89.8754	1980-07-07	3255.6	8	0	0	0	0	0	40	2	8	9
1	1980-08-07	240	190	85	92	83	6181.59	68	2	31	18662.5	1411	2925.99	89.8754	1980-07-07	3255.6	8	0	0	0	0	0	25	35	8	9
1	1980-08-11	220	190	85	92	83	6181.59	100	2	35	18662.5	1412	2925.99	89.8754	1980-07-07	3255.6	10	0	0	0	0	0	0	90	10	9
1	1980-08-14	220	190	85	92	83	6181.59	100	3	38	18662.5	1413	2925.99	89.8754	1980-07-07	3255.6	10	0	0	0	0	0	0	90	10	9
1	1980-07-07	200	160	86	40	41	1324.32	1	1	0	4003.31	1414	0	0	1980-07-07	1324.32	1	0	0	0	0	0	0	0	1	9
1	1980-07-11	180	160	86	48	49	1899.19	1	2	4	5738.25	1415	574.863	43.408	1980-07-07	1324.32	1	0	0	0	0	0	0	0	1	9
1	1980-07-15	170	150	86	51	52	2141.4	3	2	8	6469.26	1416	817.08	61.6979	1980-07-07	1324.32	3	0	0	0	0	0	0	0	3	9
1	1980-07-18	180	150	86	53	53	2267.96	4	2	11	6851.21	1417	943.638	71.2544	1980-07-07	1324.32	4	0	0	0	0	0	0	0	4	9
1	1980-07-21	160	150	86	54	56	2442.36	5	2	14	7377.54	1418	1118.03	84.4231	1980-07-07	1324.32	5	0	0	0	0	0	0	0	5	9
1	1980-07-25	180	150	86	54	56	2442.36	7	2	18	7377.54	1419	1118.03	84.4231	1980-07-07	1324.32	5	0	2	0	0	0	0	0	7	9
1	1980-07-29	250	150	86	54	56	2442.36	7	2	22	7377.54	1420	1118.03	84.4231	1980-07-07	1324.32	5	0	2	0	0	0	0	0	7	9
1	1980-08-01	250	200	86	54	56	2442.36	7	3	25	7377.54	1421	1118.03	84.4231	1980-07-07	1324.32	5	0	2	0	0	0	0	0	7	9
1	1980-07-07	200	160	87	97	86	6759.68	1	1	0	20407.2	1422	0	0	1980-07-07	6759.68	1	0	0	0	0	0	0	0	1	9
1	1980-07-11	180	160	87	101	90	7363.61	7	2	4	22229.9	1423	603.929	8.93428	1980-07-07	6759.68	7	0	0	0	0	0	0	0	7	9
1	1980-07-15	170	150	87	101	90	7363.61	7	2	8	22229.9	1424	603.929	8.93428	1980-07-07	6759.68	7	0	0	0	0	0	0	0	7	9
1	1980-07-18	180	150	87	102	92	7596.74	8	2	11	22933.5	1425	837.063	12.3832	1980-07-07	6759.68	8	0	0	0	0	0	0	0	8	9
1	1980-07-21	160	150	87	103	92	7675.26	10	2	14	23170.4	1426	915.582	13.5447	1980-07-07	6759.68	10	0	0	0	0	0	0	0	10	9
1	1980-07-25	180	150	87	103	93	7754.19	10	2	18	23408.6	1427	994.504	14.7123	1980-07-07	6759.68	10	0	0	0	0	0	0	0	10	9
1	1980-07-29	250	150	87	103	93	7754.19	12	2	22	23408.6	1428	994.504	14.7123	1980-07-07	6759.68	12	0	0	0	0	0	0	0	12	9
1	1980-08-01	250	200	87	105	94	7993.37	19	2	25	24130.5	1429	1233.69	18.2508	1980-07-07	6759.68	15	0	0	0	0	0	1	3	15	9
1	1980-08-04	260	210	87	105	96	8154.85	20	2	28	24617.9	1430	1395.17	20.6396	1980-07-07	6759.68	15	0	0	0	1	0	1	3	15	9
1	1980-08-07	240	190	87	105	96	8154.85	26	2	31	24617.9	1431	1395.17	20.6396	1980-07-07	6759.68	15	0	0	0	1	0	5	5	15	9
1	1980-08-11	220	190	87	105	96	8154.85	81	2	35	24617.9	1432	1395.17	20.6396	1980-07-07	6759.68	25	0	0	0	1	0	20	35	25	9
1	1980-08-14	220	190	87	105	96	8154.85	100	2	38	24617.9	1433	1395.17	20.6396	1980-07-07	6759.68	25	0	0	0	1	0	0	74	25	9
1	1980-08-18	220	190	87	105	96	8154.85	100	3	42	24617.9	1434	1395.17	20.6396	1980-07-07	6759.68	25	0	0	0	1	0	0	74	25	9
1	1980-07-07	200	160	88	69	62	3463.91	2	1	0	10460.6	1435	0	0	1980-07-07	3463.91	2	0	0	0	0	0	0	0	2	9
1	1980-07-11	180	160	88	78	72	4541.58	7	2	4	13713	1436	1077.67	31.1112	1980-07-07	3463.91	7	0	0	0	0	0	0	0	7	9
1	1980-07-15	170	150	88	83	78	5232.1	8	2	8	15797	1437	1768.19	51.046	1980-07-07	3463.91	8	0	0	0	0	0	0	0	8	9
1	1980-07-18	180	150	88	85	79	5428.9	15	2	11	16390.9	1438	1964.99	56.7275	1980-07-07	3463.91	15	0	0	0	0	0	0	0	15	9
1	1980-07-21	160	150	88	87	84	5902.23	20	2	14	17819.4	1439	2438.32	70.3922	1980-07-07	3463.91	20	0	0	0	0	0	0	0	20	9
1	1980-07-25	180	150	88	88	84	5971.47	20	2	18	18028.4	1440	2507.56	72.3909	1980-07-07	3463.91	20	0	0	0	0	0	0	0	20	9
1	1980-07-29	250	150	88	88	84	5971.47	20	2	22	18028.4	1441	2507.56	72.3909	1980-07-07	3463.91	20	0	0	0	0	0	0	0	20	9
1	1980-08-01	250	200	88	88	84	5971.47	25	2	25	18028.4	1442	2507.56	72.3909	1980-07-07	3463.91	25	0	0	0	0	0	0	0	25	9
1	1980-08-04	260	210	88	89	84	6041.1	30	2	28	18238.6	1443	2577.19	74.4013	1980-07-07	3463.91	25	0	0	0	0	0	5	0	25	9
1	1980-08-07	240	190	88	89	84	6041.1	34	2	31	18238.6	1444	2577.19	74.4013	1980-07-07	3463.91	25	0	0	0	0	0	3	6	25	10
1	1980-08-11	220	190	88	89	84	6041.1	40	2	35	18238.6	1445	2577.19	74.4013	1980-07-07	3463.91	25	0	0	0	0	0	5	10	25	10
1	1980-08-14	220	190	88	89	84	6041.1	65	2	38	18238.6	1446	2577.19	74.4013	1980-07-07	3463.91	25	0	0	0	0	0	25	15	25	10
1	1980-08-18	220	190	88	89	84	6041.1	65	3	42	18238.6	1447	2577.19	74.4013	1980-07-07	3463.91	25	0	0	0	0	0	25	15	25	10
1	1980-07-07	200	160	89	71	60	3463.91	3	1	0	10460.6	1448	0	0	1980-07-07	3463.91	0	0	3	0	0	0	0	0	3	10
1	1980-07-11	180	160	89	72	62	3624.38	7	2	4	10944.9	1449	160.469	4.6326	1980-07-07	3463.91	4	0	3	0	0	0	0	0	7	10
1	1980-07-15	170	150	89	72	62	3624.38	7	2	8	10944.9	1450	160.469	4.6326	1980-07-07	3463.91	4	0	3	0	0	0	0	0	7	10
1	1980-07-18	180	150	89	72	62	3624.38	7	3	11	10944.9	1451	160.469	4.6326	1980-07-07	3463.91	4	0	3	0	0	0	0	0	7	10
1	1980-07-11	180	160	90	68	62	3411.23	0	1	0	10301.6	1452	0	0	1980-07-11	3411.23	0	0	0	0	0	0	0	0	0	10
1	1980-07-15	170	150	90	84	78	5297.29	1	2	4	15993.7	1453	1886.07	55.2899	1980-07-11	3411.23	1	0	0	0	0	0	0	0	1	10
1	1980-07-18	180	150	90	88	83	5902.23	3	2	7	17819.4	1454	2491	73.0237	1980-07-11	3411.23	3	0	0	0	0	0	0	0	3	10
1	1980-07-21	160	150	90	90	85	6181.59	4	2	10	18662.5	1455	2770.36	81.213	1980-07-11	3411.23	4	0	0	0	0	0	0	0	4	10
1	1980-07-25	180	150	90	91	86	6323.69	5	2	14	19091.4	1456	2912.46	85.3787	1980-07-11	3411.23	5	0	0	0	0	0	0	0	5	10
1	1980-07-29	250	150	90	93	86	6467.41	5	2	18	19525.1	1457	3056.18	89.5917	1980-07-11	3411.23	5	0	0	0	0	0	0	0	5	10
1	1980-08-01	250	200	90	94	86	6539.87	15	2	21	19743.8	1458	3128.64	91.716	1980-07-11	3411.23	8	0	0	0	0	0	5	2	8	10
1	1980-08-04	260	210	90	94	92	6983.13	23	2	24	21081.6	1459	3571.9	104.71	1980-07-11	3411.23	8	0	0	0	0	0	5	10	8	10
1	1980-08-07	240	190	90	94	92	6983.13	70	2	27	21081.6	1460	3571.9	104.71	1980-07-11	3411.23	15	0	0	0	0	0	25	30	15	10
1	1980-08-11	220	190	90	94	92	6983.13	100	2	31	21081.6	1461	3571.9	104.71	1980-07-11	3411.23	15	0	0	0	0	0	0	85	15	10
1	1980-08-14	220	190	90	94	92	6983.13	100	3	34	21081.6	1462	3571.9	104.71	1980-07-11	3411.23	15	0	0	0	0	0	0	85	15	10
1	1980-07-11	180	160	91	75	70	4243.85	1	1	0	12814.4	1463	0	0	1980-07-11	4243.85	1	0	0	0	0	0	0	0	1	10
1	1980-07-15	170	150	91	93	81	6111.14	2	2	4	18449.9	1464	1867.29	44	1980-07-11	4243.85	1	0	0	0	0	0	0	1	1	10
1	1980-07-18	180	150	91	97	85	6686.01	3	2	7	20184.9	1465	2442.16	57.5458	1980-07-11	4243.85	1	0	0	0	0	0	0	2	1	10
1	1980-07-21	160	150	91	100	87	7058.42	6	2	10	21308.8	1466	2814.57	66.321	1980-07-11	4243.85	3	0	0	0	0	0	0	3	3	10
1	1980-07-25	180	150	91	100	89	7210.21	10	2	14	21766.9	1467	2966.36	69.8977	1980-07-11	4243.85	5	0	0	0	0	0	2	3	5	10
1	1980-07-29	250	150	91	104	89	7518.63	11	2	18	22697.7	1468	3274.78	77.1653	1980-07-11	4243.85	5	0	0	0	0	0	1	5	5	10
1	1980-08-01	250	200	91	104	90	7596.74	23	2	21	22933.5	1469	3352.89	79.0059	1980-07-11	4243.85	5	0	0	0	0	0	3	15	5	10
1	1980-08-04	260	210	91	104	90	7596.74	18	2	24	22933.5	1470	3352.89	79.0059	1980-07-11	4243.85	5	0	0	0	0	0	8	5	5	10
1	1980-08-07	240	190	91	104	90	7596.74	40	2	27	22933.5	1471	3352.89	79.0059	1980-07-11	4243.85	5	0	0	0	0	0	10	25	5	10
1	1980-08-11	220	190	91	104	90	7596.74	72	2	31	22933.5	1472	3352.89	79.0059	1980-07-11	4243.85	20	0	0	0	0	0	2	50	20	10
1	1980-08-14	220	190	91	104	90	7596.74	72	3	34	22933.5	1473	3352.89	79.0059	1980-07-11	4243.85	20	0	0	0	0	0	2	50	20	10
1	1980-07-11	180	160	92	45	48	1745.78	0	1	0	5275.27	1474	0	0	1980-07-11	1745.78	0	0	0	0	0	0	0	0	0	10
1	1980-07-15	170	150	92	51	53	2183.19	0	2	4	6595.36	1475	437.404	25.0549	1980-07-11	1745.78	0	0	0	0	0	0	0	0	0	10
1	1980-07-18	180	150	92	54	55	2398.15	3	2	7	7244.13	1476	652.372	37.3685	1980-07-11	1745.78	3	0	0	0	0	0	0	0	3	10
1	1980-07-21	160	150	92	54	56	2442.36	6	2	10	7377.54	1477	696.577	39.9006	1980-07-11	1745.78	6	0	0	0	0	0	0	0	6	10
1	1980-07-25	180	150	92	55	58	2577.39	6	2	14	7785.08	1478	831.613	47.6356	1980-07-11	1745.78	6	0	0	0	0	0	0	0	6	10
1	1980-07-29	250	150	92	56	58	2623.21	18	2	18	7923.37	1479	877.432	50.2601	1980-07-11	1745.78	8	0	0	0	0	0	10	0	8	10
1	1980-08-01	250	200	92	57	58	2669.44	44	2	21	8062.87	1480	923.656	52.9079	1980-07-11	1745.78	8	0	1	0	0	0	25	10	9	10
1	1980-08-04	260	210	92	57	58	2669.44	44	3	24	8062.87	1481	923.656	52.9079	1980-07-11	1745.78	8	0	1	0	0	0	25	10	9	10
1	1980-07-11	180	160	93	74	68	4070.06	2	1	0	12289.9	1482	0	0	1980-07-11	4070.06	2	0	0	0	0	0	0	0	2	10
1	1980-07-15	170	150	93	84	75	5102.91	3	2	4	15407.1	1483	1032.86	25.3769	1980-07-11	4070.06	3	0	0	0	0	0	0	0	3	10
1	1980-07-18	180	150	93	87	79	5562.12	5	2	7	16793	1484	1492.06	36.6594	1980-07-11	4070.06	5	0	0	0	0	0	0	0	5	10
1	1980-07-21	160	150	93	88	82	5833.4	20	2	10	17611.7	1485	1763.34	43.3247	1980-07-11	4070.06	20	0	0	0	0	0	0	0	20	10
1	1980-07-25	180	150	93	91	82	6041.1	30	2	14	18238.6	1486	1971.04	48.4279	1980-07-11	4070.06	30	0	0	0	0	0	0	0	30	10
1	1980-07-29	250	150	93	91	86	6323.69	40	2	18	19091.4	1487	2253.63	55.371	1980-07-11	4070.06	30	0	0	0	0	0	10	0	30	10
1	1980-08-01	250	200	93	91	86	6323.69	47	2	21	19091.4	1488	2253.63	55.371	1980-07-11	4070.06	30	0	0	0	0	0	10	7	30	10
1	1980-08-04	260	210	93	91	86	6323.69	47	3	24	19091.4	1489	2253.63	55.371	1980-07-11	4070.06	30	0	0	0	0	0	10	7	30	10
1	1980-07-11	180	160	94	52	46	1938.55	0	1	0	5857.04	1490	0	0	1980-07-11	1938.55	0	0	0	0	0	0	0	0	0	10
1	1980-07-15	170	150	94	74	64	3843.99	0	2	4	11607.7	1491	1905.44	98.2924	1980-07-11	1938.55	0	0	0	0	0	0	0	0	0	10
1	1980-07-18	180	150	94	79	69	4421.27	1	2	7	13349.9	1492	2482.73	128.072	1980-07-11	1938.55	1	0	0	0	0	0	0	0	1	10
1	1980-07-21	160	150	94	81	71	4663.49	7	2	10	14080.9	1493	2724.95	140.566	1980-07-11	1938.55	7	0	0	0	0	0	0	0	7	10
1	1980-07-25	180	150	94	82	72	4787.02	7	2	14	14453.7	1494	2848.48	146.939	1980-07-11	1938.55	7	0	0	0	0	0	0	0	7	10
1	1980-07-29	250	150	94	84	72	4912.17	8	2	18	14831.4	1495	2973.62	153.394	1980-07-11	1938.55	7	0	0	0	0	0	0	1	7	10
1	1980-08-01	250	200	94	84	76	5167.3	12	2	21	15601.4	1496	3228.76	166.556	1980-07-11	1938.55	10	0	0	0	0	0	0	2	10	10
1	1980-08-04	260	210	94	84	78	5297.29	12	2	24	15993.7	1497	3358.75	173.261	1980-07-11	1938.55	10	0	0	0	0	0	0	2	10	10
1	1980-08-07	240	190	94	84	78	5297.29	15	2	27	15993.7	1498	3358.75	173.261	1980-07-11	1938.55	11	0	0	0	0	0	4	0	11	10
1	1980-08-11	220	190	94	84	78	5297.29	98	2	31	15993.7	1499	3358.75	173.261	1980-07-11	1938.55	11	0	0	0	0	0	75	12	11	10
1	1980-08-14	220	190	94	84	78	5297.29	98	3	34	15993.7	1500	3358.75	173.261	1980-07-11	1938.55	11	0	0	0	0	0	75	12	11	10
1	1980-07-11	180	160	95	71	67	3843.99	0	1	0	11607.7	1501	0	0	1980-07-11	3843.99	0	0	0	0	0	0	0	0	0	10
1	1980-07-15	170	150	95	74	71	4243.85	2	2	4	12814.4	1502	399.86	10.4022	1980-07-11	3843.99	2	0	0	0	0	0	0	0	2	10
1	1980-07-18	180	150	95	76	73	4481.22	4	2	7	13530.8	1503	637.234	16.5774	1980-07-11	3843.99	4	0	0	0	0	0	0	0	4	10
1	1980-07-21	160	150	95	77	74	4602.33	7	2	10	13896.3	1504	758.342	19.728	1980-07-11	3843.99	7	0	0	0	0	0	0	0	7	10
1	1980-07-25	180	150	95	77	74	4602.33	8	2	14	13896.3	1505	758.342	19.728	1980-07-11	3843.99	8	0	0	0	0	0	0	0	8	11
1	1980-07-29	250	150	95	77	74	4602.33	35	2	18	13896.3	1506	758.342	19.728	1980-07-11	3843.99	35	0	0	0	0	0	0	0	35	11
1	1980-08-01	250	200	95	77	74	4602.33	43	2	21	13896.3	1507	758.342	19.728	1980-07-11	3843.99	40	0	0	0	0	0	2	1	40	11
1	1980-08-04	260	210	95	77	79	4912.17	40	2	24	14831.4	1508	1068.18	27.7883	1980-07-11	3843.99	40	0	0	0	0	0	0	0	40	11
1	1980-08-07	240	190	95	77	79	4912.17	40	3	27	14831.4	1509	1068.18	27.7883	1980-07-11	3843.99	40	0	0	0	0	0	0	0	40	11
1	1980-07-11	180	160	96	53	55	2354.35	1	1	0	7111.94	1510	0	0	1980-07-11	2354.35	0	0	1	0	0	0	0	0	1	11
1	1980-07-15	170	150	96	58	60	2810.53	4	2	4	8488.68	1511	456.176	19.3759	1980-07-11	2354.35	3	0	1	0	0	0	0	0	4	11
1	1980-07-18	180	150	96	64	62	3204.54	12	2	7	9677.79	1512	850.183	36.1111	1980-07-11	2354.35	11	0	1	0	0	0	0	0	12	11
1	1980-07-21	160	150	96	64	62	3204.54	31	2	10	9677.79	1513	850.183	36.1111	1980-07-11	2354.35	30	0	1	0	0	0	0	0	31	11
1	1980-07-25	180	150	96	64	62	3204.54	51	2	14	9677.79	1514	850.183	36.1111	1980-07-11	2354.35	40	0	1	0	0	0	10	0	41	11
1	1980-07-29	250	150	96	64	62	3204.54	51	3	18	9677.79	1515	850.183	36.1111	1980-07-11	2354.35	40	0	1	0	0	0	10	0	41	11
1	1980-07-11	180	160	97	86	82	5696.95	4	1	0	17199.9	1516	0	0	1980-07-11	5696.95	4	0	0	0	0	0	0	0	4	11
1	1980-07-15	170	150	97	93	89	6686.01	8	2	4	20184.9	1517	989.054	17.3611	1980-07-11	5696.95	8	0	0	0	0	0	0	0	8	11
1	1980-07-18	180	150	97	95	91	6983.13	8	2	7	21081.6	1518	1286.17	22.5765	1980-07-11	5696.95	8	0	0	0	0	0	0	0	8	11
1	1980-07-21	160	150	97	100	92	7440.92	8	2	10	22463.2	1519	1743.96	30.6122	1980-07-11	5696.95	8	0	0	0	0	0	0	0	8	11
1	1980-07-25	180	150	97	100	93	7518.63	12	2	14	22697.7	1520	1821.68	31.9763	1980-07-11	5696.95	12	0	0	0	0	0	0	0	12	11
1	1980-07-29	250	150	97	100	93	7518.63	12	2	18	22697.7	1521	1821.68	31.9763	1980-07-11	5696.95	12	0	0	0	0	0	0	0	12	11
1	1980-08-01	250	200	97	100	94	7596.74	29	2	21	22933.5	1522	1899.79	33.3475	1980-07-11	5696.95	25	0	0	0	0	0	1	3	25	11
1	1980-08-04	260	210	97	100	94	7596.74	38	2	24	22933.5	1523	1899.79	33.3475	1980-07-11	5696.95	30	0	0	0	0	0	5	3	30	11
1	1980-08-07	240	190	97	100	94	7596.74	45	2	27	22933.5	1524	1899.79	33.3475	1980-07-11	5696.95	35	0	0	0	0	0	5	5	35	11
1	1980-08-11	220	190	97	100	94	7596.74	50	2	31	22933.5	1525	1899.79	33.3475	1980-07-11	5696.95	35	0	0	0	0	0	5	10	35	11
1	1980-08-14	220	190	97	100	94	7596.74	80	2	34	22933.5	1526	1899.79	33.3475	1980-07-11	5696.95	40	0	0	0	0	0	30	10	40	11
1	1980-08-18	220	190	97	100	94	7596.74	100	2	38	22933.5	1527	1899.79	33.3475	1980-07-11	5696.95	40	0	0	0	0	0	0	60	40	11
1	1980-08-21	220	190	97	100	94	7596.74	100	2	41	22933.5	1528	1899.79	33.3475	1980-07-11	5696.95	40	0	0	0	0	0	0	60	40	11
1	1980-08-26	200	150	97	100	94	7596.74	100	3	46	22933.5	1529	1899.79	33.3475	1980-07-11	5696.95	40	0	0	0	0	0	0	60	40	11
1	1980-07-15	170	150	98	81	71	4663.49	0	1	0	14080.9	1530	0	0	1980-07-15	4663.49	0	0	0	0	0	0	0	0	0	11
1	1980-07-18	180	150	98	93	81	6111.14	0	2	3	18449.9	1531	1447.65	31.0422	1980-07-15	4663.49	0	0	0	0	0	0	0	0	0	11
1	1980-07-21	160	150	98	95	85	6539.87	3	2	6	19743.8	1532	1876.38	40.2355	1980-07-15	4663.49	3	0	0	0	0	0	0	0	3	11
1	1980-07-25	180	150	98	98	88	6983.13	4	2	10	21081.6	1533	2319.63	49.7403	1980-07-15	4663.49	4	0	0	0	0	0	0	0	4	11
1	1980-07-29	250	150	98	99	89	7134.11	4	2	14	21537.2	1534	2470.62	52.9778	1980-07-15	4663.49	4	0	0	0	0	0	0	0	4	11
1	1980-08-01	250	200	98	101	90	7363.61	8	2	17	22229.9	1535	2700.12	57.8991	1980-07-15	4663.49	8	0	0	0	0	0	0	0	8	11
1	1980-08-04	260	210	98	101	90	7363.61	8	2	20	22229.9	1536	2700.12	57.8991	1980-07-15	4663.49	8	0	0	0	0	0	0	0	8	11
1	1980-08-07	240	190	98	102	90	7440.92	13	2	23	22463.2	1537	2777.43	59.5568	1980-07-15	4663.49	8	0	0	0	0	0	0	5	8	11
1	1980-08-11	220	190	98	102	90	7440.92	33	2	27	22463.2	1538	2777.43	59.5568	1980-07-15	4663.49	8	0	0	0	0	0	15	10	8	11
1	1980-08-14	220	190	98	102	90	7440.92	96	2	30	22463.2	1539	2777.43	59.5568	1980-07-15	4663.49	8	0	0	0	0	0	25	63	8	11
1	1980-08-18	220	190	98	102	90	7440.92	96	2	34	22463.2	1540	2777.43	59.5568	1980-07-15	4663.49	8	0	0	0	0	0	0	88	8	11
1	1980-08-21	220	190	98	102	90	7440.92	96	3	37	22463.2	1541	2777.43	59.5568	1980-07-15	4663.49	8	0	0	0	0	0	0	88	8	11
1	1980-07-15	170	150	99	57	51	2354.35	0	1	0	7111.94	1542	0	0	1980-07-15	2354.35	0	0	0	0	0	0	0	0	0	11
1	1980-07-18	180	150	99	68	64	3517	0	2	3	10620.8	1543	1162.64	49.3827	1980-07-15	2354.35	0	0	0	0	0	0	0	0	0	11
1	1980-07-21	160	150	99	73	68	4012.94	3	2	6	12117.5	1544	1658.58	70.4475	1980-07-15	2354.35	3	0	0	0	0	0	0	0	3	11
1	1980-07-25	180	150	99	75	70	4243.85	4	2	10	12814.4	1545	1889.5	80.2555	1980-07-15	2354.35	4	0	0	0	0	0	0	0	4	11
1	1980-07-29	250	150	99	76	72	4421.27	20	2	14	13349.9	1546	2066.92	87.7915	1980-07-15	2354.35	20	0	0	0	0	0	0	0	20	11
1	1980-08-01	250	200	99	77	73	4541.58	20	2	17	13713	1547	2187.22	92.9012	1980-07-15	2354.35	20	0	0	0	0	0	0	0	20	11
1	1980-08-04	260	210	99	77	74	4602.33	25	2	20	13896.3	1548	2247.98	95.4818	1980-07-15	2354.35	25	0	0	0	0	0	0	0	25	11
1	1980-08-07	240	190	99	77	74	4602.33	35	2	23	13896.3	1549	2247.98	95.4818	1980-07-15	2354.35	25	0	0	0	0	0	10	0	25	11
1	1980-08-11	220	190	99	77	74	4602.33	100	2	27	13896.3	1550	2247.98	95.4818	1980-07-15	2354.35	25	0	0	0	0	0	25	50	25	11
1	1980-08-14	220	190	99	77	74	4602.33	100	2	30	13896.3	1551	2247.98	95.4818	1980-07-15	2354.35	25	0	0	0	0	0	0	75	25	11
1	1980-08-18	220	190	99	77	74	4602.33	100	3	34	13896.3	1552	2247.98	95.4818	1980-07-15	2354.35	25	0	0	0	0	0	0	75	25	11
1	1980-07-15	170	150	100	72	60	3517	0	1	0	10620.8	1553	0	0	1980-07-15	3517	0	0	0	0	0	0	0	0	0	11
1	1980-07-18	180	150	100	80	69	4481.22	0	2	3	13530.8	1554	964.227	27.4162	1980-07-15	3517	0	0	0	0	0	0	0	0	0	11
1	1980-07-21	160	150	100	83	72	4849.39	0	2	6	14642	1555	1332.4	37.8845	1980-07-15	3517	0	0	0	0	0	0	0	0	0	11
1	1980-07-25	180	150	100	83	73	4912.17	0	2	10	14831.4	1556	1395.17	39.6694	1980-07-15	3517	0	0	0	0	0	0	0	0	0	11
1	1980-07-29	250	150	100	83	73	4912.17	0	3	14	14831.4	1557	1395.17	39.6694	1980-07-15	3517	0	0	0	0	0	0	0	0	0	11
1	1980-07-15	170	150	101	56	56	2531.98	1	1	0	7648.02	1558	0	0	1980-07-15	2531.98	1	0	0	0	0	0	0	0	1	11
1	1980-07-18	180	150	101	61	61	3004.3	1	2	3	9073.49	1559	472.324	18.6543	1980-07-15	2531.98	1	0	0	0	0	0	0	0	1	11
1	1980-07-21	160	150	101	65	65	3411.23	1	2	6	10301.6	1560	879.249	34.7258	1980-07-15	2531.98	1	0	0	0	0	0	0	0	1	11
1	1980-07-25	180	150	101	66	66	3517	2	2	10	10620.8	1561	985.017	38.9031	1980-07-15	2531.98	2	0	0	0	0	0	0	0	2	11
1	1980-07-29	250	150	101	67	66	3570.49	79	2	14	10782.2	1562	1038.51	41.0156	1980-07-15	2531.98	3	0	0	75	1	0	0	0	78	11
1	1980-08-01	250	200	101	68	67	3678.68	79	2	17	11108.8	1563	1146.7	45.2886	1980-07-15	2531.98	3	0	0	75	1	0	0	0	78	11
1	1980-08-04	260	210	101	69	67	3733.38	79	2	20	11273.8	1564	1201.4	47.449	1980-07-15	2531.98	3	0	0	75	1	0	0	0	78	11
1	1980-08-07	240	190	101	70	67	3788.48	81	2	23	11440.1	1565	1256.5	49.6253	1980-07-15	2531.98	3	0	0	75	1	0	2	0	78	11
1	1980-08-11	220	190	101	70	67	3788.48	83	2	27	11440.1	1566	1256.5	49.6253	1980-07-15	2531.98	3	0	0	75	1	0	3	1	78	12
1	1980-08-14	220	190	101	70	67	3788.48	88	2	30	11440.1	1567	1256.5	49.6253	1980-07-15	2531.98	3	0	0	75	1	0	5	4	78	12
1	1980-08-18	220	190	101	70	67	3788.48	88	3	34	11440.1	1568	1256.5	49.6253	1980-07-15	2531.98	3	0	0	75	1	0	5	4	78	12
1	1980-07-15	170	150	102	91	57	4421.27	1	1	0	13349.9	1569	0	0	1980-07-15	4421.27	1	0	0	0	0	0	0	0	1	12
1	1980-07-18	180	150	102	97	81	6395.35	3	2	3	19307.7	1570	1974.07	44.6494	1980-07-15	4421.27	3	0	0	0	0	0	0	0	3	12
1	1980-07-21	160	150	102	101	84	6908.24	5	2	6	20855.6	1571	2486.97	56.25	1980-07-15	4421.27	5	0	0	0	0	0	0	0	5	12
1	1980-07-25	180	150	102	101	84	6908.24	7	2	10	20855.6	1572	2486.97	56.25	1980-07-15	4421.27	7	0	0	0	0	0	0	0	7	12
1	1980-07-29	250	150	102	103	86	7210.21	8	2	14	21766.9	1573	2788.93	63.0798	1980-07-15	4421.27	8	0	0	0	0	0	0	0	8	12
1	1980-08-01	250	200	102	104	88	7440.92	10	2	17	22463.2	1574	3019.64	68.298	1980-07-15	4421.27	8	0	0	0	0	0	0	2	8	12
1	1980-08-04	260	210	102	104	88	7440.92	10	3	20	22463.2	1575	3019.64	68.298	1980-07-15	4421.27	8	0	0	0	0	0	0	2	8	12
1	1980-07-18	180	150	103	63	62	3153.87	0	1	0	9524.89	1576	0	0	1980-07-18	3153.87	0	0	0	0	0	0	0	0	0	12
1	1980-07-21	160	150	103	72	70	4070.06	3	2	3	12289.9	1577	916.187	29.0496	1980-07-18	3153.87	3	0	0	0	0	0	0	0	3	12
1	1980-07-25	180	150	103	74	73	4361.73	4	2	7	13170.2	1578	1207.86	38.2976	1980-07-18	3153.87	4	0	0	0	0	0	0	0	4	12
1	1980-07-29	250	150	103	77	76	4725.06	5	2	11	14266.7	1579	1571.18	49.8176	1980-07-18	3153.87	5	0	0	0	0	0	0	0	5	12
1	1980-08-01	250	200	103	79	77	4912.17	5	2	14	14831.4	1580	1758.3	55.7504	1980-07-18	3153.87	5	0	0	0	0	0	0	0	5	12
1	1980-08-04	260	210	103	80	78	5038.93	10	2	17	15214	1581	1885.06	59.7696	1980-07-18	3153.87	8	0	0	0	0	0	2	0	8	12
1	1980-08-07	240	190	103	80	78	5038.93	22	2	20	15214	1582	1885.06	59.7696	1980-07-18	3153.87	12	0	0	0	0	0	6	4	12	12
1	1980-08-11	220	190	103	80	78	5038.93	25	2	24	15214	1583	1885.06	59.7696	1980-07-18	3153.87	12	0	0	0	0	0	3	10	12	12
1	1980-08-14	220	190	103	81	78	5102.91	60	2	27	15407.1	1584	1949.04	61.7984	1980-07-18	3153.87	15	0	0	0	0	0	25	20	15	12
1	1980-08-18	220	190	103	81	78	5102.91	100	2	31	15407.1	1585	1949.04	61.7984	1980-07-18	3153.87	15	0	0	0	0	0	0	85	15	12
1	1980-08-21	220	190	103	81	78	5102.91	100	3	34	15407.1	1586	1949.04	61.7984	1980-07-18	3153.87	15	0	0	0	0	0	0	85	15	12
1	1980-07-18	180	150	104	68	67	3678.68	0	1	0	11108.8	1587	0	0	1980-07-18	3678.68	0	0	0	0	0	0	0	0	0	12
1	1980-07-21	160	150	104	79	78	4975.35	1	2	3	15022.1	1588	1296.67	35.2483	1980-07-18	3678.68	1	0	0	0	0	0	0	0	1	12
1	1980-07-25	180	150	104	83	83	5562.12	1	2	7	16793	1589	1883.44	51.1989	1980-07-18	3678.68	1	0	0	0	0	0	0	0	1	12
1	1980-07-29	250	150	104	86	85	5902.23	1	2	11	17819.4	1590	2223.56	60.4444	1980-07-18	3678.68	1	0	0	0	0	0	0	0	1	12
1	1980-08-01	250	200	104	88	88	6252.44	1	2	14	18876.4	1591	2573.76	69.9643	1980-07-18	3678.68	1	0	0	0	0	0	0	0	1	12
1	1980-08-04	260	210	104	88	88	6252.44	72	2	17	18876.4	1592	2573.76	69.9643	1980-07-18	3678.68	1	0	0	70	1	0	0	0	71	12
1	1980-08-07	240	190	104	88	88	6252.44	73	2	20	18876.4	1593	2573.76	69.9643	1980-07-18	3678.68	2	0	0	70	1	0	0	0	72	12
1	1980-08-11	220	190	104	88	88	6252.44	84	2	24	18876.4	1594	2573.76	69.9643	1980-07-18	3678.68	2	0	0	70	1	0	5	6	72	12
1	1980-08-14	220	190	104	88	88	6252.44	100	2	27	18876.4	1595	2573.76	69.9643	1980-07-18	3678.68	2	0	0	70	1	0	5	22	72	12
1	1980-08-18	220	190	104	88	88	6252.44	100	3	31	18876.4	1596	2573.76	69.9643	1980-07-18	3678.68	2	0	0	70	1	0	5	22	72	12
1	1980-07-18	180	150	105	76	66	4070.06	0	1	0	12289.9	1597	0	0	1980-07-18	4070.06	0	0	0	0	0	0	0	0	0	12
1	1980-07-21	160	150	105	91	81	5971.47	0	2	3	18028.4	1598	1901.41	46.7169	1980-07-18	4070.06	0	0	0	0	0	0	0	0	0	12
1	1980-07-25	180	150	105	101	90	7363.61	0	2	7	22229.9	1599	3293.55	80.9214	1980-07-18	4070.06	0	0	0	0	0	0	0	0	0	12
1	1980-07-29	250	150	105	104	93	7833.51	1	2	11	23648	1600	3763.45	92.4668	1980-07-18	4070.06	0	0	0	0	1	0	0	0	0	12
1	1980-08-01	250	200	105	105	93	7913.24	2	2	14	23888.7	1601	3843.18	94.4257	1980-07-18	4070.06	1	0	0	0	1	0	0	0	1	12
1	1980-08-04	260	210	105	105	94	7993.37	3	2	17	24130.5	1602	3923.32	96.3946	1980-07-18	4070.06	2	0	0	0	1	0	0	0	2	12
1	1980-08-07	240	190	105	106	95	8154.85	6	2	20	24617.9	1603	4084.79	100.362	1980-07-18	4070.06	5	0	0	0	1	0	0	0	5	12
1	1980-08-11	220	190	105	106	95	8154.85	46	2	24	24617.9	1604	4084.79	100.362	1980-07-18	4070.06	5	0	0	40	1	0	0	0	45	12
1	1980-08-14	220	190	105	106	95	8154.85	60	2	27	24617.9	1605	4084.79	100.362	1980-07-18	4070.06	5	0	10	40	1	0	4	0	55	12
1	1980-08-18	220	190	105	106	95	8154.85	64	2	31	24617.9	1606	4084.79	100.362	1980-07-18	4070.06	5	0	10	40	1	0	5	3	55	12
1	1980-08-21	220	190	105	106	95	8154.85	64	3	34	24617.9	1607	4084.79	100.362	1980-07-18	4070.06	5	0	10	40	1	0	5	3	55	12
1	1980-07-18	180	150	106	79	71	4541.58	4	1	0	13713	1608	0	0	1980-07-18	4541.58	4	0	0	0	0	0	0	0	4	12
1	1980-07-21	160	150	106	81	74	4849.39	4	2	3	14642	1609	307.818	6.77778	1980-07-18	4541.58	4	0	0	0	0	0	0	0	4	12
1	1980-07-25	180	150	106	81	75	4912.17	6	2	7	14831.4	1610	370.593	8.16	1980-07-18	4541.58	6	0	0	0	0	0	0	0	6	12
1	1980-07-29	250	150	106	83	76	5102.91	8	2	11	15407.1	1611	561.339	12.36	1980-07-18	4541.58	8	0	0	0	0	0	0	0	8	12
1	1980-08-01	250	200	106	85	78	5362.89	8	2	14	16191.7	1612	821.319	18.0844	1980-07-18	4541.58	8	0	0	0	0	0	0	0	8	12
1	1980-08-04	260	210	106	85	80	5495.31	8	2	17	16591.3	1613	953.731	21	1980-07-18	4541.58	8	0	0	0	0	0	0	0	8	12
1	1980-08-07	240	190	106	85	80	5495.31	30	2	20	16591.3	1614	953.731	21	1980-07-18	4541.58	30	0	0	0	0	0	0	0	30	12
1	1980-08-11	220	190	106	85	80	5495.31	30	3	24	16591.3	1615	953.731	21	1980-07-18	4541.58	30	0	0	0	0	0	0	0	30	12
1	1980-07-21	160	150	107	65	63	3307.07	0	1	0	9987.26	1616	0	0	1980-07-21	3307.07	0	0	0	0	0	0	0	0	0	12
1	1980-07-25	180	150	107	74	70	4185.52	0	2	4	12638.4	1617	878.442	26.5625	1980-07-21	3307.07	0	0	0	0	0	0	0	0	0	12
1	1980-07-29	250	150	107	75	74	4481.22	0	2	8	13530.8	1618	1174.15	35.5042	1980-07-21	3307.07	0	0	0	0	0	0	0	0	0	12
1	1980-08-01	250	200	107	78	74	4663.49	1	2	11	14080.9	1619	1356.42	41.0156	1980-07-21	3307.07	1	0	0	0	0	0	0	0	1	12
1	1980-08-04	260	210	107	78	75	4725.06	2	2	14	14266.7	1620	1417.98	42.8772	1980-07-21	3307.07	2	0	0	0	0	0	0	0	2	12
1	1980-08-07	240	190	107	78	75	4725.06	19	2	17	14266.7	1621	1417.98	42.8772	1980-07-21	3307.07	4	0	0	0	0	0	15	0	4	12
1	1980-08-11	220	190	107	78	75	4725.06	57	2	21	14266.7	1622	1417.98	42.8772	1980-07-21	3307.07	5	0	0	0	0	0	20	32	5	12
1	1980-08-14	220	190	107	79	75	4787.02	57	3	24	14453.7	1623	1479.95	44.751	1980-07-21	3307.07	5	0	0	0	0	0	20	32	5	12
1	1980-07-21	160	150	108	81	69	4541.58	0	1	0	13713	1624	0	0	1980-07-21	4541.58	0	0	0	0	0	0	0	0	0	12
1	1980-07-25	180	150	108	90	79	5764.98	4	2	4	17405.2	1625	1223.4	26.9378	1980-07-21	4541.58	4	0	0	0	0	0	0	0	4	12
1	1980-07-29	250	150	108	97	85	6686.01	4	2	8	20184.9	1626	2144.43	47.2178	1980-07-21	4541.58	4	0	0	0	0	0	0	0	4	12
1	1980-08-01	250	200	108	100	87	7058.42	6	2	11	21308.8	1627	2516.84	55.4178	1980-07-21	4541.58	4	2	0	0	0	0	0	0	6	13
1	1980-08-04	260	210	108	101	88	7210.21	7	2	14	21766.9	1628	2668.63	58.76	1980-07-21	4541.58	4	3	0	0	0	0	0	0	7	13
1	1980-08-07	240	190	108	101	89	7286.71	7	2	17	21997.8	1629	2745.13	60.4444	1980-07-21	4541.58	4	3	0	0	0	0	0	0	7	13
1	1980-08-11	220	190	108	101	89	7286.71	7	2	21	21997.8	1630	2745.13	60.4444	1980-07-21	4541.58	4	3	0	0	0	0	0	0	7	13
1	1980-08-14	220	190	108	102	90	7440.92	7	2	24	22463.2	1631	2899.34	63.84	1980-07-21	4541.58	4	3	0	0	0	0	0	0	7	13
1	1980-08-18	220	190	108	102	90	7440.92	7	2	28	22463.2	1632	2899.34	63.84	1980-07-21	4541.58	4	3	0	0	0	0	0	0	7	13
1	1980-08-21	220	190	108	102	90	7440.92	10	2	31	22463.2	1633	2899.34	63.84	1980-07-21	4541.58	4	3	0	0	1	0	0	2	7	13
1	1980-08-26	200	150	108	103	90	7518.63	12	2	36	22697.7	1634	2977.05	65.5511	1980-07-21	4541.58	4	3	0	0	1	0	2	2	7	13
1	1980-08-29	220	160	108	103	90	7518.63	33	2	39	22697.7	1635	2977.05	65.5511	1980-07-21	4541.58	5	3	0	0	1	0	20	4	8	13
1	1980-09-02	200	160	108	103	90	7518.63	33	3	43	22697.7	1636	2977.05	65.5511	1980-07-21	4541.58	5	3	0	0	1	0	20	4	8	13
1	1980-07-21	160	150	109	71	61	3517	0	1	0	10620.8	1637	0	0	1980-07-21	3517	0	0	0	0	0	0	0	0	0	13
1	1980-07-25	180	150	109	83	72	4849.39	3	2	4	14642	1638	1332.4	37.8845	1980-07-21	3517	3	0	0	0	0	0	0	0	3	13
1	1980-07-29	250	150	109	86	77	5362.89	3	2	8	16191.7	1639	1845.9	52.4851	1980-07-21	3517	3	0	0	0	0	0	0	0	3	13
1	1980-08-01	250	200	109	88	77	5495.31	5	2	11	16591.3	1640	1978.31	56.25	1980-07-21	3517	4	0	0	0	1	0	0	0	4	13
1	1980-08-04	260	210	109	88	79	5629.33	6	2	14	16995.8	1641	2112.34	60.0608	1980-07-21	3517	5	0	0	0	1	0	0	0	5	13
1	1980-08-07	240	190	109	88	79	5629.33	8	2	17	16995.8	1642	2112.34	60.0608	1980-07-21	3517	6	0	0	0	1	0	0	1	6	13
1	1980-08-11	220	190	109	89	80	5764.98	8	2	21	17405.2	1643	2247.98	63.9176	1980-07-21	3517	6	0	0	0	1	0	0	1	6	13
1	1980-08-14	220	190	109	89	80	5764.98	10	2	24	17405.2	1644	2247.98	63.9176	1980-07-21	3517	6	0	0	0	1	0	0	3	6	13
1	1980-08-18	220	190	109	89	80	5764.98	15	2	28	17405.2	1645	2247.98	63.9176	1980-07-21	3517	6	0	0	0	1	0	5	3	6	13
1	1980-08-21	220	190	109	90	80	5833.4	17	2	31	17611.7	1646	2316.41	65.8632	1980-07-21	3517	6	0	0	0	1	0	0	10	6	13
1	1980-08-26	200	150	109	90	80	5833.4	82	2	36	17611.7	1647	2316.41	65.8632	1980-07-21	3517	6	0	0	0	1	0	25	50	6	13
1	1980-08-29	220	160	109	90	80	5833.4	82	2	39	17611.7	1648	2316.41	65.8632	1980-07-21	3517	6	0	0	0	1	0	0	75	6	13
1	1980-09-02	200	160	109	90	80	5833.4	82	3	43	17611.7	1649	2316.41	65.8632	1980-07-21	3517	6	0	0	0	1	0	0	75	6	13
1	1980-07-21	160	150	110	64	59	3053.76	1	1	0	9222.74	1650	0	0	1980-07-21	3053.76	1	0	0	0	0	0	0	0	1	13
1	1980-07-25	180	150	110	76	73	4481.22	3	2	4	13530.8	1651	1427.47	46.7447	1980-07-21	3053.76	3	0	0	0	0	0	0	0	3	13
1	1980-07-29	250	150	110	82	80	5297.29	3	2	8	15993.7	1652	2243.54	73.4682	1980-07-21	3053.76	3	0	0	0	0	0	0	0	3	13
1	1980-08-01	250	200	110	82	80	5297.29	3	3	11	15993.7	1653	2243.54	73.4682	1980-07-21	3053.76	3	0	0	0	0	0	0	0	3	13
1	1980-07-25	180	150	111	73	70	4361.73	0	1	0	13170.2	1654	0	0	1980-07-25	4361.73	0	0	0	0	0	0	0	0	0	13
1	1980-07-29	250	150	111	77	74	4663.49	2	2	4	14080.9	1655	301.762	6.91841	1980-07-25	4361.73	2	0	0	0	0	0	0	0	2	13
1	1980-08-01	250	200	111	78	77	4849.39	2	2	7	14642	1656	487.664	11.1805	1980-07-25	4361.73	2	0	0	0	0	0	0	0	2	13
1	1980-08-04	260	210	111	78	77	4975.35	3	2	10	15022.1	1657	613.617	14.0682	1980-07-25	4361.73	3	0	0	0	0	0	0	0	3	13
1	1980-08-07	240	190	111	80	79	5102.91	8	2	13	15407.1	1658	741.185	16.9929	1980-07-25	4361.73	8	0	0	0	0	0	0	0	8	13
1	1980-08-11	220	190	111	80	80	5232.1	10	2	17	15797	1659	870.368	19.9546	1980-07-25	4361.73	8	0	0	0	0	0	2	0	8	13
1	1980-08-14	220	190	111	81	80	5232.1	16	2	20	15797	1660	870.368	19.9546	1980-07-25	4361.73	8	0	0	0	0	0	5	3	8	13
1	1980-08-18	220	190	111	81	80	5232.1	43	2	24	15797	1661	870.368	19.9546	1980-07-25	4361.73	8	0	0	0	0	0	10	25	8	13
1	1980-08-21	220	190	111	81	80	5232.1	100	2	27	15797	1662	870.368	19.9546	1980-07-25	4361.73	8	0	0	0	0	0	50	42	8	13
1	1980-08-26	200	150	111	81	80	4421.27	100	3	32	13349.9	1663	59.5451	1.36517	1980-07-25	4361.73	8	0	0	0	0	0	50	42	8	13
1	1980-07-25	180	150	112	68	62	3843.99	2	1	0	11607.7	1664	0	0	1980-07-25	3843.99	1	0	1	0	0	0	0	0	2	13
1	1980-07-29	250	150	112	76	70	4421.27	2	2	4	13349.9	1665	577.285	15.0179	1980-07-25	3843.99	1	0	1	0	0	0	0	0	2	13
1	1980-08-01	250	200	112	78	73	4725.06	2	2	7	14266.7	1666	881.066	22.9206	1980-07-25	3843.99	1	1	0	0	0	0	0	0	2	13
1	1980-08-04	260	210	112	80	73	4725.06	2	2	10	14266.7	1667	881.066	22.9206	1980-07-25	3843.99	1	1	0	0	0	0	0	0	2	13
1	1980-08-07	240	190	112	80	73	4725.06	6	2	13	14266.7	1668	881.066	22.9206	1980-07-25	3843.99	3	1	2	0	0	0	0	0	6	13
1	1980-08-11	220	190	112	80	74	4787.02	6	2	17	14453.7	1669	943.033	24.5327	1980-07-25	3843.99	3	1	2	0	0	0	0	0	6	13
1	1980-08-14	220	190	112	80	74	4787.02	6	2	20	14453.7	1670	943.033	24.5327	1980-07-25	3843.99	3	1	2	0	0	0	0	0	6	13
1	1980-08-18	220	190	112	80	74	4787.02	8	2	24	14453.7	1671	943.033	24.5327	1980-07-25	3843.99	3	1	2	0	0	0	1	1	6	13
1	1980-08-21	220	190	112	80	76	4912.17	8	2	27	14831.4	1672	1068.18	27.7883	1980-07-25	3843.99	3	1	2	0	0	0	0	2	6	13
1	1980-08-26	200	150	112	80	76	2906.61	8	3	32	8778.65	1673	-937.381	-24.3856	1980-07-25	3843.99	3	1	2	0	0	0	0	2	6	13
1	1980-07-25	180	150	113	44	43	1821.68	9	1	0	5504.33	1674	0	0	1980-07-25	1821.68	5	0	4	0	0	0	0	0	9	13
1	1980-07-29	250	150	113	52	50	2100.02	9	2	4	6344.38	1675	278.348	15.2798	1980-07-25	1821.68	5	0	4	0	0	0	0	0	9	13
1	1980-08-01	250	200	113	52	50	2100.02	9	2	7	6344.38	1676	278.348	15.2798	1980-07-25	1821.68	5	0	4	0	0	0	0	0	9	13
1	1980-08-04	260	210	113	52	50	2100.02	12	2	10	6344.38	1677	278.348	15.2798	1980-07-25	1821.68	8	0	4	0	0	0	0	0	12	13
1	1980-08-07	240	190	113	52	50	2100.02	27	2	13	6344.38	1678	278.348	15.2798	1980-07-25	1821.68	12	0	4	0	0	0	10	1	16	13
1	1980-08-11	220	190	113	52	50	2100.02	100	2	17	6344.38	1679	278.348	15.2798	1980-07-25	1821.68	12	0	4	0	0	0	0	84	16	13
1	1980-08-14	220	190	113	52	50	2100.02	100	3	20	6344.38	1680	278.348	15.2798	1980-07-25	1821.68	12	0	4	0	0	0	0	84	16	13
1	1980-07-25	180	150	114	66	63	3358.95	0	1	0	10143.8	1681	0	0	1980-07-25	3358.95	0	0	0	0	0	0	0	0	0	13
1	1980-07-29	250	150	114	75	73	4421.27	2	2	4	13349.9	1682	1062.32	31.6267	1980-07-25	3358.95	2	0	0	0	0	0	0	0	2	13
1	1980-08-01	250	200	114	77	75	4663.49	3	2	7	14080.9	1683	1304.54	38.8378	1980-07-25	3358.95	3	0	0	0	0	0	0	0	3	13
1	1980-08-04	260	210	114	78	76	4787.02	5	2	10	14453.7	1684	1428.07	42.5155	1980-07-25	3358.95	4	0	0	0	1	0	0	0	4	13
1	1980-08-07	240	190	114	80	77	4975.35	6	2	13	15022.1	1685	1616.4	48.1221	1980-07-25	3358.95	5	0	0	0	1	0	0	0	5	13
1	1980-08-11	220	190	114	80	77	4975.35	6	2	17	15022.1	1686	1616.4	48.1221	1980-07-25	3358.95	5	0	0	0	1	0	0	0	5	13
1	1980-08-14	220	190	114	80	77	4975.35	6	2	20	15022.1	1687	1616.4	48.1221	1980-07-25	3358.95	5	0	0	0	1	0	0	0	5	13
1	1980-08-18	220	190	114	80	77	4975.35	6	2	24	15022.1	1688	1616.4	48.1221	1980-07-25	3358.95	5	0	0	0	1	0	0	0	5	14
1	1980-08-21	220	190	114	80	77	4975.35	6	2	27	15022.1	1689	1616.4	48.1221	1980-07-25	3358.95	5	0	0	0	1	0	0	0	5	14
1	1980-08-26	200	150	114	80	77	4975.35	6	3	32	15022.1	1690	1616.4	48.1221	1980-07-25	3358.95	5	0	0	0	1	0	0	0	5	14
1	1980-07-25	180	150	115	84	78	5297.29	0	1	0	15993.7	1691	0	0	1980-07-25	5297.29	0	0	0	0	0	0	0	0	0	14
1	1980-07-29	250	150	115	91	85	6252.44	0	2	4	18876.4	1692	955.144	18.0308	1980-07-25	5297.29	0	0	0	0	0	0	0	0	0	14
1	1980-08-01	250	200	115	91	85	6252.44	0	3	7	18876.4	1693	955.144	18.0308	1980-07-25	5297.29	0	0	0	0	0	0	0	0	0	14
1	1980-07-25	180	150	116	92	81	6041.1	1	1	0	18238.6	1694	0	0	1980-07-25	6041.1	1	0	0	0	0	0	0	0	1	14
1	1980-07-29	250	150	116	109	93	8236.2	1	2	4	24863.4	1695	2195.09	36.336	1980-07-25	6041.1	1	0	0	0	0	0	0	0	1	14
1	1980-08-01	250	200	116	110	96	8565.61	3	2	7	25857.5	1696	2524.51	41.7889	1980-07-25	6041.1	3	0	0	0	0	0	0	0	3	14
1	1980-08-04	260	210	116	110	97	8648.98	3	2	10	26109.1	1697	2607.87	43.1688	1980-07-25	6041.1	3	0	0	0	0	0	0	0	3	14
1	1980-08-07	240	190	116	110	97	8648.98	5	2	13	26109.1	1698	2607.87	43.1688	1980-07-25	6041.1	5	0	0	0	0	0	0	0	5	14
1	1980-08-11	220	190	116	110	100	8901.49	17	2	17	26871.2	1699	2860.39	47.3487	1980-07-25	6041.1	5	0	0	12	0	0	0	0	17	14
1	1980-08-14	220	190	116	110	100	8901.49	20	2	20	26871.2	1700	2860.39	47.3487	1980-07-25	6041.1	5	0	0	15	0	0	0	0	20	14
1	1980-08-18	220	190	116	110	100	8901.49	33	2	24	26871.2	1701	2860.39	47.3487	1980-07-25	6041.1	5	0	0	15	0	0	10	3	20	14
1	1980-08-21	220	190	116	110	100	8901.49	40	2	27	26871.2	1702	2860.39	47.3487	1980-07-25	6041.1	5	0	0	15	0	0	10	10	20	14
1	1980-08-26	200	150	116	110	100	8901.49	50	2	32	26871.2	1703	2860.39	47.3487	1980-07-25	6041.1	5	0	0	15	0	0	5	25	20	14
1	1980-08-29	220	160	116	110	100	8901.49	75	2	35	26871.2	1704	2860.39	47.3487	1980-07-25	6041.1	5	0	0	15	0	0	10	45	20	14
1	1980-09-02	200	160	116	110	100	8901.49	80	2	39	26871.2	1705	2860.39	47.3487	1980-07-25	6041.1	5	0	0	15	0	0	10	50	20	14
1	1980-09-05	200	170	116	110	100	8901.49	95	2	42	26871.2	1706	2860.39	47.3487	1980-07-25	6041.1	5	0	0	15	0	0	0	75	20	14
1	1980-09-08	220	170	116	110	100	8901.49	95	2	45	26871.2	1707	2860.39	47.3487	1980-07-25	6041.1	5	0	0	15	0	0	0	75	20	14
1	1980-09-11	190	160	116	110	100	8901.49	95	3	48	26871.2	1708	2860.39	47.3487	1980-07-25	6041.1	5	0	0	15	0	0	0	75	20	14
1	1980-07-25	180	150	117	47	48	1821.68	0	1	0	5504.33	1709	0	0	1980-07-25	1821.68	0	0	0	0	0	0	0	0	0	14
1	1980-07-29	250	150	117	59	61	2906.61	2	2	4	8778.65	1710	1084.93	59.5568	1980-07-25	1821.68	2	0	0	0	0	0	0	0	2	14
1	1980-08-01	250	200	117	61	64	3153.87	4	2	7	9524.89	1711	1332.2	73.1302	1980-07-25	1821.68	4	0	0	0	0	0	0	0	4	14
1	1980-08-04	260	210	117	63	65	3307.07	5	2	10	9987.26	1712	1485.4	81.5402	1980-07-25	1821.68	5	0	0	0	0	0	0	0	5	14
1	1980-08-07	240	190	117	63	65	3307.07	5	3	13	9987.26	1713	1485.4	81.5402	1980-07-25	1821.68	5	0	0	0	0	0	0	0	5	14
1	1980-07-25	180	150	118	62	59	2955.25	4	1	0	8925.46	1714	0	0	1980-07-25	2955.25	2	0	2	0	0	0	0	0	4	14
1	1980-07-29	250	150	118	64	62	3204.54	4	2	4	9677.79	1715	249.282	8.43522	1980-07-25	2955.25	2	0	2	0	0	0	0	0	4	14
1	1980-08-01	250	200	118	66	64	3411.23	4	2	7	10301.6	1716	455.974	15.4293	1980-07-25	2955.25	2	0	2	0	0	0	0	0	4	14
1	1980-08-04	260	210	118	66	64	3411.23	34	2	10	10301.6	1717	455.974	15.4293	1980-07-25	2955.25	2	0	2	0	0	0	30	0	4	14
1	1980-08-07	240	190	118	71	70	4012.94	54	2	13	12117.5	1718	1057.68	35.7899	1980-07-25	2955.25	2	0	2	0	0	0	0	50	4	14
1	1980-08-11	220	190	118	71	70	4012.94	54	3	17	12117.5	1719	1057.68	35.7899	1980-07-25	2955.25	2	0	2	0	0	0	0	50	4	14
1	1980-07-25	180	150	119	82	79	5232.1	0	1	0	15797	1720	0	0	1980-07-25	5232.1	0	0	0	0	0	0	0	0	0	14
1	1980-07-29	250	150	119	93	93	6983.13	3	2	4	21081.6	1721	1751.03	33.4671	1980-07-25	5232.1	3	0	0	0	0	0	0	0	3	14
1	1980-08-01	250	200	119	95	93	7134.11	6	2	7	21537.2	1722	1902.01	36.3528	1980-07-25	5232.1	6	0	0	0	0	0	0	0	6	14
1	1980-08-04	260	210	119	95	93	7134.11	6	2	10	21537.2	1723	1902.01	36.3528	1980-07-25	5232.1	6	0	0	0	0	0	0	0	6	14
1	1980-08-07	240	190	119	95	94	7210.21	8	2	13	21766.9	1724	1978.11	37.8072	1980-07-25	5232.1	8	0	0	0	0	0	0	0	8	14
1	1980-08-11	220	190	119	97	94	7363.61	8	2	17	22229.9	1725	2131.51	40.7392	1980-07-25	5232.1	8	0	0	0	0	0	0	0	8	14
1	1980-08-14	220	190	119	97	94	7363.61	8	2	20	22229.9	1726	2131.51	40.7392	1980-07-25	5232.1	8	0	0	0	0	0	0	0	8	14
1	1980-08-18	220	190	119	98	96	7596.74	14	2	24	22933.5	1727	2364.65	45.195	1980-07-25	5232.1	8	0	0	0	0	0	3	3	8	14
1	1980-08-21	220	190	119	98	96	7596.74	19	2	27	22933.5	1728	2364.65	45.195	1980-07-25	5232.1	8	0	0	0	1	0	5	5	8	14
1	1980-08-26	200	150	119	98	96	7596.74	19	3	32	22933.5	1729	2364.65	45.195	1980-07-25	5232.1	8	0	0	0	1	0	5	5	8	14
1	1980-07-25	180	150	120	72	68	4541.58	0	1	0	13713	1730	0	0	1980-07-25	4541.58	0	0	0	0	0	0	0	0	0	14
1	1980-07-29	250	150	120	81	80	5562.12	1	2	4	16793	1731	1020.54	22.4711	1980-07-25	4541.58	1	0	0	0	0	0	0	0	1	14
1	1980-08-01	250	200	120	82	83	5764.98	1	2	7	17405.2	1732	1223.4	26.9378	1980-07-25	4541.58	1	0	0	0	0	0	0	0	1	14
1	1980-08-04	260	210	120	86	84	5833.4	3	2	10	17611.7	1733	1291.83	28.4444	1980-07-25	4541.58	3	0	0	0	0	0	0	0	3	14
1	1980-08-07	240	190	120	86	84	5902.23	8	2	13	17819.4	1734	1360.66	29.96	1980-07-25	4541.58	3	0	0	0	0	0	5	0	3	14
1	1980-08-11	220	190	120	86	85	5971.47	9	2	17	18028.4	1735	1429.89	31.4844	1980-07-25	4541.58	4	0	0	0	0	0	5	0	4	14
1	1980-08-14	220	190	120	87	85	5971.47	11	2	20	18028.4	1736	1429.89	31.4844	1980-07-25	4541.58	4	0	0	0	0	0	5	2	4	14
1	1980-08-18	220	190	120	87	85	5971.47	13	2	24	18028.4	1737	1429.89	31.4844	1980-07-25	4541.58	5	0	0	0	0	0	3	5	5	14
1	1980-08-21	220	190	120	87	85	5971.47	17	2	27	18028.4	1738	1429.89	31.4844	1980-07-25	4541.58	5	0	0	0	0	0	2	10	5	14
1	1980-08-26	200	150	120	87	85	5971.47	32	2	32	18028.4	1739	1429.89	31.4844	1980-07-25	4541.58	5	0	0	0	0	0	5	22	5	14
1	1980-08-29	220	160	120	87	85	4975.35	80	2	35	15022.1	1740	433.771	9.55111	1980-07-25	4541.58	5	0	0	0	0	0	25	50	5	14
1	1980-09-02	200	160	120	87	85	5971.47	80	3	39	18028.4	1741	1429.89	31.4844	1980-07-25	4541.58	5	0	0	0	0	0	25	50	5	14
1	1980-07-25	180	150	121	72	69	4012.94	2	1	0	12117.5	1742	0	0	1980-07-25	4012.94	2	0	0	0	0	0	0	0	2	14
1	1980-07-29	250	150	121	78	76	4787.02	2	2	4	14453.7	1743	774.086	19.2898	1980-07-25	4012.94	2	0	0	0	0	0	0	0	2	14
1	1980-08-01	250	200	121	80	76	4912.17	3	2	7	14831.4	1744	899.232	22.4083	1980-07-25	4012.94	3	0	0	0	0	0	0	0	3	14
1	1980-08-04	260	210	121	80	78	5038.93	3	2	10	15214	1745	1025.99	25.5671	1980-07-25	4012.94	3	0	0	0	0	0	0	0	3	14
1	1980-08-07	240	190	121	81	78	5102.91	6	2	13	15407.1	1746	1089.98	27.1616	1980-07-25	4012.94	3	0	0	0	0	0	3	0	3	14
1	1980-08-11	220	190	121	81	78	5102.91	98	2	17	15407.1	1747	1089.98	27.1616	1980-07-25	4012.94	3	0	0	0	0	0	5	90	3	14
1	1980-08-14	220	190	121	81	78	5102.91	98	3	20	15407.1	1748	1089.98	27.1616	1980-07-25	4012.94	3	0	0	0	0	0	5	90	3	14
1	1980-07-29	250	150	122	74	71	4243.85	0	1	0	12814.4	1749	0	0	1980-07-29	4243.85	0	0	0	0	0	0	0	0	0	15
1	1980-08-01	250	200	122	82	79	5232.1	0	2	3	15797	1750	988.247	23.2866	1980-07-29	4243.85	0	0	0	0	0	0	0	0	0	15
1	1980-08-04	260	210	122	85	82	5629.33	3	2	6	16995.8	1751	1385.48	32.6468	1980-07-29	4243.85	3	0	0	0	0	0	0	0	3	15
1	1980-08-07	240	190	122	85	82	5629.33	4	2	9	16995.8	1752	1385.48	32.6468	1980-07-29	4243.85	4	0	0	0	0	0	0	0	4	15
1	1980-08-11	220	190	122	85	83	5696.95	4	2	13	17199.9	1753	1453.1	34.2402	1980-07-29	4243.85	4	0	0	0	0	0	0	0	4	15
1	1980-08-14	220	190	122	86	83	5764.98	7	2	16	17405.2	1754	1521.13	35.843	1980-07-29	4243.85	5	0	0	0	0	0	1	1	5	15
1	1980-08-18	220	190	122	87	83	5833.4	9	2	20	17611.7	1755	1589.55	37.4554	1980-07-29	4243.85	5	0	0	0	0	0	3	1	5	15
1	1980-08-21	220	190	122	87	83	5833.4	27	2	23	17611.7	1756	1589.55	37.4554	1980-07-29	4243.85	5	0	0	0	0	0	20	2	5	15
1	1980-08-26	200	150	122	87	83	5833.4	27	3	28	17611.7	1757	1589.55	37.4554	1980-07-29	4243.85	5	0	0	0	0	0	20	2	5	15
1	1980-07-29	250	150	123	64	57	2955.25	0	1	0	8925.46	1758	0	0	1980-07-29	2955.25	0	0	0	0	0	0	0	0	0	15
1	1980-08-01	250	200	123	69	62	3463.91	0	2	3	10460.6	1759	508.656	17.2119	1980-07-29	2955.25	0	0	0	0	0	0	0	0	0	15
1	1980-08-04	260	210	123	69	63	3517	3	2	6	10620.8	1760	561.742	19.0083	1980-07-29	2955.25	3	0	0	0	0	0	0	0	3	15
1	1980-08-07	240	190	123	70	63	3570.49	30	2	9	10782.2	1761	615.232	20.8183	1980-07-29	2955.25	30	0	0	0	0	0	0	0	30	15
1	1980-08-11	220	190	123	70	63	3570.49	45	2	13	10782.2	1762	615.232	20.8183	1980-07-29	2955.25	40	0	0	0	0	0	5	0	40	15
1	1980-08-14	220	190	123	70	63	3570.49	70	2	16	10782.2	1763	615.232	20.8183	1980-07-29	2955.25	58	0	0	0	0	0	2	10	58	15
1	1980-08-18	220	190	123	70	63	3570.49	86	2	20	10782.2	1764	615.232	20.8183	1980-07-29	2955.25	72	0	0	0	0	0	0	14	72	15
1	1980-08-21	220	190	123	70	63	3570.49	86	3	23	10782.2	1765	615.232	20.8183	1980-07-29	2955.25	72	0	0	0	0	0	0	14	72	15
1	1980-07-29	250	150	124	72	71	4127.59	0	1	0	12463.6	1766	0	0	1980-07-29	4127.59	0	0	0	0	0	0	0	0	0	15
1	1980-08-01	250	200	124	87	79	5562.12	0	2	3	16793	1767	1434.53	34.7548	1980-07-29	4127.59	0	0	0	0	0	0	0	0	0	15
1	1980-08-04	260	210	124	87	81	5696.95	3	2	6	17199.9	1768	1569.37	38.0214	1980-07-29	4127.59	3	0	0	0	0	0	0	0	3	15
1	1980-08-07	240	190	124	91	83	6111.14	5	2	9	18449.9	1769	1983.56	48.0561	1980-07-29	4127.59	5	0	0	0	0	0	0	0	5	15
1	1980-08-11	220	190	124	91	83	6111.14	12	2	13	18449.9	1770	1983.56	48.0561	1980-07-29	4127.59	12	0	0	0	0	0	0	0	12	15
1	1980-08-14	220	190	124	91	84	6181.59	15	2	16	18662.5	1771	2054	49.7628	1980-07-29	4127.59	15	0	0	0	0	0	0	0	15	15
1	1980-08-18	220	190	124	91	84	6181.59	35	2	20	18662.5	1772	2054	49.7628	1980-07-29	4127.59	15	0	0	0	0	0	10	10	15	15
1	1980-08-21	220	190	124	91	84	6181.59	57	2	23	18662.5	1773	2054	49.7628	1980-07-29	4127.59	15	0	0	0	0	0	12	30	15	15
1	1980-08-26	200	150	124	91	84	6181.59	95	2	28	18662.5	1774	2054	49.7628	1980-07-29	4127.59	15	0	0	0	0	0	20	60	15	15
1	1980-08-29	220	160	124	91	84	6181.59	100	2	31	18662.5	1775	2054	49.7628	1980-07-29	4127.59	15	0	0	0	0	0	0	85	15	15
1	1980-09-02	200	160	124	91	84	6181.59	100	3	35	18662.5	1776	2054	49.7628	1980-07-29	4127.59	15	0	0	0	0	0	0	85	15	15
1	1980-07-29	250	150	125	74	68	4070.06	0	1	0	12289.9	1777	0	0	1980-07-29	4070.06	0	0	0	0	0	0	0	0	0	15
1	1980-08-01	250	200	125	80	75	4849.39	2	2	3	14642	1778	779.334	19.148	1980-07-29	4070.06	2	0	0	0	0	0	0	0	2	15
1	1980-08-04	260	210	125	82	75	4975.35	2	2	6	15022.1	1779	905.287	22.2426	1980-07-29	4070.06	2	0	0	0	0	0	0	0	2	15
1	1980-08-07	240	190	125	84	78	5297.29	2	2	9	15993.7	1780	1227.23	30.1527	1980-07-29	4070.06	2	0	0	0	0	0	0	0	2	15
1	1980-08-11	220	190	125	84	79	5362.89	3	2	13	16191.7	1781	1292.84	31.7645	1980-07-29	4070.06	3	0	0	0	0	0	0	0	3	15
1	1980-08-14	220	190	125	85	79	5428.9	3	2	16	16390.9	1782	1358.84	33.3862	1980-07-29	4070.06	3	0	0	0	0	0	0	0	3	15
1	1980-08-18	220	190	125	85	79	5428.9	40	2	20	16390.9	1783	1358.84	33.3862	1980-07-29	4070.06	3	0	0	0	0	0	25	12	3	15
1	1980-08-21	220	190	125	85	79	5428.9	100	2	23	16390.9	1784	1358.84	33.3862	1980-07-29	4070.06	3	0	0	0	0	0	47	50	3	15
1	1980-08-26	200	150	125	85	79	5428.9	100	2	28	16390.9	1785	1358.84	33.3862	1980-07-29	4070.06	3	0	0	0	0	0	1	96	3	15
1	1980-08-29	220	160	125	85	79	5428.9	100	3	31	16390.9	1786	1358.84	33.3862	1980-07-29	4070.06	3	0	0	0	0	0	1	96	3	15
1	1980-07-29	250	150	126	87	80	5629.33	0	1	0	16995.8	1787	0	0	1980-07-29	5629.33	0	0	0	0	0	0	0	0	0	15
1	1980-08-01	250	200	126	102	91	7518.63	2	2	3	22697.7	1788	1889.3	33.5616	1980-07-29	5629.33	2	0	0	0	0	0	0	0	2	15
1	1980-08-04	260	210	126	109	97	8565.61	3	2	6	25857.5	1789	2936.28	52.1603	1980-07-29	5629.33	2	1	0	0	0	0	0	0	3	15
1	1980-08-07	240	190	126	111	99	8901.49	3	2	9	26871.2	1790	3272.15	58.1269	1980-07-29	5629.33	2	1	0	0	0	0	0	0	3	15
1	1980-08-11	220	190	126	113	100	9157.63	3	2	13	27644.2	1791	3528.3	62.677	1980-07-29	5629.33	2	1	0	0	0	0	0	0	3	15
1	1980-08-14	220	190	126	113	101	9243.82	3	2	16	27904.4	1792	3614.49	64.2081	1980-07-29	5629.33	2	1	0	0	0	0	0	0	3	15
1	1980-08-18	220	190	126	113	101	9243.82	3	2	20	27904.4	1793	3614.49	64.2081	1980-07-29	5629.33	2	1	0	0	0	0	0	0	3	15
1	1980-08-21	220	190	126	113	101	9243.82	3	2	23	27904.4	1794	3614.49	64.2081	1980-07-29	5629.33	2	1	0	0	0	0	0	0	3	15
1	1980-08-26	200	150	126	113	101	9243.82	40	2	28	27904.4	1795	3614.49	64.2081	1980-07-29	5629.33	2	1	0	0	0	0	25	12	3	15
1	1980-08-29	220	160	126	113	101	9243.82	63	2	31	27904.4	1796	3614.49	64.2081	1980-07-29	5629.33	2	1	0	0	0	0	15	45	3	15
1	1980-09-02	200	160	126	113	101	9243.82	63	3	35	27904.4	1797	3614.49	64.2081	1980-07-29	5629.33	2	1	0	0	0	0	15	45	3	15
1	1980-07-29	250	150	127	55	50	2225.37	1	1	0	6722.68	1798	0	0	1980-07-29	2225.37	1	0	0	0	0	0	0	0	1	15
1	1980-08-01	250	200	127	57	51	2354.35	10	2	3	7111.94	1799	128.981	5.79592	1980-07-29	2225.37	10	0	0	0	0	0	0	0	10	15
1	1980-08-04	260	210	127	58	51	2398.15	12	2	6	7244.13	1800	172.782	7.76417	1980-07-29	2225.37	12	0	0	0	0	0	0	0	12	15
1	1980-08-07	240	190	127	58	53	2486.97	25	2	9	7512.17	1801	261.595	11.7551	1980-07-29	2225.37	25	0	0	0	0	0	0	0	25	15
1	1980-08-11	220	190	127	58	54	2531.98	25	2	13	7648.02	1802	306.607	13.7778	1980-07-29	2225.37	25	0	0	0	0	0	0	0	25	15
1	1980-08-14	220	190	127	58	54	2531.98	25	3	16	7648.02	1803	306.607	13.7778	1980-07-29	2225.37	25	0	0	0	0	0	0	0	25	15
1	1980-07-29	250	150	128	56	49	2225.37	0	1	0	6722.68	1804	0	0	1980-07-29	2225.37	0	0	0	0	0	0	0	0	0	15
1	1980-08-01	250	200	128	60	52	2531.98	4	2	3	7648.02	1805	306.607	13.7778	1980-07-29	2225.37	4	0	0	0	0	0	0	0	4	15
1	1980-08-04	260	210	128	62	53	2669.44	10	2	6	8062.87	1806	444.065	19.9546	1980-07-29	2225.37	10	0	0	0	0	0	0	0	10	15
1	1980-08-07	240	190	128	63	54	2763.09	25	2	9	8345.53	1807	537.723	24.1633	1980-07-29	2225.37	25	0	0	0	0	0	0	0	25	15
1	1980-08-11	220	190	128	63	54	2763.09	30	2	13	8345.53	1808	537.723	24.1633	1980-07-29	2225.37	25	0	0	0	0	0	2	3	25	15
1	1980-08-14	220	190	128	65	54	2858.37	45	2	16	8633.06	1809	632.995	28.4444	1980-07-29	2225.37	25	0	0	0	0	0	15	5	25	15
1	1980-08-18	220	190	128	65	54	2858.37	45	3	20	8633.06	1810	632.995	28.4444	1980-07-29	2225.37	25	0	0	0	0	0	15	5	25	16
1	1980-07-29	250	150	129	48	41	1598.84	0	1	0	4831.79	1811	0	0	1980-07-29	1598.84	0	0	0	0	0	0	0	0	0	16
1	1980-08-01	250	200	129	65	51	2716.06	0	2	3	8203.59	1812	1117.23	69.8775	1980-07-29	1598.84	0	0	0	0	0	0	0	0	0	16
1	1980-08-04	260	210	129	65	56	2955.25	1	2	6	8925.46	1813	1356.42	84.8378	1980-07-29	1598.84	1	0	0	0	0	0	0	0	1	16
1	1980-08-07	240	190	129	66	57	3053.76	4	2	9	9222.74	1814	1454.92	90.9986	1980-07-29	1598.84	3	0	0	0	1	0	0	0	3	16
1	1980-08-11	220	190	129	67	58	3153.87	6	2	13	9524.89	1815	1555.04	97.2604	1980-07-29	1598.84	5	0	0	0	1	0	0	0	5	16
1	1980-08-14	220	190	129	68	58	3204.54	6	2	16	9677.79	1816	1605.7	100.429	1980-07-29	1598.84	5	0	0	0	1	0	0	0	5	16
1	1980-08-18	220	190	129	68	59	3255.6	6	2	20	9831.92	1817	1656.77	103.623	1980-07-29	1598.84	5	0	0	0	1	0	0	0	5	16
1	1980-08-21	220	190	129	68	59	3255.6	11	2	23	9831.92	1818	1656.77	103.623	1980-07-29	1598.84	5	0	0	0	1	0	5	0	5	16
1	1980-08-26	200	150	129	68	59	3255.6	21	2	28	9831.92	1819	1656.77	103.623	1980-07-29	1598.84	5	0	0	0	1	0	5	10	5	16
1	1980-08-29	220	160	129	68	59	3255.6	96	2	31	9831.92	1820	1656.77	103.623	1980-07-29	1598.84	5	0	0	0	1	0	60	30	5	16
1	1980-09-02	200	160	129	68	59	3255.6	96	3	35	9831.92	1821	1656.77	103.623	1980-07-29	1598.84	5	0	0	0	1	0	60	30	5	16
1	1980-07-29	250	150	130	83	77	5167.3	0	1	0	15601.4	1822	0	0	1980-07-29	5167.3	0	0	0	0	0	0	0	0	0	16
1	1980-08-01	250	200	130	97	90	7058.42	1	2	3	21308.8	1823	1891.11	36.5977	1980-07-29	5167.3	1	0	0	0	0	0	0	0	1	16
1	1980-08-04	260	210	130	102	93	7675.26	3	2	6	23170.4	1824	2507.96	48.5352	1980-07-29	5167.3	3	0	0	0	0	0	0	0	3	16
1	1980-08-07	240	190	130	103	94	7833.51	4	2	9	23648	1825	2666.21	51.5977	1980-07-29	5167.3	4	0	0	0	0	0	0	0	4	16
1	1980-08-11	220	190	130	103	97	8073.91	4	2	13	24373.6	1826	2906.61	56.25	1980-07-29	5167.3	4	0	0	0	0	0	0	0	4	16
1	1980-08-14	220	190	130	103	98	8154.85	5	2	16	24617.9	1827	2987.55	57.8164	1980-07-29	5167.3	5	0	0	0	0	0	0	0	5	16
1	1980-08-18	220	190	130	106	98	8400.1	5	2	20	25358	1828	3232.79	62.5625	1980-07-29	5167.3	5	0	0	0	0	0	0	0	5	16
1	1980-08-21	220	190	130	106	98	8400.1	6	2	23	25358	1829	3232.79	62.5625	1980-07-29	5167.3	5	0	0	0	1	0	0	0	5	16
1	1980-08-26	200	150	130	106	99	8482.65	6	2	28	25607.2	1830	3315.35	64.1602	1980-07-29	5167.3	5	0	0	0	1	0	0	0	5	16
1	1980-08-29	220	160	130	106	100	8565.61	12	2	31	25857.5	1831	3398.31	65.7656	1980-07-29	5167.3	5	0	0	0	1	0	5	1	5	16
1	1980-09-02	200	160	130	107	100	8648.98	25	2	35	26109.1	1832	3481.67	67.3789	1980-07-29	5167.3	5	0	0	0	1	0	12	7	5	16
1	1980-09-05	200	170	130	107	100	8648.98	41	2	38	26109.1	1833	3481.67	67.3789	1980-07-29	5167.3	5	0	0	0	1	0	15	20	5	16
1	1980-09-08	220	170	130	107	100	8648.98	41	2	41	26109.1	1834	3481.67	67.3789	1980-07-29	5167.3	5	0	0	0	1	0	10	25	5	16
1	1980-09-11	190	160	130	107	100	8648.98	41	3	44	26109.1	1835	3481.67	67.3789	1980-07-29	5167.3	5	0	0	0	1	0	10	25	5	16
1	1980-07-29	250	150	131	87	78	5495.31	0	1	0	16591.3	1836	0	0	1980-07-29	5495.31	0	0	0	0	0	0	0	0	0	16
1	1980-08-01	250	200	131	93	85	6395.35	2	2	3	19307.7	1837	900.039	16.3783	1980-07-29	5495.31	2	0	0	0	0	0	0	0	2	16
1	1980-08-04	260	210	131	95	88	6759.68	2	2	6	20407.2	1838	1264.37	23.0083	1980-07-29	5495.31	2	0	0	0	0	0	0	0	2	16
1	1980-08-07	240	190	131	97	89	6983.13	2	2	9	21081.6	1839	1487.82	27.0744	1980-07-29	5495.31	2	0	0	0	0	0	0	0	2	16
1	1980-08-11	220	190	131	97	90	7058.42	3	2	13	21308.8	1840	1563.11	28.4444	1980-07-29	5495.31	3	0	0	0	0	0	0	0	3	16
1	1980-08-14	220	190	131	100	91	7363.61	3	2	16	22229.9	1841	1868.3	33.9982	1980-07-29	5495.31	3	0	0	0	0	0	0	0	3	16
1	1980-08-18	220	190	131	101	92	7518.63	5	2	20	22697.7	1842	2023.32	36.8191	1980-07-29	5495.31	3	0	0	0	0	0	1	1	3	16
1	1980-08-21	220	190	131	101	92	7518.63	5	2	23	22697.7	1843	2023.32	36.8191	1980-07-29	5495.31	3	0	0	0	0	0	0	2	3	16
1	1980-08-26	200	150	131	101	92	7518.63	90	2	28	22697.7	1844	2023.32	36.8191	1980-07-29	5495.31	3	0	0	0	0	0	85	2	3	16
1	1980-08-29	220	160	131	101	92	7518.63	93	2	31	22697.7	1845	2023.32	36.8191	1980-07-29	5495.31	3	0	0	0	0	0	0	90	3	16
1	1980-09-02	200	160	131	101	92	7518.63	93	3	35	22697.7	1846	2023.32	36.8191	1980-07-29	5495.31	3	0	0	0	0	0	0	90	3	16
1	1980-08-01	250	200	132	78	68	4302.59	0	1	0	12991.7	1847	0	0	1980-08-01	4302.59	0	0	0	0	0	0	0	0	0	16
1	1980-08-04	260	210	132	91	81	5971.47	3	2	3	18028.4	1848	1668.88	38.7878	1980-08-01	4302.59	3	0	0	0	0	0	0	0	3	16
1	1980-08-07	240	190	132	95	84	6467.41	7	2	6	19525.1	1849	2164.82	50.3143	1980-08-01	4302.59	7	0	0	0	0	0	0	0	7	16
1	1980-08-11	220	190	132	97	85	6686.01	20	2	10	20184.9	1850	2383.42	55.395	1980-08-01	4302.59	20	0	0	0	0	0	0	0	20	16
1	1980-08-14	220	190	132	97	85	6686.01	20	2	13	20184.9	1851	2383.42	55.395	1980-08-01	4302.59	20	0	0	0	0	0	0	0	20	16
1	1980-08-18	220	190	132	97	85	6686.01	22	2	17	20184.9	1852	2383.42	55.395	1980-08-01	4302.59	20	0	0	0	0	0	1	1	20	16
1	1980-08-21	220	190	132	97	88	6908.24	22	2	20	20855.6	1853	2605.65	60.5601	1980-08-01	4302.59	20	0	0	0	0	0	0	2	20	16
1	1980-08-26	200	150	132	97	90	7058.42	34	2	25	21308.8	1854	2755.83	64.0505	1980-08-01	4302.59	20	0	0	0	0	0	10	4	20	16
1	1980-08-29	220	160	132	97	90	7058.42	34	3	28	21308.8	1855	2755.83	64.0505	1980-08-01	4302.59	20	0	0	0	0	0	10	4	20	16
1	1980-08-01	250	200	133	77	72	4481.22	0	1	0	13530.8	1856	0	0	1980-08-01	4481.22	0	0	0	0	0	0	0	0	0	16
1	1980-08-04	260	210	133	79	75	4787.02	3	2	3	14453.7	1857	305.799	6.82402	1980-08-01	4481.22	3	0	0	0	0	0	0	0	3	16
1	1980-08-07	240	190	133	81	76	4975.35	6	2	6	15022.1	1858	494.123	11.0265	1980-08-01	4481.22	6	0	0	0	0	0	0	0	6	16
1	1980-08-11	220	190	133	81	76	4975.35	7	2	10	15022.1	1859	494.123	11.0265	1980-08-01	4481.22	7	0	0	0	0	0	0	0	7	16
1	1980-08-14	220	190	133	81	77	5038.93	7	2	13	15214	1860	557.705	12.4454	1980-08-01	4481.22	7	0	0	0	0	0	0	0	7	16
1	1980-08-18	220	190	133	81	78	5102.91	10	2	17	15407.1	1861	621.691	13.8732	1980-08-01	4481.22	7	0	0	0	0	0	2	1	7	16
1	1980-08-21	220	190	133	81	78	5102.91	60	2	20	15407.1	1862	621.691	13.8732	1980-08-01	4481.22	7	0	0	0	0	0	50	3	7	16
1	1980-08-26	200	150	133	81	78	5102.91	100	2	25	15407.1	1863	621.691	13.8732	1980-08-01	4481.22	7	0	0	0	0	0	2	91	7	16
1	1980-08-29	220	160	133	89	78	5629.33	94	2	28	16995.8	1864	1148.11	25.6205	1980-08-01	4481.22	9	0	0	0	0	0	0	85	9	16
1	1980-09-02	200	160	133	89	78	5629.33	94	3	32	16995.8	1865	1148.11	25.6205	1980-08-01	4481.22	9	0	0	0	0	0	0	85	9	16
1	1980-08-01	250	200	134	45	43	1563.11	0	1	0	4723.97	1866	0	0	1980-08-01	1563.11	0	0	0	0	0	0	0	0	0	16
1	1980-08-04	260	210	134	46	44	1634.97	1	2	3	4940.84	1867	71.8578	4.59711	1980-08-01	1563.11	1	0	0	0	0	0	0	0	1	16
1	1980-08-07	240	190	134	47	45	1708.44	22	2	6	5162.58	1868	145.33	9.29752	1980-08-01	1563.11	22	0	0	0	0	0	0	0	22	16
1	1980-08-11	220	190	134	48	45	1745.78	42	2	10	5275.27	1869	182.672	11.6865	1980-08-01	1563.11	40	0	0	0	0	0	2	0	40	16
1	1980-08-14	220	190	134	48	45	1745.78	79	2	13	5275.27	1870	182.672	11.6865	1980-08-01	1563.11	40	0	2	0	0	0	25	12	42	16
1	1980-08-18	220	190	134	48	45	1745.78	79	3	17	5275.27	1871	182.672	11.6865	1980-08-01	1563.11	40	0	2	0	0	0	25	12	42	17
1	1980-08-01	250	200	135	84	80	5428.9	4	1	0	16390.9	1872	0	0	1980-08-01	5428.9	4	0	0	0	0	0	0	0	4	17
1	1980-08-04	260	210	135	84	81	5495.31	10	2	3	16591.3	1873	66.4079	1.22323	1980-08-01	5428.9	10	0	0	0	0	0	0	0	10	17
1	1980-08-07	240	190	135	89	85	6111.14	15	2	6	18449.9	1874	682.246	12.5669	1980-08-01	5428.9	15	0	0	0	0	0	0	0	15	17
1	1980-08-11	220	190	135	89	85	6111.14	25	2	10	18449.9	1875	682.246	12.5669	1980-08-01	5428.9	25	0	0	0	0	0	0	0	25	17
1	1980-08-14	220	190	135	89	85	6111.14	25	2	13	18449.9	1876	682.246	12.5669	1980-08-01	5428.9	25	0	0	0	0	0	0	0	25	17
1	1980-08-18	220	190	135	90	85	6181.59	29	2	17	18662.5	1877	752.69	13.8645	1980-08-01	5428.9	25	0	0	0	0	0	3	1	25	17
1	1980-08-21	220	190	135	90	85	6181.59	32	2	20	18662.5	1878	752.69	13.8645	1980-08-01	5428.9	25	0	0	0	0	0	5	2	25	17
1	1980-08-26	200	150	135	90	85	6181.59	35	2	25	18662.5	1879	752.69	13.8645	1980-08-01	5428.9	25	0	0	0	0	0	5	5	25	17
1	1980-08-29	220	160	135	90	85	6181.59	39	2	28	18662.5	1880	752.69	13.8645	1980-08-01	5428.9	25	0	0	0	0	0	0	14	25	17
1	1980-09-02	200	160	135	90	85	6181.59	65	2	32	18662.5	1881	752.69	13.8645	1980-08-01	5428.9	25	0	0	0	0	0	10	30	25	17
1	1980-09-05	200	170	135	90	85	6181.59	65	3	35	18662.5	1882	752.69	13.8645	1980-08-01	5428.9	25	0	0	0	0	0	10	30	25	17
1	1980-08-04	260	210	136	113	92	8482.65	2	1	0	25607.2	1883	0	0	1980-08-04	8482.65	2	0	0	0	0	0	0	0	2	17
1	1980-08-07	240	190	136	118	98	9417.41	4	2	3	28428.3	1884	934.757	11.0196	1980-08-04	8482.65	4	0	0	0	0	0	0	0	4	17
1	1980-08-11	220	190	136	124	103	10401	6	2	7	31396.8	1885	1918.36	22.6151	1980-08-04	8482.65	6	0	0	0	0	0	0	0	6	17
1	1980-08-14	220	190	136	126	104	10677.7	6	2	10	32232	1886	2195.09	25.8775	1980-08-04	8482.65	6	0	0	0	0	0	0	0	6	17
1	1980-08-18	220	190	136	128	105	10958.1	6	2	14	33078.1	1887	2475.46	29.1826	1980-08-04	8482.65	6	0	0	0	0	0	0	0	6	17
1	1980-08-21	220	190	136	128	106	11052.4	6	2	17	33362.6	1888	2569.72	30.2939	1980-08-04	8482.65	6	0	0	0	0	0	0	0	6	17
1	1980-08-26	200	150	136	128	106	11052.4	6	2	22	33362.6	1889	2569.72	30.2939	1980-08-04	8482.65	6	0	0	0	0	0	0	0	6	17
1	1980-08-29	220	160	136	128	107	11147	13	2	25	33648.3	1890	2664.39	31.4099	1980-08-04	8482.65	6	0	0	0	0	0	5	2	6	17
1	1980-09-02	200	160	136	128	107	11147	66	2	29	33648.3	1891	2664.39	31.4099	1980-08-04	8482.65	6	0	0	0	0	0	50	10	6	17
1	1980-09-05	200	170	136	128	107	11147	96	2	32	33648.3	1892	2664.39	31.4099	1980-08-04	8482.65	6	0	0	0	0	0	70	20	6	17
1	1980-09-08	220	170	136	128	107	11147	96	2	35	33648.3	1893	2664.39	31.4099	1980-08-04	8482.65	6	0	0	0	0	0	65	25	6	17
1	1980-09-11	190	160	136	128	107	11147	94	2	38	33648.3	1894	2664.39	31.4099	1980-08-04	8482.65	6	0	0	0	0	0	10	78	6	17
1	1980-09-16	170	140	136	128	107	11147	94	3	43	33648.3	1895	2664.39	31.4099	1980-08-04	8482.65	6	0	0	0	0	0	10	78	6	17
1	1980-08-04	260	210	137	77	69	4302.59	0	1	0	12991.7	1896	0	0	1980-08-04	4302.59	0	0	0	0	0	0	0	0	0	17
1	1980-08-07	240	190	137	87	78	5495.31	1	2	3	16591.3	1897	1192.72	27.721	1980-08-04	4302.59	1	0	0	0	0	0	0	0	1	17
1	1980-08-11	220	190	137	90	83	6041.1	3	2	7	18238.6	1898	1738.52	40.4063	1980-08-04	4302.59	3	0	0	0	0	0	0	0	3	17
1	1980-08-14	220	190	137	93	83	6252.44	3	2	10	18876.4	1899	1949.85	45.3181	1980-08-04	4302.59	3	0	0	0	0	0	0	0	3	17
1	1980-08-18	220	190	137	93	83	6252.44	4	2	14	18876.4	1900	1949.85	45.3181	1980-08-04	4302.59	3	0	0	0	0	0	0	1	3	17
1	1980-08-21	220	190	137	93	83	6252.44	4	2	17	18876.4	1901	1949.85	45.3181	1980-08-04	4302.59	3	0	0	0	0	0	0	1	3	17
1	1980-08-26	200	150	137	95	84	6467.41	4	2	22	19525.1	1902	2164.82	50.3143	1980-08-04	4302.59	3	0	0	0	0	0	0	1	3	17
1	1980-08-29	220	160	137	95	85	6539.87	4	2	25	19743.8	1903	2237.28	51.9985	1980-08-04	4302.59	3	0	0	0	0	0	0	1	3	17
1	1980-09-02	200	160	137	95	85	6539.87	12	2	29	19743.8	1904	2237.28	51.9985	1980-08-04	4302.59	3	1	0	0	0	0	5	3	4	17
1	1980-09-05	200	170	137	95	85	6539.87	24	2	32	19743.8	1905	2237.28	51.9985	1980-08-04	4302.59	3	1	0	0	0	0	10	10	4	17
1	1980-09-08	220	170	137	95	85	6539.87	24	3	35	19743.8	1906	2237.28	51.9985	1980-08-04	4302.59	3	1	0	0	0	0	10	10	4	17
1	1980-08-04	260	210	138	106	88	7596.74	0	1	0	22933.5	1907	0	0	1980-08-04	7596.74	0	0	0	0	0	0	0	0	0	17
1	1980-08-07	240	190	138	115	93	8732.74	3	2	3	26361.9	1908	1136	14.9538	1980-08-04	7596.74	3	0	0	0	0	0	0	0	3	17
1	1980-08-11	220	190	138	118	96	9243.82	7	2	7	27904.4	1909	1647.08	21.6814	1980-08-04	7596.74	7	0	0	0	0	0	0	0	7	17
1	1980-08-14	220	190	138	119	97	9417.41	10	2	10	28428.3	1910	1820.67	23.9664	1980-08-04	7596.74	10	0	0	0	0	0	0	0	10	17
1	1980-08-18	220	190	138	119	98	9504.81	10	2	14	28692	1911	1908.07	25.1169	1980-08-04	7596.74	10	0	0	0	0	0	0	0	10	17
1	1980-08-21	220	190	138	119	98	9504.81	10	2	17	28692	1912	1908.07	25.1169	1980-08-04	7596.74	10	0	0	0	0	0	0	0	10	17
1	1980-08-26	200	150	138	120	100	9769.43	10	2	22	29490.7	1913	2172.69	28.6003	1980-08-04	7596.74	10	0	0	0	0	0	0	0	10	17
1	1980-08-29	220	160	138	120	100	9769.43	14	2	25	29490.7	1914	2172.69	28.6003	1980-08-04	7596.74	12	0	0	0	0	0	1	1	12	17
1	1980-09-02	200	160	138	122	100	9947.87	27	2	29	30029.2	1915	2351.12	30.9491	1980-08-04	7596.74	15	0	0	0	0	0	2	10	15	17
1	1980-09-05	200	170	138	122	100	9947.87	50	2	32	30029.2	1916	2351.12	30.9491	1980-08-04	7596.74	15	0	0	0	0	0	10	25	15	17
1	1980-09-08	220	170	138	122	100	9947.87	100	2	35	30029.2	1917	2351.12	30.9491	1980-08-04	7596.74	15	0	0	0	0	0	10	75	15	17
1	1980-09-11	190	160	138	122	100	9947.87	100	3	38	30029.2	1918	2351.12	30.9491	1980-08-04	7596.74	15	0	0	0	0	0	10	75	15	17
1	1980-08-04	260	210	139	70	56	3204.54	0	1	0	9677.79	1919	0	0	1980-08-04	3204.54	0	0	0	0	0	0	0	0	0	17
1	1980-08-07	240	190	139	78	63	4012.94	1	2	3	12117.5	1920	808.4	25.2268	1980-08-04	3204.54	1	0	0	0	0	0	0	0	1	17
1	1980-08-11	220	190	139	84	69	4725.06	1	2	7	14266.7	1921	1520.52	47.449	1980-08-04	3204.54	1	0	0	0	0	0	0	0	1	17
1	1980-08-14	220	190	139	87	71	5038.93	4	2	10	15214	1922	1834.39	57.2436	1980-08-04	3204.54	4	0	0	0	0	0	0	0	4	17
1	1980-08-18	220	190	139	87	72	5102.91	5	2	14	15407.1	1923	1898.38	59.2404	1980-08-04	3204.54	5	0	0	0	0	0	0	0	5	17
1	1980-08-21	220	190	139	88	72	5167.3	11	2	17	15601.4	1924	1962.77	61.2497	1980-08-04	3204.54	6	5	0	0	0	0	0	0	11	17
1	1980-08-26	200	150	139	88	73	5232.1	12	2	22	15797	1925	2027.56	63.2716	1980-08-04	3204.54	7	5	0	0	0	0	0	0	12	17
1	1980-08-29	220	160	139	88	73	5232.1	12	2	25	15797	1926	2027.56	63.2716	1980-08-04	3204.54	7	5	0	0	0	0	0	0	12	17
1	1980-09-02	200	160	139	90	74	5428.9	15	2	29	16390.9	1927	2224.36	69.413	1980-08-04	3204.54	7	5	2	0	0	0	0	1	14	17
1	1980-09-05	200	170	139	90	74	5428.9	15	3	32	16390.9	1928	2224.36	69.413	1980-08-04	3204.54	7	5	2	0	0	0	0	1	14	17
1	1980-08-04	260	210	140	89	77	5562.12	1	1	0	16793	1929	0	0	1980-08-04	5562.12	1	0	0	0	0	0	0	0	1	17
1	1980-08-07	240	190	140	92	80	5971.47	4	2	3	18028.4	1930	409.347	7.35956	1980-08-04	5562.12	4	0	0	0	0	0	0	0	4	17
1	1980-08-11	220	190	140	95	82	6323.69	8	2	7	19091.4	1931	761.572	13.6921	1980-08-04	5562.12	8	0	0	0	0	0	0	0	8	17
1	1980-08-14	220	190	140	95	83	6395.35	10	2	10	19307.7	1932	833.228	14.9804	1980-08-04	5562.12	10	0	0	0	0	0	0	0	10	18
1	1980-08-18	220	190	140	95	83	6395.35	10	2	14	19307.7	1933	833.228	14.9804	1980-08-04	5562.12	10	0	0	0	0	0	0	0	10	18
1	1980-08-21	220	190	140	95	83	6395.35	10	2	17	19307.7	1934	833.228	14.9804	1980-08-04	5562.12	10	0	0	0	0	0	0	0	10	18
1	1980-08-26	200	150	140	95	83	6395.35	16	2	22	19307.7	1935	833.228	14.9804	1980-08-04	5562.12	10	0	0	0	0	0	3	3	10	18
1	1980-08-29	220	160	140	95	83	6395.35	100	2	25	19307.7	1936	833.228	14.9804	1980-08-04	5562.12	10	0	0	0	0	0	87	3	10	18
1	1980-09-02	200	160	140	95	83	6395.35	100	2	29	19307.7	1937	833.228	14.9804	1980-08-04	5562.12	10	0	0	0	0	0	55	35	10	18
1	1980-09-05	200	170	140	95	83	6395.35	100	2	32	19307.7	1938	833.228	14.9804	1980-08-04	5562.12	10	0	0	0	0	0	0	90	10	18
1	1980-09-08	220	170	140	95	83	6395.35	100	2	35	19307.7	1939	833.228	14.9804	1980-08-04	5562.12	10	0	0	0	0	0	0	90	10	18
1	1980-09-11	190	160	140	95	83	6395.35	100	3	38	19307.7	1940	833.228	14.9804	1980-08-04	5562.12	10	0	0	0	0	0	0	90	10	18
1	1980-08-04	260	210	141	46	43	1598.84	0	1	0	4831.79	1941	0	0	1980-08-04	1598.84	0	0	0	0	0	0	0	0	0	18
1	1980-08-07	240	190	141	48	44	1708.44	0	2	3	5162.58	1942	109.603	6.8552	1980-08-04	1598.84	0	0	0	0	0	0	0	0	0	18
1	1980-08-11	220	190	141	51	45	1860.23	0	2	7	5620.68	1943	261.393	16.3489	1980-08-04	1598.84	0	0	0	0	0	0	0	0	0	18
1	1980-08-14	220	190	141	51	46	1899.19	3	2	10	5738.25	1944	300.35	18.7855	1980-08-04	1598.84	0	0	3	0	0	0	0	0	3	18
1	1980-08-18	220	190	141	51	47	1938.55	11	2	14	5857.04	1945	339.71	21.2473	1980-08-04	1598.84	8	0	3	0	0	0	0	0	11	18
1	1980-08-21	220	190	141	51	47	1938.55	25	2	17	5857.04	1946	339.71	21.2473	1980-08-04	1598.84	22	0	3	0	0	0	0	0	25	18
1	1980-08-26	200	150	141	51	47	1938.55	25	3	22	5857.04	1947	339.71	21.2473	1980-08-04	1598.84	22	0	3	0	0	0	0	0	25	18
1	1980-08-04	260	210	142	94	79	6041.1	1	1	0	18238.6	1948	0	0	1980-08-04	6041.1	1	0	0	0	0	0	0	0	1	18
1	1980-08-07	240	190	142	108	92	8073.91	2	2	3	24373.6	1949	2032.81	33.6496	1980-08-04	6041.1	2	0	0	0	0	0	0	0	2	18
1	1980-08-11	220	190	142	113	95	8732.74	3	2	7	26361.9	1950	2691.64	44.5554	1980-08-04	6041.1	3	0	0	0	0	0	0	0	3	18
1	1980-08-14	220	190	142	118	98	9417.41	3	2	10	28428.3	1951	3376.31	55.8889	1980-08-04	6041.1	3	0	0	0	0	0	0	0	3	18
1	1980-08-18	220	190	142	118	100	9592.61	4	2	14	28957	1952	3551.51	58.7891	1980-08-04	6041.1	4	0	0	0	0	0	0	0	4	18
1	1980-08-21	220	190	142	118	100	9592.61	4	2	17	28957	1953	3551.51	58.7891	1980-08-04	6041.1	4	0	0	0	0	0	0	0	4	18
1	1980-08-26	200	150	142	118	100	9592.61	4	2	22	28957	1954	3551.51	58.7891	1980-08-04	6041.1	4	0	0	0	0	0	0	0	4	18
1	1980-08-29	220	160	142	119	100	9680.82	4	2	25	29223.2	1955	3639.72	60.2493	1980-08-04	6041.1	4	0	0	0	0	0	0	0	4	18
1	1980-09-02	200	160	142	119	100	9680.82	5	2	29	29223.2	1956	3639.72	60.2493	1980-08-04	6041.1	5	0	0	0	0	0	0	0	5	18
1	1980-09-05	200	170	142	119	100	9680.82	6	2	32	29223.2	1957	3639.72	60.2493	1980-08-04	6041.1	5	0	0	0	0	0	1	0	5	18
1	1980-09-08	220	170	142	119	100	9680.82	8	2	35	29223.2	1958	3639.72	60.2493	1980-08-04	6041.1	5	0	0	0	0	0	2	1	5	18
1	1980-09-11	190	160	142	119	101	9769.43	18	2	38	29490.7	1959	3728.33	61.7161	1980-08-04	6041.1	7	0	0	0	0	0	10	1	7	18
1	1980-09-16	170	140	142	119	101	9769.43	100	2	43	29490.7	1960	3728.33	61.7161	1980-08-04	6041.1	7	0	0	0	0	0	40	53	7	18
1	1980-09-19	180	150	142	119	101	9769.43	100	2	46	29490.7	1961	3728.33	61.7161	1980-08-04	6041.1	7	0	0	0	0	0	0	93	7	18
1	1980-09-22	210	150	142	119	101	9769.43	100	2	49	29490.7	1962	3728.33	61.7161	1980-08-04	6041.1	7	0	0	0	0	0	0	93	7	18
1	1980-09-25	200	160	142	119	101	9769.43	100	3	52	29490.7	1963	3728.33	61.7161	1980-08-04	6041.1	7	0	0	0	0	0	0	93	7	18
1	1980-08-04	260	210	143	59	49	2354.35	0	1	0	7111.94	1964	0	0	1980-08-04	2354.35	0	0	0	0	0	0	0	0	0	18
1	1980-08-07	240	190	143	59	49	2354.35	0	3	3	7111.94	1965	0	0	1980-08-04	2354.35	0	0	0	0	0	0	0	0	0	18
1	1980-08-04	260	210	144	56	62	2810.53	3	1	0	8488.68	1966	0	0	1980-08-04	2810.53	0	0	3	0	0	0	0	0	3	18
1	1980-08-07	240	190	144	64	72	3733.38	7	2	3	11273.8	1967	922.848	32.8354	1980-08-04	2810.53	4	0	3	0	0	0	0	0	7	18
1	1980-08-11	220	190	144	67	75	4070.06	25	2	7	12289.9	1968	1259.53	44.8147	1980-08-04	2810.53	22	0	3	0	0	0	0	0	25	18
1	1980-08-14	220	190	144	68	77	4243.85	25	2	10	12814.4	1969	1433.32	50.9983	1980-08-04	2810.53	22	0	3	0	0	0	0	0	25	18
1	1980-08-18	220	190	144	69	79	4421.27	25	2	14	13349.9	1970	1610.75	57.3111	1980-08-04	2810.53	22	0	3	0	0	0	0	0	25	18
1	1980-08-21	220	190	144	69	79	4421.27	26	2	17	13349.9	1971	1610.75	57.3111	1980-08-04	2810.53	22	0	3	0	0	0	0	1	25	18
1	1980-08-26	200	150	144	69	79	4421.27	100	2	22	13349.9	1972	1610.75	57.3111	1980-08-04	2810.53	22	0	3	0	0	0	60	15	25	18
1	1980-08-29	220	160	144	69	79	4421.27	100	3	25	13349.9	1973	1610.75	57.3111	1980-08-04	2810.53	22	0	3	0	0	0	60	15	25	18
1	1980-08-04	260	210	145	61	52	2577.39	1	1	0	7785.08	1974	0	0	1980-08-04	2577.39	1	0	0	0	0	0	0	0	1	18
1	1980-08-07	240	190	145	74	61	3678.68	5	2	3	11108.8	1975	1101.28	42.7285	1980-08-04	2577.39	5	0	0	0	0	0	0	0	5	18
1	1980-08-11	220	190	145	80	68	4421.27	10	2	7	13349.9	1976	1843.88	71.5404	1980-08-04	2577.39	10	0	0	0	0	0	0	0	10	18
1	1980-08-14	220	190	145	82	70	4663.49	10	2	10	14080.9	1977	2086.1	80.9382	1980-08-04	2577.39	10	0	0	0	0	0	0	0	10	18
1	1980-08-18	220	190	145	82	70	4663.49	20	2	14	14080.9	1978	2086.1	80.9382	1980-08-04	2577.39	10	0	0	0	0	0	10	0	10	18
1	1980-08-21	220	190	145	82	70	4663.49	25	2	17	14080.9	1979	2086.1	80.9382	1980-08-04	2577.39	12	3	0	0	0	0	10	0	15	18
1	1980-08-26	200	150	145	82	70	4663.49	40	2	22	14080.9	1980	2086.1	80.9382	1980-08-04	2577.39	22	3	0	0	0	0	13	2	25	18
1	1980-08-29	220	160	145	82	70	4663.49	57	2	25	14080.9	1981	2086.1	80.9382	1980-08-04	2577.39	22	3	0	0	0	0	20	12	25	18
1	1980-09-02	200	160	145	82	70	4663.49	60	2	29	14080.9	1982	2086.1	80.9382	1980-08-04	2577.39	22	3	0	0	0	0	10	25	25	18
1	1980-09-05	200	170	145	82	70	4663.49	100	2	32	14080.9	1983	2086.1	80.9382	1980-08-04	2577.39	22	3	0	0	0	0	10	65	25	18
1	1980-09-08	220	170	145	82	70	4663.49	100	2	35	14080.9	1984	2086.1	80.9382	1980-08-04	2577.39	22	3	0	0	0	0	0	75	25	18
1	1980-09-11	190	160	145	82	70	4663.49	100	3	38	14080.9	1985	2086.1	80.9382	1980-08-04	2577.39	22	3	0	0	0	0	0	75	25	18
1	1980-08-04	260	210	146	68	58	3204.54	0	1	0	9677.79	1986	0	0	1980-08-04	3204.54	0	0	0	0	0	0	0	0	0	18
1	1980-08-07	240	190	146	70	60	3411.23	2	2	3	10301.6	1987	206.692	6.44999	1980-08-04	3204.54	1	0	1	0	0	0	0	0	2	18
1	1980-08-11	220	190	146	73	64	3788.48	6	2	7	11440.1	1988	583.946	18.2225	1980-08-04	3204.54	5	0	1	0	0	0	0	0	6	18
1	1980-08-14	220	190	146	74	65	3899.9	7	2	10	11776.4	1989	695.366	21.6994	1980-08-04	3204.54	6	0	1	0	0	0	0	0	7	18
1	1980-08-18	220	190	146	75	65	3956.22	7	2	14	11946.4	1990	751.681	23.4568	1980-08-04	3204.54	6	0	1	0	0	0	0	0	7	18
1	1980-08-21	220	190	146	75	65	3956.22	7	2	17	11946.4	1991	751.681	23.4568	1980-08-04	3204.54	6	0	1	0	0	0	0	0	7	18
1	1980-08-26	200	150	146	75	65	3956.22	77	2	22	11946.4	1992	751.681	23.4568	1980-08-04	3204.54	6	0	1	0	0	0	30	40	7	18
1	1980-08-29	220	160	146	75	65	3956.22	100	2	25	11946.4	1993	751.681	23.4568	1980-08-04	3204.54	6	0	1	0	0	0	0	93	7	19
1	1980-09-02	200	160	146	75	65	3956.22	100	3	29	11946.4	1994	751.681	23.4568	1980-08-04	3204.54	6	0	1	0	0	0	0	93	7	19
1	1980-08-04	260	210	147	80	83	5362.89	1	1	0	16191.7	1995	0	0	1980-08-04	5362.89	1	0	0	0	0	0	0	0	1	19
1	1980-08-07	240	190	147	84	89	6041.1	5	2	3	18238.6	1996	678.209	12.6463	1980-08-04	5362.89	5	0	0	0	0	0	0	0	5	19
1	1980-08-11	220	190	147	90	93	6759.68	8	2	7	20407.2	1997	1396.79	26.0454	1980-08-04	5362.89	8	0	0	0	0	0	0	0	8	19
1	1980-08-14	220	190	147	90	95	6908.24	10	2	10	20855.6	1998	1545.35	28.8155	1980-08-04	5362.89	10	0	0	0	0	0	0	0	10	19
1	1980-08-18	220	190	147	92	96	7134.11	11	2	14	21537.2	1999	1771.21	33.0272	1980-08-04	5362.89	10	0	0	0	0	0	1	0	10	19
1	1980-08-21	220	190	147	92	96	7134.11	11	2	17	21537.2	2000	1771.21	33.0272	1980-08-04	5362.89	10	0	0	0	0	0	1	0	10	19
1	1980-08-26	200	150	147	96	93	7210.21	19	2	22	21766.9	2001	1847.31	34.4462	1980-08-04	5362.89	10	0	8	0	0	0	0	1	18	19
1	1980-08-29	220	160	147	96	94	7286.71	26	2	25	21997.8	2002	1923.81	35.8726	1980-08-04	5362.89	10	0	8	0	0	0	0	8	18	19
1	1980-09-02	200	160	147	96	94	7286.71	38	2	29	21997.8	2003	1923.81	35.8726	1980-08-04	5362.89	10	0	8	0	0	0	5	15	18	19
1	1980-09-05	200	170	147	96	94	7286.71	43	2	32	21997.8	2004	1923.81	35.8726	1980-08-04	5362.89	10	0	8	0	0	0	10	15	18	19
1	1980-09-08	220	170	147	96	94	7286.71	58	2	35	21997.8	2005	1923.81	35.8726	1980-08-04	5362.89	10	0	8	0	0	0	20	20	18	19
1	1980-09-11	190	160	147	96	94	7286.71	71	2	38	21997.8	2006	1923.81	35.8726	1980-08-04	5362.89	10	0	8	0	0	0	0	53	18	19
1	1980-09-16	170	140	147	96	94	7286.71	68	2	43	21997.8	2007	1923.81	35.8726	1980-08-04	5362.89	10	0	8	0	0	0	0	50	18	19
1	1980-09-19	180	150	147	96	94	7286.71	68	3	46	21997.8	2008	1923.81	35.8726	1980-08-04	5362.89	10	0	8	0	0	0	0	50	18	19
1	1980-08-07	240	190	148	80	67	4361.73	0	1	0	13170.2	2009	0	0	1980-08-07	4361.73	0	0	0	0	0	0	0	0	0	19
1	1980-08-11	220	190	148	99	84	6759.68	5	2	4	20407.2	2010	2397.95	54.9771	1980-08-07	4361.73	5	0	0	0	0	0	0	0	5	19
1	1980-08-14	220	190	148	100	87	7058.42	7	2	7	21308.8	2011	2696.69	61.8261	1980-08-07	4361.73	7	0	0	0	0	0	0	0	7	19
1	1980-08-18	220	190	148	104	88	7440.92	8	2	11	22463.2	2012	3079.19	70.5956	1980-08-07	4361.73	8	0	0	0	0	0	0	0	8	19
1	1980-08-21	220	190	148	104	88	7440.92	9	2	14	22463.2	2013	3079.19	70.5956	1980-08-07	4361.73	9	0	0	0	0	0	0	0	9	19
1	1980-08-26	200	150	148	104	90	7596.74	10	2	19	22933.5	2014	3235.01	74.1682	1980-08-07	4361.73	9	0	0	0	0	0	1	0	9	19
1	1980-08-29	220	160	148	104	90	7596.74	14	2	22	22933.5	2015	3235.01	74.1682	1980-08-07	4361.73	10	0	0	0	0	0	2	2	10	19
1	1980-09-02	200	160	148	104	90	7596.74	26	2	26	22933.5	2016	3235.01	74.1682	1980-08-07	4361.73	10	0	10	0	0	0	3	3	20	19
1	1980-09-05	200	170	148	104	90	7596.74	30	2	29	22933.5	2017	3235.01	74.1682	1980-08-07	4361.73	10	0	10	0	0	0	2	8	20	19
1	1980-09-08	220	170	148	104	90	7596.74	50	2	32	22933.5	2018	3235.01	74.1682	1980-08-07	4361.73	10	0	10	0	0	0	0	30	20	19
1	1980-09-11	190	160	148	104	90	7596.74	85	2	35	22933.5	2019	3235.01	74.1682	1980-08-07	4361.73	10	0	10	0	0	0	15	50	20	19
1	1980-09-16	170	140	148	104	90	7596.74	95	2	40	22933.5	2020	3235.01	74.1682	1980-08-07	4361.73	10	0	10	0	0	0	0	75	20	19
1	1980-09-19	180	150	148	104	90	7596.74	95	3	43	22933.5	2021	3235.01	74.1682	1980-08-07	4361.73	10	0	10	0	0	0	0	75	20	19
1	1980-08-07	240	190	149	69	59	3307.07	1	1	0	9987.26	2022	0	0	1980-08-07	3307.07	1	0	0	0	0	0	0	0	1	19
1	1980-08-11	220	190	149	73	62	3678.68	3	2	4	11108.8	2023	371.602	11.2366	1980-08-07	3307.07	3	0	0	0	0	0	0	0	3	19
1	1980-08-14	220	190	149	75	64	3899.9	3	2	7	11776.4	2024	592.827	17.926	1980-08-07	3307.07	3	0	0	0	0	0	0	0	3	19
1	1980-08-18	220	190	149	76	65	4012.94	3	2	11	12117.5	2025	705.862	21.344	1980-08-07	3307.07	3	0	0	0	0	0	0	0	3	19
1	1980-08-21	220	190	149	76	65	4012.94	3	2	14	12117.5	2026	705.862	21.344	1980-08-07	3307.07	3	0	0	0	0	0	0	0	3	19
1	1980-08-26	200	150	149	77	65	4070.06	4	2	19	12289.9	2027	762.985	23.0713	1980-08-07	3307.07	3	1	0	0	0	0	0	0	4	19
1	1980-08-29	220	160	149	77	65	4070.06	4	2	22	12289.9	2028	762.985	23.0713	1980-08-07	3307.07	3	1	0	0	0	0	0	0	4	19
1	1980-09-02	200	160	149	77	65	4070.06	4	2	26	12289.9	2029	762.985	23.0713	1980-08-07	3307.07	3	1	0	0	0	0	0	0	4	19
1	1980-09-05	200	170	149	77	66	4127.59	14	2	29	12463.6	2030	820.511	24.8108	1980-08-07	3307.07	3	1	0	0	0	0	10	0	4	19
1	1980-09-08	220	170	149	77	66	4127.59	100	2	32	12463.6	2031	820.511	24.8108	1980-08-07	3307.07	3	1	0	0	0	0	35	61	4	19
1	1980-09-11	190	160	149	77	66	4127.59	100	2	35	12463.6	2032	820.511	24.8108	1980-08-07	3307.07	3	1	0	0	0	0	0	96	4	19
1	1980-09-16	170	140	149	77	66	4127.59	100	3	40	12463.6	2033	820.511	24.8108	1980-08-07	3307.07	3	1	0	0	0	0	0	96	4	19
1	1980-08-07	240	190	150	74	61	3678.68	0	1	0	11108.8	2034	0	0	1980-08-07	3678.68	0	0	0	0	0	0	0	0	0	19
1	1980-08-11	220	190	150	98	81	6467.41	2	2	4	19525.1	2035	2788.73	75.808	1980-08-07	3678.68	2	0	0	0	0	0	0	0	2	19
1	1980-08-14	220	190	150	100	84	6833.76	3	2	7	20630.8	2036	3155.08	85.7668	1980-08-07	3678.68	3	0	0	0	0	0	0	0	3	19
1	1980-08-18	220	190	150	102	85	7058.42	4	2	11	21308.8	2037	3379.74	91.8738	1980-08-07	3678.68	4	0	0	0	0	0	0	0	4	19
1	1980-08-21	220	190	150	104	86	7286.71	5	2	14	21997.8	2038	3608.03	98.0796	1980-08-07	3678.68	4	0	0	0	0	0	1	0	4	19
1	1980-08-26	200	150	150	106	87	7518.63	6	2	19	22697.7	2039	3839.95	104.384	1980-08-07	3678.68	4	0	0	0	0	0	2	0	4	19
1	1980-08-29	220	160	150	107	88	7675.26	7	2	22	23170.4	2040	3996.59	108.642	1980-08-07	3678.68	4	0	0	0	0	0	3	0	4	19
1	1980-09-02	200	160	150	107	88	7675.26	30	2	26	23170.4	2041	3996.59	108.642	1980-08-07	3678.68	5	0	0	0	0	0	25	0	5	19
1	1980-09-05	200	170	150	107	88	7675.26	45	2	29	23170.4	2042	3996.59	108.642	1980-08-07	3678.68	5	0	0	0	0	0	20	20	5	19
1	1980-09-08	220	170	150	107	88	7675.26	65	2	32	23170.4	2043	3996.59	108.642	1980-08-07	3678.68	5	0	0	0	0	0	20	40	5	19
1	1980-09-11	190	160	150	107	88	7675.26	90	2	35	23170.4	2044	3996.59	108.642	1980-08-07	3678.68	5	0	0	0	0	0	20	65	5	19
1	1980-09-16	170	140	150	107	88	7675.26	95	2	40	23170.4	2045	3996.59	108.642	1980-08-07	3678.68	5	0	0	0	0	0	0	90	5	19
1	1980-09-19	180	150	150	107	88	7675.26	95	3	43	23170.4	2046	3996.59	108.642	1980-08-07	3678.68	5	0	0	0	0	0	0	90	5	19
1	1980-08-07	240	190	151	81	73	4787.02	1	1	0	14453.7	2047	0	0	1980-08-07	4787.02	1	0	0	0	0	0	0	0	1	19
1	1980-08-11	220	190	151	95	89	6833.76	2	2	4	20630.8	2048	2046.74	42.7559	1980-08-07	4787.02	2	0	0	0	0	0	0	0	2	19
1	1980-08-14	220	190	151	97	93	7286.71	4	2	7	21997.8	2049	2499.68	52.2179	1980-08-07	4787.02	4	0	0	0	0	0	0	0	4	19
1	1980-08-18	220	190	151	97	94	7363.61	4	2	11	22229.9	2050	2576.59	53.8244	1980-08-07	4787.02	4	0	0	0	0	0	0	0	4	19
1	1980-08-21	220	190	151	97	94	7363.61	4	2	14	22229.9	2051	2576.59	53.8244	1980-08-07	4787.02	4	0	0	0	0	0	0	0	4	19
1	1980-08-26	200	150	151	97	95	7440.92	4	2	19	22463.2	2052	2653.89	55.4394	1980-08-07	4787.02	4	0	0	0	0	0	0	0	4	19
1	1980-08-29	220	160	151	97	95	7440.92	4	2	22	22463.2	2053	2653.89	55.4394	1980-08-07	4787.02	4	0	0	0	0	0	0	0	4	19
1	1980-09-02	200	160	151	97	96	7518.63	4	2	26	22697.7	2054	2731.61	57.0627	1980-08-07	4787.02	4	0	0	0	0	0	0	0	4	20
1	1980-09-05	200	170	151	97	96	7518.63	4	3	29	22697.7	2055	2731.61	57.0627	1980-08-07	4787.02	4	0	0	0	0	0	0	0	4	20
1	1980-08-07	240	190	152	92	73	5495.31	0	1	0	16591.3	2056	0	0	1980-08-07	5495.31	0	0	0	0	0	0	0	0	0	20
1	1980-08-11	220	190	152	113	92	8482.65	2	2	4	25607.2	2057	2987.35	54.3618	1980-08-07	5495.31	2	0	0	0	0	0	0	0	2	20
1	1980-08-14	220	190	152	117	95	9071.85	2	2	7	27385.3	2058	3576.54	65.0836	1980-08-07	5495.31	2	0	0	0	0	0	0	0	2	20
1	1980-08-18	220	190	152	119	97	9417.41	2	2	11	28428.3	2059	3922.1	71.3719	1980-08-07	5495.31	2	0	0	0	0	0	0	0	2	20
1	1980-08-21	220	190	152	119	97	9417.41	2	2	14	28428.3	2060	3922.1	71.3719	1980-08-07	5495.31	2	0	0	0	0	0	0	0	2	20
1	1980-08-26	200	150	152	121	99	9769.43	3	2	19	29490.7	2061	4274.13	77.7778	1980-08-07	5495.31	3	0	0	0	0	0	0	0	3	20
1	1980-08-29	220	160	152	121	99	9769.43	3	2	22	29490.7	2062	4274.13	77.7778	1980-08-07	5495.31	3	0	0	0	0	0	0	0	3	20
1	1980-09-02	200	160	152	121	99	9769.43	9	2	26	29490.7	2063	4274.13	77.7778	1980-08-07	5495.31	3	0	0	0	0	0	5	1	3	20
1	1980-09-05	200	170	152	121	99	9769.43	88	2	29	29490.7	2064	4274.13	77.7778	1980-08-07	5495.31	3	0	0	0	0	0	75	10	3	20
1	1980-09-08	220	170	152	121	99	9769.43	100	2	32	29490.7	2065	4274.13	77.7778	1980-08-07	5495.31	3	0	0	0	0	0	2	95	3	20
1	1980-09-11	190	160	152	121	99	9769.43	100	3	35	29490.7	2066	4274.13	77.7778	1980-08-07	5495.31	3	0	0	0	0	0	2	95	3	20
1	1980-08-07	240	190	153	95	88	6759.68	1	1	0	20407.2	2067	0	0	1980-08-07	6759.68	1	0	0	0	0	0	0	0	1	20
1	1980-08-11	220	190	153	111	103	9243.82	3	2	4	27904.4	2068	2484.14	36.7494	1980-08-07	6759.68	3	0	0	0	0	0	0	0	3	20
1	1980-08-14	220	190	153	114	106	9769.43	4	2	7	29490.7	2069	3009.75	44.5251	1980-08-07	6759.68	4	0	0	0	0	0	0	0	4	20
1	1980-08-18	220	190	153	116	108	10127.9	4	2	11	30572.6	2070	3368.23	49.8283	1980-08-07	6759.68	4	0	0	0	0	0	0	0	4	20
1	1980-08-21	220	190	153	116	108	10127.9	4	2	14	30572.6	2071	3368.23	49.8283	1980-08-07	6759.68	4	0	0	0	0	0	0	0	4	20
1	1980-08-26	200	150	153	117	109	10309.6	4	2	19	31120.8	2072	3549.9	52.5158	1980-08-07	6759.68	4	0	0	0	0	0	0	0	4	20
1	1980-08-29	220	160	153	117	109	10309.6	4	2	22	31120.8	2073	3549.9	52.5158	1980-08-07	6759.68	4	0	0	0	0	0	0	0	4	20
1	1980-09-02	200	160	153	117	109	10309.6	8	2	26	31120.8	2074	3549.9	52.5158	1980-08-07	6759.68	4	0	0	0	0	0	3	1	4	20
1	1980-09-05	200	170	153	117	110	10401	10	2	29	31396.8	2075	3641.33	53.8684	1980-08-07	6759.68	4	0	0	0	0	0	5	1	4	20
1	1980-09-08	220	170	153	117	110	10401	34	2	32	31396.8	2076	3641.33	53.8684	1980-08-07	6759.68	4	0	0	0	0	0	20	10	4	20
1	1980-09-11	190	160	153	118	110	10492.9	34	2	35	31673.9	2077	3733.18	55.2271	1980-08-07	6759.68	4	0	0	0	0	0	10	20	4	20
1	1980-09-16	170	140	153	118	110	10492.9	44	2	40	31673.9	2078	3733.18	55.2271	1980-08-07	6759.68	4	0	0	0	0	0	10	30	4	20
1	1980-09-19	180	150	153	118	110	10492.9	74	2	43	31673.9	2079	3733.18	55.2271	1980-08-07	6759.68	4	0	0	0	0	0	20	50	4	20
1	1980-09-22	210	150	153	118	110	10492.9	84	2	46	31673.9	2080	3733.18	55.2271	1980-08-07	6759.68	4	0	0	0	0	0	5	75	4	20
1	1980-09-25	200	160	153	118	110	10492.9	84	3	49	31673.9	2081	3733.18	55.2271	1980-08-07	6759.68	4	0	0	0	0	0	5	75	4	20
1	1980-08-11	220	190	154	80	65	4243.85	0	1	0	12814.4	2082	0	0	1980-08-11	4243.85	0	0	0	0	0	0	0	0	0	20
1	1980-08-14	220	190	154	100	82	6686.01	5	2	3	20184.9	2083	2442.16	57.5458	1980-08-11	4243.85	5	0	0	0	0	0	0	0	5	20
1	1980-08-18	220	190	154	101	89	7286.71	12	2	7	21997.8	2084	3042.86	71.7004	1980-08-11	4243.85	12	0	0	0	0	0	0	0	12	20
1	1980-08-21	220	190	154	101	92	7518.63	30	2	10	22697.7	2085	3274.78	77.1653	1980-08-11	4243.85	30	0	0	0	0	0	0	0	30	20
1	1980-08-26	200	150	154	101	92	7518.63	42	2	15	22697.7	2086	3274.78	77.1653	1980-08-11	4243.85	40	0	0	0	0	0	2	0	40	20
1	1980-08-29	220	160	154	103	92	7675.26	50	2	18	23170.4	2087	3431.41	80.8561	1980-08-11	4243.85	45	0	0	0	0	0	1	4	45	20
1	1980-09-02	200	160	154	103	92	7675.26	55	2	22	23170.4	2088	3431.41	80.8561	1980-08-11	4243.85	45	0	0	0	0	0	2	8	45	20
1	1980-09-05	200	170	154	104	92	7754.19	55	2	25	23408.6	2089	3510.34	82.7158	1980-08-11	4243.85	45	0	0	0	0	0	5	5	45	20
1	1980-09-08	220	170	154	104	92	7754.19	57	2	28	23408.6	2090	3510.34	82.7158	1980-08-11	4243.85	45	0	0	0	0	0	5	7	45	20
1	1980-09-11	190	160	154	104	92	7754.19	60	2	31	23408.6	2091	3510.34	82.7158	1980-08-11	4243.85	45	0	0	0	0	0	5	10	45	20
1	1980-09-16	170	140	154	104	92	7754.19	66	2	36	23408.6	2092	3510.34	82.7158	1980-08-11	4243.85	50	0	0	0	0	0	2	14	50	20
1	1980-09-19	180	150	154	104	92	7754.19	90	2	39	23408.6	2093	3510.34	82.7158	1980-08-11	4243.85	50	0	0	0	0	0	25	15	50	20
1	1980-09-22	210	150	154	104	92	7754.19	95	2	42	23408.6	2094	3510.34	82.7158	1980-08-11	4243.85	50	0	0	0	0	0	1	44	50	20
1	1980-09-25	200	160	154	104	92	7754.19	95	3	45	23408.6	2095	3510.34	82.7158	1980-08-11	4243.85	50	0	0	0	0	0	1	44	50	20
1	1980-08-11	220	190	155	78	63	4012.94	1	1	0	12117.5	2096	0	0	1980-08-11	4012.94	1	0	0	0	0	0	0	0	1	20
1	1980-08-14	220	190	155	85	68	4725.06	3	2	3	14266.7	2097	712.119	17.7456	1980-08-11	4012.94	3	0	0	0	0	0	0	0	3	20
1	1980-08-18	220	190	155	89	70	5102.91	3	2	7	15407.1	2098	1089.98	27.1616	1980-08-11	4012.94	3	0	0	0	0	0	0	0	3	20
1	1980-08-21	220	190	155	89	70	5102.91	3	2	10	15407.1	2099	1089.98	27.1616	1980-08-11	4012.94	3	0	0	0	0	0	0	0	3	20
1	1980-08-26	200	150	155	90	72	5297.29	3	2	15	15993.7	2100	1284.36	32.0054	1980-08-11	4012.94	3	0	0	0	0	0	0	0	3	20
1	1980-08-29	220	160	155	90	72	5297.29	4	2	18	15993.7	2101	1284.36	32.0054	1980-08-11	4012.94	4	0	0	0	0	0	0	0	4	20
1	1980-09-02	200	160	155	90	72	5297.29	6	2	22	15993.7	2102	1284.36	32.0054	1980-08-11	4012.94	4	0	0	0	0	0	2	0	4	20
1	1980-09-05	200	170	155	90	73	5362.89	9	2	25	16191.7	2103	1349.96	33.6402	1980-08-11	4012.94	5	0	0	0	0	0	2	2	5	20
1	1980-09-08	220	170	155	91	73	5428.9	12	2	28	16390.9	2104	1415.96	35.2849	1980-08-11	4012.94	6	0	0	0	0	0	3	3	6	20
1	1980-09-11	190	160	155	91	73	5428.9	50	2	31	16390.9	2105	1415.96	35.2849	1980-08-11	4012.94	15	0	0	0	0	0	25	10	15	20
1	1980-09-16	170	140	155	91	73	5428.9	50	3	36	16390.9	2106	1415.96	35.2849	1980-08-11	4012.94	15	0	0	0	0	0	25	10	15	20
1	1980-08-11	220	190	156	106	82	7134.11	1	1	0	21537.2	2107	0	0	1980-08-11	7134.11	1	0	0	0	0	0	0	0	1	20
1	1980-08-14	220	190	156	111	87	7913.24	3	2	3	23888.7	2108	779.133	10.9212	1980-08-11	7134.11	3	0	0	0	0	0	0	0	3	20
1	1980-08-18	220	190	156	111	87	7913.24	3	3	7	23888.7	2109	779.133	10.9212	1980-08-11	7134.11	3	0	0	0	0	0	0	0	3	20
1	1980-08-11	220	190	157	81	71	4663.49	3	1	0	14080.9	2110	0	0	1980-08-11	4663.49	3	0	0	0	0	0	0	0	3	20
1	1980-08-14	220	190	157	88	77	5495.31	7	2	3	16591.3	2111	831.815	17.8367	1980-08-11	4663.49	7	0	0	0	0	0	0	0	7	20
1	1980-08-18	220	190	157	92	82	6111.14	40	2	7	18449.9	2112	1447.65	31.0422	1980-08-11	4663.49	40	0	0	0	0	0	0	0	40	20
1	1980-08-21	220	190	157	92	82	6111.14	40	2	10	18449.9	2113	1447.65	31.0422	1980-08-11	4663.49	40	0	0	0	0	0	0	0	40	20
1	1980-08-26	200	150	157	93	86	6467.41	50	2	15	19525.1	2114	1803.91	38.6816	1980-08-11	4663.49	50	0	0	0	0	0	0	0	50	20
1	1980-08-29	220	160	157	93	86	6467.41	50	2	18	19525.1	2115	1803.91	38.6816	1980-08-11	4663.49	50	0	0	0	0	0	0	0	50	21
1	1980-09-02	200	160	157	94	86	6539.87	53	2	22	19743.8	2116	1876.38	40.2355	1980-08-11	4663.49	50	0	0	0	0	0	3	0	50	21
1	1980-09-05	200	170	157	95	86	6612.74	55	2	25	19963.7	2117	1949.24	41.798	1980-08-11	4663.49	50	0	0	0	0	0	5	0	50	21
1	1980-09-08	220	170	157	95	86	6612.74	58	2	28	19963.7	2118	1949.24	41.798	1980-08-11	4663.49	50	0	0	0	0	0	5	3	50	21
1	1980-09-11	190	160	157	95	86	6612.74	60	2	31	19963.7	2119	1949.24	41.798	1980-08-11	4663.49	50	0	0	0	0	0	5	5	50	21
1	1980-09-16	170	140	157	95	86	6612.74	68	2	36	19963.7	2120	1949.24	41.798	1980-08-11	4663.49	55	0	0	0	0	0	5	8	55	21
1	1980-09-19	180	150	157	95	86	6612.74	73	2	39	19963.7	2121	1949.24	41.798	1980-08-11	4663.49	55	0	0	0	0	0	10	8	55	21
1	1980-09-22	210	150	157	95	86	6612.74	100	2	42	19963.7	2122	1949.24	41.798	1980-08-11	4663.49	55	0	0	0	0	0	1	44	55	21
1	1980-09-25	200	160	157	95	86	6612.74	100	3	45	19963.7	2123	1949.24	41.798	1980-08-11	4663.49	55	0	0	0	0	0	1	44	55	21
1	1980-08-11	220	190	158	103	79	6686.01	2	1	0	20184.9	2124	0	0	1980-08-11	6686.01	2	0	0	0	0	0	0	0	2	21
1	1980-08-14	220	190	158	106	85	7363.61	2	2	3	22229.9	2125	677.603	10.1346	1980-08-11	6686.01	2	0	0	0	0	0	0	0	2	21
1	1980-08-18	220	190	158	110	88	7913.24	2	2	7	23888.7	2126	1227.23	18.3553	1980-08-11	6686.01	2	0	0	0	0	0	0	0	2	21
1	1980-08-21	220	190	158	111	89	8073.91	2	2	10	24373.6	2127	1387.91	20.7584	1980-08-11	6686.01	2	0	0	0	0	0	0	0	2	21
1	1980-08-26	200	150	158	111	89	8073.91	3	2	15	24373.6	2128	1387.91	20.7584	1980-08-11	6686.01	3	0	0	0	0	0	0	0	3	21
1	1980-08-29	220	160	158	113	90	8317.95	3	2	18	25110.1	2129	1631.94	24.4083	1980-08-11	6686.01	3	0	0	0	0	0	0	0	3	21
1	1980-09-02	200	160	158	113	90	8317.95	3	2	22	25110.1	2130	1631.94	24.4083	1980-08-11	6686.01	3	0	0	0	0	0	0	0	3	21
1	1980-09-05	200	170	158	113	90	8317.95	4	2	25	25110.1	2131	1631.94	24.4083	1980-08-11	6686.01	3	0	0	0	0	0	1	0	3	21
1	1980-09-08	220	170	158	113	90	8317.95	5	2	28	25110.1	2132	1631.94	24.4083	1980-08-11	6686.01	3	0	0	0	0	0	1	1	3	21
1	1980-09-11	190	160	158	113	91	8400.1	8	2	31	25358	2133	1714.09	25.637	1980-08-11	6686.01	3	0	0	0	0	0	3	2	3	21
1	1980-09-16	170	140	158	113	91	8400.1	36	2	36	25358	2134	1714.09	25.637	1980-08-11	6686.01	3	0	0	0	0	0	25	8	3	21
1	1980-09-19	180	150	158	113	91	8400.1	63	2	39	25358	2135	1714.09	25.637	1980-08-11	6686.01	3	0	0	0	0	0	25	35	3	21
1	1980-09-22	210	150	158	113	91	8400.1	93	2	42	25358	2136	1714.09	25.637	1980-08-11	6686.01	3	0	0	0	0	0	10	80	3	21
1	1980-09-25	200	160	158	113	91	8400.1	100	2	45	25358	2137	1714.09	25.637	1980-08-11	6686.01	3	0	0	0	0	0	0	97	3	21
1	1980-09-29	200	150	158	113	91	8400.1	100	3	49	25358	2138	1714.09	25.637	1980-08-11	6686.01	3	0	0	0	0	0	0	97	3	21
1	1980-08-11	220	190	159	80	65	4243.85	1	1	0	12814.4	2139	0	0	1980-08-11	4243.85	1	0	0	0	0	0	0	0	1	21
1	1980-08-14	220	190	159	83	68	4602.33	3	2	3	13896.3	2140	358.482	8.44709	1980-08-11	4243.85	3	0	0	0	0	0	0	0	3	21
1	1980-08-18	220	190	159	86	71	4975.35	3	2	7	15022.1	2141	731.496	17.2366	1980-08-11	4243.85	3	0	0	0	0	0	0	0	3	21
1	1980-08-21	220	190	159	86	71	4975.35	3	2	10	15022.1	2142	731.496	17.2366	1980-08-11	4243.85	3	0	0	0	0	0	0	0	3	21
1	1980-08-26	200	150	159	87	71	5038.93	3	2	15	15214	2143	795.078	18.7348	1980-08-11	4243.85	3	0	0	0	0	0	0	0	3	21
1	1980-08-29	220	160	159	89	72	5232.1	4	2	18	15797	2144	988.247	23.2866	1980-08-11	4243.85	4	0	0	0	0	0	0	0	4	21
1	1980-09-02	200	160	159	90	72	5297.29	16	2	22	15993.7	2145	1053.44	24.8228	1980-08-11	4243.85	4	0	0	0	0	0	10	2	4	21
1	1980-09-05	200	170	159	90	72	5297.29	21	2	25	15993.7	2146	1053.44	24.8228	1980-08-11	4243.85	4	0	0	0	0	0	12	5	4	21
1	1980-09-08	220	170	159	90	72	5297.29	30	2	28	15993.7	2147	1053.44	24.8228	1980-08-11	4243.85	4	0	0	0	0	0	6	20	4	21
1	1980-09-11	190	160	159	90	72	5297.29	59	2	31	15993.7	2148	1053.44	24.8228	1980-08-11	4243.85	4	0	0	0	0	0	30	25	4	21
1	1980-09-16	170	140	159	90	72	5297.29	59	3	36	15993.7	2149	1053.44	24.8228	1980-08-11	4243.85	4	0	0	0	0	0	30	25	4	21
1	1980-08-11	220	190	160	90	41	3463.91	0	1	0	10460.6	2150	0	0	1980-08-11	3463.91	0	0	0	0	0	0	0	0	0	21
1	1980-08-14	220	190	160	59	50	2398.15	5	2	3	7244.13	2151	-1065.76	-30.7674	1980-08-11	3463.91	5	0	0	0	0	0	0	0	5	21
1	1980-08-18	220	190	160	63	55	2810.53	8	2	7	8488.68	2152	-653.381	-18.8625	1980-08-11	3463.91	8	0	0	0	0	0	0	0	8	21
1	1980-08-21	220	190	160	63	56	2858.37	12	2	10	8633.06	2153	-605.543	-17.4815	1980-08-11	3463.91	12	0	0	0	0	0	0	0	12	21
1	1980-08-26	200	150	160	63	56	2858.37	20	2	15	8633.06	2154	-605.543	-17.4815	1980-08-11	3463.91	20	0	0	0	0	0	0	0	20	21
1	1980-08-29	220	160	160	63	59	3004.3	30	2	18	9073.49	2155	-459.607	-13.2685	1980-08-11	3463.91	30	0	0	0	0	0	0	0	30	21
1	1980-09-02	200	160	160	63	60	3053.76	30	2	22	9222.74	2156	-410.155	-11.8408	1980-08-11	3463.91	30	0	0	0	0	0	0	0	30	21
1	1980-09-05	200	170	160	63	60	3053.76	30	2	25	9222.74	2157	-410.155	-11.8408	1980-08-11	3463.91	30	0	0	0	0	0	0	0	30	21
1	1980-09-08	220	170	160	63	60	3053.76	45	2	28	9222.74	2158	-410.155	-11.8408	1980-08-11	3463.91	35	0	0	0	0	0	8	2	35	21
1	1980-09-11	190	160	160	63	60	3053.76	68	2	31	9222.74	2159	-410.155	-11.8408	1980-08-11	3463.91	35	0	0	0	0	0	25	8	35	21
1	1980-09-16	170	140	160	63	60	3053.76	68	3	36	9222.74	2160	-410.155	-11.8408	1980-08-11	3463.91	35	0	0	0	0	0	25	8	35	21
1	1980-08-11	220	190	161	82	67	4481.22	0	1	0	13530.8	2161	0	0	1980-08-11	4481.22	0	0	0	0	0	0	0	0	0	21
1	1980-08-14	220	190	161	105	87	7440.92	3	2	3	22463.2	2162	2959.69	66.0466	1980-08-11	4481.22	3	0	0	0	0	0	0	0	3	21
1	1980-08-18	220	190	161	112	94	8565.61	5	2	7	25857.5	2163	4084.39	91.1445	1980-08-11	4481.22	5	0	0	0	0	0	0	0	5	21
1	1980-08-21	220	190	161	112	94	8565.61	5	2	10	25857.5	2164	4084.39	91.1445	1980-08-11	4481.22	5	0	0	0	0	0	0	0	5	21
1	1980-08-26	200	150	161	116	97	9157.63	7	2	15	27644.2	2165	4676.41	104.356	1980-08-11	4481.22	7	0	0	0	0	0	0	0	7	21
1	1980-08-29	220	160	161	117	99	9417.41	10	2	18	28428.3	2166	4936.19	110.153	1980-08-11	4481.22	8	0	0	0	0	0	2	0	8	21
1	1980-09-02	200	160	161	118	100	9592.61	17	2	22	28957	2167	5111.39	114.062	1980-08-11	4481.22	15	0	0	0	0	0	2	0	15	21
1	1980-09-05	200	170	161	118	100	9592.61	17	2	25	28957	2168	5111.39	114.062	1980-08-11	4481.22	15	0	0	0	0	0	2	0	15	21
1	1980-09-08	220	170	161	118	100	9592.61	17	2	28	28957	2169	5111.39	114.062	1980-08-11	4481.22	15	0	0	0	0	0	0	2	15	21
1	1980-09-11	190	160	161	119	100	9680.82	28	2	31	29223.2	2170	5199.6	116.031	1980-08-11	4481.22	18	0	0	0	0	0	5	5	18	21
1	1980-09-16	170	140	161	119	100	9680.82	28	2	36	29223.2	2171	5199.6	116.031	1980-08-11	4481.22	18	0	0	0	0	0	2	8	18	21
1	1980-09-19	180	150	161	120	100	9769.43	43	2	39	29490.7	2172	5288.21	118.008	1980-08-11	4481.22	18	0	0	0	0	0	10	15	18	21
1	1980-09-22	210	150	161	120	100	9769.43	68	2	42	29490.7	2173	5288.21	118.008	1980-08-11	4481.22	18	0	0	0	0	0	10	40	18	21
1	1980-09-25	200	160	161	120	100	9769.43	100	2	45	29490.7	2174	5288.21	118.008	1980-08-11	4481.22	18	0	0	0	0	0	10	72	18	21
1	1980-09-29	200	150	161	120	100	9769.43	100	3	49	29490.7	2175	5288.21	118.008	1980-08-11	4481.22	18	0	0	0	0	0	10	72	18	21
1	1980-08-14	220	190	162	92	71	5362.89	0	1	0	16191.7	2176	0	0	1980-08-14	5362.89	0	0	0	0	0	0	0	0	0	22
1	1980-08-18	220	190	162	115	90	8482.65	0	2	4	25607.2	2177	3119.76	58.1731	1980-08-14	5362.89	0	0	0	0	0	0	0	0	0	22
1	1980-08-21	220	190	162	121	95	9417.41	1	2	7	28428.3	2178	4054.52	75.6031	1980-08-14	5362.89	1	0	0	0	0	0	0	0	1	22
1	1980-08-26	200	150	162	126	98	10127.9	1	2	12	30572.6	2179	4765.02	88.8517	1980-08-14	5362.89	1	0	0	0	0	0	0	0	1	22
1	1980-08-29	220	160	162	126	98	10127.9	1	2	15	30572.6	2180	4765.02	88.8517	1980-08-14	5362.89	1	0	0	0	0	0	0	0	1	22
1	1980-09-02	200	160	162	128	99	10401	1	2	19	31396.8	2181	5038.12	93.9441	1980-08-14	5362.89	1	0	0	0	0	0	0	0	1	22
1	1980-09-05	200	170	162	128	100	10492.9	1	2	22	31673.9	2182	5129.96	95.6566	1980-08-14	5362.89	1	0	0	0	0	0	0	0	1	22
1	1980-09-08	220	170	162	128	100	10492.9	1	2	25	31673.9	2183	5129.96	95.6566	1980-08-14	5362.89	1	0	0	0	0	0	0	0	1	22
1	1980-09-11	190	160	162	128	100	10492.9	1	2	28	31673.9	2184	5129.96	95.6566	1980-08-14	5362.89	1	0	0	0	0	0	0	0	1	22
1	1980-09-16	170	140	162	129	100	10585.1	1	2	33	31952.3	2185	5222.21	97.3766	1980-08-14	5362.89	1	0	0	0	0	0	0	0	1	22
1	1980-09-19	180	150	162	129	100	10585.1	1	2	36	31952.3	2186	5222.21	97.3766	1980-08-14	5362.89	1	0	0	0	0	0	0	0	1	22
1	1980-09-22	210	150	162	129	100	10585.1	2	2	39	31952.3	2187	5222.21	97.3766	1980-08-14	5362.89	2	0	0	0	0	0	0	0	2	22
1	1980-09-25	200	160	162	129	100	10585.1	3	2	42	31952.3	2188	5222.21	97.3766	1980-08-14	5362.89	3	0	0	0	0	0	0	0	3	22
1	1980-09-29	200	150	162	129	100	10585.1	15	2	46	31952.3	2189	5222.21	97.3766	1980-08-14	5362.89	3	0	0	0	0	0	10	2	3	22
1	1980-10-02	180	140	162	129	100	10585.1	32	2	49	31952.3	2190	5222.21	97.3766	1980-08-14	5362.89	3	0	0	0	0	2	25	2	3	22
1	1980-10-06	160	120	162	129	100	10585.1	67	2	53	31952.3	2191	5222.21	97.3766	1980-08-14	5362.89	3	0	0	0	0	2	25	37	3	22
1	1980-10-09	140	70	162	129	100	10585.1	100	2	56	31952.3	2192	5222.21	97.3766	1980-08-14	5362.89	3	0	0	0	0	2	10	85	3	22
1	1980-10-13	130	80	162	129	100	10585.1	100	3	60	31952.3	2193	5222.21	97.3766	1980-08-14	5362.89	3	0	0	0	0	2	10	85	3	22
1	1980-08-14	220	190	163	75	60	3678.68	0	1	0	11108.8	2194	0	0	1980-08-14	3678.68	0	0	0	0	0	0	0	0	0	22
1	1980-08-18	220	190	163	98	81	6467.41	1	2	4	19525.1	2195	2788.73	75.808	1980-08-14	3678.68	1	0	0	0	0	0	0	0	1	22
1	1980-08-21	220	190	163	104	85	7210.21	2	2	7	21766.9	2196	3531.53	96	1980-08-14	3678.68	2	0	0	0	0	0	0	0	2	22
1	1980-08-26	200	150	163	104	86	7286.71	3	2	12	21997.8	2197	3608.03	98.0796	1980-08-14	3678.68	2	1	0	0	0	0	0	0	3	22
1	1980-08-29	220	160	163	105	87	7440.92	3	2	15	22463.2	2198	3762.24	102.272	1980-08-14	3678.68	2	1	0	0	0	0	0	0	3	22
1	1980-09-02	200	160	163	107	87	7596.74	3	2	19	22933.5	2199	3918.07	106.508	1980-08-14	3678.68	2	1	0	0	0	0	0	0	3	22
1	1980-09-05	200	170	163	107	88	7675.26	3	2	22	23170.4	2200	3996.59	108.642	1980-08-14	3678.68	2	1	0	0	0	0	0	0	3	22
1	1980-09-08	220	170	163	107	88	7675.26	3	2	25	23170.4	2201	3996.59	108.642	1980-08-14	3678.68	2	1	0	0	0	0	0	0	3	22
1	1980-09-11	190	160	163	107	88	7675.26	3	2	28	23170.4	2202	3996.59	108.642	1980-08-14	3678.68	2	1	0	0	0	0	0	0	3	22
1	1980-09-16	170	140	163	107	88	7675.26	3	2	33	23170.4	2203	3996.59	108.642	1980-08-14	3678.68	2	1	0	0	0	0	0	0	3	22
1	1980-09-19	180	150	163	107	88	7675.26	3	2	36	23170.4	2204	3996.59	108.642	1980-08-14	3678.68	2	1	0	0	0	0	0	0	3	22
1	1980-09-22	210	150	163	107	88	7675.26	3	2	39	23170.4	2205	3996.59	108.642	1980-08-14	3678.68	2	1	0	0	0	0	0	0	3	22
1	1980-09-25	200	160	163	108	88	7754.19	4	2	42	23408.6	2206	4075.51	110.787	1980-08-14	3678.68	2	1	0	0	0	0	0	1	3	22
1	1980-09-29	200	150	163	108	88	7754.19	27	2	46	23408.6	2207	4075.51	110.787	1980-08-14	3678.68	2	1	0	0	0	0	20	4	3	22
1	1980-10-02	180	140	163	108	88	7754.19	50	2	49	23408.6	2208	4075.51	110.787	1980-08-14	3678.68	2	1	0	0	0	2	30	15	3	22
1	1980-10-06	160	120	163	108	88	7754.19	100	2	53	23408.6	2209	4075.51	110.787	1980-08-14	3678.68	2	1	0	0	0	2	34	61	3	22
1	1980-10-09	140	70	163	108	88	7754.19	100	2	56	23408.6	2210	4075.51	110.787	1980-08-14	3678.68	4	1	0	0	0	3	1	91	5	22
1	1980-10-13	130	80	163	108	88	7754.19	100	3	60	23408.6	2211	4075.51	110.787	1980-08-14	3678.68	4	1	0	0	0	3	1	91	5	22
1	1980-08-14	220	190	164	86	69	4849.39	0	1	0	14642	2212	0	0	1980-08-14	4849.39	0	0	0	0	0	0	0	0	0	22
1	1980-08-18	220	190	164	119	97	9417.41	1	2	4	28428.3	2213	4568.02	94.1977	1980-08-14	4849.39	1	0	0	0	0	0	0	0	1	22
1	1980-08-21	220	190	164	120	99	9680.82	3	2	7	29223.2	2214	4831.43	99.6296	1980-08-14	4849.39	3	0	0	0	0	0	0	0	3	22
1	1980-08-26	200	150	164	124	103	10401	4	2	12	31396.8	2215	5551.62	114.481	1980-08-14	4849.39	4	0	0	0	0	0	0	0	4	22
1	1980-08-29	220	160	164	126	103	10585.1	6	2	15	31952.3	2216	5735.71	118.277	1980-08-14	4849.39	4	0	2	0	0	0	0	0	6	22
1	1980-09-02	200	160	164	130	104	11052.4	7	2	19	33362.6	2217	6202.98	127.913	1980-08-14	4849.39	5	0	2	0	0	0	0	0	7	22
1	1980-09-05	200	170	164	130	105	11147	9	2	22	33648.3	2218	6297.65	129.865	1980-08-14	4849.39	5	0	2	0	0	0	1	1	7	22
1	1980-09-08	220	170	164	130	105	11147	10	2	25	33648.3	2219	6297.65	129.865	1980-08-14	4849.39	6	0	2	0	0	0	0	2	8	22
1	1980-09-11	190	160	164	130	105	11147	15	2	28	33648.3	2220	6297.65	129.865	1980-08-14	4849.39	6	0	2	0	0	0	5	2	8	22
1	1980-09-16	170	140	164	130	105	11147	19	2	33	33648.3	2221	6297.65	129.865	1980-08-14	4849.39	8	0	2	0	0	0	5	4	10	22
1	1980-09-19	180	150	164	130	105	11147	20	2	36	33648.3	2222	6297.65	129.865	1980-08-14	4849.39	8	0	2	0	0	0	5	5	10	22
1	1980-09-22	210	150	164	130	105	11147	43	2	39	33648.3	2223	6297.65	129.865	1980-08-14	4849.39	8	0	2	0	0	0	8	25	10	22
1	1980-09-25	200	160	164	130	105	11147	70	2	42	33648.3	2224	6297.65	129.865	1980-08-14	4849.39	8	0	2	0	0	0	20	40	10	22
1	1980-09-29	200	150	164	130	105	11147	92	2	46	33648.3	2225	6297.65	129.865	1980-08-14	4849.39	8	0	2	0	0	0	5	77	10	22
1	1980-10-02	180	140	164	130	105	11147	92	3	49	33648.3	2226	6297.65	129.865	1980-08-14	4849.39	8	0	2	0	0	0	5	77	10	22
1	1980-08-14	220	190	165	87	71	5038.93	0	1	0	15214	2227	0	0	1980-08-14	5038.93	0	0	0	0	0	0	0	0	0	22
1	1980-08-18	220	190	165	108	88	7754.19	4	2	4	23408.6	2228	2715.26	53.8856	1980-08-14	5038.93	4	0	0	0	0	0	0	0	4	22
1	1980-08-21	220	190	165	109	89	7913.24	4	2	7	23888.7	2229	2874.31	57.0421	1980-08-14	5038.93	4	0	0	0	0	0	0	0	4	22
1	1980-08-26	200	150	165	109	89	7913.24	15	2	12	23888.7	2230	2874.31	57.0421	1980-08-14	5038.93	10	0	0	0	0	0	5	0	10	22
1	1980-08-29	220	160	165	110	90	8073.91	25	2	15	24373.6	2231	3034.98	60.2307	1980-08-14	5038.93	10	0	0	0	0	0	15	0	10	22
1	1980-09-02	200	160	165	110	90	8073.91	40	2	19	24373.6	2232	3034.98	60.2307	1980-08-14	5038.93	15	0	0	0	0	0	25	0	15	22
1	1980-09-05	200	170	165	110	92	8236.2	75	2	22	24863.4	2233	3197.27	63.4514	1980-08-14	5038.93	15	0	0	0	0	0	50	10	15	22
1	1980-09-08	220	170	165	110	92	8236.2	78	2	25	24863.4	2234	3197.27	63.4514	1980-08-14	5038.93	15	0	0	0	0	0	33	30	15	22
1	1980-09-11	190	160	165	110	92	8236.2	95	2	28	24863.4	2235	3197.27	63.4514	1980-08-14	5038.93	15	0	0	0	0	0	5	75	15	22
1	1980-09-16	170	140	165	110	92	8236.2	95	2	33	24863.4	2236	3197.27	63.4514	1980-08-14	5038.93	15	0	0	0	0	0	0	80	15	22
1	1980-09-19	180	150	165	110	92	8236.2	95	3	36	24863.4	2237	3197.27	63.4514	1980-08-14	5038.93	15	0	0	0	0	0	0	80	15	23
1	1980-08-14	220	190	166	89	71	5167.3	0	1	0	15601.4	2238	0	0	1980-08-14	5167.3	0	0	0	0	0	0	0	0	0	23
1	1980-08-18	220	190	166	106	84	7286.71	3	2	4	21997.8	2239	2119.4	41.0156	1980-08-14	5167.3	3	0	0	0	0	0	0	0	3	23
1	1980-08-21	220	190	166	108	86	7596.74	3	2	7	22933.5	2240	2429.44	47.0156	1980-08-14	5167.3	3	0	0	0	0	0	0	0	3	23
1	1980-08-26	200	150	166	108	87	7675.26	3	2	12	23170.4	2241	2507.96	48.5352	1980-08-14	5167.3	3	0	0	0	0	0	0	0	3	23
1	1980-08-29	220	160	166	109	90	7993.37	4	2	15	24130.5	2242	2826.07	54.6914	1980-08-14	5167.3	4	0	0	0	0	0	0	0	4	23
1	1980-09-02	200	160	166	109	90	7993.37	6	2	19	24130.5	2243	2826.07	54.6914	1980-08-14	5167.3	4	0	0	0	0	0	1	1	4	23
1	1980-09-05	200	170	166	109	90	7993.37	14	2	22	24130.5	2244	2826.07	54.6914	1980-08-14	5167.3	4	0	0	0	0	0	10	0	4	23
1	1980-09-08	220	170	166	109	90	7993.37	15	2	25	24130.5	2245	2826.07	54.6914	1980-08-14	5167.3	4	0	0	0	0	0	5	6	4	23
1	1980-09-11	190	160	166	110	90	8073.91	23	2	28	24373.6	2246	2906.61	56.25	1980-08-14	5167.3	5	0	0	0	0	0	8	10	5	23
1	1980-09-16	170	140	166	110	90	8073.91	48	2	33	24373.6	2247	2906.61	56.25	1980-08-14	5167.3	5	0	0	0	0	0	20	23	5	23
1	1980-09-19	180	150	166	110	90	8073.91	100	2	36	24373.6	2248	2906.61	56.25	1980-08-14	5167.3	5	0	0	0	0	0	6	89	5	23
1	1980-09-22	210	150	166	110	90	8073.91	100	2	39	24373.6	2249	2906.61	56.25	1980-08-14	5167.3	5	0	0	0	0	0	0	95	5	23
1	1980-09-25	200	160	166	110	90	8073.91	100	3	42	24373.6	2250	2906.61	56.25	1980-08-14	5167.3	5	0	0	0	0	0	0	95	5	23
1	1980-08-14	220	190	167	84	72	4912.17	0	1	0	14831.4	2251	0	0	1980-08-14	4912.17	0	0	0	0	0	0	0	0	0	23
1	1980-08-18	220	190	167	90	84	6111.14	4	2	4	18449.9	2252	1198.98	24.4083	1980-08-14	4912.17	4	0	0	0	0	0	0	0	4	23
1	1980-08-21	220	190	167	102	90	7440.92	5	2	7	22463.2	2253	2528.75	51.4793	1980-08-14	4912.17	5	0	0	0	0	0	0	0	5	23
1	1980-08-26	200	150	167	104	90	7596.74	7	2	12	22933.5	2254	2684.58	54.6515	1980-08-14	4912.17	7	0	0	0	0	0	0	0	7	23
1	1980-08-29	220	160	167	104	90	7596.74	10	2	15	22933.5	2255	2684.58	54.6515	1980-08-14	4912.17	7	3	0	0	0	0	0	0	10	23
1	1980-09-02	200	160	167	107	90	7833.51	12	2	19	23648	2256	2921.34	59.4716	1980-08-14	4912.17	7	3	0	0	0	0	1	1	10	23
1	1980-09-05	200	170	167	107	90	7833.51	15	2	22	23648	2257	2921.34	59.4716	1980-08-14	4912.17	8	3	0	0	0	0	2	2	11	23
1	1980-09-08	220	170	167	107	91	7913.24	36	2	25	23888.7	2258	3001.07	61.0947	1980-08-14	4912.17	8	3	0	0	0	0	20	5	11	23
1	1980-09-11	190	160	167	107	91	7913.24	97	2	28	23888.7	2259	3001.07	61.0947	1980-08-14	4912.17	9	3	0	0	0	0	35	50	12	23
1	1980-09-16	170	140	167	107	91	7913.24	97	3	33	23888.7	2260	3001.07	61.0947	1980-08-14	4912.17	9	3	0	0	0	0	35	50	12	23
1	1980-08-14	220	190	168	71	57	3307.07	0	1	0	9987.26	2261	0	0	1980-08-14	3307.07	0	0	0	0	0	0	0	0	0	23
1	1980-08-18	220	190	168	82	59	4012.94	4	2	4	12117.5	2262	705.862	21.344	1980-08-14	3307.07	4	0	0	0	0	0	0	0	4	23
1	1980-08-21	220	190	168	85	72	4975.35	10	2	7	15022.1	2263	1668.27	50.4456	1980-08-14	3307.07	10	0	0	0	0	0	0	0	10	23
1	1980-08-26	200	150	168	87	74	5232.1	10	2	12	15797	2264	1925.02	58.2092	1980-08-14	3307.07	10	0	0	0	0	0	0	0	10	23
1	1980-08-29	220	160	168	87	75	5297.29	12	2	15	15993.7	2265	1990.22	60.1807	1980-08-14	3307.07	10	0	0	0	0	0	1	1	10	23
1	1980-09-02	200	160	168	87	75	5297.29	12	2	19	15993.7	2266	1990.22	60.1807	1980-08-14	3307.07	10	0	0	0	0	0	1	1	10	23
1	1980-09-05	200	170	168	87	75	5297.29	22	2	22	15993.7	2267	1990.22	60.1807	1980-08-14	3307.07	12	0	0	0	0	0	10	0	12	23
1	1980-09-08	220	170	168	87	75	5297.29	25	2	25	15993.7	2268	1990.22	60.1807	1980-08-14	3307.07	12	0	0	0	0	0	10	3	12	23
1	1980-09-11	190	160	168	87	75	5297.29	56	2	28	15993.7	2269	1990.22	60.1807	1980-08-14	3307.07	12	0	0	0	0	0	20	24	12	23
1	1980-09-16	170	140	168	87	75	5297.29	56	3	33	15993.7	2270	1990.22	60.1807	1980-08-14	3307.07	12	0	0	0	0	0	20	24	12	23
1	1980-08-14	220	190	169	83	67	4541.58	0	1	0	13713	2271	0	0	1980-08-14	4541.58	0	0	0	0	0	0	0	0	0	23
1	1980-08-18	220	190	169	104	85	7210.21	1	2	4	21766.9	2272	2668.63	58.76	1980-08-14	4541.58	1	0	0	0	0	0	0	0	1	23
1	1980-08-21	220	190	169	106	88	7596.74	1	2	7	22933.5	2273	3055.17	67.2711	1980-08-14	4541.58	1	0	0	0	0	0	0	0	1	23
1	1980-08-26	200	150	169	113	93	8565.61	2	2	12	25857.5	2274	4024.04	88.6044	1980-08-14	4541.58	2	0	0	0	0	0	0	0	2	23
1	1980-08-29	220	160	169	113	93	8565.61	2	2	15	25857.5	2275	4024.04	88.6044	1980-08-14	4541.58	2	0	0	0	0	0	0	0	2	23
1	1980-09-02	200	160	169	114	93	8648.98	3	2	19	26109.1	2276	4107.4	90.44	1980-08-14	4541.58	3	0	0	0	0	0	0	0	3	23
1	1980-09-05	200	170	169	115	93	8732.74	4	2	22	26361.9	2277	4191.17	92.2844	1980-08-14	4541.58	3	0	0	0	0	0	0	1	3	23
1	1980-09-08	220	170	169	115	94	8816.91	5	2	25	26616	2278	4275.34	94.1378	1980-08-14	4541.58	3	0	0	0	0	0	1	1	3	23
1	1980-09-11	190	160	169	115	95	8901.49	15	2	28	26871.2	2279	4359.91	96	1980-08-14	4541.58	3	0	0	10	0	0	1	1	13	23
1	1980-09-16	170	140	169	115	95	8901.49	15	3	33	26871.2	2280	4359.91	96	1980-08-14	4541.58	3	0	0	10	0	0	1	1	13	23
1	1980-08-14	220	190	170	90	79	5764.98	2	1	0	17405.2	2281	0	0	1980-08-14	5764.98	2	0	0	0	0	0	0	0	2	23
1	1980-08-18	220	190	170	106	85	7363.61	5	2	4	22229.9	2282	1598.63	27.7301	1980-08-14	5764.98	5	0	0	0	0	0	0	0	5	23
1	1980-08-21	220	190	170	106	86	7440.92	15	2	7	22463.2	2283	1675.94	29.0711	1980-08-14	5764.98	15	0	0	0	0	0	0	0	15	23
1	1980-08-26	200	150	170	106	89	7675.26	15	2	12	23170.4	2284	1910.29	33.1361	1980-08-14	5764.98	15	0	0	0	0	0	0	0	15	23
1	1980-08-29	220	160	170	106	90	7754.19	15	2	15	23408.6	2285	1989.21	34.5051	1980-08-14	5764.98	15	0	0	0	0	0	0	0	15	23
1	1980-09-02	200	160	170	106	90	7754.19	15	2	19	23408.6	2286	1989.21	34.5051	1980-08-14	5764.98	15	0	0	0	0	0	0	0	15	23
1	1980-09-05	200	170	170	106	90	7754.19	16	2	22	23408.6	2287	1989.21	34.5051	1980-08-14	5764.98	15	0	0	0	0	0	0	1	15	23
1	1980-09-08	220	170	170	106	90	7754.19	35	2	25	23408.6	2288	1989.21	34.5051	1980-08-14	5764.98	15	0	0	0	0	0	10	10	15	23
1	1980-09-11	190	160	170	106	90	7754.19	55	2	28	23408.6	2289	1989.21	34.5051	1980-08-14	5764.98	20	0	0	0	0	0	20	15	20	23
1	1980-09-16	170	140	170	106	90	7754.19	95	2	33	23408.6	2290	1989.21	34.5051	1980-08-14	5764.98	20	0	0	0	0	0	0	75	20	23
1	1980-09-19	180	150	170	106	90	7754.19	95	2	36	23408.6	2291	1989.21	34.5051	1980-08-14	5764.98	20	0	0	0	0	0	0	75	20	23
1	1980-09-22	210	150	170	106	90	7754.19	95	2	39	23408.6	2292	1989.21	34.5051	1980-08-14	5764.98	20	0	0	0	0	0	0	75	20	23
1	1980-09-25	200	160	170	106	90	7754.19	95	3	42	23408.6	2293	1989.21	34.5051	1980-08-14	5764.98	20	0	0	0	0	0	0	75	20	23
1	1980-08-18	220	190	171	75	60	3678.68	1	1	0	11108.8	2294	0	0	1980-08-18	3678.68	1	0	0	0	0	0	0	0	1	23
1	1980-08-21	220	190	171	83	69	4663.49	2	2	3	14080.9	2295	984.815	26.7709	1980-08-18	3678.68	2	0	0	0	0	0	0	0	2	23
1	1980-08-26	200	150	171	85	71	4912.17	3	2	8	14831.4	2296	1233.49	33.5309	1980-08-18	3678.68	3	0	0	0	0	0	0	0	3	23
1	1980-08-29	220	160	171	89	73	5297.29	5	2	11	15993.7	2297	1618.62	44	1980-08-18	3678.68	5	0	0	0	0	0	0	0	5	23
1	1980-09-02	200	160	171	89	73	5297.29	5	2	15	15993.7	2298	1618.62	44	1980-08-18	3678.68	5	0	0	0	0	0	0	0	5	24
1	1980-09-05	200	170	171	90	75	5495.31	10	2	18	16591.3	2299	1816.63	49.3827	1980-08-18	3678.68	10	0	0	0	0	0	0	0	10	24
1	1980-09-08	220	170	171	90	75	5495.31	10	2	21	16591.3	2300	1816.63	49.3827	1980-08-18	3678.68	10	0	0	0	0	0	0	0	10	24
1	1980-09-11	190	160	171	90	75	5495.31	10	2	24	16591.3	2301	1816.63	49.3827	1980-08-18	3678.68	10	0	0	0	0	0	0	0	10	24
1	1980-09-16	170	140	171	90	75	5495.31	30	2	29	16591.3	2302	1816.63	49.3827	1980-08-18	3678.68	10	0	0	0	0	0	10	10	10	24
1	1980-09-19	180	150	171	90	75	5495.31	77	2	32	16591.3	2303	1816.63	49.3827	1980-08-18	3678.68	12	0	0	0	0	0	15	50	12	24
1	1980-09-22	210	150	171	90	76	5562.12	100	2	35	16793	2304	1883.44	51.1989	1980-08-18	3678.68	12	0	0	0	0	0	7	81	12	24
1	1980-09-25	200	160	171	90	76	5562.12	100	2	38	16793	2305	1883.44	51.1989	1980-08-18	3678.68	12	0	0	0	0	0	2	86	12	24
1	1980-09-29	200	150	171	90	76	5562.12	100	2	42	16793	2306	1883.44	51.1989	1980-08-18	3678.68	12	0	0	0	0	0	0	88	12	24
1	1980-10-02	180	140	171	90	76	5562.12	100	3	45	16793	2307	1883.44	51.1989	1980-08-18	3678.68	12	0	0	0	0	0	0	88	12	24
1	1980-08-18	220	190	172	81	70	4602.33	0	1	0	13896.3	2308	0	0	1980-08-18	4602.33	0	0	0	0	0	0	0	0	0	24
1	1980-08-21	220	190	172	92	81	6041.1	1	2	3	18238.6	2309	1438.77	31.2618	1980-08-18	4602.33	1	0	0	0	0	0	0	0	1	24
1	1980-08-26	200	150	172	95	84	6467.41	1	2	8	19525.1	2310	1865.07	40.5245	1980-08-18	4602.33	1	0	0	0	0	0	0	0	1	24
1	1980-08-29	220	160	172	95	85	6539.87	1	2	11	19743.8	2311	1937.54	42.099	1980-08-18	4602.33	1	0	0	0	0	0	0	0	1	24
1	1980-09-02	200	160	172	97	86	6759.68	1	2	15	20407.2	2312	2157.35	46.8751	1980-08-18	4602.33	1	0	0	0	0	0	0	0	1	24
1	1980-09-05	200	170	172	97	87	6833.76	2	2	18	20630.8	2313	2231.43	48.4847	1980-08-18	4602.33	2	0	0	0	0	0	0	0	2	24
1	1980-09-08	220	170	172	98	87	6908.24	3	2	21	20855.6	2314	2305.91	50.1031	1980-08-18	4602.33	3	0	0	0	0	0	0	0	3	24
1	1980-09-11	190	160	172	98	87	6908.24	4	2	24	20855.6	2315	2305.91	50.1031	1980-08-18	4602.33	4	0	0	0	0	0	0	0	4	24
1	1980-09-16	170	140	172	99	87	6983.13	11	2	29	21081.6	2316	2380.79	51.7302	1980-08-18	4602.33	5	0	0	0	0	0	5	1	5	24
1	1980-09-19	180	150	172	100	89	7210.21	15	2	32	21766.9	2317	2607.87	56.6642	1980-08-18	4602.33	7	0	0	0	0	0	3	5	7	24
1	1980-09-22	210	150	172	100	89	7210.21	31	2	35	21766.9	2318	2607.87	56.6642	1980-08-18	4602.33	11	0	0	0	0	0	15	5	11	24
1	1980-09-25	200	160	172	100	89	7210.21	46	2	38	21766.9	2319	2607.87	56.6642	1980-08-18	4602.33	11	0	0	0	0	0	10	25	11	24
1	1980-09-29	200	150	172	100	89	7210.21	80	2	42	21766.9	2320	2607.87	56.6642	1980-08-18	4602.33	15	0	0	0	0	0	15	50	15	24
1	1980-10-02	180	140	172	100	89	7210.21	80	3	45	21766.9	2321	2607.87	56.6642	1980-08-18	4602.33	15	0	0	0	0	0	15	50	15	24
1	1980-08-18	220	190	173	63	57	2906.61	1	1	0	8778.65	2322	0	0	1980-08-18	2906.61	1	0	0	0	0	0	0	0	1	24
1	1980-08-21	220	190	173	70	63	3570.49	3	2	3	10782.2	2323	663.877	22.8403	1980-08-18	2906.61	3	0	0	0	0	0	0	0	3	24
1	1980-08-26	200	150	173	72	65	3788.48	12	2	8	11440.1	2324	881.873	30.3403	1980-08-18	2906.61	12	0	0	0	0	0	0	0	12	24
1	1980-08-29	220	160	173	74	65	3899.9	12	2	11	11776.4	2325	993.293	34.1736	1980-08-18	2906.61	12	0	0	0	0	0	0	0	12	24
1	1980-09-02	200	160	173	74	65	3899.9	20	2	15	11776.4	2326	993.293	34.1736	1980-08-18	2906.61	20	0	0	0	0	0	0	0	20	24
1	1980-09-05	200	170	173	74	65	3899.9	25	2	18	11776.4	2327	993.293	34.1736	1980-08-18	2906.61	25	0	0	0	0	0	0	0	25	24
1	1980-09-08	220	170	173	74	65	3899.9	28	2	21	11776.4	2328	993.293	34.1736	1980-08-18	2906.61	25	0	0	0	0	0	3	0	25	24
1	1980-09-11	190	160	173	74	66	3956.22	28	2	24	11946.4	2329	1049.61	36.1111	1980-08-18	2906.61	25	0	0	0	0	0	3	0	25	24
1	1980-09-16	170	140	173	74	66	3956.22	29	2	29	11946.4	2330	1049.61	36.1111	1980-08-18	2906.61	25	0	0	0	0	0	2	2	25	24
1	1980-09-19	180	150	173	74	66	3956.22	33	2	32	11946.4	2331	1049.61	36.1111	1980-08-18	2906.61	25	0	0	0	0	0	5	3	25	24
1	1980-09-22	210	150	173	74	66	3956.22	90	2	35	11946.4	2332	1049.61	36.1111	1980-08-18	2906.61	45	0	0	0	0	0	20	25	45	24
1	1980-09-25	200	160	173	74	66	3956.22	90	3	38	11946.4	2333	1049.61	36.1111	1980-08-18	2906.61	45	0	0	0	0	0	20	25	45	24
1	1980-08-18	220	190	174	74	64	3843.99	0	1	0	11607.7	2334	0	0	1980-08-18	3843.99	0	0	0	0	0	0	0	0	0	24
1	1980-08-21	220	190	174	100	67	5629.33	1	2	3	16995.8	2335	1785.34	46.4451	1980-08-18	3843.99	1	0	0	0	0	0	0	0	1	24
1	1980-08-26	200	150	174	100	87	7058.42	1	3	8	21308.8	2336	3214.43	83.6221	1980-08-18	3843.99	1	0	0	0	0	0	0	0	1	24
1	1980-08-18	220	190	175	78	67	4243.85	1	1	0	12814.4	2337	0	0	1980-08-18	4243.85	1	0	0	0	0	0	0	0	1	24
1	1980-08-21	220	190	175	81	70	4602.33	1	2	3	13896.3	2338	358.482	8.44709	1980-08-18	4243.85	1	0	0	0	0	0	0	0	1	24
1	1980-08-26	200	150	175	83	71	4787.02	2	2	8	14453.7	2339	543.172	12.799	1980-08-18	4243.85	2	0	0	0	0	0	0	0	2	24
1	1980-08-29	220	160	175	83	76	5102.91	6	2	11	15407.1	2340	859.064	20.2426	1980-08-18	4243.85	2	0	4	0	0	0	0	0	6	24
1	1980-09-02	200	160	175	83	76	5102.91	62	2	15	15407.1	2341	859.064	20.2426	1980-08-18	4243.85	2	0	4	55	1	0	0	0	61	24
1	1980-09-05	200	170	175	83	76	5102.91	62	2	18	15407.1	2342	859.064	20.2426	1980-08-18	4243.85	2	0	4	55	1	0	0	0	61	24
1	1980-09-08	220	170	175	83	76	5102.91	62	2	21	15407.1	2343	859.064	20.2426	1980-08-18	4243.85	2	0	4	55	1	0	0	0	61	24
1	1980-09-11	190	160	175	83	76	5102.91	62	3	24	15407.1	2344	859.064	20.2426	1980-08-18	4243.85	2	0	4	55	1	0	0	0	61	24
1	1980-08-18	220	190	176	77	68	4243.85	0	1	0	12814.4	2345	0	0	1980-08-18	4243.85	0	0	0	0	0	0	0	0	0	24
1	1980-08-21	220	190	176	94	84	6395.35	1	2	3	19307.7	2346	2151.5	50.6968	1980-08-18	4243.85	1	0	0	0	0	0	0	0	1	24
1	1980-08-26	200	150	176	94	84	6395.35	1	3	8	19307.7	2347	2151.5	50.6968	1980-08-18	4243.85	1	0	0	0	0	0	0	0	1	24
1	1980-08-18	220	190	177	75	61	3733.38	0	1	0	11273.8	2348	0	0	1980-08-18	3733.38	0	0	0	0	0	0	0	0	0	24
1	1980-08-21	220	190	177	87	72	5102.91	1	2	3	15407.1	2349	1369.54	36.6836	1980-08-18	3733.38	1	0	0	0	0	0	0	0	1	24
1	1980-08-26	200	150	177	93	75	5696.95	4	2	8	17199.9	2350	1963.58	52.5952	1980-08-18	3733.38	4	0	0	0	0	0	0	0	4	24
1	1980-08-29	220	160	177	94	77	5902.23	4	2	11	17819.4	2351	2168.85	58.0936	1980-08-18	3733.38	4	0	0	0	0	0	0	0	4	24
1	1980-09-02	200	160	177	94	77	5902.23	8	2	15	17819.4	2352	2168.85	58.0936	1980-08-18	3733.38	8	0	0	0	0	0	0	0	8	24
1	1980-09-05	200	170	177	97	80	6323.69	8	2	18	19091.4	2353	2590.31	69.3826	1980-08-18	3733.38	8	0	0	0	0	0	0	0	8	24
1	1980-09-08	220	170	177	97	80	6323.69	9	2	21	19091.4	2354	2590.31	69.3826	1980-08-18	3733.38	8	0	0	0	0	0	1	0	8	24
1	1980-09-11	190	160	177	97	80	6323.69	13	2	24	19091.4	2355	2590.31	69.3826	1980-08-18	3733.38	8	0	0	0	0	0	4	1	8	24
1	1980-09-16	170	140	177	98	82	6539.87	23	2	29	19743.8	2356	2806.49	75.173	1980-08-18	3733.38	15	0	0	0	0	0	5	3	15	24
1	1980-09-19	180	150	177	98	82	6539.87	24	2	32	19743.8	2357	2806.49	75.173	1980-08-18	3733.38	15	0	0	0	0	0	4	5	15	24
1	1980-09-22	210	150	177	98	82	6539.87	31	2	35	19743.8	2358	2806.49	75.173	1980-08-18	3733.38	15	0	0	0	0	0	10	6	15	24
1	1980-09-25	200	160	177	98	82	6539.87	100	2	38	19743.8	2359	2806.49	75.173	1980-08-18	3733.38	15	0	0	0	0	0	0	85	15	25
1	1980-09-29	200	150	177	98	82	6539.87	100	3	42	19743.8	2360	2806.49	75.173	1980-08-18	3733.38	15	0	0	0	0	0	0	85	15	25
1	1980-08-18	220	190	178	83	57	3956.22	0	1	0	11946.4	2361	0	0	1980-08-18	3956.22	0	0	0	0	0	0	0	0	0	25
1	1980-08-21	220	190	178	97	82	6467.41	1	2	3	19525.1	2362	2511.19	63.4745	1980-08-18	3956.22	0	0	1	0	0	0	0	0	1	25
1	1980-08-26	200	150	178	101	86	7058.42	1	2	8	21308.8	2363	3102.2	78.4133	1980-08-18	3956.22	0	0	1	0	0	0	0	0	1	25
1	1980-08-29	220	160	178	102	87	7210.21	1	2	11	21766.9	2364	3253.99	82.25	1980-08-18	3956.22	0	0	1	0	0	0	0	0	1	25
1	1980-09-02	200	160	178	104	88	7440.92	3	2	15	22463.2	2365	3484.7	88.0816	1980-08-18	3956.22	2	0	1	0	0	0	0	0	3	25
1	1980-09-05	200	170	178	104	89	7518.63	3	2	18	22697.7	2366	3562.41	90.0459	1980-08-18	3956.22	2	0	1	0	0	0	0	0	3	25
1	1980-09-08	220	170	178	104	89	7518.63	4	2	21	22697.7	2367	3562.41	90.0459	1980-08-18	3956.22	3	0	1	0	0	0	0	0	4	25
1	1980-09-11	190	160	178	104	89	7518.63	5	2	24	22697.7	2368	3562.41	90.0459	1980-08-18	3956.22	4	0	1	0	0	0	0	0	5	25
1	1980-09-16	170	140	178	104	90	7596.74	11	2	29	22933.5	2369	3640.53	92.0204	1980-08-18	3956.22	9	0	1	0	0	0	1	0	10	25
1	1980-09-19	180	150	178	104	90	7596.74	11	2	32	22933.5	2370	3640.53	92.0204	1980-08-18	3956.22	9	0	1	0	0	0	0	1	10	25
1	1980-09-22	210	150	178	105	90	7675.26	19	2	35	23170.4	2371	3719.05	94.0051	1980-08-18	3956.22	11	0	1	0	0	0	4	3	12	25
1	1980-09-25	200	160	178	105	90	7675.26	26	2	38	23170.4	2372	3719.05	94.0051	1980-08-18	3956.22	11	0	1	0	0	0	4	10	12	25
1	1980-09-29	200	150	178	105	90	7675.26	67	2	42	23170.4	2373	3719.05	94.0051	1980-08-18	3956.22	11	0	1	0	0	0	30	25	12	25
1	1980-10-02	180	140	178	105	90	7675.26	92	2	45	23170.4	2374	3719.05	94.0051	1980-08-18	3956.22	16	0	1	0	0	2	10	63	17	25
1	1980-10-06	160	120	178	105	90	7675.26	92	2	49	23170.4	2375	3719.05	94.0051	1980-08-18	3956.22	16	0	1	0	0	2	0	73	17	25
1	1980-10-09	140	70	178	105	90	7675.26	92	3	52	23170.4	2376	3719.05	94.0051	1980-08-18	3956.22	16	0	1	0	0	2	0	73	17	25
1	1980-08-18	220	190	179	123	96	9680.82	0	1	0	29223.2	2377	0	0	1980-08-18	9680.82	0	0	0	0	0	0	0	0	0	25
1	1980-08-21	220	190	179	135	106	11723.5	2	2	3	35388.1	2378	2042.7	21.1005	1980-08-18	9680.82	2	0	0	0	0	0	0	0	2	25
1	1980-08-26	200	150	179	140	110	12615.5	3	2	8	38080	2379	2934.67	30.3142	1980-08-18	9680.82	3	0	0	0	0	0	0	0	3	25
1	1980-08-29	220	160	179	142	110	12818.1	3	2	11	38691.7	2380	3137.32	32.4076	1980-08-18	9680.82	3	0	0	0	0	0	0	0	3	25
1	1980-09-02	200	160	179	143	110	12920.1	3	2	15	38999.3	2381	3239.25	33.4605	1980-08-18	9680.82	3	0	0	0	0	0	0	0	3	25
1	1980-09-05	200	170	179	143	110	12920.1	6	2	18	38999.3	2382	3239.25	33.4605	1980-08-18	9680.82	5	0	0	0	0	0	0	1	5	25
1	1980-09-08	220	170	179	144	112	13228.3	8	2	21	39929.5	2383	3547.48	36.6444	1980-08-18	9680.82	7	0	0	0	0	0	0	1	7	25
1	1980-09-11	190	160	179	144	113	13331.8	8	2	24	40242	2384	3651.02	37.714	1980-08-18	9680.82	7	0	0	0	0	0	0	1	7	25
1	1980-09-16	170	140	179	147	113	13644.9	9	2	29	41186.8	2385	3964.09	40.9479	1980-08-18	9680.82	7	0	0	0	0	0	1	1	7	25
1	1980-09-19	180	150	179	147	113	13644.9	14	2	32	41186.8	2386	3964.09	40.9479	1980-08-18	9680.82	8	0	0	0	0	0	5	1	8	25
1	1980-09-22	210	150	179	147	113	13644.9	23	2	35	41186.8	2387	3964.09	40.9479	1980-08-18	9680.82	8	0	0	0	0	0	10	5	8	25
1	1980-09-25	200	160	179	147	113	13644.9	31	2	38	41186.8	2388	3964.09	40.9479	1980-08-18	9680.82	8	0	0	0	0	0	3	20	8	25
1	1980-09-29	200	150	179	147	113	13644.9	31	2	42	41186.8	2389	3964.09	40.9479	1980-08-18	9680.82	8	0	0	0	0	0	3	20	8	25
1	1980-10-02	180	140	179	147	113	13644.9	41	2	45	41186.8	2390	3964.09	40.9479	1980-08-18	9680.82	17	0	0	0	0	1	3	20	17	25
1	1980-10-06	160	120	179	147	113	13644.9	41	2	49	41186.8	2391	3964.09	40.9479	1980-08-18	9680.82	17	0	0	0	0	1	3	20	17	25
1	1980-10-09	140	70	179	147	113	13644.9	46	2	52	41186.8	2392	3964.09	40.9479	1980-08-18	9680.82	20	0	0	0	0	1	0	25	20	25
1	1980-10-13	130	80	179	147	113	13644.9	66	2	56	41186.8	2393	3964.09	40.9479	1980-08-18	9680.82	40	0	0	0	0	1	0	25	40	25
1	1980-10-16	140	80	179	147	113	13644.9	66	2	59	41186.8	2394	3964.09	40.9479	1980-08-18	9680.82	40	0	0	0	0	1	10	15	40	25
1	1980-10-20	110	80	179	147	113	13644.9	66	3	63	41186.8	2395	3964.09	40.9479	1980-08-18	9680.82	40	0	0	0	0	1	10	15	40	25
1	1980-08-18	220	190	180	75	51	3204.54	0	1	0	9677.79	2396	0	0	1980-08-18	3204.54	0	0	0	0	0	0	0	0	0	25
1	1980-08-21	220	190	180	77	65	4070.06	1	2	3	12289.9	2397	865.523	27.0093	1980-08-18	3204.54	1	0	0	0	0	0	0	0	1	25
1	1980-08-26	200	150	180	79	67	4302.59	2	2	8	12991.7	2398	1098.05	34.2656	1980-08-18	3204.54	2	0	0	0	0	0	0	0	2	25
1	1980-08-29	220	160	180	79	67	4302.59	5	2	11	12991.7	2399	1098.05	34.2656	1980-08-18	3204.54	3	0	0	0	0	0	1	1	3	25
1	1980-09-02	200	160	180	79	67	4302.59	9	2	15	12991.7	2400	1098.05	34.2656	1980-08-18	3204.54	3	0	0	0	0	0	5	1	3	25
1	1980-09-05	200	170	180	80	67	4361.73	17	2	18	13170.2	2401	1157.19	36.1111	1980-08-18	3204.54	4	0	0	0	0	0	8	5	4	25
1	1980-09-08	220	170	180	80	68	4421.27	25	2	21	13349.9	2402	1216.74	37.9693	1980-08-18	3204.54	4	0	8	0	0	0	5	8	12	25
1	1980-09-11	190	160	180	80	68	4421.27	26	2	24	13349.9	2403	1216.74	37.9693	1980-08-18	3204.54	4	0	8	0	0	0	6	8	12	25
1	1980-09-16	170	140	180	80	68	4421.27	87	2	29	13349.9	2404	1216.74	37.9693	1980-08-18	3204.54	4	0	8	0	0	0	40	35	12	25
1	1980-09-19	180	150	180	80	68	4421.27	87	3	32	13349.9	2405	1216.74	37.9693	1980-08-18	3204.54	4	0	8	0	0	0	40	35	12	25
1	1980-08-18	220	190	181	84	74	5038.93	1	1	0	15214	2406	0	0	1980-08-18	5038.93	1	0	0	0	0	0	0	0	1	25
1	1980-08-21	220	190	181	92	81	6041.1	2	2	3	18238.6	2407	1002.17	19.8886	1980-08-18	5038.93	2	0	0	0	0	0	0	0	2	25
1	1980-08-26	200	150	181	96	83	6467.41	2	2	8	19525.1	2408	1428.48	28.3488	1980-08-18	5038.93	2	0	0	0	0	0	0	0	2	25
1	1980-08-29	220	160	181	97	84	6612.74	2	2	11	19963.7	2409	1573.81	31.233	1980-08-18	5038.93	2	0	0	0	0	0	0	0	2	25
1	1980-09-02	200	160	181	99	86	6908.24	4	2	15	20855.6	2410	1869.31	37.0974	1980-08-18	5038.93	2	0	0	0	0	0	0	2	2	25
1	1980-09-05	200	170	181	99	86	6908.24	6	2	18	20855.6	2411	1869.31	37.0974	1980-08-18	5038.93	5	0	0	0	0	0	1	0	5	25
1	1980-09-08	220	170	181	99	86	6908.24	11	2	21	20855.6	2412	1869.31	37.0974	1980-08-18	5038.93	5	0	0	0	0	0	1	5	5	25
1	1980-09-11	190	160	181	99	86	6908.24	11	2	24	20855.6	2413	1869.31	37.0974	1980-08-18	5038.93	5	0	0	0	0	0	1	5	5	25
1	1980-09-16	170	140	181	101	86	7058.42	13	2	29	21308.8	2414	2019.49	40.0777	1980-08-18	5038.93	6	0	0	0	0	0	1	6	6	25
1	1980-09-19	180	150	181	102	86	7134.11	19	2	32	21537.2	2415	2095.18	41.5799	1980-08-18	5038.93	10	0	0	0	0	0	5	4	10	25
1	1980-09-22	210	150	181	102	86	7134.11	27	2	35	21537.2	2416	2095.18	41.5799	1980-08-18	5038.93	15	0	0	0	0	0	4	8	15	25
1	1980-09-25	200	160	181	102	86	7134.11	41	2	38	21537.2	2417	2095.18	41.5799	1980-08-18	5038.93	15	0	0	0	0	0	10	16	15	25
1	1980-09-29	200	150	181	102	86	7134.11	98	2	42	21537.2	2418	2095.18	41.5799	1980-08-18	5038.93	15	0	0	0	0	0	25	58	15	25
1	1980-10-02	180	140	181	102	86	7134.11	98	3	45	21537.2	2419	2095.18	41.5799	1980-08-18	5038.93	15	0	0	0	0	0	25	58	15	25
1	1980-08-18	220	190	182	95	80	6181.59	1	1	0	18662.5	2420	0	0	1980-08-18	6181.59	1	0	0	0	0	0	0	0	1	26
1	1980-08-21	220	190	182	101	85	6983.13	1	2	3	21081.6	2421	801.538	12.9665	1980-08-18	6181.59	1	0	0	0	0	0	0	0	1	26
1	1980-08-26	200	150	182	105	89	7596.74	2	2	8	22933.5	2422	1415.15	22.8931	1980-08-18	6181.59	2	0	0	0	0	0	0	0	2	26
1	1980-08-29	220	160	182	106	89	7675.26	2	2	11	23170.4	2423	1493.67	24.1633	1980-08-18	6181.59	2	0	0	0	0	0	0	0	2	26
1	1980-09-02	200	160	182	108	91	7993.37	2	2	15	24130.5	2424	1811.79	29.3094	1980-08-18	6181.59	2	0	0	0	0	0	0	0	2	26
1	1980-09-05	200	170	182	108	91	7993.37	5	2	18	24130.5	2425	1811.79	29.3094	1980-08-18	6181.59	2	0	2	0	0	0	1	0	4	26
1	1980-09-08	220	170	182	110	92	8236.2	8	2	21	24863.4	2426	2054.61	33.2376	1980-08-18	6181.59	2	0	3	0	0	0	1	2	5	26
1	1980-09-11	190	160	182	110	92	8236.2	8	2	24	24863.4	2427	2054.61	33.2376	1980-08-18	6181.59	2	0	3	0	0	0	1	2	5	26
1	1980-09-16	170	140	182	111	93	8400.1	10	2	29	25358	2428	2218.51	35.889	1980-08-18	6181.59	2	0	3	0	0	0	0	5	5	26
1	1980-09-19	180	150	182	111	93	8400.1	21	2	32	25358	2429	2218.51	35.889	1980-08-18	6181.59	2	0	3	0	0	0	10	6	5	26
1	1980-09-22	210	150	182	111	93	8400.1	32	2	35	25358	2430	2218.51	35.889	1980-08-18	6181.59	2	0	3	0	0	0	20	7	5	26
1	1980-09-25	200	160	182	111	93	8400.1	70	2	38	25358	2431	2218.51	35.889	1980-08-18	6181.59	2	0	3	0	0	0	55	10	5	26
1	1980-09-29	200	150	182	111	93	8400.1	70	3	42	25358	2432	2218.51	35.889	1980-08-18	6181.59	2	0	3	0	0	0	55	10	5	26
1	1980-08-18	220	190	183	69	69	3843.99	0	1	0	11607.7	2433	0	0	1980-08-18	3843.99	0	0	0	0	0	0	0	0	0	26
1	1980-08-21	220	190	183	107	84	7363.61	1	2	3	22229.9	2434	3519.62	91.5616	1980-08-18	3843.99	1	0	0	0	0	0	0	0	1	26
1	1980-08-26	200	150	183	113	90	8317.95	1	2	8	25110.1	2435	4473.96	116.388	1980-08-18	3843.99	1	0	0	0	0	0	0	0	1	26
1	1980-08-29	220	160	183	117	93	8901.49	1	2	11	26871.2	2436	5057.5	131.569	1980-08-18	3843.99	1	0	0	0	0	0	0	0	1	26
1	1980-09-02	200	160	183	118	95	9157.63	3	2	15	27644.2	2437	5313.64	138.233	1980-08-18	3843.99	3	0	0	0	0	0	0	0	3	26
1	1980-09-05	200	170	183	120	96	9417.41	3	2	18	28428.3	2438	5573.42	144.991	1980-08-18	3843.99	3	0	0	0	0	0	0	0	3	26
1	1980-09-08	220	170	183	120	97	9504.81	3	2	21	28692	2439	5660.82	147.264	1980-08-18	3843.99	3	0	0	0	0	0	0	0	3	26
1	1980-09-11	190	160	183	122	98	9769.43	3	2	24	29490.7	2440	5925.44	154.148	1980-08-18	3843.99	3	0	0	0	0	0	0	0	3	26
1	1980-09-16	170	140	183	122	98	9769.43	3	3	29	29490.7	2441	5925.44	154.148	1980-08-18	3843.99	3	0	0	0	0	0	0	0	3	26
1	1980-08-21	220	190	184	91	76	5629.33	2	1	0	16995.8	2442	0	0	1980-08-21	5629.33	2	0	0	0	0	0	0	0	2	26
1	1980-08-26	200	150	184	99	83	6686.01	7	2	5	20184.9	2443	1056.67	18.7708	1980-08-21	5629.33	7	0	0	0	0	0	0	0	7	26
1	1980-08-29	220	160	184	99	84	6759.68	12	2	8	20407.2	2444	1130.35	20.0796	1980-08-21	5629.33	12	0	0	0	0	0	0	0	12	26
1	1980-09-02	200	160	184	99	86	6908.24	20	2	12	20855.6	2445	1278.91	22.7186	1980-08-21	5629.33	20	0	0	0	0	0	0	0	20	26
1	1980-09-05	200	170	184	99	86	6908.24	22	2	15	20855.6	2446	1278.91	22.7186	1980-08-21	5629.33	22	0	0	0	0	0	0	0	22	26
1	1980-09-08	220	170	184	100	87	7058.42	25	2	18	21308.8	2447	1429.08	25.3864	1980-08-21	5629.33	25	0	0	0	0	0	0	0	25	26
1	1980-09-11	190	160	184	100	88	7134.11	29	2	21	21537.2	2448	1504.78	26.731	1980-08-21	5629.33	28	0	0	0	0	0	1	0	28	26
1	1980-09-16	170	140	184	100	88	7134.11	35	2	26	21537.2	2449	1504.78	26.731	1980-08-21	5629.33	28	0	0	0	0	0	1	6	28	26
1	1980-09-19	180	150	184	100	88	7134.11	42	2	29	21537.2	2450	1504.78	26.731	1980-08-21	5629.33	30	0	0	0	0	0	6	6	30	26
1	1980-09-22	210	150	184	100	88	7134.11	55	2	32	21537.2	2451	1504.78	26.731	1980-08-21	5629.33	30	0	0	0	0	0	10	15	30	26
1	1980-09-25	200	160	184	100	88	7134.11	67	2	35	21537.2	2452	1504.78	26.731	1980-08-21	5629.33	35	0	0	0	0	0	2	30	35	26
1	1980-09-29	200	150	184	100	88	7134.11	100	2	39	21537.2	2453	1504.78	26.731	1980-08-21	5629.33	35	0	0	0	0	0	5	60	35	26
1	1980-10-02	180	140	184	100	88	7134.11	86	2	42	21537.2	2454	1504.78	26.731	1980-08-21	5629.33	35	0	0	0	0	0	1	50	35	26
1	1980-10-06	160	120	184	100	88	7134.11	86	3	46	21537.2	2455	1504.78	26.731	1980-08-21	5629.33	35	0	0	0	0	0	1	50	35	26
1	1980-08-21	220	190	185	65	59	3103.61	1	1	0	9373.21	2456	0	0	1980-08-21	3103.61	0	0	1	0	0	0	0	0	1	26
1	1980-08-26	200	150	185	70	63	3570.49	2	2	5	10782.2	2457	466.874	15.0429	1980-08-21	3103.61	1	0	1	0	0	0	0	0	2	26
1	1980-08-29	220	160	185	71	65	3733.38	4	2	8	11273.8	2458	629.765	20.2914	1980-08-21	3103.61	3	0	1	0	0	0	0	0	4	26
1	1980-09-02	200	160	185	72	65	3788.48	10	2	12	11440.1	2459	684.87	22.0669	1980-08-21	3103.61	9	0	1	0	0	0	0	0	10	26
1	1980-09-05	200	170	185	72	66	3843.99	26	2	15	11607.7	2460	740.378	23.8554	1980-08-21	3103.61	25	0	1	0	0	0	0	0	26	26
1	1980-09-08	220	170	185	72	66	3843.99	35	2	18	11607.7	2461	740.378	23.8554	1980-08-21	3103.61	34	0	1	0	0	0	0	0	35	26
1	1980-09-11	190	160	185	72	66	3843.99	55	2	21	11607.7	2462	740.378	23.8554	1980-08-21	3103.61	50	0	1	0	0	0	4	0	51	26
1	1980-09-16	170	140	185	72	66	3843.99	79	2	26	11607.7	2463	740.378	23.8554	1980-08-21	3103.61	50	0	1	0	0	0	25	3	51	26
1	1980-09-19	180	150	185	72	66	3843.99	71	2	29	11607.7	2464	740.378	23.8554	1980-08-21	3103.61	50	0	1	0	0	0	3	17	51	26
1	1980-09-22	210	150	185	72	66	3843.99	71	2	32	11607.7	2465	740.378	23.8554	1980-08-21	3103.61	50	0	1	0	0	0	0	20	51	26
1	1980-09-25	200	160	185	72	66	3843.99	71	3	35	11607.7	2466	740.378	23.8554	1980-08-21	3103.61	50	0	1	0	0	0	0	20	51	26
1	1980-08-21	220	190	186	87	69	4912.17	0	1	0	14831.4	2467	0	0	1980-08-21	4912.17	0	0	0	0	0	0	0	0	0	26
1	1980-08-26	200	150	186	103	84	7058.42	1	2	5	21308.8	2468	2146.25	43.6925	1980-08-21	4912.17	1	0	0	0	0	0	0	0	1	26
1	1980-08-29	220	160	186	107	87	7596.74	1	2	8	22933.5	2469	2684.58	54.6515	1980-08-21	4912.17	1	0	0	0	0	0	0	0	1	26
1	1980-09-02	200	160	186	109	89	7913.24	2	2	12	23888.7	2470	3001.07	61.0947	1980-08-21	4912.17	2	0	0	0	0	0	0	0	2	26
1	1980-09-05	200	170	186	109	90	7993.37	2	2	15	24130.5	2471	3081.21	62.726	1980-08-21	4912.17	2	0	0	0	0	0	0	0	2	26
1	1980-09-08	220	170	186	110	91	8154.85	2	2	18	24617.9	2472	3242.68	66.0133	1980-08-21	4912.17	2	0	0	0	0	0	0	0	2	26
1	1980-09-11	190	160	186	110	91	8154.85	4	2	21	24617.9	2473	3242.68	66.0133	1980-08-21	4912.17	3	0	0	0	0	0	1	0	3	26
1	1980-09-16	170	140	186	112	91	8317.95	6	2	26	25110.1	2474	3405.78	69.3335	1980-08-21	4912.17	3	0	0	0	0	0	1	2	3	26
1	1980-09-19	180	150	186	112	91	8317.95	10	2	29	25110.1	2475	3405.78	69.3335	1980-08-21	4912.17	4	0	0	0	0	0	2	4	4	26
1	1980-09-22	210	150	186	112	91	8317.95	36	2	32	25110.1	2476	3405.78	69.3335	1980-08-21	4912.17	4	0	0	0	0	0	14	18	4	26
1	1980-09-25	200	160	186	112	91	8317.95	64	2	35	25110.1	2477	3405.78	69.3335	1980-08-21	4912.17	4	0	0	0	0	0	15	45	4	26
1	1980-09-29	200	150	186	112	91	8317.95	90	2	39	25110.1	2478	3405.78	69.3335	1980-08-21	4912.17	4	0	0	0	0	0	2	84	4	26
1	1980-10-02	180	140	186	112	91	8317.95	90	3	42	25110.1	2479	3405.78	69.3335	1980-08-21	4912.17	4	0	0	0	0	0	2	84	4	26
1	1980-08-21	220	190	187	78	63	4012.94	0	1	0	12117.5	2480	0	0	1980-08-21	4012.94	0	0	0	0	0	0	0	0	0	26
1	1980-08-26	200	150	187	98	78	6252.44	1	2	5	18876.4	2481	2239.5	55.8071	1980-08-21	4012.94	1	0	0	0	0	0	0	0	1	27
1	1980-08-29	220	160	187	103	83	6983.13	1	2	8	21081.6	2482	2970.19	74.0154	1980-08-21	4012.94	1	0	0	0	0	0	0	0	1	27
1	1980-09-02	200	160	187	106	85	7363.61	4	2	12	22229.9	2483	3350.67	83.4968	1980-08-21	4012.94	4	0	0	0	0	0	0	0	4	27
1	1980-09-05	200	170	187	106	86	7440.92	4	2	15	22463.2	2484	3427.98	85.4233	1980-08-21	4012.94	4	0	0	0	0	0	0	0	4	27
1	1980-09-08	220	170	187	107	86	7518.63	6	2	18	22697.7	2485	3505.69	87.3598	1980-08-21	4012.94	6	0	0	0	0	0	0	0	6	27
1	1980-09-11	190	160	187	108	87	7675.26	6	2	21	23170.4	2486	3662.33	91.263	1980-08-21	4012.94	6	0	0	0	0	0	0	0	6	27
1	1980-09-16	170	140	187	109	87	7754.19	8	2	26	23408.6	2487	3741.25	93.2297	1980-08-21	4012.94	8	0	0	0	0	0	0	0	8	27
1	1980-09-19	180	150	187	109	88	7833.51	17	2	29	23648	2488	3820.58	95.2065	1980-08-21	4012.94	17	0	0	0	0	0	0	0	17	27
1	1980-09-22	210	150	187	109	88	7833.51	20	2	32	23648	2489	3820.58	95.2065	1980-08-21	4012.94	17	0	0	0	0	0	3	0	17	27
1	1980-09-25	200	160	187	109	88	7833.51	26	2	35	23648	2490	3820.58	95.2065	1980-08-21	4012.94	17	0	0	0	0	0	3	6	17	27
1	1980-09-29	200	150	187	109	88	7833.51	55	2	39	23648	2491	3820.58	95.2065	1980-08-21	4012.94	25	0	0	0	0	0	10	20	25	27
1	1980-10-02	180	140	187	109	88	7833.51	55	3	42	23648	2492	3820.58	95.2065	1980-08-21	4012.94	25	0	0	0	0	0	10	20	25	27
1	1980-08-21	220	190	188	96	75	5902.23	0	1	0	17819.4	2493	0	0	1980-08-21	5902.23	0	0	0	0	0	0	0	0	0	27
1	1980-08-26	200	150	188	107	83	7286.71	1	2	5	21997.8	2494	1384.47	23.4568	1980-08-21	5902.23	1	0	0	0	0	0	0	0	1	27
1	1980-08-29	220	160	188	109	85	7596.74	1	2	8	22933.5	2495	1694.51	28.7097	1980-08-21	5902.23	1	0	0	0	0	0	0	0	1	27
1	1980-09-02	200	160	188	113	87	8073.91	2	2	12	24373.6	2496	2171.68	36.7942	1980-08-21	5902.23	2	0	0	0	0	0	0	0	2	27
1	1980-09-05	200	170	188	113	88	8154.85	2	2	15	24617.9	2497	2252.62	38.1656	1980-08-21	5902.23	2	0	0	0	0	0	0	0	2	27
1	1980-09-08	220	170	188	113	88	8154.85	2	2	18	24617.9	2498	2252.62	38.1656	1980-08-21	5902.23	2	0	0	0	0	0	0	0	2	27
1	1980-09-11	190	160	188	113	88	8154.85	3	2	21	24617.9	2499	2252.62	38.1656	1980-08-21	5902.23	3	0	0	0	0	0	0	0	3	27
1	1980-09-16	170	140	188	115	89	8400.1	3	2	26	25358	2500	2497.87	42.3207	1980-08-21	5902.23	3	0	0	0	0	0	0	0	3	27
1	1980-09-19	180	150	188	115	90	8482.65	3	2	29	25607.2	2501	2580.42	43.7194	1980-08-21	5902.23	3	0	0	0	0	0	0	0	3	27
1	1980-09-22	210	150	188	115	90	8482.65	5	2	32	25607.2	2502	2580.42	43.7194	1980-08-21	5902.23	4	0	0	0	0	0	1	0	4	27
1	1980-09-25	200	160	188	116	90	8565.61	5	2	35	25857.5	2503	2663.38	45.125	1980-08-21	5902.23	4	0	0	0	0	0	0	1	4	27
1	1980-09-29	200	150	188	116	90	8565.61	7	2	39	25857.5	2504	2663.38	45.125	1980-08-21	5902.23	4	0	0	0	0	1	1	1	4	27
1	1980-10-02	180	140	188	116	90	8565.61	8	2	42	25857.5	2505	2663.38	45.125	1980-08-21	5902.23	4	0	0	0	0	2	1	1	4	27
1	1980-10-06	160	120	188	116	90	8565.61	16	2	46	25857.5	2506	2663.38	45.125	1980-08-21	5902.23	4	0	0	0	0	3	5	4	4	27
1	1980-10-09	140	70	188	116	90	8565.61	42	2	49	25857.5	2507	2663.38	45.125	1980-08-21	5902.23	8	0	0	0	0	4	20	10	8	27
1	1980-10-13	130	80	188	116	90	8565.61	74	2	53	25857.5	2508	2663.38	45.125	1980-08-21	5902.23	20	0	0	0	0	4	20	30	20	27
1	1980-10-16	140	80	188	116	90	8565.61	99	2	56	25857.5	2509	2663.38	45.125	1980-08-21	5902.23	25	0	0	0	0	4	20	50	25	27
1	1980-10-20	110	80	188	116	90	8565.61	99	3	60	25857.5	2510	2663.38	45.125	1980-08-21	5902.23	25	0	0	0	0	4	20	50	25	27
1	1980-08-21	220	190	189	79	71	4541.58	0	1	0	13713	2511	0	0	1980-08-21	4541.58	0	0	0	0	0	0	0	0	0	27
1	1980-08-26	200	150	189	86	77	5362.89	1	2	5	16191.7	2512	821.319	18.0844	1980-08-21	4541.58	1	0	0	0	0	0	0	0	1	27
1	1980-08-29	220	160	189	87	79	5562.12	1	2	8	16793	2513	1020.54	22.4711	1980-08-21	4541.58	1	0	0	0	0	0	0	0	1	27
1	1980-09-02	200	160	189	89	80	5764.98	1	2	12	17405.2	2514	1223.4	26.9378	1980-08-21	4541.58	1	0	0	0	0	0	0	0	1	27
1	1980-09-05	200	170	189	90	81	5902.23	4	2	15	17819.4	2515	1360.66	29.96	1980-08-21	4541.58	3	0	1	0	0	0	0	0	4	27
1	1980-09-08	220	170	189	90	81	5902.23	4	2	18	17819.4	2516	1360.66	29.96	1980-08-21	4541.58	3	0	1	0	0	0	0	0	4	27
1	1980-09-11	190	160	189	91	82	6041.1	4	2	21	18238.6	2517	1499.53	33.0178	1980-08-21	4541.58	3	0	1	0	0	0	0	0	4	27
1	1980-09-16	170	140	189	92	82	6111.14	4	2	26	18449.9	2518	1569.57	34.56	1980-08-21	4541.58	3	0	1	0	0	0	0	0	4	27
1	1980-09-19	180	150	189	92	82	6111.14	4	2	29	18449.9	2519	1569.57	34.56	1980-08-21	4541.58	3	0	1	0	0	0	0	0	4	27
1	1980-09-22	210	150	189	93	82	6181.59	4	2	32	18662.5	2520	1640.01	36.1111	1980-08-21	4541.58	3	0	1	0	0	0	0	0	4	27
1	1980-09-25	200	160	189	93	82	6181.59	7	2	35	18662.5	2521	1640.01	36.1111	1980-08-21	4541.58	4	0	1	0	0	0	0	2	5	27
1	1980-09-29	200	150	189	93	82	6181.59	12	2	39	18662.5	2522	1640.01	36.1111	1980-08-21	4541.58	5	0	1	0	0	0	2	4	6	27
1	1980-10-02	180	140	189	93	82	6181.59	20	2	42	18662.5	2523	1640.01	36.1111	1980-08-21	4541.58	5	0	1	0	0	6	5	3	6	27
1	1980-10-06	160	120	189	93	82	6181.59	91	2	46	18662.5	2524	1640.01	36.1111	1980-08-21	4541.58	20	0	1	0	0	7	0	63	21	27
1	1980-10-09	140	70	189	93	82	6181.59	91	2	49	18662.5	2525	1640.01	36.1111	1980-08-21	4541.58	20	0	1	0	0	7	0	63	21	27
1	1980-10-13	130	80	189	93	82	6181.59	91	3	53	18662.5	2526	1640.01	36.1111	1980-08-21	4541.58	20	0	1	0	0	7	0	63	21	27
1	1980-08-21	220	190	190	69	62	3463.91	0	1	0	10460.6	2527	0	0	1980-08-21	3463.91	0	0	0	0	0	0	0	0	0	27
1	1980-08-26	200	150	190	81	70	4602.33	1	2	5	13896.3	2528	1138.42	32.8652	1980-08-21	3463.91	1	0	0	0	0	0	0	0	1	27
1	1980-08-29	220	160	190	85	75	5167.3	1	2	8	15601.4	2529	1703.39	49.1755	1980-08-21	3463.91	1	0	0	0	0	0	0	0	1	27
1	1980-09-02	200	160	190	89	77	5562.12	1	2	12	16793	2530	2098.21	60.5734	1980-08-21	3463.91	1	0	0	0	0	0	0	0	1	27
1	1980-09-05	200	170	190	88	77	5495.31	2	2	15	16591.3	2531	2031.4	58.6446	1980-08-21	3463.91	2	0	0	0	0	0	0	0	2	27
1	1980-09-08	220	170	190	88	78	5562.12	2	2	18	16793	2532	2098.21	60.5734	1980-08-21	3463.91	2	0	0	0	0	0	0	0	2	27
1	1980-09-11	190	160	190	88	78	5562.12	2	2	21	16793	2533	2098.21	60.5734	1980-08-21	3463.91	2	0	0	0	0	0	0	0	2	27
1	1980-09-16	170	140	190	90	80	5833.4	4	2	26	17611.7	2534	2369.49	68.4051	1980-08-21	3463.91	4	0	0	0	0	0	0	0	4	27
1	1980-09-19	180	150	190	90	80	5833.4	7	2	29	17611.7	2535	2369.49	68.4051	1980-08-21	3463.91	6	0	0	0	0	0	1	0	6	27
1	1980-09-22	210	150	190	90	80	5833.4	8	2	32	17611.7	2536	2369.49	68.4051	1980-08-21	3463.91	6	0	0	0	0	0	1	1	6	27
1	1980-09-25	200	160	190	90	80	5833.4	18	2	35	17611.7	2537	2369.49	68.4051	1980-08-21	3463.91	13	0	0	0	0	0	2	3	13	27
1	1980-09-29	200	150	190	90	80	5833.4	24	2	39	17611.7	2538	2369.49	68.4051	1980-08-21	3463.91	15	0	0	0	0	0	3	6	15	27
1	1980-10-02	180	140	190	90	80	5833.4	80	2	42	17611.7	2539	2369.49	68.4051	1980-08-21	3463.91	58	0	0	0	0	0	2	20	58	27
1	1980-10-06	160	120	190	90	80	5833.4	99	2	46	17611.7	2540	2369.49	68.4051	1980-08-21	3463.91	58	0	0	0	0	0	0	41	58	27
1	1980-10-09	140	70	190	90	80	5833.4	94	2	49	17611.7	2541	2369.49	68.4051	1980-08-21	3463.91	59	0	0	0	0	0	0	35	59	27
1	1980-10-13	130	80	190	90	80	5833.4	94	3	53	17611.7	2542	2369.49	68.4051	1980-08-21	3463.91	59	0	0	0	0	0	0	35	59	28
1	1980-08-26	200	150	191	80	58	3843.99	0	1	0	11607.7	2543	0	0	1980-08-26	3843.99	0	0	0	0	0	0	0	0	0	28
1	1980-08-29	220	160	191	90	78	5696.95	0	2	3	17199.9	2544	1852.96	48.2042	1980-08-26	3843.99	0	0	0	0	0	0	0	0	0	28
1	1980-09-02	200	160	191	92	80	5971.47	2	2	7	18028.4	2545	2127.48	55.3455	1980-08-26	3843.99	2	0	0	0	0	0	0	0	2	28
1	1980-09-05	200	170	191	93	82	6181.59	2	2	10	18662.5	2546	2337.6	60.8118	1980-08-26	3843.99	2	0	0	0	0	0	0	0	2	28
1	1980-09-08	220	170	191	94	82	6252.44	2	2	13	18876.4	2547	2408.45	62.6549	1980-08-26	3843.99	2	0	0	0	0	0	0	0	2	28
1	1980-09-11	190	160	191	95	83	6395.35	4	2	16	19307.7	2548	2551.36	66.3726	1980-08-26	3843.99	2	0	0	0	0	0	2	0	2	28
1	1980-09-16	170	140	191	95	83	6395.35	9	2	21	19307.7	2549	2551.36	66.3726	1980-08-26	3843.99	3	0	0	0	0	0	4	2	3	28
1	1980-09-19	180	150	191	95	83	6395.35	14	2	24	19307.7	2550	2551.36	66.3726	1980-08-26	3843.99	8	0	0	0	0	0	4	2	8	28
1	1980-09-22	210	150	191	95	83	6395.35	15	2	27	19307.7	2551	2551.36	66.3726	1980-08-26	3843.99	9	0	0	0	0	0	4	2	9	28
1	1980-09-25	200	160	191	95	84	6467.41	17	2	30	19525.1	2552	2623.42	68.2472	1980-08-26	3843.99	11	0	0	0	0	0	4	2	11	28
1	1980-09-29	200	150	191	95	84	6467.41	20	2	34	19525.1	2553	2623.42	68.2472	1980-08-26	3843.99	12	0	0	0	0	0	5	3	12	28
1	1980-10-02	180	140	191	95	84	6467.41	21	2	37	19525.1	2554	2623.42	68.2472	1980-08-26	3843.99	12	0	0	0	0	1	5	3	12	28
1	1980-10-06	160	120	191	95	84	6467.41	100	2	41	19525.1	2555	2623.42	68.2472	1980-08-26	3843.99	25	0	0	0	0	1	55	19	25	28
1	1980-10-09	140	70	191	95	84	6467.41	100	2	44	19525.1	2556	2623.42	68.2472	1980-08-26	3843.99	25	0	0	0	0	3	0	72	25	28
1	1980-10-13	130	80	191	95	84	6467.41	100	3	48	19525.1	2557	2623.42	68.2472	1980-08-26	3843.99	25	0	0	0	0	3	0	72	25	28
1	1980-08-26	200	150	192	92	76	5696.95	0	1	0	17199.9	2558	0	0	1980-08-26	5696.95	0	0	0	0	0	0	0	0	0	28
1	1980-08-29	220	160	192	105	87	7440.92	0	2	3	22463.2	2559	1743.96	30.6122	1980-08-26	5696.95	0	0	0	0	0	0	0	0	0	28
1	1980-09-02	200	160	192	110	90	8073.91	0	2	7	24373.6	2560	2376.96	41.7234	1980-08-26	5696.95	0	0	0	0	0	0	0	0	0	28
1	1980-09-05	200	170	192	111	91	8236.2	1	2	10	24863.4	2561	2539.25	44.572	1980-08-26	5696.95	1	0	0	0	0	0	0	0	1	28
1	1980-09-08	220	170	192	111	92	8317.95	2	2	13	25110.1	2562	2620.99	46.0069	1980-08-26	5696.95	2	0	0	0	0	0	0	0	2	28
1	1980-09-11	190	160	192	113	93	8565.61	3	2	16	25857.5	2563	2868.66	50.3543	1980-08-26	5696.95	3	0	0	0	0	0	0	0	3	28
1	1980-09-16	170	140	192	113	93	8565.61	46	2	21	25857.5	2564	2868.66	50.3543	1980-08-26	5696.95	15	0	0	30	1	0	0	0	45	28
1	1980-09-19	180	150	192	113	93	8565.61	56	2	24	25857.5	2565	2868.66	50.3543	1980-08-26	5696.95	18	0	0	30	1	0	0	7	48	28
1	1980-09-22	210	150	192	113	93	8565.61	76	2	27	25857.5	2566	2868.66	50.3543	1980-08-26	5696.95	18	0	0	30	1	0	20	7	48	28
1	1980-09-25	200	160	192	113	93	8565.61	77	2	30	25857.5	2567	2868.66	50.3543	1980-08-26	5696.95	18	0	0	30	1	0	20	8	48	28
1	1980-09-29	200	150	192	113	93	8565.61	79	2	34	25857.5	2568	2868.66	50.3543	1980-08-26	5696.95	20	0	0	30	1	0	3	25	50	28
1	1980-10-02	180	140	192	113	93	8565.61	91	2	37	25857.5	2569	2868.66	50.3543	1980-08-26	5696.95	25	0	0	30	1	0	0	35	55	28
1	1980-10-06	160	120	192	113	93	8565.61	91	3	41	25857.5	2570	2868.66	50.3543	1980-08-26	5696.95	25	0	0	30	1	0	0	35	55	28
1	1980-08-26	200	150	194	70	62	3517	0	1	0	10620.8	2571	0	0	1980-08-26	3517	0	0	0	0	0	0	0	0	0	28
1	1980-08-29	220	160	194	73	62	3678.68	0	2	3	11108.8	2572	161.68	4.59711	1980-08-26	3517	0	0	0	0	0	0	0	0	0	28
1	1980-09-02	200	160	194	75	62	3788.48	1	2	7	11440.1	2573	271.485	7.71924	1980-08-26	3517	1	0	0	0	0	0	0	0	1	28
1	1980-09-05	200	170	194	75	62	3788.48	3	2	10	11440.1	2574	271.485	7.71924	1980-08-26	3517	3	0	0	0	0	0	0	0	3	28
1	1980-09-08	220	170	194	75	62	3788.48	7	2	13	11440.1	2575	271.485	7.71924	1980-08-26	3517	7	0	0	0	0	0	0	0	7	28
1	1980-09-11	190	160	194	75	62	3788.48	28	2	16	11440.1	2576	271.485	7.71924	1980-08-26	3517	28	0	0	0	0	0	0	0	28	28
1	1980-09-16	170	140	194	75	62	3788.48	70	2	21	11440.1	2577	271.485	7.71924	1980-08-26	3517	65	0	0	0	0	0	5	0	65	28
1	1980-09-19	180	150	194	75	62	3788.48	95	2	24	11440.1	2578	271.485	7.71924	1980-08-26	3517	75	0	0	0	0	0	15	5	75	28
1	1980-09-22	210	150	194	75	62	3788.48	156	2	27	11440.1	2579	271.485	7.71924	1980-08-26	3517	75	0	0	0	0	0	1	80	75	28
1	1980-09-25	200	160	194	75	62	3788.48	95	2	30	11440.1	2580	271.485	7.71924	1980-08-26	3517	75	0	0	0	0	0	1	19	75	28
1	1980-09-29	200	150	194	75	62	3788.48	95	2	34	11440.1	2581	271.485	7.71924	1980-08-26	3517	75	0	0	0	0	0	1	19	75	28
1	1980-10-02	180	140	194	75	62	3788.48	95	2	37	11440.1	2582	271.485	7.71924	1980-08-26	3517	75	0	0	0	0	0	0	20	75	28
1	1980-10-06	160	120	194	75	62	3788.48	95	2	41	11440.1	2583	271.485	7.71924	1980-08-26	3517	75	0	0	0	0	0	0	20	75	28
1	1980-10-09	140	70	194	75	62	3788.48	95	3	44	11440.1	2584	271.485	7.71924	1980-08-26	3517	75	0	0	0	0	0	0	20	75	28
1	1980-08-26	200	150	195	76	73	4481.22	0	1	0	13530.8	2585	0	0	1980-08-26	4481.22	0	0	0	0	0	0	0	0	0	28
1	1980-08-29	220	160	195	95	80	6181.59	1	2	3	18662.5	2586	1700.37	37.9442	1980-08-26	4481.22	1	0	0	0	0	0	0	0	1	28
1	1980-09-02	200	160	195	96	83	6467.41	3	2	7	19525.1	2587	1986.18	44.3223	1980-08-26	4481.22	3	0	0	0	0	0	0	0	3	28
1	1980-09-05	200	170	195	99	84	6759.68	5	2	10	20407.2	2588	2278.46	50.8446	1980-08-26	4481.22	5	0	0	0	0	0	0	0	5	28
1	1980-09-08	220	170	195	99	84	6759.68	5	2	13	20407.2	2589	2278.46	50.8446	1980-08-26	4481.22	5	0	0	0	0	0	0	0	5	28
1	1980-09-11	190	160	195	101	84	6908.24	5	2	16	20855.6	2590	2427.02	54.1597	1980-08-26	4481.22	5	0	0	0	0	0	0	0	5	28
1	1980-09-16	170	140	195	102	86	7134.11	9	2	21	21537.2	2591	2652.89	59.2	1980-08-26	4481.22	8	0	0	0	0	0	1	0	8	28
1	1980-09-19	180	150	195	102	86	7134.11	9	2	24	21537.2	2592	2652.89	59.2	1980-08-26	4481.22	8	0	0	0	0	0	0	1	8	28
1	1980-09-22	210	150	195	102	86	7134.11	16	2	27	21537.2	2593	2652.89	59.2	1980-08-26	4481.22	13	0	0	0	0	0	1	2	13	28
1	1980-09-25	200	160	195	102	86	7134.11	35	2	30	21537.2	2594	2652.89	59.2	1980-08-26	4481.22	15	0	0	0	0	0	15	5	15	28
1	1980-09-29	200	150	195	102	86	7134.11	62	2	34	21537.2	2595	2652.89	59.2	1980-08-26	4481.22	17	0	0	0	0	0	35	10	17	28
1	1980-10-02	180	140	195	102	86	7134.11	96	2	37	21537.2	2596	2652.89	59.2	1980-08-26	4481.22	17	0	0	0	0	2	12	65	17	28
1	1980-10-06	160	120	195	102	86	7134.11	94	2	41	21537.2	2597	2652.89	59.2	1980-08-26	4481.22	19	0	0	0	0	2	2	71	19	28
1	1980-10-09	140	70	195	102	86	7134.11	94	2	44	21537.2	2598	2652.89	59.2	1980-08-26	4481.22	19	0	0	0	0	2	2	71	19	28
1	1980-10-13	130	80	195	102	86	7134.11	89	2	48	21537.2	2599	2652.89	59.2	1980-08-26	4481.22	19	0	0	0	0	0	0	70	19	28
1	1980-10-16	140	80	195	102	86	7134.11	89	3	51	21537.2	2600	2652.89	59.2	1980-08-26	4481.22	19	0	0	0	0	0	0	70	19	28
1	1980-08-26	200	150	196	70	58	3307.07	0	1	0	9987.26	2601	0	0	1980-08-26	3307.07	0	0	0	0	0	0	0	0	0	28
1	1980-08-29	220	160	196	70	58	3307.07	0	3	3	9987.26	2602	0	0	1980-08-26	3307.07	0	0	0	0	0	0	0	0	0	28
1	1980-08-29	220	160	197	90	75	5495.31	1	1	0	16591.3	2603	0	0	1980-08-29	5495.31	1	0	0	0	0	0	0	0	1	29
1	1980-09-02	200	160	197	90	82	5971.47	1	2	4	18028.4	2604	476.159	8.66483	1980-08-29	5495.31	1	0	0	0	0	0	0	0	1	29
1	1980-09-05	200	170	197	100	83	6759.68	3	2	7	20407.2	2605	1264.37	23.0083	1980-08-29	5495.31	3	0	0	0	0	0	0	0	3	29
1	1980-09-08	220	170	197	102	85	7058.42	5	2	10	21308.8	2606	1563.11	28.4444	1980-08-29	5495.31	5	0	0	0	0	0	0	0	5	29
1	1980-09-11	190	160	197	102	85	7058.42	6	2	13	21308.8	2607	1563.11	28.4444	1980-08-29	5495.31	6	0	0	0	0	0	0	0	6	29
1	1980-09-16	170	140	197	102	86	7134.11	17	2	18	21537.2	2608	1638.8	29.8219	1980-08-29	5495.31	15	0	0	0	0	0	2	0	15	29
1	1980-09-19	180	150	197	102	87	7210.21	23	2	21	21766.9	2609	1714.9	31.2066	1980-08-29	5495.31	18	0	0	0	0	0	2	3	18	29
1	1980-09-22	210	150	197	102	87	7210.21	28	2	24	21766.9	2610	1714.9	31.2066	1980-08-29	5495.31	22	0	0	0	0	0	2	4	22	29
1	1980-09-25	200	160	197	102	87	7210.21	33	2	27	21766.9	2611	1714.9	31.2066	1980-08-29	5495.31	27	0	0	0	0	0	1	5	27	29
1	1980-09-29	200	150	197	102	87	7210.21	49	2	31	21766.9	2612	1714.9	31.2066	1980-08-29	5495.31	40	0	0	0	0	0	4	5	40	29
1	1980-10-02	180	140	197	102	87	7210.21	60	2	34	21766.9	2613	1714.9	31.2066	1980-08-29	5495.31	40	0	0	0	0	0	10	10	40	29
1	1980-10-06	160	120	197	102	87	7210.21	65	2	38	21766.9	2614	1714.9	31.2066	1980-08-29	5495.31	40	0	0	0	0	0	10	15	40	29
1	1980-10-09	140	70	197	102	87	7210.21	73	2	41	21766.9	2615	1714.9	31.2066	1980-08-29	5495.31	40	0	0	0	0	0	8	25	40	29
1	1980-10-13	130	80	197	102	87	7210.21	67	2	45	21766.9	2616	1714.9	31.2066	1980-08-29	5495.31	40	0	0	0	0	2	0	25	40	29
1	1980-10-16	140	80	197	102	87	7210.21	67	3	48	21766.9	2617	1714.9	31.2066	1980-08-29	5495.31	40	0	0	0	0	2	0	25	40	29
1	1980-08-29	220	160	198	71	64	3678.68	0	1	0	11108.8	2618	0	0	1980-08-29	3678.68	0	0	0	0	0	0	0	0	0	29
1	1980-09-02	200	160	198	90	82	5971.47	1	2	4	18028.4	2619	2292.79	62.3265	1980-08-29	3678.68	1	0	0	0	0	0	0	0	1	29
1	1980-09-05	200	170	198	93	85	6395.35	2	2	7	19307.7	2620	2716.67	73.8491	1980-08-29	3678.68	2	0	0	0	0	0	0	0	2	29
1	1980-09-08	220	170	198	93	85	6395.35	8	2	10	19307.7	2621	2716.67	73.8491	1980-08-29	3678.68	8	0	0	0	0	0	0	0	8	29
1	1980-09-11	190	160	198	94	86	6539.87	8	2	13	19743.8	2622	2861.19	77.7778	1980-08-29	3678.68	8	0	0	0	0	0	0	0	8	29
1	1980-09-16	170	140	198	95	87	6686.01	15	2	18	20184.9	2623	3007.33	81.7503	1980-08-29	3678.68	15	0	0	0	0	0	0	0	15	29
1	1980-09-19	180	150	198	95	88	6759.68	18	2	21	20407.2	2624	3081	83.7531	1980-08-29	3678.68	18	0	0	0	0	0	0	0	18	29
1	1980-09-22	210	150	198	95	88	6759.68	19	2	24	20407.2	2625	3081	83.7531	1980-08-29	3678.68	18	0	0	0	0	0	0	1	18	29
1	1980-09-25	200	160	198	95	88	6759.68	25	2	27	20407.2	2626	3081	83.7531	1980-08-29	3678.68	22	0	0	0	0	0	0	3	22	29
1	1980-09-29	200	150	198	95	88	6759.68	63	2	31	20407.2	2627	3081	83.7531	1980-08-29	3678.68	30	0	0	0	0	0	25	8	30	29
1	1980-10-02	180	140	198	95	88	6759.68	92	2	34	20407.2	2628	3081	83.7531	1980-08-29	3678.68	30	0	0	0	0	2	20	40	30	29
1	1980-10-06	160	120	198	95	88	6759.68	92	2	38	20407.2	2629	3081	83.7531	1980-08-29	3678.68	30	0	0	0	0	2	5	55	30	29
1	1980-10-09	140	70	198	95	88	6759.68	92	3	41	20407.2	2630	3081	83.7531	1980-08-29	3678.68	30	0	0	0	0	2	5	55	30	29
1	1980-08-29	220	160	199	45	39	1424.24	0	1	0	4304.86	2631	0	0	1980-08-29	1424.24	0	0	0	0	0	0	0	0	0	29
1	1980-09-02	200	160	199	52	44	1860.23	8	2	4	5620.68	2632	435.991	30.6122	1980-08-29	1424.24	8	0	0	0	0	0	0	0	8	29
1	1980-09-05	200	170	199	53	44	1899.19	10	2	7	5738.25	2633	474.948	33.3475	1980-08-29	1424.24	10	0	0	0	0	0	0	0	10	29
1	1980-09-08	220	170	199	53	44	1899.19	15	2	10	5738.25	2634	474.948	33.3475	1980-08-29	1424.24	15	0	0	0	0	0	0	0	15	29
1	1980-09-11	190	160	199	54	45	1978.31	35	2	13	5977.05	2635	554.072	38.9031	1980-08-29	1424.24	35	0	0	0	0	0	0	0	35	29
1	1980-09-16	170	140	199	54	45	1978.31	66	2	18	5977.05	2636	554.072	38.9031	1980-08-29	1424.24	60	0	0	0	0	0	5	1	60	29
1	1980-09-19	180	150	199	55	46	2059.05	83	2	21	6220.72	2637	634.811	44.572	1980-08-29	1424.24	65	0	0	0	0	0	10	8	65	29
1	1980-09-22	210	150	199	55	46	2059.05	100	2	24	6220.72	2638	634.811	44.572	1980-08-29	1424.24	70	0	0	0	0	0	0	30	70	29
1	1980-09-25	200	160	199	55	46	2059.05	100	3	27	6220.72	2639	634.811	44.572	1980-08-29	1424.24	70	0	0	0	0	0	0	30	70	29
1	1980-08-29	220	160	200	67	59	3204.54	0	1	0	9677.79	2640	0	0	1980-08-29	3204.54	0	0	0	0	0	0	0	0	0	29
1	1980-09-02	200	160	200	83	72	4849.39	2	2	4	14642	2641	1644.86	51.3291	1980-08-29	3204.54	2	0	0	0	0	0	0	0	2	29
1	1980-09-05	200	170	200	85	74	5102.91	5	2	7	15407.1	2642	1898.38	59.2404	1980-08-29	3204.54	5	0	0	0	0	0	0	0	5	29
1	1980-09-08	220	170	200	85	74	5102.91	5	2	10	15407.1	2643	1898.38	59.2404	1980-08-29	3204.54	5	0	0	0	0	0	0	0	5	29
1	1980-09-11	190	160	200	89	76	5495.31	12	2	13	16591.3	2644	2290.77	71.4853	1980-08-29	3204.54	12	0	0	0	0	0	0	0	12	29
1	1980-09-16	170	140	200	89	76	5495.31	15	2	18	16591.3	2645	2290.77	71.4853	1980-08-29	3204.54	15	0	0	0	0	0	0	0	15	29
1	1980-09-19	180	150	200	89	78	5629.33	19	2	21	16995.8	2646	2424.8	75.6677	1980-08-29	3204.54	18	0	0	0	0	0	0	1	18	29
1	1980-09-22	210	150	200	89	80	5764.98	22	2	24	17405.2	2647	2560.44	79.9005	1980-08-29	3204.54	18	0	0	0	0	0	3	1	18	29
1	1980-09-25	200	160	200	89	80	5764.98	28	2	27	17405.2	2648	2560.44	79.9005	1980-08-29	3204.54	23	0	0	0	0	0	4	1	23	29
1	1980-09-29	200	150	200	89	80	5764.98	40	2	31	17405.2	2649	2560.44	79.9005	1980-08-29	3204.54	23	0	0	0	0	0	10	7	23	29
1	1980-10-02	180	140	200	89	80	5764.98	95	2	34	17405.2	2650	2560.44	79.9005	1980-08-29	3204.54	30	0	0	0	0	0	45	20	30	29
1	1980-10-06	160	120	200	89	80	5764.98	95	2	38	17405.2	2651	2560.44	79.9005	1980-08-29	3204.54	30	0	0	0	0	0	0	65	30	29
1	1980-10-09	140	70	200	89	80	5764.98	95	3	41	17405.2	2652	2560.44	79.9005	1980-08-29	3204.54	30	0	0	0	0	0	0	65	30	29
1	1980-08-29	220	160	201	74	64	3843.99	0	1	0	11607.7	2653	0	0	1980-08-29	3843.99	0	0	0	0	0	0	0	0	0	29
1	1980-09-02	200	160	201	98	88	6983.13	2	2	4	21081.6	2654	3139.14	81.6635	1980-08-29	3843.99	2	0	0	0	0	0	0	0	2	29
1	1980-09-05	200	170	201	103	92	7675.26	3	2	7	23170.4	2655	3831.27	99.6692	1980-08-29	3843.99	3	0	0	0	0	0	0	0	3	29
1	1980-09-08	220	170	201	106	95	8154.85	6	2	10	24617.9	2656	4310.86	112.146	1980-08-29	3843.99	6	0	0	0	0	0	0	0	6	29
1	1980-09-11	190	160	201	107	95	8236.2	7	2	13	24863.4	2657	4392.21	114.262	1980-08-29	3843.99	7	0	0	0	0	0	0	0	7	29
1	1980-09-16	170	140	201	107	95	8236.2	13	2	18	24863.4	2658	4392.21	114.262	1980-08-29	3843.99	13	0	0	0	0	0	0	0	13	29
1	1980-09-19	180	150	201	110	95	8482.65	13	2	21	25607.2	2659	4638.66	120.673	1980-08-29	3843.99	13	0	0	0	0	0	0	0	13	29
1	1980-09-22	210	150	201	110	96	8565.61	15	2	24	25857.5	2660	4721.62	122.831	1980-08-29	3843.99	14	0	0	0	0	0	0	1	14	29
1	1980-09-25	200	160	201	110	96	8565.61	20	2	27	25857.5	2661	4721.62	122.831	1980-08-29	3843.99	19	0	0	0	0	0	0	1	19	29
1	1980-09-29	200	150	201	110	96	8565.61	24	2	31	25857.5	2662	4721.62	122.831	1980-08-29	3843.99	20	0	0	0	0	0	1	3	20	29
1	1980-10-02	180	140	201	110	96	8565.61	34	2	34	25857.5	2663	4721.62	122.831	1980-08-29	3843.99	25	0	0	0	0	0	6	3	25	29
1	1980-10-06	160	120	201	110	96	8565.61	55	2	38	25857.5	2664	4721.62	122.831	1980-08-29	3843.99	25	0	0	0	0	0	30	0	25	30
1	1980-10-09	140	70	201	110	96	8565.61	55	3	41	25857.5	2665	4721.62	122.831	1980-08-29	3843.99	25	0	0	0	0	0	30	0	25	30
1	1980-08-29	220	160	202	74	64	3843.99	2	1	0	11607.7	2666	0	0	1980-08-29	3843.99	2	0	0	0	0	0	0	0	2	30
1	1980-09-02	200	160	202	82	71	4725.06	3	2	4	14266.7	2667	881.066	22.9206	1980-08-29	3843.99	3	0	0	0	0	0	0	0	3	30
1	1980-09-05	200	170	202	84	72	4912.17	6	2	7	14831.4	2668	1068.18	27.7883	1980-08-29	3843.99	6	0	0	0	0	0	0	0	6	30
1	1980-09-08	220	170	202	85	72	4975.35	6	2	10	15022.1	2669	1131.36	29.4318	1980-08-29	3843.99	6	0	0	0	0	0	0	0	6	30
1	1980-09-11	190	160	202	87	75	5297.29	11	2	13	15993.7	2670	1453.3	37.8072	1980-08-29	3843.99	10	0	0	0	0	0	1	0	10	30
1	1980-09-16	170	140	202	88	75	5362.89	14	2	18	16191.7	2671	1518.9	39.5138	1980-08-29	3843.99	10	0	0	0	0	0	3	1	10	30
1	1980-09-19	180	150	202	88	75	5362.89	33	2	21	16191.7	2672	1518.9	39.5138	1980-08-29	3843.99	10	0	0	0	0	0	18	5	10	30
1	1980-09-22	210	150	202	88	75	5362.89	48	2	24	16191.7	2673	1518.9	39.5138	1980-08-29	3843.99	10	0	0	0	0	0	8	30	10	30
1	1980-09-25	200	160	202	88	75	5362.89	90	2	27	16191.7	2674	1518.9	39.5138	1980-08-29	3843.99	10	0	0	0	0	0	20	60	10	30
1	1980-09-29	200	150	202	88	75	5362.89	90	3	31	16191.7	2675	1518.9	39.5138	1980-08-29	3843.99	10	0	0	0	0	0	20	60	10	30
1	1980-08-29	220	160	203	79	66	4243.85	0	1	0	12814.4	2676	0	0	1980-08-29	4243.85	0	0	0	0	0	0	0	0	0	30
1	1980-09-02	200	160	203	86	73	5102.91	0	2	4	15407.1	2677	859.064	20.2426	1980-08-29	4243.85	0	0	0	0	0	0	0	0	0	30
1	1980-09-05	200	170	203	88	74	5297.29	2	2	7	15993.7	2678	1053.44	24.8228	1980-08-29	4243.85	2	0	0	0	0	0	0	0	2	30
1	1980-09-08	220	170	203	89	75	5428.9	4	2	10	16390.9	2679	1185.05	27.9239	1980-08-29	4243.85	4	0	0	0	0	0	0	0	4	30
1	1980-09-11	190	160	203	90	77	5629.33	4	2	13	16995.8	2680	1385.48	32.6468	1980-08-29	4243.85	4	0	0	0	0	0	0	0	4	30
1	1980-09-16	170	140	203	91	77	5696.95	5	2	18	17199.9	2681	1453.1	34.2402	1980-08-29	4243.85	5	0	0	0	0	0	0	0	5	30
1	1980-09-19	180	150	203	91	78	5764.98	5	2	21	17405.2	2682	1521.13	35.843	1980-08-29	4243.85	5	0	0	0	0	0	0	0	5	30
1	1980-09-22	210	150	203	91	78	5764.98	6	2	24	17405.2	2683	1521.13	35.843	1980-08-29	4243.85	5	0	0	0	0	0	0	1	5	30
1	1980-09-25	200	160	203	92	80	5971.47	7	2	27	18028.4	2684	1727.62	40.7087	1980-08-29	4243.85	5	0	0	0	0	0	1	1	5	30
1	1980-09-29	200	150	203	92	80	5971.47	34	2	31	18028.4	2685	1727.62	40.7087	1980-08-29	4243.85	5	0	0	0	0	0	25	4	5	30
1	1980-10-02	180	140	203	92	80	5971.47	47	2	34	18028.4	2686	1727.62	40.7087	1980-08-29	4243.85	7	0	0	0	0	0	15	25	7	30
1	1980-10-06	160	120	203	92	80	5971.47	73	2	38	18028.4	2687	1727.62	40.7087	1980-08-29	4243.85	7	0	0	0	0	1	25	40	7	30
1	1980-10-09	140	70	203	92	80	5971.47	73	3	41	18028.4	2688	1727.62	40.7087	1980-08-29	4243.85	7	0	0	0	0	1	25	40	7	30
1	1980-08-29	220	160	204	77	64	4012.94	0	1	0	12117.5	2689	0	0	1980-08-29	4012.94	0	0	0	0	0	0	0	0	0	30
1	1980-09-02	200	160	204	91	76	5629.33	1	2	4	16995.8	2690	1616.4	40.2797	1980-08-29	4012.94	1	0	0	0	0	0	0	0	1	30
1	1980-09-05	200	170	204	93	78	5902.23	3	2	7	17819.4	2691	1889.3	47.0801	1980-08-29	4012.94	3	0	0	0	0	0	0	0	3	30
1	1980-09-08	220	170	204	93	78	5902.23	4	2	10	17819.4	2692	1889.3	47.0801	1980-08-29	4012.94	4	0	0	0	0	0	0	0	4	30
1	1980-09-11	190	160	204	97	81	6395.35	6	2	13	19307.7	2693	2382.41	59.3682	1980-08-29	4012.94	6	0	0	0	0	0	0	0	6	30
1	1980-09-16	170	140	204	99	83	6686.01	10	2	18	20184.9	2694	2673.07	66.6113	1980-08-29	4012.94	10	0	0	0	0	0	0	0	10	30
1	1980-09-19	180	150	204	99	83	6686.01	10	2	21	20184.9	2695	2673.07	66.6113	1980-08-29	4012.94	10	0	0	0	0	0	0	0	10	30
1	1980-09-22	210	150	204	100	84	6833.76	11	2	24	20630.8	2696	2820.82	70.2932	1980-08-29	4012.94	11	0	0	0	0	0	0	0	11	30
1	1980-09-25	200	160	204	100	84	6833.76	16	2	27	20630.8	2697	2820.82	70.2932	1980-08-29	4012.94	13	0	0	0	0	0	3	0	13	30
1	1980-09-29	200	150	204	100	84	6833.76	17	2	31	20630.8	2698	2820.82	70.2932	1980-08-29	4012.94	13	0	0	0	0	0	1	3	13	30
1	1980-10-02	180	140	204	100	84	6833.76	26	2	34	20630.8	2699	2820.82	70.2932	1980-08-29	4012.94	20	0	0	0	0	0	4	2	20	30
1	1980-10-06	160	120	204	100	84	6833.76	46	2	38	20630.8	2700	2820.82	70.2932	1980-08-29	4012.94	25	0	0	0	0	1	15	5	25	30
1	1980-10-09	140	70	204	100	84	6833.76	46	2	41	20630.8	2701	2820.82	70.2932	1980-08-29	4012.94	25	0	0	0	0	1	8	12	25	30
1	1980-10-13	130	80	204	100	84	6833.76	42	2	45	20630.8	2702	2820.82	70.2932	1980-08-29	4012.94	25	0	0	0	0	2	3	12	25	30
1	1980-10-16	140	80	204	100	84	6833.76	50	2	48	20630.8	2703	2820.82	70.2932	1980-08-29	4012.94	25	0	0	0	0	0	0	25	25	30
1	1980-10-20	110	80	204	100	84	6833.76	50	3	52	20630.8	2704	2820.82	70.2932	1980-08-29	4012.94	25	0	0	0	0	0	0	25	25	30
1	1980-08-29	220	160	205	70	60	3411.23	0	1	0	10301.6	2705	0	0	1980-08-29	3411.23	0	0	0	0	0	0	0	0	0	30
1	1980-09-02	200	160	205	87	75	5297.29	4	2	4	15993.7	2706	1886.07	55.2899	1980-08-29	3411.23	4	0	0	0	0	0	0	0	4	30
1	1980-09-05	200	170	205	89	77	5562.12	10	2	7	16793	2707	2150.89	63.0533	1980-08-29	3411.23	10	0	0	0	0	0	0	0	10	30
1	1980-09-08	220	170	205	90	78	5696.95	20	2	10	17199.9	2708	2285.72	67.0059	1980-08-29	3411.23	20	0	0	0	0	0	0	0	20	30
1	1980-09-11	190	160	205	92	80	5971.47	28	2	13	18028.4	2709	2560.24	75.0533	1980-08-29	3411.23	28	0	0	0	0	0	0	0	28	30
1	1980-09-16	170	140	205	92	80	5971.47	40	2	18	18028.4	2710	2560.24	75.0533	1980-08-29	3411.23	35	0	0	0	0	0	5	0	35	30
1	1980-09-19	180	150	205	92	80	5971.47	45	2	21	18028.4	2711	2560.24	75.0533	1980-08-29	3411.23	35	0	0	0	0	0	6	4	35	30
1	1980-09-22	210	150	205	93	80	6041.1	65	2	24	18238.6	2712	2629.87	77.0947	1980-08-29	3411.23	35	0	0	0	0	0	20	10	35	30
1	1980-09-25	200	160	205	93	80	6041.1	100	2	27	18238.6	2713	2629.87	77.0947	1980-08-29	3411.23	35	0	0	0	0	0	0	65	35	30
1	1980-09-29	200	150	205	93	80	6041.1	100	3	31	18238.6	2714	2629.87	77.0947	1980-08-29	3411.23	35	0	0	0	0	0	0	65	35	30
1	1980-08-29	220	160	206	59	43	2100.02	1	1	0	6344.38	2715	0	0	1980-08-29	2100.02	1	0	0	0	0	0	0	0	1	30
1	1980-09-02	200	160	206	60	50	2442.36	1	2	4	7377.54	2716	342.334	16.3014	1980-08-29	2100.02	1	0	0	0	0	0	0	0	1	30
1	1980-09-05	200	170	206	60	50	2442.36	2	2	7	7377.54	2717	342.334	16.3014	1980-08-29	2100.02	2	0	0	0	0	0	0	0	2	30
1	1980-09-08	220	170	206	63	51	2623.21	2	2	10	7923.37	2718	523.189	24.9135	1980-08-29	2100.02	2	0	0	0	0	0	0	0	2	30
1	1980-09-11	190	160	206	63	51	2623.21	3	2	13	7923.37	2719	523.189	24.9135	1980-08-29	2100.02	3	0	0	0	0	0	0	0	3	30
1	1980-09-16	170	140	206	63	51	2623.21	3	2	18	7923.37	2720	523.189	24.9135	1980-08-29	2100.02	3	0	0	0	0	0	0	0	3	30
1	1980-09-19	180	150	206	63	51	2623.21	3	3	21	7923.37	2721	523.189	24.9135	1980-08-29	2100.02	3	0	0	0	0	0	0	0	3	30
1	1980-08-29	220	160	207	80	69	4481.22	0	1	0	13530.8	2722	0	0	1980-08-29	4481.22	0	0	0	0	0	0	0	0	0	30
1	1980-09-02	200	160	207	95	79	6111.14	2	2	4	18449.9	2723	1629.92	36.3722	1980-08-29	4481.22	2	0	0	0	0	0	0	0	2	30
1	1980-09-05	200	170	207	95	80	6181.59	5	2	7	18662.5	2724	1700.37	37.9442	1980-08-29	4481.22	5	0	0	0	0	0	0	0	5	30
1	1980-09-08	220	170	207	96	81	6323.69	15	2	10	19091.4	2725	1842.47	41.1153	1980-08-29	4481.22	15	0	0	0	0	0	0	0	15	31
1	1980-09-11	190	160	207	96	81	6323.69	20	2	13	19091.4	2726	1842.47	41.1153	1980-08-29	4481.22	20	0	0	0	0	0	0	0	20	31
1	1980-09-16	170	140	207	96	84	6539.87	20	2	18	19743.8	2727	2058.65	45.9394	1980-08-29	4481.22	20	0	0	0	0	0	0	0	20	31
1	1980-09-19	180	150	207	96	84	6539.87	31	2	21	19743.8	2728	2058.65	45.9394	1980-08-29	4481.22	30	0	0	0	0	0	1	0	30	31
1	1980-09-22	210	150	207	96	84	6539.87	35	2	24	19743.8	2729	2058.65	45.9394	1980-08-29	4481.22	30	0	0	0	0	0	0	5	30	31
1	1980-09-25	200	160	207	96	84	6539.87	47	2	27	19743.8	2730	2058.65	45.9394	1980-08-29	4481.22	30	0	0	0	0	0	5	12	30	31
1	1980-09-29	200	150	207	96	84	6539.87	65	2	31	19743.8	2731	2058.65	45.9394	1980-08-29	4481.22	30	0	0	0	0	0	10	25	30	31
1	1980-10-02	180	140	207	96	84	6539.87	76	2	34	19743.8	2732	2058.65	45.9394	1980-08-29	4481.22	30	0	0	0	0	1	20	25	30	31
1	1980-10-06	160	120	207	96	84	6539.87	95	2	38	19743.8	2733	2058.65	45.9394	1980-08-29	4481.22	30	0	0	0	0	1	3	61	30	31
1	1980-10-09	140	70	207	96	84	6539.87	95	3	41	19743.8	2734	2058.65	45.9394	1980-08-29	4481.22	30	0	0	0	0	1	3	61	30	31
1	1980-08-29	220	160	208	66	57	3053.76	0	1	0	9222.74	2735	0	0	1980-08-29	3053.76	0	0	0	0	0	0	0	0	0	31
1	1980-09-02	200	160	208	84	72	4912.17	0	2	4	14831.4	2736	1858.41	60.8566	1980-08-29	3053.76	0	0	0	0	0	0	0	0	0	31
1	1980-09-05	200	170	208	84	73	4975.35	3	2	7	15022.1	2737	1921.59	62.9255	1980-08-29	3053.76	3	0	0	0	0	0	0	0	3	31
1	1980-09-08	220	170	208	85	74	5102.91	5	2	10	15407.1	2738	2049.16	67.1029	1980-08-29	3053.76	5	0	0	0	0	0	0	0	5	31
1	1980-09-11	190	160	208	86	74	5167.3	10	2	13	15601.4	2739	2113.55	69.2114	1980-08-29	3053.76	10	0	0	0	0	0	0	0	10	31
1	1980-09-16	170	140	208	86	74	5167.3	15	2	18	15601.4	2740	2113.55	69.2114	1980-08-29	3053.76	15	0	0	0	0	0	0	0	15	31
1	1980-09-19	180	150	208	86	74	5167.3	15	2	21	15601.4	2741	2113.55	69.2114	1980-08-29	3053.76	15	0	0	0	0	0	0	0	15	31
1	1980-09-22	210	150	208	86	74	5167.3	17	2	24	15601.4	2742	2113.55	69.2114	1980-08-29	3053.76	15	0	0	0	0	0	1	1	15	31
1	1980-09-25	200	160	208	86	74	5167.3	26	2	27	15601.4	2743	2113.55	69.2114	1980-08-29	3053.76	23	0	0	0	0	0	1	2	23	31
1	1980-09-29	200	150	208	86	74	5167.3	44	2	31	15601.4	2744	2113.55	69.2114	1980-08-29	3053.76	35	0	0	0	0	0	5	4	35	31
1	1980-10-02	180	140	208	86	74	5167.3	48	2	34	15601.4	2745	2113.55	69.2114	1980-08-29	3053.76	35	0	0	0	0	0	1	12	35	31
1	1980-10-06	160	120	208	86	74	5167.3	70	2	38	15601.4	2746	2113.55	69.2114	1980-08-29	3053.76	35	0	0	0	0	0	10	25	35	31
1	1980-10-09	140	70	208	86	74	5167.3	70	2	41	15601.4	2747	2113.55	69.2114	1980-08-29	3053.76	35	0	0	0	0	0	5	30	35	31
1	1980-10-13	130	80	208	86	74	5167.3	70	3	45	15601.4	2748	2113.55	69.2114	1980-08-29	3053.76	35	0	0	0	0	0	5	30	35	31
1	1980-08-29	220	160	209	75	65	3956.22	0	1	0	11946.4	2749	0	0	1980-08-29	3956.22	0	0	0	0	0	0	0	0	0	31
1	1980-09-02	200	160	209	93	81	6111.14	0	2	4	18449.9	2750	2154.93	54.4694	1980-08-29	3956.22	0	0	0	0	0	0	0	0	0	31
1	1980-09-05	200	170	209	94	83	6323.69	1	2	7	19091.4	2751	2367.47	59.8418	1980-08-29	3956.22	1	0	0	0	0	0	0	0	1	31
1	1980-09-08	220	170	209	96	84	6539.87	3	2	10	19743.8	2752	2583.65	65.3061	1980-08-29	3956.22	3	0	0	0	0	0	0	0	3	31
1	1980-09-11	190	160	209	96	85	6612.74	4	2	13	19963.7	2753	2656.52	67.148	1980-08-29	3956.22	4	0	0	0	0	0	0	0	4	31
1	1980-09-16	170	140	209	98	85	6759.68	10	2	18	20407.2	2754	2803.46	70.8622	1980-08-29	3956.22	10	0	0	0	0	0	0	0	10	31
1	1980-09-19	180	150	209	98	86	6833.76	12	2	21	20630.8	2755	2877.54	72.7347	1980-08-29	3956.22	11	0	0	0	0	0	1	0	11	31
1	1980-09-22	210	150	209	98	86	6833.76	16	2	24	20630.8	2756	2877.54	72.7347	1980-08-29	3956.22	14	0	0	0	0	0	1	1	14	31
1	1980-09-25	200	160	209	98	86	6833.76	17	2	27	20630.8	2757	2877.54	72.7347	1980-08-29	3956.22	14	0	0	0	0	0	1	2	14	31
1	1980-09-29	200	150	209	99	87	6983.13	19	2	31	21081.6	2758	3026.91	76.5102	1980-08-29	3956.22	16	0	0	0	0	0	1	2	16	31
1	1980-10-02	180	140	209	99	87	6983.13	23	2	34	21081.6	2759	3026.91	76.5102	1980-08-29	3956.22	20	0	0	0	0	0	1	2	20	31
1	1980-10-06	160	120	209	99	87	6983.13	26	2	38	21081.6	2760	3026.91	76.5102	1980-08-29	3956.22	20	0	0	0	0	2	2	2	20	31
1	1980-10-09	140	70	209	99	87	6983.13	26	2	41	21081.6	2761	3026.91	76.5102	1980-08-29	3956.22	20	0	0	0	0	2	2	2	20	31
1	1980-10-13	130	80	209	99	87	6983.13	36	2	45	21081.6	2762	3026.91	76.5102	1980-08-29	3956.22	20	0	0	0	0	2	10	4	20	31
1	1980-10-16	140	80	209	99	87	6983.13	62	2	48	21081.6	2763	3026.91	76.5102	1980-08-29	3956.22	25	0	0	0	0	2	10	25	25	31
1	1980-10-20	110	80	209	99	87	6983.13	62	3	52	21081.6	2764	3026.91	76.5102	1980-08-29	3956.22	25	0	0	0	0	2	10	25	25	31
1	1980-09-02	200	160	210	72	70	4070.06	0	1	0	12289.9	2765	0	0	1980-09-02	4070.06	0	0	0	0	0	0	0	0	0	31
1	1980-09-05	200	170	210	75	76	4602.33	1	2	3	13896.3	2766	532.273	13.0778	1980-09-02	4070.06	1	0	0	0	0	0	0	0	1	31
1	1980-09-08	220	170	210	77	76	4725.06	3	2	6	14266.7	2767	654.996	16.093	1980-09-02	4070.06	3	0	0	0	0	0	0	0	3	31
1	1980-09-11	190	160	210	78	78	4912.17	5	2	9	14831.4	2768	842.109	20.6903	1980-09-02	4070.06	5	0	0	0	0	0	0	0	5	31
1	1980-09-16	170	140	210	80	78	5038.93	10	2	14	15214	2769	968.869	23.8048	1980-09-02	4070.06	10	0	0	0	0	0	0	0	10	31
1	1980-09-19	180	150	210	80	78	5038.93	11	2	17	15214	2770	968.869	23.8048	1980-09-02	4070.06	10	0	0	0	0	0	1	0	10	31
1	1980-09-22	210	150	210	81	80	5232.1	15	2	20	15797	2771	1162.04	28.5509	1980-09-02	4070.06	11	0	0	0	0	0	2	2	11	31
1	1980-09-25	200	160	210	81	80	5232.1	15	2	23	15797	2772	1162.04	28.5509	1980-09-02	4070.06	11	0	0	0	0	0	2	2	11	31
1	1980-09-29	200	150	210	81	80	5232.1	30	2	27	15797	2773	1162.04	28.5509	1980-09-02	4070.06	20	0	0	0	0	0	7	3	20	31
1	1980-10-02	180	140	210	81	80	5232.1	54	2	30	15797	2774	1162.04	28.5509	1980-09-02	4070.06	25	0	0	0	0	0	25	4	25	31
1	1980-10-06	160	120	210	81	80	5232.1	65	2	34	15797	2775	1162.04	28.5509	1980-09-02	4070.06	30	0	0	0	0	0	10	25	30	31
1	1980-10-09	140	70	210	81	80	5232.1	65	3	37	15797	2776	1162.04	28.5509	1980-09-02	4070.06	30	0	0	0	0	0	10	25	30	31
1	1980-09-02	200	160	212	59	50	2398.15	0	1	0	7244.13	2777	0	0	1980-09-02	2398.15	0	0	0	0	0	0	0	0	0	31
1	1980-09-05	200	170	212	62	54	2716.06	1	2	3	8203.59	2778	317.91	13.2565	1980-09-02	2398.15	1	0	0	0	0	0	0	0	1	31
1	1980-09-08	220	170	212	64	55	2858.37	3	2	6	8633.06	2779	460.213	19.1903	1980-09-02	2398.15	3	0	0	0	0	0	0	0	3	31
1	1980-09-11	190	160	212	64	58	3004.3	5	2	9	9073.49	2780	606.149	25.2757	1980-09-02	2398.15	5	0	0	0	0	0	0	0	5	31
1	1980-09-16	170	140	212	66	58	3103.61	10	2	14	9373.21	2781	705.458	29.4167	1980-09-02	2398.15	8	0	0	0	0	0	1	1	8	31
1	1980-09-19	180	150	212	66	58	3103.61	10	2	17	9373.21	2782	705.458	29.4167	1980-09-02	2398.15	8	0	0	0	0	0	1	1	8	31
1	1980-09-22	210	150	212	67	58	3153.87	12	2	20	9524.89	2783	755.718	31.5125	1980-09-02	2398.15	10	0	0	0	0	0	0	2	10	31
1	1980-09-25	200	160	212	67	59	3204.54	12	2	23	9677.79	2784	806.382	33.6251	1980-09-02	2398.15	10	0	0	0	0	0	0	2	10	31
1	1980-09-29	200	150	212	67	59	3204.54	16	2	27	9677.79	2785	806.382	33.6251	1980-09-02	2398.15	10	0	0	0	0	0	2	4	10	31
1	1980-10-02	180	140	212	67	59	3204.54	20	2	30	9677.79	2786	806.382	33.6251	1980-09-02	2398.15	12	0	0	0	0	2	2	4	12	32
1	1980-10-06	160	120	212	67	59	3204.54	37	2	34	9677.79	2787	806.382	33.6251	1980-09-02	2398.15	15	0	0	0	0	2	5	15	15	32
1	1980-10-09	140	70	212	67	59	3204.54	37	3	37	9677.79	2788	806.382	33.6251	1980-09-02	2398.15	15	0	0	0	0	2	5	15	15	32
1	1980-09-02	200	160	213	58	48	2531.98	0	1	0	7648.02	2789	0	0	1980-09-02	2531.98	0	0	0	0	0	0	0	0	0	32
1	1980-09-05	200	170	213	66	54	3004.3	1	2	3	9073.49	2790	472.324	18.6543	1980-09-02	2531.98	1	0	0	0	0	0	0	0	1	32
1	1980-09-08	220	170	213	67	56	3103.61	1	2	6	9373.21	2791	571.633	22.5765	1980-09-02	2531.98	1	0	0	0	0	0	0	0	1	32
1	1980-09-11	190	160	213	70	57	3411.23	1	2	9	10301.6	2792	879.249	34.7258	1980-09-02	2531.98	1	0	0	0	0	0	0	0	1	32
1	1980-09-16	170	140	213	70	60	3517	5	2	14	10620.8	2793	985.017	38.9031	1980-09-02	2531.98	5	0	0	0	0	0	0	0	5	32
1	1980-09-19	180	150	213	70	62	3624.38	12	2	17	10944.9	2794	1092.4	43.1441	1980-09-02	2531.98	12	0	0	0	0	0	0	0	12	32
1	1980-09-22	210	150	213	71	64	3678.68	36	2	20	11108.8	2795	1146.7	45.2886	1980-09-02	2531.98	35	0	0	0	0	0	1	0	35	32
1	1980-09-25	200	160	213	71	64	3678.68	38	2	23	11108.8	2796	1146.7	45.2886	1980-09-02	2531.98	35	0	0	0	0	0	3	0	35	32
1	1980-09-29	200	150	213	71	64	3678.68	95	2	27	11108.8	2797	1146.7	45.2886	1980-09-02	2531.98	35	0	0	0	0	0	25	35	35	32
1	1980-10-02	180	140	213	71	64	4012.94	95	3	30	12117.5	2798	1480.96	58.4901	1980-09-02	2531.98	35	0	0	0	0	0	25	35	35	32
1	1980-09-05	200	170	214	87	70	5428.9	0	1	0	16390.9	2799	0	0	1980-09-05	5428.9	0	0	0	0	0	0	0	0	0	32
1	1980-09-08	220	170	214	95	77	6111.14	1	2	3	18449.9	2800	682.246	12.5669	1980-09-05	5428.9	1	0	0	0	0	0	0	0	1	32
1	1980-09-11	190	160	214	98	79	6395.35	2	2	6	19307.7	2801	966.447	17.8019	1980-09-05	5428.9	2	0	0	0	0	0	0	0	2	32
1	1980-09-16	170	140	214	98	80	6395.35	4	2	11	19307.7	2802	966.447	17.8019	1980-09-05	5428.9	4	0	0	0	0	0	0	0	4	32
1	1980-09-19	180	150	214	98	80	6395.35	7	2	14	19307.7	2803	966.447	17.8019	1980-09-05	5428.9	7	0	0	0	0	0	0	0	7	32
1	1980-09-22	210	150	214	100	80	6539.87	25	2	17	19743.8	2804	1110.97	20.464	1980-09-05	5428.9	25	0	0	0	0	0	0	0	25	32
1	1980-09-25	200	160	214	100	80	6539.87	25	2	20	19743.8	2805	1110.97	20.464	1980-09-05	5428.9	25	0	0	0	0	0	0	0	25	32
1	1980-09-29	200	150	214	100	80	6539.87	42	2	24	19743.8	2806	1110.97	20.464	1980-09-05	5428.9	42	0	0	0	0	0	0	0	42	32
1	1980-10-02	180	140	214	100	80	6539.87	44	2	27	19743.8	2807	1110.97	20.464	1980-09-05	5428.9	42	0	0	0	0	0	0	2	42	32
1	1980-10-06	160	120	214	100	80	6539.87	90	2	31	19743.8	2808	1110.97	20.464	1980-09-05	5428.9	45	0	0	0	0	0	0	45	45	32
1	1980-10-09	140	70	214	100	80	6539.87	90	3	34	19743.8	2809	1110.97	20.464	1980-09-05	5428.9	45	0	0	0	0	0	0	45	45	32
1	1980-09-05	200	170	215	80	69	4481.22	1	1	0	13530.8	2810	0	0	1980-09-05	4481.22	1	0	0	0	0	0	0	0	1	32
1	1980-09-08	220	170	215	85	75	5167.3	2	2	3	15601.4	2811	686.081	15.3101	1980-09-05	4481.22	2	0	0	0	0	0	0	0	2	32
1	1980-09-11	190	160	215	88	77	5495.31	2	2	6	16591.3	2812	1014.08	22.6296	1980-09-05	4481.22	2	0	0	0	0	0	0	0	2	32
1	1980-09-16	170	140	215	90	80	5833.4	5	2	11	17611.7	2813	1352.18	30.1743	1980-09-05	4481.22	5	0	0	0	0	0	0	0	5	32
1	1980-09-19	180	150	215	90	81	5902.23	5	2	14	17819.4	2814	1421.01	31.7103	1980-09-05	4481.22	5	0	0	0	0	0	0	0	5	32
1	1980-09-22	210	150	215	92	82	6111.14	7	2	17	18449.9	2815	1629.92	36.3722	1980-09-05	4481.22	7	0	0	0	0	0	0	0	7	32
1	1980-09-25	200	160	215	92	82	6111.14	13	2	20	18449.9	2816	1629.92	36.3722	1980-09-05	4481.22	13	0	0	0	0	0	0	0	13	32
1	1980-09-29	200	150	215	92	82	6111.14	13	2	24	18449.9	2817	1629.92	36.3722	1980-09-05	4481.22	13	0	0	0	0	0	0	0	13	32
1	1980-10-02	180	140	215	92	82	6111.14	15	2	27	18449.9	2818	1629.92	36.3722	1980-09-05	4481.22	15	0	0	0	0	0	0	0	15	32
1	1980-10-06	160	120	215	92	82	6111.14	25	2	31	18449.9	2819	1629.92	36.3722	1980-09-05	4481.22	15	0	0	0	0	0	0	10	15	32
1	1980-10-09	140	70	215	92	82	6111.14	25	2	34	18449.9	2820	1629.92	36.3722	1980-09-05	4481.22	15	0	0	0	0	0	0	10	15	32
1	1980-10-13	130	80	215	92	82	6111.14	45	2	38	18449.9	2821	1629.92	36.3722	1980-09-05	4481.22	20	0	0	0	0	0	0	25	20	32
1	1980-10-16	140	80	215	92	82	6111.14	57	2	41	18449.9	2822	1629.92	36.3722	1980-09-05	4481.22	25	0	0	0	0	0	7	25	25	32
1	1980-10-20	110	80	215	92	82	6111.14	57	3	45	18449.9	2823	1629.92	36.3722	1980-09-05	4481.22	25	0	0	0	0	0	7	25	25	32
1	1980-09-05	200	170	216	89	77	5562.12	1	1	0	16793	2824	0	0	1980-09-05	5562.12	1	0	0	0	0	0	0	0	1	32
1	1980-09-08	220	170	216	91	78	5764.98	3	2	3	17405.2	2825	202.857	3.64712	1980-09-05	5562.12	3	0	0	0	0	0	0	0	3	32
1	1980-09-11	190	160	216	93	80	6041.1	4	2	6	18238.6	2826	478.985	8.61155	1980-09-05	5562.12	4	0	0	0	0	0	0	0	4	32
1	1980-09-16	170	140	216	95	81	6252.44	5	2	11	18876.4	2827	690.319	12.4111	1980-09-05	5562.12	5	0	0	0	0	0	0	0	5	32
1	1980-09-19	180	150	216	95	81	6252.44	6	2	14	18876.4	2828	690.319	12.4111	1980-09-05	5562.12	6	0	0	0	0	0	0	0	6	32
1	1980-09-22	210	150	216	95	81	6252.44	8	2	17	18876.4	2829	690.319	12.4111	1980-09-05	5562.12	8	0	0	0	0	0	0	0	8	32
1	1980-09-25	200	160	216	97	81	6395.35	9	2	20	19307.7	2830	833.228	14.9804	1980-09-05	5562.12	8	0	0	0	0	0	0	1	8	32
1	1980-09-29	200	150	216	97	81	6395.35	12	2	24	19307.7	2831	833.228	14.9804	1980-09-05	5562.12	10	0	0	0	0	0	1	1	10	32
1	1980-10-02	180	140	216	97	81	6395.35	12	2	27	19307.7	2832	833.228	14.9804	1980-09-05	5562.12	10	0	0	0	0	0	1	1	10	32
1	1980-10-06	160	120	216	97	81	6395.35	20	2	31	19307.7	2833	833.228	14.9804	1980-09-05	5562.12	15	0	0	0	0	0	0	5	15	32
1	1980-10-09	140	70	216	97	81	6395.35	37	2	34	19307.7	2834	833.228	14.9804	1980-09-05	5562.12	25	0	0	0	0	0	0	12	25	32
1	1980-10-13	130	80	216	97	81	6395.35	45	2	38	19307.7	2835	833.228	14.9804	1980-09-05	5562.12	30	0	0	0	0	0	0	15	30	32
1	1980-10-16	140	80	216	97	81	6395.35	57	2	41	19307.7	2836	833.228	14.9804	1980-09-05	5562.12	40	0	0	0	0	0	2	15	40	32
1	1980-10-20	110	80	216	97	81	6395.35	80	2	45	19307.7	2837	833.228	14.9804	1980-09-05	5562.12	40	0	0	0	0	0	0	40	40	32
1	1980-10-23	100	80	216	97	81	6395.35	80	3	48	19307.7	2838	833.228	14.9804	1980-09-05	5562.12	40	0	0	0	0	0	0	40	40	32
1	1980-09-05	200	170	217	77	68	4243.85	1	1	0	12814.4	2839	0	0	1980-09-05	4243.85	1	0	0	0	0	0	0	0	1	32
1	1980-09-08	220	170	217	81	72	4725.06	2	2	3	14266.7	2840	481.205	11.3389	1980-09-05	4243.85	2	0	0	0	0	0	0	0	2	32
1	1980-09-11	190	160	217	83	73	4912.17	4	2	6	14831.4	2841	668.318	15.7479	1980-09-05	4243.85	4	0	0	0	0	0	0	0	4	32
1	1980-09-16	170	140	217	85	75	5167.3	4	2	11	15601.4	2842	923.454	21.7598	1980-09-05	4243.85	4	0	0	0	0	0	0	0	4	32
1	1980-09-19	180	150	217	85	77	5297.29	6	2	14	15993.7	2843	1053.44	24.8228	1980-09-05	4243.85	6	0	0	0	0	0	0	0	6	32
1	1980-09-22	210	150	217	85	77	5297.29	8	2	17	15993.7	2844	1053.44	24.8228	1980-09-05	4243.85	8	0	0	0	0	0	0	0	8	32
1	1980-09-25	200	160	217	85	79	5428.9	8	2	20	16390.9	2845	1185.05	27.9239	1980-09-05	4243.85	8	0	0	0	0	0	0	0	8	32
1	1980-09-29	200	150	217	85	79	5428.9	19	2	24	16390.9	2846	1185.05	27.9239	1980-09-05	4243.85	18	0	0	0	0	0	1	0	18	32
1	1980-10-02	180	140	217	85	79	5428.9	22	2	27	16390.9	2847	1185.05	27.9239	1980-09-05	4243.85	20	0	0	0	0	0	1	1	20	33
1	1980-10-06	160	120	217	85	79	5428.9	22	2	31	16390.9	2848	1185.05	27.9239	1980-09-05	4243.85	20	0	0	0	0	0	0	2	20	33
1	1980-10-09	140	70	217	85	79	5428.9	28	2	34	16390.9	2849	1185.05	27.9239	1980-09-05	4243.85	20	0	0	0	0	0	3	5	20	33
1	1980-10-13	130	80	217	85	79	5428.9	40	2	38	16390.9	2850	1185.05	27.9239	1980-09-05	4243.85	25	0	0	0	0	0	5	10	25	33
1	1980-10-16	140	80	217	85	79	5428.9	55	2	41	16390.9	2851	1185.05	27.9239	1980-09-05	4243.85	25	0	0	0	0	0	10	20	25	33
1	1980-10-20	110	80	217	85	79	5428.9	92	2	45	16390.9	2852	1185.05	27.9239	1980-09-05	4243.85	35	0	0	0	0	0	2	55	35	33
1	1980-10-23	100	80	217	85	79	5428.9	70	2	48	16390.9	2853	1185.05	27.9239	1980-09-05	4243.85	35	0	0	0	0	0	0	35	35	33
1	1980-10-27	100	80	217	85	79	5428.9	70	3	52	16390.9	2854	1185.05	27.9239	1980-09-05	4243.85	35	0	0	0	0	0	0	35	35	33
1	1980-09-05	200	170	218	101	83	6833.76	0	1	0	20630.8	2855	0	0	1980-09-05	6833.76	0	0	0	0	0	0	0	0	0	33
1	1980-09-08	220	170	218	101	83	6833.76	5	2	3	20630.8	2856	0	0	1980-09-05	6833.76	5	0	0	0	0	0	0	0	5	33
1	1980-09-11	190	160	218	110	91	8154.85	5	2	6	24617.9	2857	1321.09	19.3319	1980-09-05	6833.76	5	0	0	0	0	0	0	0	5	33
1	1980-09-16	170	140	218	110	91	8154.85	15	2	11	24617.9	2858	1321.09	19.3319	1980-09-05	6833.76	15	0	0	0	0	0	0	0	15	33
1	1980-09-19	180	150	218	111	93	8400.1	15	2	14	25358	2859	1566.34	22.9206	1980-09-05	6833.76	15	0	0	0	0	0	0	0	15	33
1	1980-09-22	210	150	218	111	95	8565.61	16	2	17	25857.5	2860	1731.85	25.3426	1980-09-05	6833.76	15	0	0	0	0	0	0	1	15	33
1	1980-09-25	200	160	218	111	95	8565.61	16	2	20	25857.5	2861	1731.85	25.3426	1980-09-05	6833.76	15	0	0	0	0	0	0	1	15	33
1	1980-09-29	200	150	218	111	95	8565.61	22	2	24	25857.5	2862	1731.85	25.3426	1980-09-05	6833.76	18	0	0	0	0	0	2	2	18	33
1	1980-10-02	180	140	218	111	95	8565.61	28	2	27	25857.5	2863	1731.85	25.3426	1980-09-05	6833.76	18	0	0	0	0	0	5	5	18	33
1	1980-10-06	160	120	218	111	95	8565.61	36	2	31	25857.5	2864	1731.85	25.3426	1980-09-05	6833.76	20	0	0	0	0	0	6	10	20	33
1	1980-10-09	140	70	218	111	95	8565.61	45	2	34	25857.5	2865	1731.85	25.3426	1980-09-05	6833.76	25	0	0	0	0	0	8	12	25	33
1	1980-10-13	130	80	218	111	95	8565.61	53	2	38	25857.5	2866	1731.85	25.3426	1980-09-05	6833.76	35	0	0	0	0	0	10	8	35	33
1	1980-10-16	140	80	218	111	95	8565.61	60	2	41	25857.5	2867	1731.85	25.3426	1980-09-05	6833.76	35	0	0	0	0	0	15	10	35	33
1	1980-10-20	110	80	218	111	95	8565.61	82	2	45	25857.5	2868	1731.85	25.3426	1980-09-05	6833.76	35	0	0	0	0	0	2	45	35	33
1	1980-10-23	100	80	218	111	95	8565.61	82	3	48	25857.5	2869	1731.85	25.3426	1980-09-05	6833.76	35	0	0	0	0	0	2	45	35	33
1	1980-09-05	200	170	219	70	56	3204.54	0	1	0	9677.79	2870	0	0	1980-09-05	3204.54	0	0	0	0	0	0	0	0	0	33
1	1980-09-08	220	170	219	80	66	4302.59	1	2	3	12991.7	2871	1098.05	34.2656	1980-09-05	3204.54	1	0	0	0	0	0	0	0	1	33
1	1980-09-11	190	160	219	84	69	4725.06	7	2	6	14266.7	2872	1520.52	47.449	1980-09-05	3204.54	7	0	0	0	0	0	0	0	7	33
1	1980-09-16	170	140	219	84	70	4787.02	26	2	11	14453.7	2873	1582.49	49.3827	1980-09-05	3204.54	25	0	0	0	0	0	1	0	25	33
1	1980-09-19	180	150	219	85	72	4975.35	27	2	14	15022.1	2874	1770.81	55.2595	1980-09-05	3204.54	25	0	0	0	0	0	1	1	25	33
1	1980-09-22	210	150	219	85	73	5038.93	30	2	17	15214	2875	1834.39	57.2436	1980-09-05	3204.54	28	0	0	0	0	0	0	2	28	33
1	1980-09-25	200	160	219	85	73	5038.93	33	2	20	15214	2876	1834.39	57.2436	1980-09-05	3204.54	30	0	0	0	0	0	1	2	30	33
1	1980-09-29	200	150	219	85	73	5038.93	38	2	24	15214	2877	1834.39	57.2436	1980-09-05	3204.54	32	0	0	0	0	0	2	4	32	33
1	1980-10-02	180	140	219	85	73	5038.93	57	2	27	15214	2878	1834.39	57.2436	1980-09-05	3204.54	40	0	0	0	0	0	10	7	40	33
1	1980-10-06	160	120	219	85	73	5038.93	80	2	31	15214	2879	1834.39	57.2436	1980-09-05	3204.54	40	0	0	0	0	0	5	35	40	33
1	1980-10-09	140	70	219	85	73	5038.93	95	2	34	15214	2880	1834.39	57.2436	1980-09-05	3204.54	40	0	0	0	0	0	0	55	40	33
1	1980-10-13	130	80	219	85	73	5038.93	46	2	38	15214	2881	1834.39	57.2436	1980-09-05	3204.54	40	0	0	0	0	0	0	6	40	33
1	1980-10-16	140	80	219	85	73	5038.93	46	3	41	15214	2882	1834.39	57.2436	1980-09-05	3204.54	40	0	0	0	0	0	0	6	40	33
1	1980-09-05	200	170	220	82	70	4663.49	0	1	0	14080.9	2883	0	0	1980-09-05	4663.49	0	0	0	0	0	0	0	0	0	33
1	1980-09-08	220	170	220	102	89	7363.61	1	2	3	22229.9	2884	2700.12	57.8991	1980-09-05	4663.49	1	0	0	0	0	0	0	0	1	33
1	1980-09-11	190	160	220	110	95	8482.65	1	2	6	25607.2	2885	3819.16	81.8949	1980-09-05	4663.49	1	0	0	0	0	0	0	0	1	33
1	1980-09-16	170	140	220	114	98	9071.85	4	2	11	27385.3	2886	4408.36	94.5291	1980-09-05	4663.49	3	0	0	0	0	0	0	1	3	33
1	1980-09-19	180	150	220	115	99	9243.82	6	2	14	27904.4	2887	4580.33	98.2168	1980-09-05	4663.49	5	0	0	0	0	0	0	1	5	33
1	1980-09-22	210	150	220	115	99	9243.82	7	2	17	27904.4	2888	4580.33	98.2168	1980-09-05	4663.49	5	0	0	0	0	0	0	2	5	33
1	1980-09-25	200	160	220	117	100	9504.81	10	2	20	28692	2889	4841.32	103.813	1980-09-05	4663.49	8	0	0	0	0	0	0	2	8	33
1	1980-09-29	200	150	220	117	100	9504.81	12	2	24	28692	2890	4841.32	103.813	1980-09-05	4663.49	10	0	0	0	0	0	0	2	10	33
1	1980-10-02	180	140	220	119	100	9680.82	17	2	27	29223.2	2891	5017.33	107.587	1980-09-05	4663.49	15	0	0	0	0	0	0	2	15	33
1	1980-10-06	160	120	220	119	100	9680.82	19	2	31	29223.2	2892	5017.33	107.587	1980-09-05	4663.49	15	0	0	0	0	0	2	2	15	33
1	1980-10-09	140	70	220	119	100	9680.82	20	2	34	29223.2	2893	5017.33	107.587	1980-09-05	4663.49	15	0	0	0	0	0	2	3	15	33
[truncated: 581 more rows]

## Sheet: Description
BS2 1980
A	leaf type: 1=normal, 2=from flower stem
B	date
C	maximum temperature
D	minimum temperature
E	leaf number
F	length
G	width
H	surface; H = 1.028*3.1416*((F+G)/4)*((F+G)/4)
I	% total damage; I = R+S+T+U+V+W+X+Y
J	status: 1=first observation and first occurrence, 2=next observation, 3=last observation; J = IF(E(x)=E(x+1),(IF(AND(E(x)<>E(x-1),B(x)<>28636.5), 1,2)),3)
K	age; K = B-P
L	potential biomass / month; L = (3.018+H)+6.506
M	potential biomass - overall; TODO???
N	absolute growth since day of first occurrence; N = H-Q
O	relative growth since day of first occurrence; O = (H-Q)/Q*100
P	date of first occurrence / creation date; P = IF(E(x)=E(x-1),P(x-1),B(x))
Q	begin surface; Q = IF(E(x)=E(x-1),Q(x-1),H(x))
R	% damage Cataclysta
S	% damage snails
T	% danage microbial decay
U	% damage Septoria villarsiae Desm.
V	% damage autolysis
W	% damage
X	% damage
Y	% damage
Z	% damage; Z = R+S+T+U
